# Supplementary material
Source: HighWire-hosted journal article supplement (https://jitc.bmj.com/content/11/9/e006889)
Supplement: inline-supplementary-material-1 [file inline-supplementary-material-1.xlsx]

## Sheet: AllPeptides
	Modification Type(s)	Protein Name	peptide	phosphopeptide	length	Uniprot	HGNC	class	sample
0		>sp|Q9Y490|TLN1_HUMAN Talin-1 OS=Homo sapiens GN=TLN1 PE=1 SV=3	M.SEIEAKVRY.V	FALSE	9	Q9Y490	TLN1	class I	AML14_DCB
1		>sp|Q9Y490|TLN1_HUMAN Talin-1 OS=Homo sapiens GN=TLN1 PE=1 SV=3	M.SEIEAKVRY.V	FALSE	9	Q9Y490	TLN1	class I	AML14_DCB
2		>sp|Q9Y490|TLN1_HUMAN Talin-1 OS=Homo sapiens GN=TLN1 PE=1 SV=3	E.KTKEVIQEW.N	FALSE	9	Q9Y490	TLN1	class I	AML14_DCB
3		>sp|Q9Y490|TLN1_HUMAN Talin-1 OS=Homo sapiens GN=TLN1 PE=1 SV=3	E.KTKEVIQEW.N	FALSE	9	Q9Y490	TLN1	class I	AML14_DCB
4		>sp|Q9Y490|TLN1_HUMAN Talin-1 OS=Homo sapiens GN=TLN1 PE=1 SV=3	E.KTKEVIQEW.N	FALSE	9	Q9Y490	TLN1	class I	AML14_DCB
5		>sp|Q9Y490|TLN1_HUMAN Talin-1 OS=Homo sapiens GN=TLN1 PE=1 SV=3	N.KMDESKHEI.H	FALSE	9	Q9Y490	TLN1	class I	AML14_DCB
6		>sp|Q9Y490|TLN1_HUMAN Talin-1 OS=Homo sapiens GN=TLN1 PE=1 SV=3	N.KMDESKHEI.H	FALSE	9	Q9Y490	TLN1	class I	AML14_DCB
7	M[+16]	>sp|Q9Y490|TLN1_HUMAN Talin-1 OS=Homo sapiens GN=TLN1 PE=1 SV=3	N.KM[+15.995]DESKHEI.H	FALSE	9	Q9Y490	TLN1	class I	AML14_DCB
8		>sp|Q9Y490|TLN1_HUMAN Talin-1 OS=Homo sapiens GN=TLN1 PE=1 SV=3	K.GLAGAVSEL.L	FALSE	9	Q9Y490	TLN1	class I	AML14_DCB
9		>sp|Q9Y490|TLN1_HUMAN Talin-1 OS=Homo sapiens GN=TLN1 PE=1 SV=3	K.GLAGAVSEL.L	FALSE	9	Q9Y490	TLN1	class I	AML14_DCB
10		>sp|Q9Y490|TLN1_HUMAN Talin-1 OS=Homo sapiens GN=TLN1 PE=1 SV=3	K.GLAGAVSEL.L	FALSE	9	Q9Y490	TLN1	class I	AML14_DCB
11		>sp|Q9Y490|TLN1_HUMAN Talin-1 OS=Homo sapiens GN=TLN1 PE=1 SV=3	Q.ALNELLQHV.K	FALSE	9	Q9Y490	TLN1	class I	AML14_DCB
12		>sp|Q9Y490|TLN1_HUMAN Talin-1 OS=Homo sapiens GN=TLN1 PE=1 SV=3	Q.ALNELLQHV.K	FALSE	9	Q9Y490	TLN1	class I	AML14_DCB
13		>sp|Q9Y490|TLN1_HUMAN Talin-1 OS=Homo sapiens GN=TLN1 PE=1 SV=3	Q.ALNELLQHV.K	FALSE	9	Q9Y490	TLN1	class I	AML14_DCB
14	M[+16]	>sp|Q9Y490|TLN1_HUMAN Talin-1 OS=Homo sapiens GN=TLN1 PE=1 SV=3	K.ILADATAKM[+15.995].V	FALSE	9	Q9Y490	TLN1	class I	AML14_DCB
15		>sp|Q9Y490|TLN1_HUMAN Talin-1 OS=Homo sapiens GN=TLN1 PE=1 SV=3	Q.IPLLVQGV.R	FALSE	8	Q9Y490	TLN1	class I	AML14_DCB
16		>sp|Q9Y490|TLN1_HUMAN Talin-1 OS=Homo sapiens GN=TLN1 PE=1 SV=3	S.TFLEAGVEM.A	FALSE	9	Q9Y490	TLN1	class I	AML14_DCB
17		>sp|Q9Y490|TLN1_HUMAN Talin-1 OS=Homo sapiens GN=TLN1 PE=1 SV=3	S.TFLEAGVEM.A	FALSE	9	Q9Y490	TLN1	class I	AML14_DCB
18		>sp|Q9Y490|TLN1_HUMAN Talin-1 OS=Homo sapiens GN=TLN1 PE=1 SV=3	S.TFLEAGVEM.A	FALSE	9	Q9Y490	TLN1	class I	AML14_DCB
19		>sp|Q9Y490|TLN1_HUMAN Talin-1 OS=Homo sapiens GN=TLN1 PE=1 SV=3	S.TFLEAGVEM.A	FALSE	9	Q9Y490	TLN1	class I	AML14_DCB
20		>sp|Q9Y490|TLN1_HUMAN Talin-1 OS=Homo sapiens GN=TLN1 PE=1 SV=3	S.TFLEAGVEM.A	FALSE	9	Q9Y490	TLN1	class I	AML14_DCB
21	M[+16]	>sp|Q9Y490|TLN1_HUMAN Talin-1 OS=Homo sapiens GN=TLN1 PE=1 SV=3	S.TFLEAGVEM[+15.995].A	FALSE	9	Q9Y490	TLN1	class I	AML14_DCB
22	M[+16]	>sp|Q9Y490|TLN1_HUMAN Talin-1 OS=Homo sapiens GN=TLN1 PE=1 SV=3	S.TFLEAGVEM[+15.995].A	FALSE	9	Q9Y490	TLN1	class I	AML14_DCB
23	M[+16]	>sp|Q9Y490|TLN1_HUMAN Talin-1 OS=Homo sapiens GN=TLN1 PE=1 SV=3	S.TFLEAGVEM[+15.995].A	FALSE	9	Q9Y490	TLN1	class I	AML14_DCB
24	M[+16]	>sp|Q9Y490|TLN1_HUMAN Talin-1 OS=Homo sapiens GN=TLN1 PE=1 SV=3	S.TFLEAGVEM[+15.995].A	FALSE	9	Q9Y490	TLN1	class I	AML14_DCB
25		>sp|Q9Y490|TLN1_HUMAN Talin-1 OS=Homo sapiens GN=TLN1 PE=1 SV=3	L.STDPAAPNL.K	FALSE	9	Q9Y490	TLN1	class I	AML14_DCB
26		>sp|Q9Y490|TLN1_HUMAN Talin-1 OS=Homo sapiens GN=TLN1 PE=1 SV=3	S.HLIEPLANA.A	FALSE	9	Q9Y490	TLN1	class I	AML14_DCB
27		>sp|Q9Y490|TLN1_HUMAN Talin-1 OS=Homo sapiens GN=TLN1 PE=1 SV=3	S.HLIEPLANA.A	FALSE	9	Q9Y490	TLN1	class I	AML14_DCB
28		>sp|Q9Y490|TLN1_HUMAN Talin-1 OS=Homo sapiens GN=TLN1 PE=1 SV=3	A.LLDQTKTLA.E	FALSE	9	Q9Y490	TLN1	class I	AML14_DCB
29		>sp|Q9Y490|TLN1_HUMAN Talin-1 OS=Homo sapiens GN=TLN1 PE=1 SV=3	K.TLAESALQL.L	FALSE	9	Q9Y490	TLN1	class I	AML14_DCB
30		>sp|Q9Y490|TLN1_HUMAN Talin-1 OS=Homo sapiens GN=TLN1 PE=1 SV=3	G.SFVDYQTTM.V	FALSE	9	Q9Y490	TLN1	class I	AML14_DCB
31	M[+16]	>sp|Q9Y490|TLN1_HUMAN Talin-1 OS=Homo sapiens GN=TLN1 PE=1 SV=3	G.SFVDYQTTM[+15.995].V	FALSE	9	Q9Y490	TLN1	class I	AML14_DCB
32		>sp|Q9Y490|TLN1_HUMAN Talin-1 OS=Homo sapiens GN=TLN1 PE=1 SV=3	S.FVDYQTTMV.R	FALSE	9	Q9Y490	TLN1	class I	AML14_DCB
33		>sp|Q9Y490|TLN1_HUMAN Talin-1 OS=Homo sapiens GN=TLN1 PE=1 SV=3	S.DAYTKKELI.E	FALSE	9	Q9Y490	TLN1	class I	AML14_DCB
34		>sp|Q9Y490|TLN1_HUMAN Talin-1 OS=Homo sapiens GN=TLN1 PE=1 SV=3	S.DAYTKKELI.E	FALSE	9	Q9Y490	TLN1	class I	AML14_DCB
35		>sp|Q9Y490|TLN1_HUMAN Talin-1 OS=Homo sapiens GN=TLN1 PE=1 SV=3	S.DAYTKKELI.E	FALSE	9	Q9Y490	TLN1	class I	AML14_DCB
36		>sp|Q9Y490|TLN1_HUMAN Talin-1 OS=Homo sapiens GN=TLN1 PE=1 SV=3	E.LLDHVLLTL.Q	FALSE	9	Q9Y490	TLN1	class I	AML14_DCB
37		>sp|Q9Y490|TLN1_HUMAN Talin-1 OS=Homo sapiens GN=TLN1 PE=1 SV=3	E.LLDHVLLTL.Q	FALSE	9	Q9Y490	TLN1	class I	AML14_DCB
38		>sp|P08238|HS90B_HUMAN Heat shock protein HSP 90-beta OS=Homo sapiens GN=HSP90AB1 PE=1 SV=4	N.KEIFLRELI.S	FALSE	9	P08238	HSP90AB1	class I	AML14_DCB
39		>sp|P08238|HS90B_HUMAN Heat shock protein HSP 90-beta OS=Homo sapiens GN=HSP90AB1 PE=1 SV=4	K.IRYESLTDPSK.L	FALSE	11	P08238	HSP90AB1	class I	AML14_DCB
40		>sp|P08238|HS90B_HUMAN Heat shock protein HSP 90-beta OS=Homo sapiens GN=HSP90AB1 PE=1 SV=4	K.IRYESLTDPSK.L	FALSE	11	P08238	HSP90AB1	class I	AML14_DCB
41		>sp|P08238|HS90B_HUMAN Heat shock protein HSP 90-beta OS=Homo sapiens GN=HSP90AB1 PE=1 SV=4	K.IRYESLTDPSK.L	FALSE	11	P08238	HSP90AB1	class I	AML14_DCB
42		>sp|P08238|HS90B_HUMAN Heat shock protein HSP 90-beta OS=Homo sapiens GN=HSP90AB1 PE=1 SV=4	R.ADHGEPIGR.G	FALSE	9	P08238	HSP90AB1	class I	AML14_DCB
43		>sp|P08238|HS90B_HUMAN Heat shock protein HSP 90-beta OS=Homo sapiens GN=HSP90AB1 PE=1 SV=4	R.ADHGEPIGR.G	FALSE	9	P08238	HSP90AB1	class I	AML14_DCB
44		>sp|P08238|HS90B_HUMAN Heat shock protein HSP 90-beta OS=Homo sapiens GN=HSP90AB1 PE=1 SV=4	K.EDQTEYLEER.R	FALSE	10	P08238	HSP90AB1	class I	AML14_DCB
45		>sp|P08238|HS90B_HUMAN Heat shock protein HSP 90-beta OS=Homo sapiens GN=HSP90AB1 PE=1 SV=4	K.YIDQEELNK.T	FALSE	9	P08238	HSP90AB1	class I	AML14_DCB
46		>sp|P08238|HS90B_HUMAN Heat shock protein HSP 90-beta OS=Homo sapiens GN=HSP90AB1 PE=1 SV=4	K.YIDQEELNK.T	FALSE	9	P08238	HSP90AB1	class I	AML14_DCB
47		>sp|P08238|HS90B_HUMAN Heat shock protein HSP 90-beta OS=Homo sapiens GN=HSP90AB1 PE=1 SV=4	L.AEDKENYKKF.Y	FALSE	10	P08238	HSP90AB1	class I	AML14_DCB
48		>sp|P08238|HS90B_HUMAN Heat shock protein HSP 90-beta OS=Homo sapiens GN=HSP90AB1 PE=1 SV=4	L.AEDKENYKKF.Y	FALSE	10	P08238	HSP90AB1	class I	AML14_DCB
49		>sp|P08238|HS90B_HUMAN Heat shock protein HSP 90-beta OS=Homo sapiens GN=HSP90AB1 PE=1 SV=4	L.AEDKENYKKF.Y	FALSE	10	P08238	HSP90AB1	class I	AML14_DCB
50		>sp|P08238|HS90B_HUMAN Heat shock protein HSP 90-beta OS=Homo sapiens GN=HSP90AB1 PE=1 SV=4	L.AEDKENYKKF.Y	FALSE	10	P08238	HSP90AB1	class I	AML14_DCB
51		>sp|P08238|HS90B_HUMAN Heat shock protein HSP 90-beta OS=Homo sapiens GN=HSP90AB1 PE=1 SV=4	L.AEDKENYKKFY.E	FALSE	11	P08238	HSP90AB1	class I	AML14_DCB
52		>sp|P08238|HS90B_HUMAN Heat shock protein HSP 90-beta OS=Homo sapiens GN=HSP90AB1 PE=1 SV=4	L.AEDKENYKKFY.E	FALSE	11	P08238	HSP90AB1	class I	AML14_DCB
53		>sp|P08238|HS90B_HUMAN Heat shock protein HSP 90-beta OS=Homo sapiens GN=HSP90AB1 PE=1 SV=4	L.AEDKENYKKFY.E	FALSE	11	P08238	HSP90AB1	class I	AML14_DCB
54		>sp|P08238|HS90B_HUMAN Heat shock protein HSP 90-beta OS=Homo sapiens GN=HSP90AB1 PE=1 SV=4	A.EDKENYKKF.Y	FALSE	9	P08238	HSP90AB1	class I	AML14_DCB
55		>sp|P08238|HS90B_HUMAN Heat shock protein HSP 90-beta OS=Homo sapiens GN=HSP90AB1 PE=1 SV=4	K.LGIHEDSTNR.R	FALSE	10	P08238	HSP90AB1	class I	AML14_DCB
56		>sp|P08238|HS90B_HUMAN Heat shock protein HSP 90-beta OS=Homo sapiens GN=HSP90AB1 PE=1 SV=4	K.EQVANSAFVER.V	FALSE	11	P08238	HSP90AB1	class I	AML14_DCB
57		>sp|P08238|HS90B_HUMAN Heat shock protein HSP 90-beta OS=Homo sapiens GN=HSP90AB1 PE=1 SV=4	K.EQVANSAFVER.V	FALSE	11	P08238	HSP90AB1	class I	AML14_DCB
58		>sp|P08238|HS90B_HUMAN Heat shock protein HSP 90-beta OS=Homo sapiens GN=HSP90AB1 PE=1 SV=4	F.DGKSLVSV.T	FALSE	8	P08238	HSP90AB1	class I	AML14_DCB
59		>sp|P08238|HS90B_HUMAN Heat shock protein HSP 90-beta OS=Homo sapiens GN=HSP90AB1 PE=1 SV=4	K.EGLELPEDEEEK.K	FALSE	12	P08238	HSP90AB1	class I	AML14_DCB
60		>sp|P08238|HS90B_HUMAN Heat shock protein HSP 90-beta OS=Homo sapiens GN=HSP90AB1 PE=1 SV=4	E.ILDKKVEKV.T	FALSE	9	P08238	HSP90AB1	class I	AML14_DCB
61		>sp|P08238|HS90B_HUMAN Heat shock protein HSP 90-beta OS=Homo sapiens GN=HSP90AB1 PE=1 SV=4	E.ILDKKVEKV.T	FALSE	9	P08238	HSP90AB1	class I	AML14_DCB
62		>sp|P08238|HS90B_HUMAN Heat shock protein HSP 90-beta OS=Homo sapiens GN=HSP90AB1 PE=1 SV=4	E.ILDKKVEKV.T	FALSE	9	P08238	HSP90AB1	class I	AML14_DCB
63		>sp|P08238|HS90B_HUMAN Heat shock protein HSP 90-beta OS=Homo sapiens GN=HSP90AB1 PE=1 SV=4	I.LDKKVEKV.T	FALSE	8	P08238	HSP90AB1	class I	AML14_DCB
64		>sp|P10316|1A69_HUMAN HLA class I histocompatibility antigen, A-69 alpha chain OS=Homo sapiens GN=HLA-A PE=1 SV=2	A.VMAPRTLVL.L	FALSE	9	P10316	HLA-A	class I	AML14_DCB
65		>sp|P10316|1A69_HUMAN HLA class I histocompatibility antigen, A-69 alpha chain OS=Homo sapiens GN=HLA-A PE=1 SV=2	A.VMAPRTLVL.L	FALSE	9	P10316	HLA-A	class I	AML14_DCB
66		>sp|P10316|1A69_HUMAN HLA class I histocompatibility antigen, A-69 alpha chain OS=Homo sapiens GN=HLA-A PE=1 SV=2	A.VMAPRTLVL.L	FALSE	9	P10316	HLA-A	class I	AML14_DCB
67		>sp|P10316|1A69_HUMAN HLA class I histocompatibility antigen, A-69 alpha chain OS=Homo sapiens GN=HLA-A PE=1 SV=2	V.MAPRTLVL.L	FALSE	8	P10316	HLA-A	class I	AML14_DCB
68		>sp|P10316|1A69_HUMAN HLA class I histocompatibility antigen, A-69 alpha chain OS=Homo sapiens GN=HLA-A PE=1 SV=2	V.MAPRTLVL.L	FALSE	8	P10316	HLA-A	class I	AML14_DCB
69		>sp|P10316|1A69_HUMAN HLA class I histocompatibility antigen, A-69 alpha chain OS=Homo sapiens GN=HLA-A PE=1 SV=2	V.MAPRTLVL.L	FALSE	8	P10316	HLA-A	class I	AML14_DCB
70	M[+16]	>sp|P10316|1A69_HUMAN HLA class I histocompatibility antigen, A-69 alpha chain OS=Homo sapiens GN=HLA-A PE=1 SV=2	V.M[+15.995]APRTLVL.L	FALSE	8	P10316	HLA-A	class I	AML14_DCB
71	M[+16]	>sp|P10316|1A69_HUMAN HLA class I histocompatibility antigen, A-69 alpha chain OS=Homo sapiens GN=HLA-A PE=1 SV=2	V.M[+15.995]APRTLVL.L	FALSE	8	P10316	HLA-A	class I	AML14_DCB
72		>sp|P10316|1A69_HUMAN HLA class I histocompatibility antigen, A-69 alpha chain OS=Homo sapiens GN=HLA-A PE=1 SV=2	A.GSHSMRYFY.T	FALSE	9	P10316	HLA-A	class I	AML14_DCB
73		>sp|P10316|1A69_HUMAN HLA class I histocompatibility antigen, A-69 alpha chain OS=Homo sapiens GN=HLA-A PE=1 SV=2	A.GSHSMRYFY.T	FALSE	9	P10316	HLA-A	class I	AML14_DCB
74		>sp|P10316|1A69_HUMAN HLA class I histocompatibility antigen, A-69 alpha chain OS=Homo sapiens GN=HLA-A PE=1 SV=2	A.GSHSMRYFY.T	FALSE	9	P10316	HLA-A	class I	AML14_DCB
75		>sp|P10316|1A69_HUMAN HLA class I histocompatibility antigen, A-69 alpha chain OS=Homo sapiens GN=HLA-A PE=1 SV=2	W.IEQEGPEYW.D	FALSE	9	P10316	HLA-A	class I	AML14_DCB
76		>sp|P10316|1A69_HUMAN HLA class I histocompatibility antigen, A-69 alpha chain OS=Homo sapiens GN=HLA-A PE=1 SV=2	W.IEQEGPEYW.D	FALSE	9	P10316	HLA-A	class I	AML14_DCB
77		>sp|P10316|1A69_HUMAN HLA class I histocompatibility antigen, A-69 alpha chain OS=Homo sapiens GN=HLA-A PE=1 SV=2	Q.YAYDGKDYI.A	FALSE	9	P10316	HLA-A	class I	AML14_DCB
78		>sp|P10316|1A69_HUMAN HLA class I histocompatibility antigen, A-69 alpha chain OS=Homo sapiens GN=HLA-A PE=1 SV=2	Q.YAYDGKDYI.A	FALSE	9	P10316	HLA-A	class I	AML14_DCB
79		>sp|P10316|1A69_HUMAN HLA class I histocompatibility antigen, A-69 alpha chain OS=Homo sapiens GN=HLA-A PE=1 SV=2	Q.YAYDGKDYI.A	FALSE	9	P10316	HLA-A	class I	AML14_DCB
80		>sp|P10316|1A69_HUMAN HLA class I histocompatibility antigen, A-69 alpha chain OS=Homo sapiens GN=HLA-A PE=1 SV=2	Q.YAYDGKDYIA.L	FALSE	10	P10316	HLA-A	class I	AML14_DCB
81		>sp|P10316|1A69_HUMAN HLA class I histocompatibility antigen, A-69 alpha chain OS=Homo sapiens GN=HLA-A PE=1 SV=2	Q.YAYDGKDYIA.L	FALSE	10	P10316	HLA-A	class I	AML14_DCB
82		>sp|P10316|1A69_HUMAN HLA class I histocompatibility antigen, A-69 alpha chain OS=Homo sapiens GN=HLA-A PE=1 SV=2	Q.YAYDGKDYIA.L	FALSE	10	P10316	HLA-A	class I	AML14_DCB
83		>sp|P10316|1A69_HUMAN HLA class I histocompatibility antigen, A-69 alpha chain OS=Homo sapiens GN=HLA-A PE=1 SV=2	Q.YAYDGKDYIA.L	FALSE	10	P10316	HLA-A	class I	AML14_DCB
84		>sp|P10316|1A69_HUMAN HLA class I histocompatibility antigen, A-69 alpha chain OS=Homo sapiens GN=HLA-A PE=1 SV=2	R.YLENGKETL.Q	FALSE	9	P10316	HLA-A	class I	AML14_DCB
85		>sp|P10316|1A69_HUMAN HLA class I histocompatibility antigen, A-69 alpha chain OS=Homo sapiens GN=HLA-A PE=1 SV=2	A.VSDHEATL.R	FALSE	8	P10316	HLA-A	class I	AML14_DCB
86		>sp|P10316|1A69_HUMAN HLA class I histocompatibility antigen, A-69 alpha chain OS=Homo sapiens GN=HLA-A PE=1 SV=2	A.VSDHEATL.R	FALSE	8	P10316	HLA-A	class I	AML14_DCB
87		>sp|P10316|1A69_HUMAN HLA class I histocompatibility antigen, A-69 alpha chain OS=Homo sapiens GN=HLA-A PE=1 SV=2	G.SYSQAASSDSAQGSDVSLTA.C	FALSE	20	P10316	HLA-A	class I	AML14_DCB
88		>sp|P10316|1A69_HUMAN HLA class I histocompatibility antigen, A-69 alpha chain OS=Homo sapiens GN=HLA-A PE=1 SV=2	G.SYSQAASSDSAQGSDVSLTA.C	FALSE	20	P10316	HLA-A	class I	AML14_DCB
89		>sp|P10316|1A69_HUMAN HLA class I histocompatibility antigen, A-69 alpha chain OS=Homo sapiens GN=HLA-A PE=1 SV=2	A.ASSDSAQGSDVSLTA.C	FALSE	15	P10316	HLA-A	class I	AML14_DCB
90		>sp|P10316|1A69_HUMAN HLA class I histocompatibility antigen, A-69 alpha chain OS=Homo sapiens GN=HLA-A PE=1 SV=2	A.SSDSAQGSDVSLTA.C	FALSE	14	P10316	HLA-A	class I	AML14_DCB
91		>sp|P10316|1A69_HUMAN HLA class I histocompatibility antigen, A-69 alpha chain OS=Homo sapiens GN=HLA-A PE=1 SV=2	S.SDSAQGSDVSLTA.C	FALSE	13	P10316	HLA-A	class I	AML14_DCB
92		>sp|P10316|1A69_HUMAN HLA class I histocompatibility antigen, A-69 alpha chain OS=Homo sapiens GN=HLA-A PE=1 SV=2	D.SAQGSDVSLTA.C	FALSE	11	P10316	HLA-A	class I	AML14_DCB
93		>sp|P10316|1A69_HUMAN HLA class I histocompatibility antigen, A-69 alpha chain OS=Homo sapiens GN=HLA-A PE=1 SV=2	D.SAQGSDVSLTA.C	FALSE	11	P10316	HLA-A	class I	AML14_DCB
94		>sp|P10316|1A69_HUMAN HLA class I histocompatibility antigen, A-69 alpha chain OS=Homo sapiens GN=HLA-A PE=1 SV=2	Q.GSDVSLTA.C	FALSE	8	P10316	HLA-A	class I	AML14_DCB
95		>sp|P04075|ALDOA_HUMAN Fructose-bisphosphate aldolase A OS=Homo sapiens GN=ALDOA PE=1 SV=2	M.PYQYPALTPEQK.K	FALSE	12	P04075	ALDOA	class I	AML14_DCB
96		>sp|P04075|ALDOA_HUMAN Fructose-bisphosphate aldolase A OS=Homo sapiens GN=ALDOA PE=1 SV=2	K.ELSDIAHR.I	FALSE	8	P04075	ALDOA	class I	AML14_DCB
97		>sp|P04075|ALDOA_HUMAN Fructose-bisphosphate aldolase A OS=Homo sapiens GN=ALDOA PE=1 SV=2	K.ELSDIAHR.I	FALSE	8	P04075	ALDOA	class I	AML14_DCB
98		>sp|P04075|ALDOA_HUMAN Fructose-bisphosphate aldolase A OS=Homo sapiens GN=ALDOA PE=1 SV=2	R.LQSIGTENTEENRR.F	FALSE	14	P04075	ALDOA	class I	AML14_DCB
99		>sp|P04075|ALDOA_HUMAN Fructose-bisphosphate aldolase A OS=Homo sapiens GN=ALDOA PE=1 SV=2	G.TENTEENRRF.Y	FALSE	10	P04075	ALDOA	class I	AML14_DCB
100		>sp|P04075|ALDOA_HUMAN Fructose-bisphosphate aldolase A OS=Homo sapiens GN=ALDOA PE=1 SV=2	G.TENTEENRRF.Y	FALSE	10	P04075	ALDOA	class I	AML14_DCB
101		>sp|P04075|ALDOA_HUMAN Fructose-bisphosphate aldolase A OS=Homo sapiens GN=ALDOA PE=1 SV=2	G.TENTEENRRFY.R	FALSE	11	P04075	ALDOA	class I	AML14_DCB
102		>sp|P04075|ALDOA_HUMAN Fructose-bisphosphate aldolase A OS=Homo sapiens GN=ALDOA PE=1 SV=2	G.TENTEENRRFY.R	FALSE	11	P04075	ALDOA	class I	AML14_DCB
103		>sp|P04075|ALDOA_HUMAN Fructose-bisphosphate aldolase A OS=Homo sapiens GN=ALDOA PE=1 SV=2	G.TENTEENRRFY.R	FALSE	11	P04075	ALDOA	class I	AML14_DCB
104		>sp|P04075|ALDOA_HUMAN Fructose-bisphosphate aldolase A OS=Homo sapiens GN=ALDOA PE=1 SV=2	K.ADDGRPFPQVIK.S	FALSE	12	P04075	ALDOA	class I	AML14_DCB
105		>sp|P04075|ALDOA_HUMAN Fructose-bisphosphate aldolase A OS=Homo sapiens GN=ALDOA PE=1 SV=2	K.ALSDHHIYL.E	FALSE	9	P04075	ALDOA	class I	AML14_DCB
106		>sp|P04075|ALDOA_HUMAN Fructose-bisphosphate aldolase A OS=Homo sapiens GN=ALDOA PE=1 SV=2	K.ALSDHHIYL.E	FALSE	9	P04075	ALDOA	class I	AML14_DCB
107		>sp|P04075|ALDOA_HUMAN Fructose-bisphosphate aldolase A OS=Homo sapiens GN=ALDOA PE=1 SV=2	K.ALSDHHIYL.E	FALSE	9	P04075	ALDOA	class I	AML14_DCB
108		>sp|P04075|ALDOA_HUMAN Fructose-bisphosphate aldolase A OS=Homo sapiens GN=ALDOA PE=1 SV=2	K.ALSDHHIYL.E	FALSE	9	P04075	ALDOA	class I	AML14_DCB
109		>sp|P04075|ALDOA_HUMAN Fructose-bisphosphate aldolase A OS=Homo sapiens GN=ALDOA PE=1 SV=2	K.ALSDHHIYL.E	FALSE	9	P04075	ALDOA	class I	AML14_DCB
110		>sp|P04075|ALDOA_HUMAN Fructose-bisphosphate aldolase A OS=Homo sapiens GN=ALDOA PE=1 SV=2	K.ALSDHHIYL.E	FALSE	9	P04075	ALDOA	class I	AML14_DCB
111		>sp|P04075|ALDOA_HUMAN Fructose-bisphosphate aldolase A OS=Homo sapiens GN=ALDOA PE=1 SV=2	A.LSDHHIYL.E	FALSE	8	P04075	ALDOA	class I	AML14_DCB
112		>sp|P04075|ALDOA_HUMAN Fructose-bisphosphate aldolase A OS=Homo sapiens GN=ALDOA PE=1 SV=2	A.LSDHHIYL.E	FALSE	8	P04075	ALDOA	class I	AML14_DCB
113		>sp|P04075|ALDOA_HUMAN Fructose-bisphosphate aldolase A OS=Homo sapiens GN=ALDOA PE=1 SV=2	T.VPPAVTGI.T	FALSE	8	P04075	ALDOA	class I	AML14_DCB
114		>sp|P04075|ALDOA_HUMAN Fructose-bisphosphate aldolase A OS=Homo sapiens GN=ALDOA PE=1 SV=2	G.RALQASALKAW.G	FALSE	11	P04075	ALDOA	class I	AML14_DCB
115		>sp|P04075|ALDOA_HUMAN Fructose-bisphosphate aldolase A OS=Homo sapiens GN=ALDOA PE=1 SV=2	K.AAQEEYVK.R	FALSE	8	P04075	ALDOA	class I	AML14_DCB
116		>sp|P04075|ALDOA_HUMAN Fructose-bisphosphate aldolase A OS=Homo sapiens GN=ALDOA PE=1 SV=2	A.SESLFVSNHAY.-	FALSE	11	P04075	ALDOA	class I	AML14_DCB
117		>sp|P04075|ALDOA_HUMAN Fructose-bisphosphate aldolase A OS=Homo sapiens GN=ALDOA PE=1 SV=2	A.SESLFVSNHAY.-	FALSE	11	P04075	ALDOA	class I	AML14_DCB
118		>sp|P08670|VIME_HUMAN Vimentin OS=Homo sapiens GN=VIM PE=1 SV=4	R.SYVTTSTR.T	FALSE	8	P08670	VIM	class I	AML14_DCB
119		>sp|P08670|VIME_HUMAN Vimentin OS=Homo sapiens GN=VIM PE=1 SV=4	R.TYSLGSAL.R	FALSE	8	P08670	VIM	class I	AML14_DCB
120		>sp|P08670|VIME_HUMAN Vimentin OS=Homo sapiens GN=VIM PE=1 SV=4	S.LADAINTEF.K	FALSE	9	P08670	VIM	class I	AML14_DCB
121		>sp|P08670|VIME_HUMAN Vimentin OS=Homo sapiens GN=VIM PE=1 SV=4	K.VRFLEQQNK.I	FALSE	9	P08670	VIM	class I	AML14_DCB
122		>sp|P08670|VIME_HUMAN Vimentin OS=Homo sapiens GN=VIM PE=1 SV=4	R.RQVDQLTNDK.A	FALSE	10	P08670	VIM	class I	AML14_DCB
123		>sp|P08670|VIME_HUMAN Vimentin OS=Homo sapiens GN=VIM PE=1 SV=4	R.RQVDQLTNDK.A	FALSE	10	P08670	VIM	class I	AML14_DCB
124		>sp|P08670|VIME_HUMAN Vimentin OS=Homo sapiens GN=VIM PE=1 SV=4	R.RQVDQLTNDK.A	FALSE	10	P08670	VIM	class I	AML14_DCB
125		>sp|P08670|VIME_HUMAN Vimentin OS=Homo sapiens GN=VIM PE=1 SV=4	D.NLAEDIMRL.R	FALSE	9	P08670	VIM	class I	AML14_DCB
126		>sp|P08670|VIME_HUMAN Vimentin OS=Homo sapiens GN=VIM PE=1 SV=4	Q.EEIAFLKKL.H	FALSE	9	P08670	VIM	class I	AML14_DCB
127		>sp|P08670|VIME_HUMAN Vimentin OS=Homo sapiens GN=VIM PE=1 SV=4	A.ALRDVRQQY.E	FALSE	9	P08670	VIM	class I	AML14_DCB
128		>sp|P08670|VIME_HUMAN Vimentin OS=Homo sapiens GN=VIM PE=1 SV=4	A.ALRDVRQQY.E	FALSE	9	P08670	VIM	class I	AML14_DCB
129		>sp|P08670|VIME_HUMAN Vimentin OS=Homo sapiens GN=VIM PE=1 SV=4	R.DVRQQYESV.A	FALSE	9	P08670	VIM	class I	AML14_DCB
130		>sp|P08670|VIME_HUMAN Vimentin OS=Homo sapiens GN=VIM PE=1 SV=4	R.QQYESVAAK.N	FALSE	9	P08670	VIM	class I	AML14_DCB
131		>sp|P08670|VIME_HUMAN Vimentin OS=Homo sapiens GN=VIM PE=1 SV=4	K.FADLSEAANR.N	FALSE	10	P08670	VIM	class I	AML14_DCB
132		>sp|P08670|VIME_HUMAN Vimentin OS=Homo sapiens GN=VIM PE=1 SV=4	K.FADLSEAANRNNDALR.Q	FALSE	16	P08670	VIM	class I	AML14_DCB
133		>sp|P08670|VIME_HUMAN Vimentin OS=Homo sapiens GN=VIM PE=1 SV=4	K.GTNESLER.Q	FALSE	8	P08670	VIM	class I	AML14_DCB
134		>sp|P08670|VIME_HUMAN Vimentin OS=Homo sapiens GN=VIM PE=1 SV=4	K.GTNESLER.Q	FALSE	8	P08670	VIM	class I	AML14_DCB
135		>sp|P08670|VIME_HUMAN Vimentin OS=Homo sapiens GN=VIM PE=1 SV=4	R.KLLEGEESRISL.P	FALSE	12	P08670	VIM	class I	AML14_DCB
136		>sp|P08670|VIME_HUMAN Vimentin OS=Homo sapiens GN=VIM PE=1 SV=4	R.KLLEGEESRISL.P	FALSE	12	P08670	VIM	class I	AML14_DCB
137		>sp|P08670|VIME_HUMAN Vimentin OS=Homo sapiens GN=VIM PE=1 SV=4	R.KLLEGEESRISL.P	FALSE	12	P08670	VIM	class I	AML14_DCB
138		>sp|P08670|VIME_HUMAN Vimentin OS=Homo sapiens GN=VIM PE=1 SV=4	K.LLEGEESR.I	FALSE	8	P08670	VIM	class I	AML14_DCB
139		>sp|P08670|VIME_HUMAN Vimentin OS=Homo sapiens GN=VIM PE=1 SV=4	R.DGQVINETSQHHDDLE.-	FALSE	16	P08670	VIM	class I	AML14_DCB
140		>sp|P08670|VIME_HUMAN Vimentin OS=Homo sapiens GN=VIM PE=1 SV=4	R.DGQVINETSQHHDDLE.-	FALSE	16	P08670	VIM	class I	AML14_DCB
141		>sp|P63261|ACTG_HUMAN Actin, cytoplasmic 2 OS=Homo sapiens GN=ACTG1 PE=1 SV=1	K.AGFAGDDAPR.A	FALSE	10	P63261	ACTG1	class I	AML14_DCB
142		>sp|P63261|ACTG_HUMAN Actin, cytoplasmic 2 OS=Homo sapiens GN=ACTG1 PE=1 SV=1	K.AGFAGDDAPR.A	FALSE	10	P63261	ACTG1	class I	AML14_DCB
143		>sp|P63261|ACTG_HUMAN Actin, cytoplasmic 2 OS=Homo sapiens GN=ACTG1 PE=1 SV=1	F.AGDDAPRAV.F	FALSE	9	P63261	ACTG1	class I	AML14_DCB
144		>sp|P63261|ACTG_HUMAN Actin, cytoplasmic 2 OS=Homo sapiens GN=ACTG1 PE=1 SV=1	R.AVFPSIVGRPR.H	FALSE	11	P63261	ACTG1	class I	AML14_DCB
145		>sp|P63261|ACTG_HUMAN Actin, cytoplasmic 2 OS=Homo sapiens GN=ACTG1 PE=1 SV=1	R.AVFPSIVGRPR.H	FALSE	11	P63261	ACTG1	class I	AML14_DCB
146		>sp|P63261|ACTG_HUMAN Actin, cytoplasmic 2 OS=Homo sapiens GN=ACTG1 PE=1 SV=1	K.DSYVGDEAQSK.R	FALSE	11	P63261	ACTG1	class I	AML14_DCB
147		>sp|P63261|ACTG_HUMAN Actin, cytoplasmic 2 OS=Homo sapiens GN=ACTG1 PE=1 SV=1	K.DSYVGDEAQSK.R	FALSE	11	P63261	ACTG1	class I	AML14_DCB
148		>sp|P63261|ACTG_HUMAN Actin, cytoplasmic 2 OS=Homo sapiens GN=ACTG1 PE=1 SV=1	R.VAPEEHPVLLTEAPLNPK.A	FALSE	18	P63261	ACTG1	class I	AML14_DCB
149		>sp|P63261|ACTG_HUMAN Actin, cytoplasmic 2 OS=Homo sapiens GN=ACTG1 PE=1 SV=1	R.VAPEEHPVLLTEAPLNPK.A	FALSE	18	P63261	ACTG1	class I	AML14_DCB
150		>sp|P63261|ACTG_HUMAN Actin, cytoplasmic 2 OS=Homo sapiens GN=ACTG1 PE=1 SV=1	R.VAPEEHPVLLTEAPLNPK.A	FALSE	18	P63261	ACTG1	class I	AML14_DCB
151		>sp|P63261|ACTG_HUMAN Actin, cytoplasmic 2 OS=Homo sapiens GN=ACTG1 PE=1 SV=1	L.TEAPLNPK.A	FALSE	8	P63261	ACTG1	class I	AML14_DCB
152		>sp|P63261|ACTG_HUMAN Actin, cytoplasmic 2 OS=Homo sapiens GN=ACTG1 PE=1 SV=1	R.GYSFTTTAER.E	FALSE	10	P63261	ACTG1	class I	AML14_DCB
153		>sp|P63261|ACTG_HUMAN Actin, cytoplasmic 2 OS=Homo sapiens GN=ACTG1 PE=1 SV=1	M.ATAASSSSLEK.S	FALSE	11	P63261	ACTG1	class I	AML14_DCB
154		>sp|P63261|ACTG_HUMAN Actin, cytoplasmic 2 OS=Homo sapiens GN=ACTG1 PE=1 SV=1	K.SYELPDGQVITIGNER.F	FALSE	16	P63261	ACTG1	class I	AML14_DCB
155		>sp|P63261|ACTG_HUMAN Actin, cytoplasmic 2 OS=Homo sapiens GN=ACTG1 PE=1 SV=1	E.LPDGQVITI.G	FALSE	9	P63261	ACTG1	class I	AML14_DCB
156		>sp|P63261|ACTG_HUMAN Actin, cytoplasmic 2 OS=Homo sapiens GN=ACTG1 PE=1 SV=1	K.IIAPPERK.Y	FALSE	8	P63261	ACTG1	class I	AML14_DCB
157		>sp|P63261|ACTG_HUMAN Actin, cytoplasmic 2 OS=Homo sapiens GN=ACTG1 PE=1 SV=1	K.IIAPPERK.Y	FALSE	8	P63261	ACTG1	class I	AML14_DCB
158		>sp|P11142|HSP7C_HUMAN Heat shock cognate 71 kDa protein OS=Homo sapiens GN=HSPA8 PE=1 SV=1	K.VEIIANDQGNR.T	FALSE	11	P11142	HSPA8	class I	AML14_DCB
159		>sp|P11142|HSP7C_HUMAN Heat shock cognate 71 kDa protein OS=Homo sapiens GN=HSPA8 PE=1 SV=1	R.TTPSYVAFTDTER.L	FALSE	13	P11142	HSPA8	class I	AML14_DCB
160		>sp|P11142|HSP7C_HUMAN Heat shock cognate 71 kDa protein OS=Homo sapiens GN=HSPA8 PE=1 SV=1	R.TTPSYVAFTDTER.L	FALSE	13	P11142	HSPA8	class I	AML14_DCB
161		>sp|P11142|HSP7C_HUMAN Heat shock cognate 71 kDa protein OS=Homo sapiens GN=HSPA8 PE=1 SV=1	E.RLIGDAAKNQV.A	FALSE	11	P11142	HSPA8	class I	AML14_DCB
162		>sp|P11142|HSP7C_HUMAN Heat shock cognate 71 kDa protein OS=Homo sapiens GN=HSPA8 PE=1 SV=1	K.VQVEYKGETK.S	FALSE	10	P11142	HSPA8	class I	AML14_DCB
163		>sp|P11142|HSP7C_HUMAN Heat shock cognate 71 kDa protein OS=Homo sapiens GN=HSPA8 PE=1 SV=1	K.VQVEYKGETK.S	FALSE	10	P11142	HSPA8	class I	AML14_DCB
164		>sp|P11142|HSP7C_HUMAN Heat shock cognate 71 kDa protein OS=Homo sapiens GN=HSPA8 PE=1 SV=1	A.EAYLGKTV.T	FALSE	8	P11142	HSPA8	class I	AML14_DCB
165		>sp|P11142|HSP7C_HUMAN Heat shock cognate 71 kDa protein OS=Homo sapiens GN=HSPA8 PE=1 SV=1	A.EAYLGKTV.T	FALSE	8	P11142	HSPA8	class I	AML14_DCB
166		>sp|P11142|HSP7C_HUMAN Heat shock cognate 71 kDa protein OS=Homo sapiens GN=HSPA8 PE=1 SV=1	A.EAYLGKTV.T	FALSE	8	P11142	HSPA8	class I	AML14_DCB
167		>sp|P11142|HSP7C_HUMAN Heat shock cognate 71 kDa protein OS=Homo sapiens GN=HSPA8 PE=1 SV=1	A.EAYLGKTV.T	FALSE	8	P11142	HSPA8	class I	AML14_DCB
168		>sp|P11142|HSP7C_HUMAN Heat shock cognate 71 kDa protein OS=Homo sapiens GN=HSPA8 PE=1 SV=1	R.GTLDPVEK.A	FALSE	8	P11142	HSPA8	class I	AML14_DCB
169		>sp|P11142|HSP7C_HUMAN Heat shock cognate 71 kDa protein OS=Homo sapiens GN=HSPA8 PE=1 SV=1	R.DAKLDKSQI.H	FALSE	9	P11142	HSPA8	class I	AML14_DCB
170		>sp|P11142|HSP7C_HUMAN Heat shock cognate 71 kDa protein OS=Homo sapiens GN=HSPA8 PE=1 SV=1	R.DAKLDKSQI.H	FALSE	9	P11142	HSPA8	class I	AML14_DCB
171		>sp|P11142|HSP7C_HUMAN Heat shock cognate 71 kDa protein OS=Homo sapiens GN=HSPA8 PE=1 SV=1	K.RNTTIPTK.Q	FALSE	8	P11142	HSPA8	class I	AML14_DCB
172		>sp|P11142|HSP7C_HUMAN Heat shock cognate 71 kDa protein OS=Homo sapiens GN=HSPA8 PE=1 SV=1	K.RNTTIPTK.Q	FALSE	8	P11142	HSPA8	class I	AML14_DCB
173		>sp|P11142|HSP7C_HUMAN Heat shock cognate 71 kDa protein OS=Homo sapiens GN=HSPA8 PE=1 SV=1	S.YAFNMKATV.E	FALSE	9	P11142	HSPA8	class I	AML14_DCB
174		>sp|P11142|HSP7C_HUMAN Heat shock cognate 71 kDa protein OS=Homo sapiens GN=HSPA8 PE=1 SV=1	S.YAFNMKATV.E	FALSE	9	P11142	HSPA8	class I	AML14_DCB
175		>sp|P11142|HSP7C_HUMAN Heat shock cognate 71 kDa protein OS=Homo sapiens GN=HSPA8 PE=1 SV=1	S.YAFNMKATV.E	FALSE	9	P11142	HSPA8	class I	AML14_DCB
176		>sp|P11142|HSP7C_HUMAN Heat shock cognate 71 kDa protein OS=Homo sapiens GN=HSPA8 PE=1 SV=1	S.YAFNMKATV.E	FALSE	9	P11142	HSPA8	class I	AML14_DCB
177		>sp|P11142|HSP7C_HUMAN Heat shock cognate 71 kDa protein OS=Homo sapiens GN=HSPA8 PE=1 SV=1	S.YAFNMKATV.E	FALSE	9	P11142	HSPA8	class I	AML14_DCB
178	M[+16]	>sp|P11142|HSP7C_HUMAN Heat shock cognate 71 kDa protein OS=Homo sapiens GN=HSPA8 PE=1 SV=1	S.YAFNM[+15.995]KATV.E	FALSE	9	P11142	HSPA8	class I	AML14_DCB
179	M[+16]	>sp|P11142|HSP7C_HUMAN Heat shock cognate 71 kDa protein OS=Homo sapiens GN=HSPA8 PE=1 SV=1	S.YAFNM[+15.995]KATV.E	FALSE	9	P11142	HSPA8	class I	AML14_DCB
180	M[+16]	>sp|P11142|HSP7C_HUMAN Heat shock cognate 71 kDa protein OS=Homo sapiens GN=HSPA8 PE=1 SV=1	S.YAFNM[+15.995]KATV.E	FALSE	9	P11142	HSPA8	class I	AML14_DCB
181		>sp|P11142|HSP7C_HUMAN Heat shock cognate 71 kDa protein OS=Homo sapiens GN=HSPA8 PE=1 SV=1	Y.AFNMKATV.E	FALSE	8	P11142	HSPA8	class I	AML14_DCB
182		>sp|P11142|HSP7C_HUMAN Heat shock cognate 71 kDa protein OS=Homo sapiens GN=HSPA8 PE=1 SV=1	K.NQTAEKEEFEHQQK.E	FALSE	14	P11142	HSPA8	class I	AML14_DCB
183		>sp|P11142|HSP7C_HUMAN Heat shock cognate 71 kDa protein OS=Homo sapiens GN=HSPA8 PE=1 SV=1	K.EEFEHQQK.E	FALSE	8	P11142	HSPA8	class I	AML14_DCB
184		>sp|P11142|HSP7C_HUMAN Heat shock cognate 71 kDa protein OS=Homo sapiens GN=HSPA8 PE=1 SV=1	K.EEFEHQQK.E	FALSE	8	P11142	HSPA8	class I	AML14_DCB
185		>sp|Q15155|NOMO1_HUMAN Nodal modulator 1 OS=Homo sapiens GN=NOMO1 PE=1 SV=5	I.KIAPNTPQL.A	FALSE	9	Q15155	NOMO1	class I	AML14_DCB
186		>sp|Q15155|NOMO1_HUMAN Nodal modulator 1 OS=Homo sapiens GN=NOMO1 PE=1 SV=5	I.KIAPNTPQL.A	FALSE	9	Q15155	NOMO1	class I	AML14_DCB
187		>sp|Q15155|NOMO1_HUMAN Nodal modulator 1 OS=Homo sapiens GN=NOMO1 PE=1 SV=5	I.KIAPNTPQL.A	FALSE	9	Q15155	NOMO1	class I	AML14_DCB
188		>sp|Q15155|NOMO1_HUMAN Nodal modulator 1 OS=Homo sapiens GN=NOMO1 PE=1 SV=5	I.KIAPNTPQL.A	FALSE	9	Q15155	NOMO1	class I	AML14_DCB
189		>sp|Q15155|NOMO1_HUMAN Nodal modulator 1 OS=Homo sapiens GN=NOMO1 PE=1 SV=5	I.RFPDTVKQM.N	FALSE	9	Q15155	NOMO1	class I	AML14_DCB
190		>sp|Q15155|NOMO1_HUMAN Nodal modulator 1 OS=Homo sapiens GN=NOMO1 PE=1 SV=5	G.KVNAMTFTF.D	FALSE	9	Q15155	NOMO1	class I	AML14_DCB
191		>sp|Q15155|NOMO1_HUMAN Nodal modulator 1 OS=Homo sapiens GN=NOMO1 PE=1 SV=5	G.KVNAMTFTF.D	FALSE	9	Q15155	NOMO1	class I	AML14_DCB
192		>sp|Q15155|NOMO1_HUMAN Nodal modulator 1 OS=Homo sapiens GN=NOMO1 PE=1 SV=5	G.KVNAMTFTF.D	FALSE	9	Q15155	NOMO1	class I	AML14_DCB
193	M[+16]	>sp|Q15155|NOMO1_HUMAN Nodal modulator 1 OS=Homo sapiens GN=NOMO1 PE=1 SV=5	G.KVNAM[+15.995]TFTF.D	FALSE	9	Q15155	NOMO1	class I	AML14_DCB
194		>sp|Q15155|NOMO1_HUMAN Nodal modulator 1 OS=Homo sapiens GN=NOMO1 PE=1 SV=5	D.KMMDVTVTI.K	FALSE	9	Q15155	NOMO1	class I	AML14_DCB
195		>sp|Q15155|NOMO1_HUMAN Nodal modulator 1 OS=Homo sapiens GN=NOMO1 PE=1 SV=5	D.KMMDVTVTI.K	FALSE	9	Q15155	NOMO1	class I	AML14_DCB
196		>sp|Q15155|NOMO1_HUMAN Nodal modulator 1 OS=Homo sapiens GN=NOMO1 PE=1 SV=5	D.KMMDVTVTI.K	FALSE	9	Q15155	NOMO1	class I	AML14_DCB
197	M[+16]	>sp|Q15155|NOMO1_HUMAN Nodal modulator 1 OS=Homo sapiens GN=NOMO1 PE=1 SV=5	D.KM[+15.995]MDVTVTI.K	FALSE	9	Q15155	NOMO1	class I	AML14_DCB
198		>sp|Q15155|NOMO1_HUMAN Nodal modulator 1 OS=Homo sapiens GN=NOMO1 PE=1 SV=5	F.YPPSMEAVV.S	FALSE	9	Q15155	NOMO1	class I	AML14_DCB
199		>sp|Q15155|NOMO1_HUMAN Nodal modulator 1 OS=Homo sapiens GN=NOMO1 PE=1 SV=5	Y.ALAGVSFEI.K	FALSE	9	Q15155	NOMO1	class I	AML14_DCB
200		>sp|Q15155|NOMO1_HUMAN Nodal modulator 1 OS=Homo sapiens GN=NOMO1 PE=1 SV=5	Y.ALAGVSFEI.K	FALSE	9	Q15155	NOMO1	class I	AML14_DCB
201		>sp|Q15155|NOMO1_HUMAN Nodal modulator 1 OS=Homo sapiens GN=NOMO1 PE=1 SV=5	A.LPHHRVIEV.G	FALSE	9	Q15155	NOMO1	class I	AML14_DCB
202		>sp|Q15155|NOMO1_HUMAN Nodal modulator 1 OS=Homo sapiens GN=NOMO1 PE=1 SV=5	A.LPHHRVIEV.G	FALSE	9	Q15155	NOMO1	class I	AML14_DCB
203		>sp|Q15155|NOMO1_HUMAN Nodal modulator 1 OS=Homo sapiens GN=NOMO1 PE=1 SV=5	A.LPHHRVIEV.G	FALSE	9	Q15155	NOMO1	class I	AML14_DCB
204		>sp|Q15155|NOMO1_HUMAN Nodal modulator 1 OS=Homo sapiens GN=NOMO1 PE=1 SV=5	A.LPHHRVIEV.G	FALSE	9	Q15155	NOMO1	class I	AML14_DCB
205		>sp|Q15155|NOMO1_HUMAN Nodal modulator 1 OS=Homo sapiens GN=NOMO1 PE=1 SV=5	A.LPHHRVIEV.G	FALSE	9	Q15155	NOMO1	class I	AML14_DCB
206		>sp|Q15155|NOMO1_HUMAN Nodal modulator 1 OS=Homo sapiens GN=NOMO1 PE=1 SV=5	A.LPHHRVIEV.G	FALSE	9	Q15155	NOMO1	class I	AML14_DCB
207		>sp|Q15155|NOMO1_HUMAN Nodal modulator 1 OS=Homo sapiens GN=NOMO1 PE=1 SV=5	L.PHHRVIEV.G	FALSE	8	Q15155	NOMO1	class I	AML14_DCB
208		>sp|Q15155|NOMO1_HUMAN Nodal modulator 1 OS=Homo sapiens GN=NOMO1 PE=1 SV=5	L.PHHRVIEV.G	FALSE	8	Q15155	NOMO1	class I	AML14_DCB
209		>sp|Q15155|NOMO1_HUMAN Nodal modulator 1 OS=Homo sapiens GN=NOMO1 PE=1 SV=5	E.NLDNPIQTV.S	FALSE	9	Q15155	NOMO1	class I	AML14_DCB
210	.[+42]	>sp|P06454|PTMA_HUMAN Prothymosin alpha OS=Homo sapiens GN=PTMA PE=1 SV=2	M.[+42.011]SDAAVDTSSEITTK.D	FALSE	14	P06454	PTMA	class I	AML14_DCB
211	.[+42]	>sp|P06454|PTMA_HUMAN Prothymosin alpha OS=Homo sapiens GN=PTMA PE=1 SV=2	M.[+42.011]SDAAVDTSSEITTK.D	FALSE	14	P06454	PTMA	class I	AML14_DCB
212	.[+42]	>sp|P06454|PTMA_HUMAN Prothymosin alpha OS=Homo sapiens GN=PTMA PE=1 SV=2	M.[+42.011]SDAAVDTSSEITTKD.L	FALSE	15	P06454	PTMA	class I	AML14_DCB
213	.[+42]	>sp|P06454|PTMA_HUMAN Prothymosin alpha OS=Homo sapiens GN=PTMA PE=1 SV=2	M.[+42.011]SDAAVDTSSEITTKDLK.E	FALSE	17	P06454	PTMA	class I	AML14_DCB
214		>sp|P06454|PTMA_HUMAN Prothymosin alpha OS=Homo sapiens GN=PTMA PE=1 SV=2	K.EVVEEAENGR.D	FALSE	10	P06454	PTMA	class I	AML14_DCB
215		>sp|P06454|PTMA_HUMAN Prothymosin alpha OS=Homo sapiens GN=PTMA PE=1 SV=2	K.RAAEDDEDDDVDTK.K	FALSE	14	P06454	PTMA	class I	AML14_DCB
216		>sp|P06454|PTMA_HUMAN Prothymosin alpha OS=Homo sapiens GN=PTMA PE=1 SV=2	K.RAAEDDEDDDVDTK.K	FALSE	14	P06454	PTMA	class I	AML14_DCB
217		>sp|P06454|PTMA_HUMAN Prothymosin alpha OS=Homo sapiens GN=PTMA PE=1 SV=2	K.RAAEDDEDDDVDTKK.Q	FALSE	15	P06454	PTMA	class I	AML14_DCB
218		>sp|P09874|PARP1_HUMAN Poly [ADP-ribose] polymerase 1 OS=Homo sapiens GN=PARP1 PE=1 SV=4	R.EELGFRPEY.S	FALSE	9	P09874	PARP1	class I	AML14_DCB
219		>sp|P09874|PARP1_HUMAN Poly [ADP-ribose] polymerase 1 OS=Homo sapiens GN=PARP1 PE=1 SV=4	I.FPPETSASV.A	FALSE	9	P09874	PARP1	class I	AML14_DCB
220		>sp|P09874|PARP1_HUMAN Poly [ADP-ribose] polymerase 1 OS=Homo sapiens GN=PARP1 PE=1 SV=4	M.KLYEEKTGNAW.H	FALSE	11	P09874	PARP1	class I	AML14_DCB
221		>sp|P09874|PARP1_HUMAN Poly [ADP-ribose] polymerase 1 OS=Homo sapiens GN=PARP1 PE=1 SV=4	M.KLYEEKTGNAW.H	FALSE	11	P09874	PARP1	class I	AML14_DCB
222		>sp|P09874|PARP1_HUMAN Poly [ADP-ribose] polymerase 1 OS=Homo sapiens GN=PARP1 PE=1 SV=4	Y.EEKTGNAW.H	FALSE	8	P09874	PARP1	class I	AML14_DCB
223		>sp|P09874|PARP1_HUMAN Poly [ADP-ribose] polymerase 1 OS=Homo sapiens GN=PARP1 PE=1 SV=4	S.ILSEVQQAV.S	FALSE	9	P09874	PARP1	class I	AML14_DCB
224		>sp|P09874|PARP1_HUMAN Poly [ADP-ribose] polymerase 1 OS=Homo sapiens GN=PARP1 PE=1 SV=4	S.ILSEVQQAV.S	FALSE	9	P09874	PARP1	class I	AML14_DCB
225		>sp|P09874|PARP1_HUMAN Poly [ADP-ribose] polymerase 1 OS=Homo sapiens GN=PARP1 PE=1 SV=4	D.SEEAEIIRKY.V	FALSE	10	P09874	PARP1	class I	AML14_DCB
226		>sp|P09874|PARP1_HUMAN Poly [ADP-ribose] polymerase 1 OS=Homo sapiens GN=PARP1 PE=1 SV=4	D.SEEAEIIRKY.V	FALSE	10	P09874	PARP1	class I	AML14_DCB
227		>sp|P09874|PARP1_HUMAN Poly [ADP-ribose] polymerase 1 OS=Homo sapiens GN=PARP1 PE=1 SV=4	S.EEAEIIRKY.V	FALSE	9	P09874	PARP1	class I	AML14_DCB
228		>sp|P09874|PARP1_HUMAN Poly [ADP-ribose] polymerase 1 OS=Homo sapiens GN=PARP1 PE=1 SV=4	S.EEAEIIRKY.V	FALSE	9	P09874	PARP1	class I	AML14_DCB
229		>sp|P09874|PARP1_HUMAN Poly [ADP-ribose] polymerase 1 OS=Homo sapiens GN=PARP1 PE=1 SV=4	S.EEAEIIRKY.V	FALSE	9	P09874	PARP1	class I	AML14_DCB
230		>sp|P09874|PARP1_HUMAN Poly [ADP-ribose] polymerase 1 OS=Homo sapiens GN=PARP1 PE=1 SV=4	S.EEAEIIRKY.V	FALSE	9	P09874	PARP1	class I	AML14_DCB
231		>sp|P21333|FLNA_HUMAN Filamin-A OS=Homo sapiens GN=FLNA PE=1 SV=4	G.VPIPRSPYTV.T	FALSE	10	P21333	FLNA	class I	AML14_DCB
232		>sp|P21333|FLNA_HUMAN Filamin-A OS=Homo sapiens GN=FLNA PE=1 SV=4	V.KETADFKVY.T	FALSE	9	P21333	FLNA	class I	AML14_DCB
233		>sp|P21333|FLNA_HUMAN Filamin-A OS=Homo sapiens GN=FLNA PE=1 SV=4	V.KETADFKVY.T	FALSE	9	P21333	FLNA	class I	AML14_DCB
234		>sp|P21333|FLNA_HUMAN Filamin-A OS=Homo sapiens GN=FLNA PE=1 SV=4	G.VFREATTEF.S	FALSE	9	P21333	FLNA	class I	AML14_DCB
235		>sp|P21333|FLNA_HUMAN Filamin-A OS=Homo sapiens GN=FLNA PE=1 SV=4	H.IQDNHDGTYTV.A	FALSE	11	P21333	FLNA	class I	AML14_DCB
236		>sp|P21333|FLNA_HUMAN Filamin-A OS=Homo sapiens GN=FLNA PE=1 SV=4	H.IQDNHDGTYTV.A	FALSE	11	P21333	FLNA	class I	AML14_DCB
237		>sp|P21333|FLNA_HUMAN Filamin-A OS=Homo sapiens GN=FLNA PE=1 SV=4	E.IPFSPYRV.R	FALSE	8	P21333	FLNA	class I	AML14_DCB
238		>sp|P21333|FLNA_HUMAN Filamin-A OS=Homo sapiens GN=FLNA PE=1 SV=4	T.ALAGDQPSV.Q	FALSE	9	P21333	FLNA	class I	AML14_DCB
239		>sp|P21333|FLNA_HUMAN Filamin-A OS=Homo sapiens GN=FLNA PE=1 SV=4	S.AADIPINI.S	FALSE	8	P21333	FLNA	class I	AML14_DCB
240		>sp|P21333|FLNA_HUMAN Filamin-A OS=Homo sapiens GN=FLNA PE=1 SV=4	E.AEIVEGENHTY.C	FALSE	11	P21333	FLNA	class I	AML14_DCB
241		>sp|P21333|FLNA_HUMAN Filamin-A OS=Homo sapiens GN=FLNA PE=1 SV=4	E.AEIVEGENHTY.C	FALSE	11	P21333	FLNA	class I	AML14_DCB
242		>sp|P21333|FLNA_HUMAN Filamin-A OS=Homo sapiens GN=FLNA PE=1 SV=4	R.AEAGVPAEF.S	FALSE	9	P21333	FLNA	class I	AML14_DCB
243		>sp|P21333|FLNA_HUMAN Filamin-A OS=Homo sapiens GN=FLNA PE=1 SV=4	S.RLYSVSYLL.K	FALSE	9	P21333	FLNA	class I	AML14_DCB
244		>sp|P21333|FLNA_HUMAN Filamin-A OS=Homo sapiens GN=FLNA PE=1 SV=4	S.RLYSVSYLL.K	FALSE	9	P21333	FLNA	class I	AML14_DCB
245		>sp|P21333|FLNA_HUMAN Filamin-A OS=Homo sapiens GN=FLNA PE=1 SV=4	K.GEYTLVVKW.G	FALSE	9	P21333	FLNA	class I	AML14_DCB
246		>sp|P21333|FLNA_HUMAN Filamin-A OS=Homo sapiens GN=FLNA PE=1 SV=4	K.GEYTLVVKW.G	FALSE	9	P21333	FLNA	class I	AML14_DCB
247		>sp|P13639|EF2_HUMAN Elongation factor 2 OS=Homo sapiens GN=EEF2 PE=1 SV=4	S.GLHGWAFTL.K	FALSE	9	P13639	EEF2	class I	AML14_DCB
248		>sp|P13639|EF2_HUMAN Elongation factor 2 OS=Homo sapiens GN=EEF2 PE=1 SV=4	S.GLHGWAFTL.K	FALSE	9	P13639	EEF2	class I	AML14_DCB
249		>sp|P13639|EF2_HUMAN Elongation factor 2 OS=Homo sapiens GN=EEF2 PE=1 SV=4	L.KQFAEMYVAKF.A	FALSE	11	P13639	EEF2	class I	AML14_DCB
250		>sp|P13639|EF2_HUMAN Elongation factor 2 OS=Homo sapiens GN=EEF2 PE=1 SV=4	F.KVFDAIMNF.K	FALSE	9	P13639	EEF2	class I	AML14_DCB
251		>sp|P13639|EF2_HUMAN Elongation factor 2 OS=Homo sapiens GN=EEF2 PE=1 SV=4	A.KLIEKLDIKL.D	FALSE	10	P13639	EEF2	class I	AML14_DCB
252		>sp|P13639|EF2_HUMAN Elongation factor 2 OS=Homo sapiens GN=EEF2 PE=1 SV=4	A.KLIEKLDIKL.D	FALSE	10	P13639	EEF2	class I	AML14_DCB
253		>sp|P13639|EF2_HUMAN Elongation factor 2 OS=Homo sapiens GN=EEF2 PE=1 SV=4	A.KLIEKLDIKL.D	FALSE	10	P13639	EEF2	class I	AML14_DCB
254	M[+16]	>sp|P13639|EF2_HUMAN Elongation factor 2 OS=Homo sapiens GN=EEF2 PE=1 SV=4	G.DALLQM[+15.995]ITI.H	FALSE	9	P13639	EEF2	class I	AML14_DCB
255		>sp|P13639|EF2_HUMAN Elongation factor 2 OS=Homo sapiens GN=EEF2 PE=1 SV=4	N.ILTDITKGV.Q	FALSE	9	P13639	EEF2	class I	AML14_DCB
256		>sp|P13639|EF2_HUMAN Elongation factor 2 OS=Homo sapiens GN=EEF2 PE=1 SV=4	N.ILTDITKGV.Q	FALSE	9	P13639	EEF2	class I	AML14_DCB
257		>sp|P13639|EF2_HUMAN Elongation factor 2 OS=Homo sapiens GN=EEF2 PE=1 SV=4	N.ILTDITKGV.Q	FALSE	9	P13639	EEF2	class I	AML14_DCB
258		>sp|P13639|EF2_HUMAN Elongation factor 2 OS=Homo sapiens GN=EEF2 PE=1 SV=4	N.ILTDITKGV.Q	FALSE	9	P13639	EEF2	class I	AML14_DCB
259		>sp|P13639|EF2_HUMAN Elongation factor 2 OS=Homo sapiens GN=EEF2 PE=1 SV=4	N.ILTDITKGV.Q	FALSE	9	P13639	EEF2	class I	AML14_DCB
260		>sp|P13639|EF2_HUMAN Elongation factor 2 OS=Homo sapiens GN=EEF2 PE=1 SV=4	K.GLKEGIPAL.D	FALSE	9	P13639	EEF2	class I	AML14_DCB
261		>sp|P13639|EF2_HUMAN Elongation factor 2 OS=Homo sapiens GN=EEF2 PE=1 SV=4	K.GLKEGIPAL.D	FALSE	9	P13639	EEF2	class I	AML14_DCB
262		>sp|P13639|EF2_HUMAN Elongation factor 2 OS=Homo sapiens GN=EEF2 PE=1 SV=4	K.GLKEGIPAL.D	FALSE	9	P13639	EEF2	class I	AML14_DCB
263		>sp|P13639|EF2_HUMAN Elongation factor 2 OS=Homo sapiens GN=EEF2 PE=1 SV=4	K.GLKEGIPAL.D	FALSE	9	P13639	EEF2	class I	AML14_DCB
264		>sp|P48643|TCPE_HUMAN T-complex protein 1 subunit epsilon OS=Homo sapiens GN=CCT5 PE=1 SV=1	A.VANTMRTSL.G	FALSE	9	P48643	CCT5	class I	AML14_DCB
265		>sp|P48643|TCPE_HUMAN T-complex protein 1 subunit epsilon OS=Homo sapiens GN=CCT5 PE=1 SV=1	A.VANTMRTSL.G	FALSE	9	P48643	CCT5	class I	AML14_DCB
266		>sp|P48643|TCPE_HUMAN T-complex protein 1 subunit epsilon OS=Homo sapiens GN=CCT5 PE=1 SV=1	A.VANTMRTSL.G	FALSE	9	P48643	CCT5	class I	AML14_DCB
267		>sp|P48643|TCPE_HUMAN T-complex protein 1 subunit epsilon OS=Homo sapiens GN=CCT5 PE=1 SV=1	A.VANTMRTSL.G	FALSE	9	P48643	CCT5	class I	AML14_DCB
268	M[+16]	>sp|P48643|TCPE_HUMAN T-complex protein 1 subunit epsilon OS=Homo sapiens GN=CCT5 PE=1 SV=1	A.VANTM[+15.995]RTSL.G	FALSE	9	P48643	CCT5	class I	AML14_DCB
269	M[+16]	>sp|P48643|TCPE_HUMAN T-complex protein 1 subunit epsilon OS=Homo sapiens GN=CCT5 PE=1 SV=1	A.VANTM[+15.995]RTSL.G	FALSE	9	P48643	CCT5	class I	AML14_DCB
270		>sp|P48643|TCPE_HUMAN T-complex protein 1 subunit epsilon OS=Homo sapiens GN=CCT5 PE=1 SV=1	L.SMMDVDHQI.A	FALSE	9	P48643	CCT5	class I	AML14_DCB
271		>sp|P48643|TCPE_HUMAN T-complex protein 1 subunit epsilon OS=Homo sapiens GN=CCT5 PE=1 SV=1	L.SMMDVDHQI.A	FALSE	9	P48643	CCT5	class I	AML14_DCB
272	M[+16]*2	>sp|P48643|TCPE_HUMAN T-complex protein 1 subunit epsilon OS=Homo sapiens GN=CCT5 PE=1 SV=1	L.SM[+15.995]M[+15.995]DVDHQI.A	FALSE	9	P48643	CCT5	class I	AML14_DCB
273		>sp|P48643|TCPE_HUMAN T-complex protein 1 subunit epsilon OS=Homo sapiens GN=CCT5 PE=1 SV=1	A.DGYEQAARV.A	FALSE	9	P48643	CCT5	class I	AML14_DCB
274		>sp|P48643|TCPE_HUMAN T-complex protein 1 subunit epsilon OS=Homo sapiens GN=CCT5 PE=1 SV=1	A.DGYEQAARV.A	FALSE	9	P48643	CCT5	class I	AML14_DCB
275		>sp|P48643|TCPE_HUMAN T-complex protein 1 subunit epsilon OS=Homo sapiens GN=CCT5 PE=1 SV=1	A.DGYEQAARV.A	FALSE	9	P48643	CCT5	class I	AML14_DCB
276		>sp|P48643|TCPE_HUMAN T-complex protein 1 subunit epsilon OS=Homo sapiens GN=CCT5 PE=1 SV=1	A.DGYEQAARV.A	FALSE	9	P48643	CCT5	class I	AML14_DCB
277		>sp|P48643|TCPE_HUMAN T-complex protein 1 subunit epsilon OS=Homo sapiens GN=CCT5 PE=1 SV=1	A.DGYEQAARV.A	FALSE	9	P48643	CCT5	class I	AML14_DCB
278		>sp|P48643|TCPE_HUMAN T-complex protein 1 subunit epsilon OS=Homo sapiens GN=CCT5 PE=1 SV=1	E.HLDKISDSV.L	FALSE	9	P48643	CCT5	class I	AML14_DCB
279		>sp|P48643|TCPE_HUMAN T-complex protein 1 subunit epsilon OS=Homo sapiens GN=CCT5 PE=1 SV=1	R.QMAEIAVNA.V	FALSE	9	P48643	CCT5	class I	AML14_DCB
280		>sp|P55160|NCKPL_HUMAN Nck-associated protein 1-like OS=Homo sapiens GN=NCKAP1L PE=1 SV=3	H.KLAEKLTIL.N	FALSE	9	P55160	NCKAP1L	class I	AML14_DCB
281		>sp|P55160|NCKPL_HUMAN Nck-associated protein 1-like OS=Homo sapiens GN=NCKAP1L PE=1 SV=3	H.KLAEKLTIL.N	FALSE	9	P55160	NCKAP1L	class I	AML14_DCB
282		>sp|P55160|NCKPL_HUMAN Nck-associated protein 1-like OS=Homo sapiens GN=NCKAP1L PE=1 SV=3	H.KLAEKLTIL.N	FALSE	9	P55160	NCKAP1L	class I	AML14_DCB
283		>sp|P55160|NCKPL_HUMAN Nck-associated protein 1-like OS=Homo sapiens GN=NCKAP1L PE=1 SV=3	H.KLAEKLTIL.N	FALSE	9	P55160	NCKAP1L	class I	AML14_DCB
284		>sp|P55160|NCKPL_HUMAN Nck-associated protein 1-like OS=Homo sapiens GN=NCKAP1L PE=1 SV=3	D.HVYELLNTI.D	FALSE	9	P55160	NCKAP1L	class I	AML14_DCB
285		>sp|P55160|NCKPL_HUMAN Nck-associated protein 1-like OS=Homo sapiens GN=NCKAP1L PE=1 SV=3	D.HVYELLNTI.D	FALSE	9	P55160	NCKAP1L	class I	AML14_DCB
286		>sp|P55160|NCKPL_HUMAN Nck-associated protein 1-like OS=Homo sapiens GN=NCKAP1L PE=1 SV=3	D.HVYELLNTI.D	FALSE	9	P55160	NCKAP1L	class I	AML14_DCB
287		>sp|P55160|NCKPL_HUMAN Nck-associated protein 1-like OS=Homo sapiens GN=NCKAP1L PE=1 SV=3	D.HVYELLNTI.D	FALSE	9	P55160	NCKAP1L	class I	AML14_DCB
288		>sp|P55160|NCKPL_HUMAN Nck-associated protein 1-like OS=Homo sapiens GN=NCKAP1L PE=1 SV=3	L.FLLEGIRSL.V	FALSE	9	P55160	NCKAP1L	class I	AML14_DCB
289		>sp|P55160|NCKPL_HUMAN Nck-associated protein 1-like OS=Homo sapiens GN=NCKAP1L PE=1 SV=3	L.FLLEGIRSL.V	FALSE	9	P55160	NCKAP1L	class I	AML14_DCB
290		>sp|P55160|NCKPL_HUMAN Nck-associated protein 1-like OS=Homo sapiens GN=NCKAP1L PE=1 SV=3	S.RMLDSVEKL.L	FALSE	9	P55160	NCKAP1L	class I	AML14_DCB
291		>sp|P55160|NCKPL_HUMAN Nck-associated protein 1-like OS=Homo sapiens GN=NCKAP1L PE=1 SV=3	S.RMLDSVEKL.L	FALSE	9	P55160	NCKAP1L	class I	AML14_DCB
292		>sp|P55160|NCKPL_HUMAN Nck-associated protein 1-like OS=Homo sapiens GN=NCKAP1L PE=1 SV=3	S.RMLDSVEKL.L	FALSE	9	P55160	NCKAP1L	class I	AML14_DCB
293	M[+16]	>sp|P55160|NCKPL_HUMAN Nck-associated protein 1-like OS=Homo sapiens GN=NCKAP1L PE=1 SV=3	S.RM[+15.995]LDSVEKL.L	FALSE	9	P55160	NCKAP1L	class I	AML14_DCB
294	M[+16]	>sp|P55160|NCKPL_HUMAN Nck-associated protein 1-like OS=Homo sapiens GN=NCKAP1L PE=1 SV=3	S.RM[+15.995]LDSVEKL.L	FALSE	9	P55160	NCKAP1L	class I	AML14_DCB
295		>sp|P55160|NCKPL_HUMAN Nck-associated protein 1-like OS=Homo sapiens GN=NCKAP1L PE=1 SV=3	L.RIFEKMFAM.T	FALSE	9	P55160	NCKAP1L	class I	AML14_DCB
296		>sp|P55160|NCKPL_HUMAN Nck-associated protein 1-like OS=Homo sapiens GN=NCKAP1L PE=1 SV=3	L.RIFEKMFAMTL.E	FALSE	11	P55160	NCKAP1L	class I	AML14_DCB
297		>sp|P55160|NCKPL_HUMAN Nck-associated protein 1-like OS=Homo sapiens GN=NCKAP1L PE=1 SV=3	L.RIFEKMFAMTL.E	FALSE	11	P55160	NCKAP1L	class I	AML14_DCB
298		>sp|P35579|MYH9_HUMAN Myosin-9 OS=Homo sapiens GN=MYH9 PE=1 SV=4	T.YLLEKSRAI.R	FALSE	9	P35579	MYH9	class I	AML14_DCB
299		>sp|P35579|MYH9_HUMAN Myosin-9 OS=Homo sapiens GN=MYH9 PE=1 SV=4	L.KITDVIIGF.Q	FALSE	9	P35579	MYH9	class I	AML14_DCB
300		>sp|P35579|MYH9_HUMAN Myosin-9 OS=Homo sapiens GN=MYH9 PE=1 SV=4	L.KITDVIIGF.Q	FALSE	9	P35579	MYH9	class I	AML14_DCB
301		>sp|P35579|MYH9_HUMAN Myosin-9 OS=Homo sapiens GN=MYH9 PE=1 SV=4	L.KITDVIIGF.Q	FALSE	9	P35579	MYH9	class I	AML14_DCB
302		>sp|P35579|MYH9_HUMAN Myosin-9 OS=Homo sapiens GN=MYH9 PE=1 SV=4	S.QLMAEKLQL.Q	FALSE	9	P35579	MYH9	class I	AML14_DCB
303		>sp|P35579|MYH9_HUMAN Myosin-9 OS=Homo sapiens GN=MYH9 PE=1 SV=4	K.KLLEDRIAEF.T	FALSE	10	P35579	MYH9	class I	AML14_DCB
304		>sp|P35579|MYH9_HUMAN Myosin-9 OS=Homo sapiens GN=MYH9 PE=1 SV=4	K.KLLEDRIAEF.T	FALSE	10	P35579	MYH9	class I	AML14_DCB
305		>sp|P35579|MYH9_HUMAN Myosin-9 OS=Homo sapiens GN=MYH9 PE=1 SV=4	R.VEEEAAQK.N	FALSE	8	P35579	MYH9	class I	AML14_DCB
306		>sp|P35579|MYH9_HUMAN Myosin-9 OS=Homo sapiens GN=MYH9 PE=1 SV=4	Q.EENRQKLSL.S	FALSE	9	P35579	MYH9	class I	AML14_DCB
307		>sp|P35579|MYH9_HUMAN Myosin-9 OS=Homo sapiens GN=MYH9 PE=1 SV=4	Q.EENRQKLSL.S	FALSE	9	P35579	MYH9	class I	AML14_DCB
308		>sp|P35579|MYH9_HUMAN Myosin-9 OS=Homo sapiens GN=MYH9 PE=1 SV=4	A.EEKTISAKY.A	FALSE	9	P35579	MYH9	class I	AML14_DCB
309		>sp|P35579|MYH9_HUMAN Myosin-9 OS=Homo sapiens GN=MYH9 PE=1 SV=4	L.QEMEGTVKSKY.K	FALSE	11	P35579	MYH9	class I	AML14_DCB
310		>sp|P35579|MYH9_HUMAN Myosin-9 OS=Homo sapiens GN=MYH9 PE=1 SV=4	D.GKADGAEAKPAE.-	FALSE	12	P35579	MYH9	class I	AML14_DCB
311		>sp|P61160|ARP2_HUMAN Actin-related protein 2 OS=Homo sapiens GN=ACTR2 PE=1 SV=1	S.NFPEHIFPAL.V	FALSE	10	P61160	ACTR2	class I	AML14_DCB
312		>sp|P61160|ARP2_HUMAN Actin-related protein 2 OS=Homo sapiens GN=ACTR2 PE=1 SV=1	S.NFPEHIFPAL.V	FALSE	10	P61160	ACTR2	class I	AML14_DCB
313		>sp|P61160|ARP2_HUMAN Actin-related protein 2 OS=Homo sapiens GN=ACTR2 PE=1 SV=1	S.NFPEHIFPAL.V	FALSE	10	P61160	ACTR2	class I	AML14_DCB
314		>sp|P61160|ARP2_HUMAN Actin-related protein 2 OS=Homo sapiens GN=ACTR2 PE=1 SV=1	S.NFPEHIFPAL.V	FALSE	10	P61160	ACTR2	class I	AML14_DCB
315		>sp|P61160|ARP2_HUMAN Actin-related protein 2 OS=Homo sapiens GN=ACTR2 PE=1 SV=1	S.NFPEHIFPAL.V	FALSE	10	P61160	ACTR2	class I	AML14_DCB
316		>sp|P61160|ARP2_HUMAN Actin-related protein 2 OS=Homo sapiens GN=ACTR2 PE=1 SV=1	N.YPMENGIV.R	FALSE	8	P61160	ACTR2	class I	AML14_DCB
317		>sp|P61160|ARP2_HUMAN Actin-related protein 2 OS=Homo sapiens GN=ACTR2 PE=1 SV=1	P.MENGIVRNW.D	FALSE	9	P61160	ACTR2	class I	AML14_DCB
318		>sp|P61160|ARP2_HUMAN Actin-related protein 2 OS=Homo sapiens GN=ACTR2 PE=1 SV=1	H.SADFETVRM.I	FALSE	9	P61160	ACTR2	class I	AML14_DCB
319		>sp|P61160|ARP2_HUMAN Actin-related protein 2 OS=Homo sapiens GN=ACTR2 PE=1 SV=1	T.LPDGRIIKV.G	FALSE	9	P61160	ACTR2	class I	AML14_DCB
320		>sp|P61160|ARP2_HUMAN Actin-related protein 2 OS=Homo sapiens GN=ACTR2 PE=1 SV=1	T.LPDGRIIKV.G	FALSE	9	P61160	ACTR2	class I	AML14_DCB
321		>sp|P61160|ARP2_HUMAN Actin-related protein 2 OS=Homo sapiens GN=ACTR2 PE=1 SV=1	T.LPDGRIIKV.G	FALSE	9	P61160	ACTR2	class I	AML14_DCB
322		>sp|P61160|ARP2_HUMAN Actin-related protein 2 OS=Homo sapiens GN=ACTR2 PE=1 SV=1	T.LPDGRIIKV.G	FALSE	9	P61160	ACTR2	class I	AML14_DCB
323		>sp|P61160|ARP2_HUMAN Actin-related protein 2 OS=Homo sapiens GN=ACTR2 PE=1 SV=1	T.LPDGRIIKV.G	FALSE	9	P61160	ACTR2	class I	AML14_DCB
324		>sp|P61160|ARP2_HUMAN Actin-related protein 2 OS=Homo sapiens GN=ACTR2 PE=1 SV=1	T.LPDGRIIKV.G	FALSE	9	P61160	ACTR2	class I	AML14_DCB
325		>sp|P61160|ARP2_HUMAN Actin-related protein 2 OS=Homo sapiens GN=ACTR2 PE=1 SV=1	T.LPDGRIIKV.G	FALSE	9	P61160	ACTR2	class I	AML14_DCB
326		>sp|P61160|ARP2_HUMAN Actin-related protein 2 OS=Homo sapiens GN=ACTR2 PE=1 SV=1	T.LPDGRIIKV.G	FALSE	9	P61160	ACTR2	class I	AML14_DCB
327		>sp|P61160|ARP2_HUMAN Actin-related protein 2 OS=Homo sapiens GN=ACTR2 PE=1 SV=1	L.PDGRIIKV.G	FALSE	8	P61160	ACTR2	class I	AML14_DCB
328		>sp|P61160|ARP2_HUMAN Actin-related protein 2 OS=Homo sapiens GN=ACTR2 PE=1 SV=1	L.PDGRIIKV.G	FALSE	8	P61160	ACTR2	class I	AML14_DCB
329		>sp|P61160|ARP2_HUMAN Actin-related protein 2 OS=Homo sapiens GN=ACTR2 PE=1 SV=1	Q.AADIDTRSEF.Y	FALSE	10	P61160	ACTR2	class I	AML14_DCB
330		>sp|P61160|ARP2_HUMAN Actin-related protein 2 OS=Homo sapiens GN=ACTR2 PE=1 SV=1	A.ADIDTRSEFY.K	FALSE	10	P61160	ACTR2	class I	AML14_DCB
331		>sp|P61160|ARP2_HUMAN Actin-related protein 2 OS=Homo sapiens GN=ACTR2 PE=1 SV=1	A.ADIDTRSEFY.K	FALSE	10	P61160	ACTR2	class I	AML14_DCB
332		>sp|P04818|TYSY_HUMAN Thymidylate synthase OS=Homo sapiens GN=TYMS PE=1 SV=3	E.FPLLTTKRV.F	FALSE	9	P04818	TYMS	class I	AML14_DCB
333		>sp|P04818|TYSY_HUMAN Thymidylate synthase OS=Homo sapiens GN=TYMS PE=1 SV=3	Q.FYVVNSEL.S	FALSE	8	P04818	TYMS	class I	AML14_DCB
334		>sp|P04818|TYSY_HUMAN Thymidylate synthase OS=Homo sapiens GN=TYMS PE=1 SV=3	Q.FYVVNSEL.S	FALSE	8	P04818	TYMS	class I	AML14_DCB
335		>sp|P04818|TYSY_HUMAN Thymidylate synthase OS=Homo sapiens GN=TYMS PE=1 SV=3	C.QLYQRSGDMGL.G	FALSE	11	P04818	TYMS	class I	AML14_DCB
336	M[+16]	>sp|P04818|TYSY_HUMAN Thymidylate synthase OS=Homo sapiens GN=TYMS PE=1 SV=3	T.YM[+15.995]IAHITGL.K	FALSE	9	P04818	TYMS	class I	AML14_DCB
337		>sp|P04818|TYSY_HUMAN Thymidylate synthase OS=Homo sapiens GN=TYMS PE=1 SV=3	H.TLGDAHIYL.N	FALSE	9	P04818	TYMS	class I	AML14_DCB
338		>sp|P04818|TYSY_HUMAN Thymidylate synthase OS=Homo sapiens GN=TYMS PE=1 SV=3	H.TLGDAHIYL.N	FALSE	9	P04818	TYMS	class I	AML14_DCB
339		>sp|P04818|TYSY_HUMAN Thymidylate synthase OS=Homo sapiens GN=TYMS PE=1 SV=3	G.DAHIYLNHI.E	FALSE	9	P04818	TYMS	class I	AML14_DCB
340		>sp|P04818|TYSY_HUMAN Thymidylate synthase OS=Homo sapiens GN=TYMS PE=1 SV=3	G.DAHIYLNHI.E	FALSE	9	P04818	TYMS	class I	AML14_DCB
341		>sp|P04818|TYSY_HUMAN Thymidylate synthase OS=Homo sapiens GN=TYMS PE=1 SV=3	G.DAHIYLNHI.E	FALSE	9	P04818	TYMS	class I	AML14_DCB
342		>sp|P04818|TYSY_HUMAN Thymidylate synthase OS=Homo sapiens GN=TYMS PE=1 SV=3	G.DAHIYLNHI.E	FALSE	9	P04818	TYMS	class I	AML14_DCB
343		>sp|P04818|TYSY_HUMAN Thymidylate synthase OS=Homo sapiens GN=TYMS PE=1 SV=3	G.DAHIYLNHI.E	FALSE	9	P04818	TYMS	class I	AML14_DCB
344		>sp|P04818|TYSY_HUMAN Thymidylate synthase OS=Homo sapiens GN=TYMS PE=1 SV=3	G.DAHIYLNHI.E	FALSE	9	P04818	TYMS	class I	AML14_DCB
345		>sp|P04818|TYSY_HUMAN Thymidylate synthase OS=Homo sapiens GN=TYMS PE=1 SV=3	G.DAHIYLNHI.E	FALSE	9	P04818	TYMS	class I	AML14_DCB
346		>sp|P04818|TYSY_HUMAN Thymidylate synthase OS=Homo sapiens GN=TYMS PE=1 SV=3	G.DAHIYLNHI.E	FALSE	9	P04818	TYMS	class I	AML14_DCB
347		>sp|P04818|TYSY_HUMAN Thymidylate synthase OS=Homo sapiens GN=TYMS PE=1 SV=3	G.DAHIYLNHI.E	FALSE	9	P04818	TYMS	class I	AML14_DCB
348		>sp|P04818|TYSY_HUMAN Thymidylate synthase OS=Homo sapiens GN=TYMS PE=1 SV=3	D.AHIYLNHI.E	FALSE	8	P04818	TYMS	class I	AML14_DCB
349		>sp|P04818|TYSY_HUMAN Thymidylate synthase OS=Homo sapiens GN=TYMS PE=1 SV=3	D.AHIYLNHI.E	FALSE	8	P04818	TYMS	class I	AML14_DCB
350		>sp|P04818|TYSY_HUMAN Thymidylate synthase OS=Homo sapiens GN=TYMS PE=1 SV=3	D.AHIYLNHI.E	FALSE	8	P04818	TYMS	class I	AML14_DCB
351		>sp|Q16531|DDB1_HUMAN DNA damage-binding protein 1 OS=Homo sapiens GN=DDB1 PE=1 SV=1	V.GMYGKIAVMEL.F	FALSE	11	Q16531	DDB1	class I	AML14_DCB
352		>sp|Q16531|DDB1_HUMAN DNA damage-binding protein 1 OS=Homo sapiens GN=DDB1 PE=1 SV=1	P.EPFGGAIII.G	FALSE	9	Q16531	DDB1	class I	AML14_DCB
353		>sp|Q16531|DDB1_HUMAN DNA damage-binding protein 1 OS=Homo sapiens GN=DDB1 PE=1 SV=1	P.EPFGGAIII.G	FALSE	9	Q16531	DDB1	class I	AML14_DCB
354		>sp|Q16531|DDB1_HUMAN DNA damage-binding protein 1 OS=Homo sapiens GN=DDB1 PE=1 SV=1	P.EPFGGAIII.G	FALSE	9	Q16531	DDB1	class I	AML14_DCB
355		>sp|Q16531|DDB1_HUMAN DNA damage-binding protein 1 OS=Homo sapiens GN=DDB1 PE=1 SV=1	I.TYHNGDKY.L	FALSE	8	Q16531	DDB1	class I	AML14_DCB
356		>sp|Q16531|DDB1_HUMAN DNA damage-binding protein 1 OS=Homo sapiens GN=DDB1 PE=1 SV=1	N.RVDPNGSRYLL.G	FALSE	11	Q16531	DDB1	class I	AML14_DCB
357		>sp|Q16531|DDB1_HUMAN DNA damage-binding protein 1 OS=Homo sapiens GN=DDB1 PE=1 SV=1	N.RVDPNGSRYLL.G	FALSE	11	Q16531	DDB1	class I	AML14_DCB
358		>sp|Q16531|DDB1_HUMAN DNA damage-binding protein 1 OS=Homo sapiens GN=DDB1 PE=1 SV=1	T.YLDNGVVFV.G	FALSE	9	Q16531	DDB1	class I	AML14_DCB
359		>sp|Q16531|DDB1_HUMAN DNA damage-binding protein 1 OS=Homo sapiens GN=DDB1 PE=1 SV=1	T.YLDNGVVFV.G	FALSE	9	Q16531	DDB1	class I	AML14_DCB
360		>sp|Q16531|DDB1_HUMAN DNA damage-binding protein 1 OS=Homo sapiens GN=DDB1 PE=1 SV=1	G.FVDDQQTFF.C	FALSE	9	Q16531	DDB1	class I	AML14_DCB
361		>sp|Q16531|DDB1_HUMAN DNA damage-binding protein 1 OS=Homo sapiens GN=DDB1 PE=1 SV=1	V.VVAVGRALY.Y	FALSE	9	Q16531	DDB1	class I	AML14_DCB
362		>sp|Q16531|DDB1_HUMAN DNA damage-binding protein 1 OS=Homo sapiens GN=DDB1 PE=1 SV=1	V.VVAVGRALY.Y	FALSE	9	Q16531	DDB1	class I	AML14_DCB
363		>sp|Q16531|DDB1_HUMAN DNA damage-binding protein 1 OS=Homo sapiens GN=DDB1 PE=1 SV=1	V.VVAVGRALY.Y	FALSE	9	Q16531	DDB1	class I	AML14_DCB
364		>sp|Q16531|DDB1_HUMAN DNA damage-binding protein 1 OS=Homo sapiens GN=DDB1 PE=1 SV=1	V.AEKEVKGAVY.S	FALSE	10	Q16531	DDB1	class I	AML14_DCB
365		>sp|Q16531|DDB1_HUMAN DNA damage-binding protein 1 OS=Homo sapiens GN=DDB1 PE=1 SV=1	N.LLLDMQNRL.N	FALSE	9	Q16531	DDB1	class I	AML14_DCB
366		>sp|Q16531|DDB1_HUMAN DNA damage-binding protein 1 OS=Homo sapiens GN=DDB1 PE=1 SV=1	N.LLLDMQNRL.N	FALSE	9	Q16531	DDB1	class I	AML14_DCB
367		>sp|Q16531|DDB1_HUMAN DNA damage-binding protein 1 OS=Homo sapiens GN=DDB1 PE=1 SV=1	N.RLNKVIKSV.G	FALSE	9	Q16531	DDB1	class I	AML14_DCB
368		>sp|P55061|BI1_HUMAN Bax inhibitor 1 OS=Homo sapiens GN=TMBIM6 PE=1 SV=2	F.DALLKFSHI.T	FALSE	9	P55061	TMBIM6	class I	AML14_DCB
369		>sp|P55061|BI1_HUMAN Bax inhibitor 1 OS=Homo sapiens GN=TMBIM6 PE=1 SV=2	F.DALLKFSHI.T	FALSE	9	P55061	TMBIM6	class I	AML14_DCB
370		>sp|P55061|BI1_HUMAN Bax inhibitor 1 OS=Homo sapiens GN=TMBIM6 PE=1 SV=2	F.DALLKFSHI.T	FALSE	9	P55061	TMBIM6	class I	AML14_DCB
371		>sp|P55061|BI1_HUMAN Bax inhibitor 1 OS=Homo sapiens GN=TMBIM6 PE=1 SV=2	G.AYVHMVTHF.I	FALSE	9	P55061	TMBIM6	class I	AML14_DCB
372		>sp|P55061|BI1_HUMAN Bax inhibitor 1 OS=Homo sapiens GN=TMBIM6 PE=1 SV=2	G.AYVHMVTHF.I	FALSE	9	P55061	TMBIM6	class I	AML14_DCB
373		>sp|P55061|BI1_HUMAN Bax inhibitor 1 OS=Homo sapiens GN=TMBIM6 PE=1 SV=2	G.AYVHMVTHF.I	FALSE	9	P55061	TMBIM6	class I	AML14_DCB
374		>sp|P55061|BI1_HUMAN Bax inhibitor 1 OS=Homo sapiens GN=TMBIM6 PE=1 SV=2	G.AYVHMVTHF.I	FALSE	9	P55061	TMBIM6	class I	AML14_DCB
375		>sp|P55061|BI1_HUMAN Bax inhibitor 1 OS=Homo sapiens GN=TMBIM6 PE=1 SV=2	G.AYVHMVTHF.I	FALSE	9	P55061	TMBIM6	class I	AML14_DCB
376	M[+16]	>sp|P55061|BI1_HUMAN Bax inhibitor 1 OS=Homo sapiens GN=TMBIM6 PE=1 SV=2	G.AYVHM[+15.995]VTHF.I	FALSE	9	P55061	TMBIM6	class I	AML14_DCB
377	M[+16]	>sp|P55061|BI1_HUMAN Bax inhibitor 1 OS=Homo sapiens GN=TMBIM6 PE=1 SV=2	G.AYVHM[+15.995]VTHF.I	FALSE	9	P55061	TMBIM6	class I	AML14_DCB
378	M[+16]	>sp|P55061|BI1_HUMAN Bax inhibitor 1 OS=Homo sapiens GN=TMBIM6 PE=1 SV=2	G.AYVHM[+15.995]VTHF.I	FALSE	9	P55061	TMBIM6	class I	AML14_DCB
379	M[+16]	>sp|P55061|BI1_HUMAN Bax inhibitor 1 OS=Homo sapiens GN=TMBIM6 PE=1 SV=2	G.AYVHM[+15.995]VTHF.I	FALSE	9	P55061	TMBIM6	class I	AML14_DCB
380	M[+16]	>sp|P55061|BI1_HUMAN Bax inhibitor 1 OS=Homo sapiens GN=TMBIM6 PE=1 SV=2	G.AYVHM[+15.995]VTHF.I	FALSE	9	P55061	TMBIM6	class I	AML14_DCB
381		>sp|P55061|BI1_HUMAN Bax inhibitor 1 OS=Homo sapiens GN=TMBIM6 PE=1 SV=2	T.HFIQAGLLSAL.G	FALSE	11	P55061	TMBIM6	class I	AML14_DCB
382		>sp|P55061|BI1_HUMAN Bax inhibitor 1 OS=Homo sapiens GN=TMBIM6 PE=1 SV=2	K.AEHGDQDYIW.H	FALSE	10	P55061	TMBIM6	class I	AML14_DCB
383		>sp|P04406|G3P_HUMAN Glyceraldehyde-3-phosphate dehydrogenase OS=Homo sapiens GN=GAPDH PE=1 SV=3	K.AGAHLQGGAK.R	FALSE	10	P04406	GAPDH	class I	AML14_DCB
384		>sp|P04406|G3P_HUMAN Glyceraldehyde-3-phosphate dehydrogenase OS=Homo sapiens GN=GAPDH PE=1 SV=3	K.AGAHLQGGAK.R	FALSE	10	P04406	GAPDH	class I	AML14_DCB
385		>sp|P04406|G3P_HUMAN Glyceraldehyde-3-phosphate dehydrogenase OS=Homo sapiens GN=GAPDH PE=1 SV=3	K.AGAHLQGGAK.R	FALSE	10	P04406	GAPDH	class I	AML14_DCB
386		>sp|P04406|G3P_HUMAN Glyceraldehyde-3-phosphate dehydrogenase OS=Homo sapiens GN=GAPDH PE=1 SV=3	E.GLMTTVHAI.T	FALSE	9	P04406	GAPDH	class I	AML14_DCB
387		>sp|P04406|G3P_HUMAN Glyceraldehyde-3-phosphate dehydrogenase OS=Homo sapiens GN=GAPDH PE=1 SV=3	K.TVDGPSGK.L	FALSE	8	P04406	GAPDH	class I	AML14_DCB
388		>sp|P04406|G3P_HUMAN Glyceraldehyde-3-phosphate dehydrogenase OS=Homo sapiens GN=GAPDH PE=1 SV=3	K.TVDGPSGK.L	FALSE	8	P04406	GAPDH	class I	AML14_DCB
389		>sp|P04406|G3P_HUMAN Glyceraldehyde-3-phosphate dehydrogenase OS=Homo sapiens GN=GAPDH PE=1 SV=3	K.TVDGPSGK.L	FALSE	8	P04406	GAPDH	class I	AML14_DCB
390		>sp|P04406|G3P_HUMAN Glyceraldehyde-3-phosphate dehydrogenase OS=Homo sapiens GN=GAPDH PE=1 SV=3	K.TVDGPSGK.L	FALSE	8	P04406	GAPDH	class I	AML14_DCB
391		>sp|P04406|G3P_HUMAN Glyceraldehyde-3-phosphate dehydrogenase OS=Homo sapiens GN=GAPDH PE=1 SV=3	K.TVDGPSGK.L	FALSE	8	P04406	GAPDH	class I	AML14_DCB
392		>sp|P04406|G3P_HUMAN Glyceraldehyde-3-phosphate dehydrogenase OS=Homo sapiens GN=GAPDH PE=1 SV=3	R.GALQNIIPASTGAAK.A	FALSE	15	P04406	GAPDH	class I	AML14_DCB
393		>sp|P04406|G3P_HUMAN Glyceraldehyde-3-phosphate dehydrogenase OS=Homo sapiens GN=GAPDH PE=1 SV=3	R.GALQNIIPASTGAAK.A	FALSE	15	P04406	GAPDH	class I	AML14_DCB
394		>sp|P04406|G3P_HUMAN Glyceraldehyde-3-phosphate dehydrogenase OS=Homo sapiens GN=GAPDH PE=1 SV=3	K.QASEGPLK.G	FALSE	8	P04406	GAPDH	class I	AML14_DCB
395		>sp|P04406|G3P_HUMAN Glyceraldehyde-3-phosphate dehydrogenase OS=Homo sapiens GN=GAPDH PE=1 SV=3	F.NSDTHSSTF.D	FALSE	9	P04406	GAPDH	class I	AML14_DCB
396		>sp|P04406|G3P_HUMAN Glyceraldehyde-3-phosphate dehydrogenase OS=Homo sapiens GN=GAPDH PE=1 SV=3	F.NSDTHSSTF.D	FALSE	9	P04406	GAPDH	class I	AML14_DCB
397		>sp|P04406|G3P_HUMAN Glyceraldehyde-3-phosphate dehydrogenase OS=Homo sapiens GN=GAPDH PE=1 SV=3	L.MAHMASKE.-	FALSE	8	P04406	GAPDH	class I	AML14_DCB
398		>sp|P06899|H2B1J_HUMAN Histone H2B type 1-J OS=Homo sapiens GN=HIST1H2BJ PE=1 SV=3	M.PEPAKSAPAP.K	FALSE	10	P06899	HIST1H2BJ	class I	AML14_DCB
399		>sp|P06899|H2B1J_HUMAN Histone H2B type 1-J OS=Homo sapiens GN=HIST1H2BJ PE=1 SV=3	K.QVHPDTGISSK.A	FALSE	11	P06899	HIST1H2BJ	class I	AML14_DCB
400		>sp|P06899|H2B1J_HUMAN Histone H2B type 1-J OS=Homo sapiens GN=HIST1H2BJ PE=1 SV=3	K.QVHPDTGISSK.A	FALSE	11	P06899	HIST1H2BJ	class I	AML14_DCB
401		>sp|P06899|H2B1J_HUMAN Histone H2B type 1-J OS=Homo sapiens GN=HIST1H2BJ PE=1 SV=3	A.GEASRLAHY.N	FALSE	9	P06899	HIST1H2BJ	class I	AML14_DCB
402		>sp|P06899|H2B1J_HUMAN Histone H2B type 1-J OS=Homo sapiens GN=HIST1H2BJ PE=1 SV=3	A.GEASRLAHY.N	FALSE	9	P06899	HIST1H2BJ	class I	AML14_DCB
403		>sp|P06899|H2B1J_HUMAN Histone H2B type 1-J OS=Homo sapiens GN=HIST1H2BJ PE=1 SV=3	A.GEASRLAHY.N	FALSE	9	P06899	HIST1H2BJ	class I	AML14_DCB
404		>sp|P06899|H2B1J_HUMAN Histone H2B type 1-J OS=Homo sapiens GN=HIST1H2BJ PE=1 SV=3	G.EASRLAHY.N	FALSE	8	P06899	HIST1H2BJ	class I	AML14_DCB
405		>sp|P06899|H2B1J_HUMAN Histone H2B type 1-J OS=Homo sapiens GN=HIST1H2BJ PE=1 SV=3	G.EASRLAHY.N	FALSE	8	P06899	HIST1H2BJ	class I	AML14_DCB
406		>sp|P06899|H2B1J_HUMAN Histone H2B type 1-J OS=Homo sapiens GN=HIST1H2BJ PE=1 SV=3	R.LLLPGELAK.H	FALSE	9	P06899	HIST1H2BJ	class I	AML14_DCB
407		>sp|P06899|H2B1J_HUMAN Histone H2B type 1-J OS=Homo sapiens GN=HIST1H2BJ PE=1 SV=3	R.LLLPGELAKHAV.S	FALSE	12	P06899	HIST1H2BJ	class I	AML14_DCB
408		>sp|P06899|H2B1J_HUMAN Histone H2B type 1-J OS=Homo sapiens GN=HIST1H2BJ PE=1 SV=3	R.LLLPGELAKHAV.S	FALSE	12	P06899	HIST1H2BJ	class I	AML14_DCB
409		>sp|P06899|H2B1J_HUMAN Histone H2B type 1-J OS=Homo sapiens GN=HIST1H2BJ PE=1 SV=3	R.LLLPGELAKHAV.S	FALSE	12	P06899	HIST1H2BJ	class I	AML14_DCB
410		>sp|P39656|OST48_HUMAN Dolichyl-diphosphooligosaccharide--protein glycosyltransferase 48 kDa subunit OS=Homo sapiens GN=DDOST PE=1 SV=4	K.MEPSTAARAW.A	FALSE	10	P39656	DDOST	class I	AML14_DCB
411		>sp|P39656|OST48_HUMAN Dolichyl-diphosphooligosaccharide--protein glycosyltransferase 48 kDa subunit OS=Homo sapiens GN=DDOST PE=1 SV=4	K.TADDPSLSL.I	FALSE	9	P39656	DDOST	class I	AML14_DCB
412		>sp|P39656|OST48_HUMAN Dolichyl-diphosphooligosaccharide--protein glycosyltransferase 48 kDa subunit OS=Homo sapiens GN=DDOST PE=1 SV=4	K.TADDPSLSL.I	FALSE	9	P39656	DDOST	class I	AML14_DCB
413		>sp|P39656|OST48_HUMAN Dolichyl-diphosphooligosaccharide--protein glycosyltransferase 48 kDa subunit OS=Homo sapiens GN=DDOST PE=1 SV=4	K.TADDPSLSL.I	FALSE	9	P39656	DDOST	class I	AML14_DCB
414		>sp|P39656|OST48_HUMAN Dolichyl-diphosphooligosaccharide--protein glycosyltransferase 48 kDa subunit OS=Homo sapiens GN=DDOST PE=1 SV=4	S.FFPDKPITQY.P	FALSE	10	P39656	DDOST	class I	AML14_DCB
415		>sp|P39656|OST48_HUMAN Dolichyl-diphosphooligosaccharide--protein glycosyltransferase 48 kDa subunit OS=Homo sapiens GN=DDOST PE=1 SV=4	S.FFPDKPITQY.P	FALSE	10	P39656	DDOST	class I	AML14_DCB
416		>sp|P39656|OST48_HUMAN Dolichyl-diphosphooligosaccharide--protein glycosyltransferase 48 kDa subunit OS=Homo sapiens GN=DDOST PE=1 SV=4	S.FFPDKPITQY.P	FALSE	10	P39656	DDOST	class I	AML14_DCB
417		>sp|P39656|OST48_HUMAN Dolichyl-diphosphooligosaccharide--protein glycosyltransferase 48 kDa subunit OS=Homo sapiens GN=DDOST PE=1 SV=4	S.FFPDKPITQY.P	FALSE	10	P39656	DDOST	class I	AML14_DCB
418		>sp|P39656|OST48_HUMAN Dolichyl-diphosphooligosaccharide--protein glycosyltransferase 48 kDa subunit OS=Homo sapiens GN=DDOST PE=1 SV=4	S.FFPDKPITQY.P	FALSE	10	P39656	DDOST	class I	AML14_DCB
419		>sp|P39656|OST48_HUMAN Dolichyl-diphosphooligosaccharide--protein glycosyltransferase 48 kDa subunit OS=Homo sapiens GN=DDOST PE=1 SV=4	F.PDKPITQY.P	FALSE	8	P39656	DDOST	class I	AML14_DCB
420		>sp|P39656|OST48_HUMAN Dolichyl-diphosphooligosaccharide--protein glycosyltransferase 48 kDa subunit OS=Homo sapiens GN=DDOST PE=1 SV=4	F.PDKPITQY.P	FALSE	8	P39656	DDOST	class I	AML14_DCB
421		>sp|P39656|OST48_HUMAN Dolichyl-diphosphooligosaccharide--protein glycosyltransferase 48 kDa subunit OS=Homo sapiens GN=DDOST PE=1 SV=4	F.PDKPITQY.P	FALSE	8	P39656	DDOST	class I	AML14_DCB
422		>sp|P39656|OST48_HUMAN Dolichyl-diphosphooligosaccharide--protein glycosyltransferase 48 kDa subunit OS=Homo sapiens GN=DDOST PE=1 SV=4	Q.YPHAVGKNTLLI.A	FALSE	12	P39656	DDOST	class I	AML14_DCB
423		>sp|P39656|OST48_HUMAN Dolichyl-diphosphooligosaccharide--protein glycosyltransferase 48 kDa subunit OS=Homo sapiens GN=DDOST PE=1 SV=4	Q.YPHAVGKNTLLI.A	FALSE	12	P39656	DDOST	class I	AML14_DCB
424		>sp|P39656|OST48_HUMAN Dolichyl-diphosphooligosaccharide--protein glycosyltransferase 48 kDa subunit OS=Homo sapiens GN=DDOST PE=1 SV=4	Q.YPHAVGKNTLLI.A	FALSE	12	P39656	DDOST	class I	AML14_DCB
425		>sp|P39656|OST48_HUMAN Dolichyl-diphosphooligosaccharide--protein glycosyltransferase 48 kDa subunit OS=Homo sapiens GN=DDOST PE=1 SV=4	Q.YPHAVGKNTLLI.A	FALSE	12	P39656	DDOST	class I	AML14_DCB
426		>sp|P39656|OST48_HUMAN Dolichyl-diphosphooligosaccharide--protein glycosyltransferase 48 kDa subunit OS=Homo sapiens GN=DDOST PE=1 SV=4	E.TAPPNAYTV.T	FALSE	9	P39656	DDOST	class I	AML14_DCB
427		>sp|P39656|OST48_HUMAN Dolichyl-diphosphooligosaccharide--protein glycosyltransferase 48 kDa subunit OS=Homo sapiens GN=DDOST PE=1 SV=4	E.RFIPSAYPY.Y	FALSE	9	P39656	DDOST	class I	AML14_DCB
428		>sp|P39656|OST48_HUMAN Dolichyl-diphosphooligosaccharide--protein glycosyltransferase 48 kDa subunit OS=Homo sapiens GN=DDOST PE=1 SV=4	S.AYPYYASAF.S	FALSE	9	P39656	DDOST	class I	AML14_DCB
429		>sp|P39656|OST48_HUMAN Dolichyl-diphosphooligosaccharide--protein glycosyltransferase 48 kDa subunit OS=Homo sapiens GN=DDOST PE=1 SV=4	S.AYPYYASAF.S	FALSE	9	P39656	DDOST	class I	AML14_DCB
430		>sp|P39656|OST48_HUMAN Dolichyl-diphosphooligosaccharide--protein glycosyltransferase 48 kDa subunit OS=Homo sapiens GN=DDOST PE=1 SV=4	S.AYPYYASAF.S	FALSE	9	P39656	DDOST	class I	AML14_DCB
431		>sp|P39656|OST48_HUMAN Dolichyl-diphosphooligosaccharide--protein glycosyltransferase 48 kDa subunit OS=Homo sapiens GN=DDOST PE=1 SV=4	S.AYPYYASAF.S	FALSE	9	P39656	DDOST	class I	AML14_DCB
432		>sp|P11388|TOP2A_HUMAN DNA topoisomerase 2-alpha OS=Homo sapiens GN=TOP2A PE=1 SV=3	Y.KIFDEILVNA.A	FALSE	10	P11388	TOP2A	class I	AML14_DCB
433		>sp|P11388|TOP2A_HUMAN DNA topoisomerase 2-alpha OS=Homo sapiens GN=TOP2A PE=1 SV=3	Y.KIFDEILVNA.A	FALSE	10	P11388	TOP2A	class I	AML14_DCB
434		>sp|P11388|TOP2A_HUMAN DNA topoisomerase 2-alpha OS=Homo sapiens GN=TOP2A PE=1 SV=3	D.KLDETGNSL.K	FALSE	9	P11388	TOP2A	class I	AML14_DCB
435		>sp|P11388|TOP2A_HUMAN DNA topoisomerase 2-alpha OS=Homo sapiens GN=TOP2A PE=1 SV=3	D.KLDETGNSL.K	FALSE	9	P11388	TOP2A	class I	AML14_DCB
436		>sp|P11388|TOP2A_HUMAN DNA topoisomerase 2-alpha OS=Homo sapiens GN=TOP2A PE=1 SV=3	D.KLDETGNSL.K	FALSE	9	P11388	TOP2A	class I	AML14_DCB
437		>sp|P11388|TOP2A_HUMAN DNA topoisomerase 2-alpha OS=Homo sapiens GN=TOP2A PE=1 SV=3	D.KLDETGNSL.K	FALSE	9	P11388	TOP2A	class I	AML14_DCB
438		>sp|P11388|TOP2A_HUMAN DNA topoisomerase 2-alpha OS=Homo sapiens GN=TOP2A PE=1 SV=3	Y.VADQIVTKL.V	FALSE	9	P11388	TOP2A	class I	AML14_DCB
439		>sp|P11388|TOP2A_HUMAN DNA topoisomerase 2-alpha OS=Homo sapiens GN=TOP2A PE=1 SV=3	N.AEINNIIKI.V	FALSE	9	P11388	TOP2A	class I	AML14_DCB
440		>sp|P11388|TOP2A_HUMAN DNA topoisomerase 2-alpha OS=Homo sapiens GN=TOP2A PE=1 SV=3	K.FLYDDNQRV.E	FALSE	9	P11388	TOP2A	class I	AML14_DCB
441		>sp|P11388|TOP2A_HUMAN DNA topoisomerase 2-alpha OS=Homo sapiens GN=TOP2A PE=1 SV=3	K.FLYDDNQRV.E	FALSE	9	P11388	TOP2A	class I	AML14_DCB
442		>sp|P11388|TOP2A_HUMAN DNA topoisomerase 2-alpha OS=Homo sapiens GN=TOP2A PE=1 SV=3	G.AEGIGTGW.S	FALSE	8	P11388	TOP2A	class I	AML14_DCB
443		>sp|P11388|TOP2A_HUMAN DNA topoisomerase 2-alpha OS=Homo sapiens GN=TOP2A PE=1 SV=3	F.DVREIVNNI.R	FALSE	9	P11388	TOP2A	class I	AML14_DCB
444		>sp|P11388|TOP2A_HUMAN DNA topoisomerase 2-alpha OS=Homo sapiens GN=TOP2A PE=1 SV=3	H.KVFKLQTSL.T	FALSE	9	P11388	TOP2A	class I	AML14_DCB
445		>sp|P11388|TOP2A_HUMAN DNA topoisomerase 2-alpha OS=Homo sapiens GN=TOP2A PE=1 SV=3	H.KVFKLQTSL.T	FALSE	9	P11388	TOP2A	class I	AML14_DCB
446		>sp|P11388|TOP2A_HUMAN DNA topoisomerase 2-alpha OS=Homo sapiens GN=TOP2A PE=1 SV=3	H.KVFKLQTSL.T	FALSE	9	P11388	TOP2A	class I	AML14_DCB
447		>sp|P24001-2|IL32_HUMAN Isoform 2 of Interleukin-32 OS=Homo sapiens GN=IL32	A.RMHQAIERF.Y	FALSE	9	P24001-2	IL32	class I	AML14_DCB
448		>sp|P24001-2|IL32_HUMAN Isoform 2 of Interleukin-32 OS=Homo sapiens GN=IL32	A.RMHQAIERF.Y	FALSE	9	P24001-2	IL32	class I	AML14_DCB
449		>sp|P24001-2|IL32_HUMAN Isoform 2 of Interleukin-32 OS=Homo sapiens GN=IL32	A.RMHQAIERF.Y	FALSE	9	P24001-2	IL32	class I	AML14_DCB
450	M[+16]	>sp|P24001-2|IL32_HUMAN Isoform 2 of Interleukin-32 OS=Homo sapiens GN=IL32	A.RM[+15.995]HQAIERF.Y	FALSE	9	P24001-2	IL32	class I	AML14_DCB
451		>sp|P24001-2|IL32_HUMAN Isoform 2 of Interleukin-32 OS=Homo sapiens GN=IL32	N.AESGRGQVM.S	FALSE	9	P24001-2	IL32	class I	AML14_DCB
452		>sp|P24001-2|IL32_HUMAN Isoform 2 of Interleukin-32 OS=Homo sapiens GN=IL32	N.AESGRGQVM.S	FALSE	9	P24001-2	IL32	class I	AML14_DCB
453		>sp|P24001-2|IL32_HUMAN Isoform 2 of Interleukin-32 OS=Homo sapiens GN=IL32	P.ATEEPGESF.C	FALSE	9	P24001-2	IL32	class I	AML14_DCB
454		>sp|P24001-2|IL32_HUMAN Isoform 2 of Interleukin-32 OS=Homo sapiens GN=IL32	D.KVMRWFQAM.L	FALSE	9	P24001-2	IL32	class I	AML14_DCB
455		>sp|P24001-2|IL32_HUMAN Isoform 2 of Interleukin-32 OS=Homo sapiens GN=IL32	D.KVMRWFQAM.L	FALSE	9	P24001-2	IL32	class I	AML14_DCB
456		>sp|P24001-2|IL32_HUMAN Isoform 2 of Interleukin-32 OS=Homo sapiens GN=IL32	D.KVMRWFQAM.L	FALSE	9	P24001-2	IL32	class I	AML14_DCB
457		>sp|P24001-2|IL32_HUMAN Isoform 2 of Interleukin-32 OS=Homo sapiens GN=IL32	E.KVVALVHAV.Q	FALSE	9	P24001-2	IL32	class I	AML14_DCB
458		>sp|P24001-2|IL32_HUMAN Isoform 2 of Interleukin-32 OS=Homo sapiens GN=IL32	E.KVVALVHAV.Q	FALSE	9	P24001-2	IL32	class I	AML14_DCB
459		>sp|P24001-2|IL32_HUMAN Isoform 2 of Interleukin-32 OS=Homo sapiens GN=IL32	E.LFMSSFQSY.G	FALSE	9	P24001-2	IL32	class I	AML14_DCB
460	M[+16]	>sp|P24001-2|IL32_HUMAN Isoform 2 of Interleukin-32 OS=Homo sapiens GN=IL32	E.LFM[+15.995]SSFQSY.G	FALSE	9	P24001-2	IL32	class I	AML14_DCB
461	M[+16]	>sp|P24001-2|IL32_HUMAN Isoform 2 of Interleukin-32 OS=Homo sapiens GN=IL32	E.LFM[+15.995]SSFQSY.G	FALSE	9	P24001-2	IL32	class I	AML14_DCB
462	M[+16]	>sp|P24001-2|IL32_HUMAN Isoform 2 of Interleukin-32 OS=Homo sapiens GN=IL32	E.LFM[+15.995]SSFQSY.G	FALSE	9	P24001-2	IL32	class I	AML14_DCB
463	M[+16]	>sp|P24001-2|IL32_HUMAN Isoform 2 of Interleukin-32 OS=Homo sapiens GN=IL32	E.LFM[+15.995]SSFQSY.G	FALSE	9	P24001-2	IL32	class I	AML14_DCB
464	M[+16]	>sp|P24001-2|IL32_HUMAN Isoform 2 of Interleukin-32 OS=Homo sapiens GN=IL32	E.LFM[+15.995]SSFQSY.G	FALSE	9	P24001-2	IL32	class I	AML14_DCB
465		>sp|Q9ULW0|TPX2_HUMAN Targeting protein for Xklp2 OS=Homo sapiens GN=TPX2 PE=1 SV=2	G.GLFQGKTPL.R	FALSE	9	Q9ULW0	TPX2	class I	AML14_DCB
466		>sp|Q9ULW0|TPX2_HUMAN Targeting protein for Xklp2 OS=Homo sapiens GN=TPX2 PE=1 SV=2	G.GLFQGKTPL.R	FALSE	9	Q9ULW0	TPX2	class I	AML14_DCB
467		>sp|Q9ULW0|TPX2_HUMAN Targeting protein for Xklp2 OS=Homo sapiens GN=TPX2 PE=1 SV=2	G.GLFQGKTPL.R	FALSE	9	Q9ULW0	TPX2	class I	AML14_DCB
468		>sp|Q9ULW0|TPX2_HUMAN Targeting protein for Xklp2 OS=Homo sapiens GN=TPX2 PE=1 SV=2	T.EEQELEKSM.K	FALSE	9	Q9ULW0	TPX2	class I	AML14_DCB
469	M[+16]	>sp|Q9ULW0|TPX2_HUMAN Targeting protein for Xklp2 OS=Homo sapiens GN=TPX2 PE=1 SV=2	T.EEQELEKSM[+15.995].K	FALSE	9	Q9ULW0	TPX2	class I	AML14_DCB
470	M[+16]	>sp|Q9ULW0|TPX2_HUMAN Targeting protein for Xklp2 OS=Homo sapiens GN=TPX2 PE=1 SV=2	T.EEQELEKSM[+15.995].K	FALSE	9	Q9ULW0	TPX2	class I	AML14_DCB
471		>sp|Q9ULW0|TPX2_HUMAN Targeting protein for Xklp2 OS=Homo sapiens GN=TPX2 PE=1 SV=2	A.EELEKLQQY.K	FALSE	9	Q9ULW0	TPX2	class I	AML14_DCB
472		>sp|Q9ULW0|TPX2_HUMAN Targeting protein for Xklp2 OS=Homo sapiens GN=TPX2 PE=1 SV=2	A.EELEKLQQY.K	FALSE	9	Q9ULW0	TPX2	class I	AML14_DCB
473		>sp|Q9ULW0|TPX2_HUMAN Targeting protein for Xklp2 OS=Homo sapiens GN=TPX2 PE=1 SV=2	T.KILEDVVGV.P	FALSE	9	Q9ULW0	TPX2	class I	AML14_DCB
474		>sp|Q9ULW0|TPX2_HUMAN Targeting protein for Xklp2 OS=Homo sapiens GN=TPX2 PE=1 SV=2	T.KILEDVVGV.P	FALSE	9	Q9ULW0	TPX2	class I	AML14_DCB
475		>sp|Q9ULW0|TPX2_HUMAN Targeting protein for Xklp2 OS=Homo sapiens GN=TPX2 PE=1 SV=2	T.KILEDVVGV.P	FALSE	9	Q9ULW0	TPX2	class I	AML14_DCB
476		>sp|Q9ULW0|TPX2_HUMAN Targeting protein for Xklp2 OS=Homo sapiens GN=TPX2 PE=1 SV=2	T.KILEDVVGV.P	FALSE	9	Q9ULW0	TPX2	class I	AML14_DCB
477		>sp|Q9ULW0|TPX2_HUMAN Targeting protein for Xklp2 OS=Homo sapiens GN=TPX2 PE=1 SV=2	T.KILEDVVGV.P	FALSE	9	Q9ULW0	TPX2	class I	AML14_DCB
478		>sp|Q9ULW0|TPX2_HUMAN Targeting protein for Xklp2 OS=Homo sapiens GN=TPX2 PE=1 SV=2	A.LPLPHFDTI.N	FALSE	9	Q9ULW0	TPX2	class I	AML14_DCB
479		>sp|Q9ULW0|TPX2_HUMAN Targeting protein for Xklp2 OS=Homo sapiens GN=TPX2 PE=1 SV=2	A.LPLPHFDTI.N	FALSE	9	Q9ULW0	TPX2	class I	AML14_DCB
480		>sp|Q9ULW0|TPX2_HUMAN Targeting protein for Xklp2 OS=Homo sapiens GN=TPX2 PE=1 SV=2	K.SSDQPLTV.P	FALSE	8	Q9ULW0	TPX2	class I	AML14_DCB
481		>sp|Q9ULW0|TPX2_HUMAN Targeting protein for Xklp2 OS=Homo sapiens GN=TPX2 PE=1 SV=2	K.SSDQPLTV.P	FALSE	8	Q9ULW0	TPX2	class I	AML14_DCB
482		>sp|Q9UKK3|PARP4_HUMAN Poly [ADP-ribose] polymerase 4 OS=Homo sapiens GN=PARP4 PE=1 SV=3	Y.DPYKPLDI.T	FALSE	8	Q9UKK3	PARP4	class I	AML14_DCB
483		>sp|Q9UKK3|PARP4_HUMAN Poly [ADP-ribose] polymerase 4 OS=Homo sapiens GN=PARP4 PE=1 SV=3	Y.DPYKPLDI.T	FALSE	8	Q9UKK3	PARP4	class I	AML14_DCB
484		>sp|Q9UKK3|PARP4_HUMAN Poly [ADP-ribose] polymerase 4 OS=Homo sapiens GN=PARP4 PE=1 SV=3	C.QLIRDMVNV.C	FALSE	9	Q9UKK3	PARP4	class I	AML14_DCB
485		>sp|Q9UKK3|PARP4_HUMAN Poly [ADP-ribose] polymerase 4 OS=Homo sapiens GN=PARP4 PE=1 SV=3	G.RIIDTVAQV.I	FALSE	9	Q9UKK3	PARP4	class I	AML14_DCB
486		>sp|Q9UKK3|PARP4_HUMAN Poly [ADP-ribose] polymerase 4 OS=Homo sapiens GN=PARP4 PE=1 SV=3	I.KEIGTKQSF.S	FALSE	9	Q9UKK3	PARP4	class I	AML14_DCB
487		>sp|Q9UKK3|PARP4_HUMAN Poly [ADP-ribose] polymerase 4 OS=Homo sapiens GN=PARP4 PE=1 SV=3	E.FIFSDTHEL.K	FALSE	9	Q9UKK3	PARP4	class I	AML14_DCB
488		>sp|Q9UKK3|PARP4_HUMAN Poly [ADP-ribose] polymerase 4 OS=Homo sapiens GN=PARP4 PE=1 SV=3	S.TANRHVLRI.L	FALSE	9	Q9UKK3	PARP4	class I	AML14_DCB
489		>sp|Q9UKK3|PARP4_HUMAN Poly [ADP-ribose] polymerase 4 OS=Homo sapiens GN=PARP4 PE=1 SV=3	L.HENETSHEM.K	FALSE	9	Q9UKK3	PARP4	class I	AML14_DCB
490		>sp|Q9UKK3|PARP4_HUMAN Poly [ADP-ribose] polymerase 4 OS=Homo sapiens GN=PARP4 PE=1 SV=3	E.SPFPDIPKV.S	FALSE	9	Q9UKK3	PARP4	class I	AML14_DCB
491		>sp|Q9UKK3|PARP4_HUMAN Poly [ADP-ribose] polymerase 4 OS=Homo sapiens GN=PARP4 PE=1 SV=3	E.SPFPDIPKV.S	FALSE	9	Q9UKK3	PARP4	class I	AML14_DCB
492		>sp|Q9UKK3|PARP4_HUMAN Poly [ADP-ribose] polymerase 4 OS=Homo sapiens GN=PARP4 PE=1 SV=3	D.DASISRNI.P	FALSE	8	Q9UKK3	PARP4	class I	AML14_DCB
493		>sp|P09651|ROA1_HUMAN Heterogeneous nuclear ribonucleoprotein A1 OS=Homo sapiens GN=HNRNPA1 PE=1 SV=5	K.SESPKEPEQLRK.L	FALSE	12	P09651	HNRNPA1	class I	AML14_DCB
494		>sp|P09651|ROA1_HUMAN Heterogeneous nuclear ribonucleoprotein A1 OS=Homo sapiens GN=HNRNPA1 PE=1 SV=5	R.KLFIGGLSF.E	FALSE	9	P09651	HNRNPA1	class I	AML14_DCB
495		>sp|P09651|ROA1_HUMAN Heterogeneous nuclear ribonucleoprotein A1 OS=Homo sapiens GN=HNRNPA1 PE=1 SV=5	R.KLFIGGLSF.E	FALSE	9	P09651	HNRNPA1	class I	AML14_DCB
496		>sp|P09651|ROA1_HUMAN Heterogeneous nuclear ribonucleoprotein A1 OS=Homo sapiens GN=HNRNPA1 PE=1 SV=5	R.KLFIGGLSF.E	FALSE	9	P09651	HNRNPA1	class I	AML14_DCB
497		>sp|P09651|ROA1_HUMAN Heterogeneous nuclear ribonucleoprotein A1 OS=Homo sapiens GN=HNRNPA1 PE=1 SV=5	R.KLFIGGLSF.E	FALSE	9	P09651	HNRNPA1	class I	AML14_DCB
498		>sp|P09651|ROA1_HUMAN Heterogeneous nuclear ribonucleoprotein A1 OS=Homo sapiens GN=HNRNPA1 PE=1 SV=5	R.KLFIGGLSF.E	FALSE	9	P09651	HNRNPA1	class I	AML14_DCB
499		>sp|P09651|ROA1_HUMAN Heterogeneous nuclear ribonucleoprotein A1 OS=Homo sapiens GN=HNRNPA1 PE=1 SV=5	R.KLFIGGLSF.E	FALSE	9	P09651	HNRNPA1	class I	AML14_DCB
500		>sp|P09651|ROA1_HUMAN Heterogeneous nuclear ribonucleoprotein A1 OS=Homo sapiens GN=HNRNPA1 PE=1 SV=5	E.SLRSHFEQW.G	FALSE	9	P09651	HNRNPA1	class I	AML14_DCB
501		>sp|P09651|ROA1_HUMAN Heterogeneous nuclear ribonucleoprotein A1 OS=Homo sapiens GN=HNRNPA1 PE=1 SV=5	E.SLRSHFEQW.G	FALSE	9	P09651	HNRNPA1	class I	AML14_DCB
502		>sp|P09651|ROA1_HUMAN Heterogeneous nuclear ribonucleoprotein A1 OS=Homo sapiens GN=HNRNPA1 PE=1 SV=5	A.AMNARPHKV.D	FALSE	9	P09651	HNRNPA1	class I	AML14_DCB
503		>sp|P09651|ROA1_HUMAN Heterogeneous nuclear ribonucleoprotein A1 OS=Homo sapiens GN=HNRNPA1 PE=1 SV=5	K.EDTEEHHLR.D	FALSE	9	P09651	HNRNPA1	class I	AML14_DCB
504		>sp|P09651|ROA1_HUMAN Heterogeneous nuclear ribonucleoprotein A1 OS=Homo sapiens GN=HNRNPA1 PE=1 SV=5	G.NYNNQSSNF.G	FALSE	9	P09651	HNRNPA1	class I	AML14_DCB
505		>sp|P09651|ROA1_HUMAN Heterogeneous nuclear ribonucleoprotein A1 OS=Homo sapiens GN=HNRNPA1 PE=1 SV=5	G.NYNNQSSNF.G	FALSE	9	P09651	HNRNPA1	class I	AML14_DCB
506		>sp|P09651|ROA1_HUMAN Heterogeneous nuclear ribonucleoprotein A1 OS=Homo sapiens GN=HNRNPA1 PE=1 SV=5	K.PRNQGGYGGSSSSSSYGSGR.R	FALSE	20	P09651	HNRNPA1	class I	AML14_DCB
507		>sp|P09651|ROA1_HUMAN Heterogeneous nuclear ribonucleoprotein A1 OS=Homo sapiens GN=HNRNPA1 PE=1 SV=5	G.GSSSSSSYGSGRRF.-	FALSE	14	P09651	HNRNPA1	class I	AML14_DCB
508		>sp|P50990|TCPQ_HUMAN T-complex protein 1 subunit theta OS=Homo sapiens GN=CCT8 PE=1 SV=4	S.KQYGNEVFL.A	FALSE	9	P50990	CCT8	class I	AML14_DCB
509		>sp|P50990|TCPQ_HUMAN T-complex protein 1 subunit theta OS=Homo sapiens GN=CCT8 PE=1 SV=4	S.KQYGNEVFL.A	FALSE	9	P50990	CCT8	class I	AML14_DCB
510		>sp|P50990|TCPQ_HUMAN T-complex protein 1 subunit theta OS=Homo sapiens GN=CCT8 PE=1 SV=4	V.FLAKLIAQA.C	FALSE	9	P50990	CCT8	class I	AML14_DCB
511		>sp|P50990|TCPQ_HUMAN T-complex protein 1 subunit theta OS=Homo sapiens GN=CCT8 PE=1 SV=4	V.FLAKLIAQA.C	FALSE	9	P50990	CCT8	class I	AML14_DCB
512		>sp|P50990|TCPQ_HUMAN T-complex protein 1 subunit theta OS=Homo sapiens GN=CCT8 PE=1 SV=4	V.FLAKLIAQA.C	FALSE	9	P50990	CCT8	class I	AML14_DCB
513		>sp|P50990|TCPQ_HUMAN T-complex protein 1 subunit theta OS=Homo sapiens GN=CCT8 PE=1 SV=4	N.KYNIMLVRL.N	FALSE	9	P50990	CCT8	class I	AML14_DCB
514		>sp|P50990|TCPQ_HUMAN T-complex protein 1 subunit theta OS=Homo sapiens GN=CCT8 PE=1 SV=4	N.KYNIMLVRL.N	FALSE	9	P50990	CCT8	class I	AML14_DCB
515		>sp|P50990|TCPQ_HUMAN T-complex protein 1 subunit theta OS=Homo sapiens GN=CCT8 PE=1 SV=4	N.KYNIMLVRL.N	FALSE	9	P50990	CCT8	class I	AML14_DCB
516	M[+16]	>sp|P50990|TCPQ_HUMAN T-complex protein 1 subunit theta OS=Homo sapiens GN=CCT8 PE=1 SV=4	N.KYNIM[+15.995]LVRL.N	FALSE	9	P50990	CCT8	class I	AML14_DCB
517		>sp|P50990|TCPQ_HUMAN T-complex protein 1 subunit theta OS=Homo sapiens GN=CCT8 PE=1 SV=4	A.LPRLTPPVL.E	FALSE	9	P50990	CCT8	class I	AML14_DCB
518		>sp|P50990|TCPQ_HUMAN T-complex protein 1 subunit theta OS=Homo sapiens GN=CCT8 PE=1 SV=4	A.LPRLTPPVL.E	FALSE	9	P50990	CCT8	class I	AML14_DCB
519		>sp|P50990|TCPQ_HUMAN T-complex protein 1 subunit theta OS=Homo sapiens GN=CCT8 PE=1 SV=4	A.LPRLTPPVL.E	FALSE	9	P50990	CCT8	class I	AML14_DCB
520		>sp|P50990|TCPQ_HUMAN T-complex protein 1 subunit theta OS=Homo sapiens GN=CCT8 PE=1 SV=4	A.LPRLTPPVL.E	FALSE	9	P50990	CCT8	class I	AML14_DCB
521		>sp|P50990|TCPQ_HUMAN T-complex protein 1 subunit theta OS=Homo sapiens GN=CCT8 PE=1 SV=4	E.VGDTQVVVF.K	FALSE	9	P50990	CCT8	class I	AML14_DCB
522		>sp|P50990|TCPQ_HUMAN T-complex protein 1 subunit theta OS=Homo sapiens GN=CCT8 PE=1 SV=4	E.VGDTQVVVF.K	FALSE	9	P50990	CCT8	class I	AML14_DCB
523		>sp|P50990|TCPQ_HUMAN T-complex protein 1 subunit theta OS=Homo sapiens GN=CCT8 PE=1 SV=4	E.VGDTQVVVF.K	FALSE	9	P50990	CCT8	class I	AML14_DCB
524		>sp|P50990|TCPQ_HUMAN T-complex protein 1 subunit theta OS=Homo sapiens GN=CCT8 PE=1 SV=4	D.NLMDDIERA.V	FALSE	9	P50990	CCT8	class I	AML14_DCB
525		>sp|P50990|TCPQ_HUMAN T-complex protein 1 subunit theta OS=Homo sapiens GN=CCT8 PE=1 SV=4	R.AVDDGVNTF.K	FALSE	9	P50990	CCT8	class I	AML14_DCB
526		>sp|P50990|TCPQ_HUMAN T-complex protein 1 subunit theta OS=Homo sapiens GN=CCT8 PE=1 SV=4	R.AVDDGVNTF.K	FALSE	9	P50990	CCT8	class I	AML14_DCB
527		>sp|P50990|TCPQ_HUMAN T-complex protein 1 subunit theta OS=Homo sapiens GN=CCT8 PE=1 SV=4	K.LYAVHQEGNK.N	FALSE	10	P50990	CCT8	class I	AML14_DCB
528		>sp|Q9Y678|COPG1_HUMAN Coatomer subunit gamma-1 OS=Homo sapiens GN=COPG1 PE=1 SV=1	Q.AIVDKVPSV.S	FALSE	9	Q9Y678	COPG1	class I	AML14_DCB
529		>sp|Q9Y678|COPG1_HUMAN Coatomer subunit gamma-1 OS=Homo sapiens GN=COPG1 PE=1 SV=1	Q.AIVDKVPSV.S	FALSE	9	Q9Y678	COPG1	class I	AML14_DCB
530		>sp|Q9Y678|COPG1_HUMAN Coatomer subunit gamma-1 OS=Homo sapiens GN=COPG1 PE=1 SV=1	Q.AIVDKVPSV.S	FALSE	9	Q9Y678	COPG1	class I	AML14_DCB
531		>sp|Q9Y678|COPG1_HUMAN Coatomer subunit gamma-1 OS=Homo sapiens GN=COPG1 PE=1 SV=1	Q.AIVDKVPSV.S	FALSE	9	Q9Y678	COPG1	class I	AML14_DCB
532		>sp|Q9Y678|COPG1_HUMAN Coatomer subunit gamma-1 OS=Homo sapiens GN=COPG1 PE=1 SV=1	S.ALVSSLHLL.K	FALSE	9	Q9Y678	COPG1	class I	AML14_DCB
533		>sp|Q9Y678|COPG1_HUMAN Coatomer subunit gamma-1 OS=Homo sapiens GN=COPG1 PE=1 SV=1	D.RLMKQISSF.M	FALSE	9	Q9Y678	COPG1	class I	AML14_DCB
534		>sp|Q9Y678|COPG1_HUMAN Coatomer subunit gamma-1 OS=Homo sapiens GN=COPG1 PE=1 SV=1	D.RLMKQISSF.M	FALSE	9	Q9Y678	COPG1	class I	AML14_DCB
535	M[+16]	>sp|Q9Y678|COPG1_HUMAN Coatomer subunit gamma-1 OS=Homo sapiens GN=COPG1 PE=1 SV=1	D.RLM[+15.995]KQISSF.M	FALSE	9	Q9Y678	COPG1	class I	AML14_DCB
536		>sp|Q9Y678|COPG1_HUMAN Coatomer subunit gamma-1 OS=Homo sapiens GN=COPG1 PE=1 SV=1	H.TFTNHMVF.Q	FALSE	8	Q9Y678	COPG1	class I	AML14_DCB
537		>sp|Q9Y678|COPG1_HUMAN Coatomer subunit gamma-1 OS=Homo sapiens GN=COPG1 PE=1 SV=1	E.VTVADHIQK.V	FALSE	9	Q9Y678	COPG1	class I	AML14_DCB
538		>sp|Q9Y678|COPG1_HUMAN Coatomer subunit gamma-1 OS=Homo sapiens GN=COPG1 PE=1 SV=1	V.TVADHIQKV.M	FALSE	9	Q9Y678	COPG1	class I	AML14_DCB
539		>sp|P62906|RL10A_HUMAN 60S ribosomal protein L10a OS=Homo sapiens GN=RPL10A PE=1 SV=2	D.TLYEAVREV.L	FALSE	9	P62906	RPL10A	class I	AML14_DCB
540		>sp|P62906|RL10A_HUMAN 60S ribosomal protein L10a OS=Homo sapiens GN=RPL10A PE=1 SV=2	D.TLYEAVREV.L	FALSE	9	P62906	RPL10A	class I	AML14_DCB
541		>sp|P62906|RL10A_HUMAN 60S ribosomal protein L10a OS=Homo sapiens GN=RPL10A PE=1 SV=2	D.TLYEAVREV.L	FALSE	9	P62906	RPL10A	class I	AML14_DCB
542		>sp|P62906|RL10A_HUMAN 60S ribosomal protein L10a OS=Homo sapiens GN=RPL10A PE=1 SV=2	A.FLASESLIKQI.P	FALSE	11	P62906	RPL10A	class I	AML14_DCB
543		>sp|P62906|RL10A_HUMAN 60S ribosomal protein L10a OS=Homo sapiens GN=RPL10A PE=1 SV=2	E.SLIKQIPRI.L	FALSE	9	P62906	RPL10A	class I	AML14_DCB
544		>sp|P62906|RL10A_HUMAN 60S ribosomal protein L10a OS=Homo sapiens GN=RPL10A PE=1 SV=2	E.SLIKQIPRI.L	FALSE	9	P62906	RPL10A	class I	AML14_DCB
545		>sp|P62906|RL10A_HUMAN 60S ribosomal protein L10a OS=Homo sapiens GN=RPL10A PE=1 SV=2	E.SLIKQIPRI.L	FALSE	9	P62906	RPL10A	class I	AML14_DCB
546		>sp|P62906|RL10A_HUMAN 60S ribosomal protein L10a OS=Homo sapiens GN=RPL10A PE=1 SV=2	E.SLIKQIPRI.L	FALSE	9	P62906	RPL10A	class I	AML14_DCB
547		>sp|P62906|RL10A_HUMAN 60S ribosomal protein L10a OS=Homo sapiens GN=RPL10A PE=1 SV=2	E.SLIKQIPRI.L	FALSE	9	P62906	RPL10A	class I	AML14_DCB
548		>sp|P62906|RL10A_HUMAN 60S ribosomal protein L10a OS=Homo sapiens GN=RPL10A PE=1 SV=2	E.SLIKQIPRI.L	FALSE	9	P62906	RPL10A	class I	AML14_DCB
549		>sp|P62906|RL10A_HUMAN 60S ribosomal protein L10a OS=Homo sapiens GN=RPL10A PE=1 SV=2	E.NMVAKVDEV.K	FALSE	9	P62906	RPL10A	class I	AML14_DCB
550		>sp|P62906|RL10A_HUMAN 60S ribosomal protein L10a OS=Homo sapiens GN=RPL10A PE=1 SV=2	E.NMVAKVDEV.K	FALSE	9	P62906	RPL10A	class I	AML14_DCB
551		>sp|P62906|RL10A_HUMAN 60S ribosomal protein L10a OS=Homo sapiens GN=RPL10A PE=1 SV=2	E.NMVAKVDEV.K	FALSE	9	P62906	RPL10A	class I	AML14_DCB
552	M[+16]	>sp|P62906|RL10A_HUMAN 60S ribosomal protein L10a OS=Homo sapiens GN=RPL10A PE=1 SV=2	E.NM[+15.995]VAKVDEV.K	FALSE	9	P62906	RPL10A	class I	AML14_DCB
553	M[+16]	>sp|P62906|RL10A_HUMAN 60S ribosomal protein L10a OS=Homo sapiens GN=RPL10A PE=1 SV=2	E.NM[+15.995]VAKVDEV.K	FALSE	9	P62906	RPL10A	class I	AML14_DCB
554		>sp|P62906|RL10A_HUMAN 60S ribosomal protein L10a OS=Homo sapiens GN=RPL10A PE=1 SV=2	L.VYNIHLAV.N	FALSE	8	P62906	RPL10A	class I	AML14_DCB
555		>sp|P12004|PCNA_HUMAN Proliferating cell nuclear antigen OS=Homo sapiens GN=PCNA PE=1 SV=1	A.RLVQGSILKKV.L	FALSE	11	P12004	PCNA	class I	AML14_DCB
556		>sp|P12004|PCNA_HUMAN Proliferating cell nuclear antigen OS=Homo sapiens GN=PCNA PE=1 SV=1	A.RLVQGSILKKV.L	FALSE	11	P12004	PCNA	class I	AML14_DCB
557		>sp|P12004|PCNA_HUMAN Proliferating cell nuclear antigen OS=Homo sapiens GN=PCNA PE=1 SV=1	E.ALKDLINEA.C	FALSE	9	P12004	PCNA	class I	AML14_DCB
558		>sp|P12004|PCNA_HUMAN Proliferating cell nuclear antigen OS=Homo sapiens GN=PCNA PE=1 SV=1	E.ALKDLINEA.C	FALSE	9	P12004	PCNA	class I	AML14_DCB
559		>sp|P12004|PCNA_HUMAN Proliferating cell nuclear antigen OS=Homo sapiens GN=PCNA PE=1 SV=1	M.KLMDLDVEQL.G	FALSE	10	P12004	PCNA	class I	AML14_DCB
560	M[+16]	>sp|P12004|PCNA_HUMAN Proliferating cell nuclear antigen OS=Homo sapiens GN=PCNA PE=1 SV=1	M.KLM[+15.995]DLDVEQL.G	FALSE	10	P12004	PCNA	class I	AML14_DCB
561		>sp|P12004|PCNA_HUMAN Proliferating cell nuclear antigen OS=Homo sapiens GN=PCNA PE=1 SV=1	K.MPSGEFARI.C	FALSE	9	P12004	PCNA	class I	AML14_DCB
562		>sp|P12004|PCNA_HUMAN Proliferating cell nuclear antigen OS=Homo sapiens GN=PCNA PE=1 SV=1	L.SMSADVPLV.V	FALSE	9	P12004	PCNA	class I	AML14_DCB
563		>sp|P12004|PCNA_HUMAN Proliferating cell nuclear antigen OS=Homo sapiens GN=PCNA PE=1 SV=1	L.SMSADVPLV.V	FALSE	9	P12004	PCNA	class I	AML14_DCB
564		>sp|P12004|PCNA_HUMAN Proliferating cell nuclear antigen OS=Homo sapiens GN=PCNA PE=1 SV=1	L.SMSADVPLV.V	FALSE	9	P12004	PCNA	class I	AML14_DCB
565		>sp|P12004|PCNA_HUMAN Proliferating cell nuclear antigen OS=Homo sapiens GN=PCNA PE=1 SV=1	L.SMSADVPLV.V	FALSE	9	P12004	PCNA	class I	AML14_DCB
566	M[+16]	>sp|P12004|PCNA_HUMAN Proliferating cell nuclear antigen OS=Homo sapiens GN=PCNA PE=1 SV=1	L.SM[+15.995]SADVPLV.V	FALSE	9	P12004	PCNA	class I	AML14_DCB
567	M[+16]	>sp|P12004|PCNA_HUMAN Proliferating cell nuclear antigen OS=Homo sapiens GN=PCNA PE=1 SV=1	L.SM[+15.995]SADVPLV.V	FALSE	9	P12004	PCNA	class I	AML14_DCB
568		>sp|Q04637-9|IF4G1_HUMAN Isoform 9 of Eukaryotic translation initiation factor 4 gamma 1 OS=Homo sapiens GN=EIF4G1	A.YYIPGQGRSTY.V	FALSE	11	Q04637-9	EIF4G1	class I	AML14_DCB
569		>sp|Q04637-9|IF4G1_HUMAN Isoform 9 of Eukaryotic translation initiation factor 4 gamma 1 OS=Homo sapiens GN=EIF4G1	K.EANPAVPEV.E	FALSE	9	Q04637-9	EIF4G1	class I	AML14_DCB
570		>sp|Q04637-9|IF4G1_HUMAN Isoform 9 of Eukaryotic translation initiation factor 4 gamma 1 OS=Homo sapiens GN=EIF4G1	K.EANPAVPEV.E	FALSE	9	Q04637-9	EIF4G1	class I	AML14_DCB
571		>sp|Q04637-9|IF4G1_HUMAN Isoform 9 of Eukaryotic translation initiation factor 4 gamma 1 OS=Homo sapiens GN=EIF4G1	K.EANPAVPEV.E	FALSE	9	Q04637-9	EIF4G1	class I	AML14_DCB
572		>sp|Q04637-9|IF4G1_HUMAN Isoform 9 of Eukaryotic translation initiation factor 4 gamma 1 OS=Homo sapiens GN=EIF4G1	T.VLMTEDIKL.N	FALSE	9	Q04637-9	EIF4G1	class I	AML14_DCB
573		>sp|Q04637-9|IF4G1_HUMAN Isoform 9 of Eukaryotic translation initiation factor 4 gamma 1 OS=Homo sapiens GN=EIF4G1	T.VLMTEDIKL.N	FALSE	9	Q04637-9	EIF4G1	class I	AML14_DCB
574	M[+16]	>sp|Q04637-9|IF4G1_HUMAN Isoform 9 of Eukaryotic translation initiation factor 4 gamma 1 OS=Homo sapiens GN=EIF4G1	T.VLM[+15.995]TEDIKL.N	FALSE	9	Q04637-9	EIF4G1	class I	AML14_DCB
575	M[+16]	>sp|Q04637-9|IF4G1_HUMAN Isoform 9 of Eukaryotic translation initiation factor 4 gamma 1 OS=Homo sapiens GN=EIF4G1	T.VLM[+15.995]TEDIKL.N	FALSE	9	Q04637-9	EIF4G1	class I	AML14_DCB
576		>sp|Q04637-9|IF4G1_HUMAN Isoform 9 of Eukaryotic translation initiation factor 4 gamma 1 OS=Homo sapiens GN=EIF4G1	Q.QLMKQVTQL.A	FALSE	9	Q04637-9	EIF4G1	class I	AML14_DCB
577		>sp|Q04637-9|IF4G1_HUMAN Isoform 9 of Eukaryotic translation initiation factor 4 gamma 1 OS=Homo sapiens GN=EIF4G1	G.SIDSNNQLF.A	FALSE	9	Q04637-9	EIF4G1	class I	AML14_DCB
578		>sp|Q04637-9|IF4G1_HUMAN Isoform 9 of Eukaryotic translation initiation factor 4 gamma 1 OS=Homo sapiens GN=EIF4G1	Y.ALQALVVTL.E	FALSE	9	Q04637-9	EIF4G1	class I	AML14_DCB
579		>sp|Q04637-9|IF4G1_HUMAN Isoform 9 of Eukaryotic translation initiation factor 4 gamma 1 OS=Homo sapiens GN=EIF4G1	D.VVKEDAFYSW.E	FALSE	10	Q04637-9	EIF4G1	class I	AML14_DCB
580		>sp|Q15393|SF3B3_HUMAN Splicing factor 3B subunit 3 OS=Homo sapiens GN=SF3B3 PE=1 SV=4	N.TLVYHVVGV.D	FALSE	9	Q15393	SF3B3	class I	AML14_DCB
581		>sp|Q15393|SF3B3_HUMAN Splicing factor 3B subunit 3 OS=Homo sapiens GN=SF3B3 PE=1 SV=4	N.TLVYHVVGV.D	FALSE	9	Q15393	SF3B3	class I	AML14_DCB
582		>sp|Q15393|SF3B3_HUMAN Splicing factor 3B subunit 3 OS=Homo sapiens GN=SF3B3 PE=1 SV=4	N.TLVYHVVGV.D	FALSE	9	Q15393	SF3B3	class I	AML14_DCB
583		>sp|Q15393|SF3B3_HUMAN Splicing factor 3B subunit 3 OS=Homo sapiens GN=SF3B3 PE=1 SV=4	L.VYHVVGVDV.G	FALSE	9	Q15393	SF3B3	class I	AML14_DCB
584		>sp|Q15393|SF3B3_HUMAN Splicing factor 3B subunit 3 OS=Homo sapiens GN=SF3B3 PE=1 SV=4	S.DGPSGVLI.C	FALSE	8	Q15393	SF3B3	class I	AML14_DCB
585		>sp|Q15393|SF3B3_HUMAN Splicing factor 3B subunit 3 OS=Homo sapiens GN=SF3B3 PE=1 SV=4	C.SLLGDDALVQV.Y	FALSE	11	Q15393	SF3B3	class I	AML14_DCB
586		>sp|Q15393|SF3B3_HUMAN Splicing factor 3B subunit 3 OS=Homo sapiens GN=SF3B3 PE=1 SV=4	Q.VYPDGIRHI.R	FALSE	9	Q15393	SF3B3	class I	AML14_DCB
587		>sp|Q15393|SF3B3_HUMAN Splicing factor 3B subunit 3 OS=Homo sapiens GN=SF3B3 PE=1 SV=4	Q.VYPDGIRHI.R	FALSE	9	Q15393	SF3B3	class I	AML14_DCB
588		>sp|Q15393|SF3B3_HUMAN Splicing factor 3B subunit 3 OS=Homo sapiens GN=SF3B3 PE=1 SV=4	E.KLGAVFNQV.A	FALSE	9	Q15393	SF3B3	class I	AML14_DCB
589		>sp|Q15393|SF3B3_HUMAN Splicing factor 3B subunit 3 OS=Homo sapiens GN=SF3B3 PE=1 SV=4	I.RVMNPIQGNTL.D	FALSE	11	Q15393	SF3B3	class I	AML14_DCB
590		>sp|Q15393|SF3B3_HUMAN Splicing factor 3B subunit 3 OS=Homo sapiens GN=SF3B3 PE=1 SV=4	I.RVMNPIQGNTL.D	FALSE	11	Q15393	SF3B3	class I	AML14_DCB
591		>sp|Q15393|SF3B3_HUMAN Splicing factor 3B subunit 3 OS=Homo sapiens GN=SF3B3 PE=1 SV=4	V.DEDPTGNKALW.D	FALSE	11	Q15393	SF3B3	class I	AML14_DCB
592		>sp|Q15393|SF3B3_HUMAN Splicing factor 3B subunit 3 OS=Homo sapiens GN=SF3B3 PE=1 SV=4	V.DEDPTGNKALW.D	FALSE	11	Q15393	SF3B3	class I	AML14_DCB
593		>sp|O75694|NU155_HUMAN Nuclear pore complex protein Nup155 OS=Homo sapiens GN=NUP155 PE=1 SV=1	D.YPLQGPGLLSV.P	FALSE	11	O75694	NUP155	class I	AML14_DCB
594		>sp|O75694|NU155_HUMAN Nuclear pore complex protein Nup155 OS=Homo sapiens GN=NUP155 PE=1 SV=1	R.SEKGVIQVY.D	FALSE	9	O75694	NUP155	class I	AML14_DCB
595		>sp|O75694|NU155_HUMAN Nuclear pore complex protein Nup155 OS=Homo sapiens GN=NUP155 PE=1 SV=1	R.ALYSKGILL.M	FALSE	9	O75694	NUP155	class I	AML14_DCB
596		>sp|O75694|NU155_HUMAN Nuclear pore complex protein Nup155 OS=Homo sapiens GN=NUP155 PE=1 SV=1	V.RFYEGVVEL.S	FALSE	9	O75694	NUP155	class I	AML14_DCB
597		>sp|O75694|NU155_HUMAN Nuclear pore complex protein Nup155 OS=Homo sapiens GN=NUP155 PE=1 SV=1	V.RFYEGVVEL.S	FALSE	9	O75694	NUP155	class I	AML14_DCB
598		>sp|O75694|NU155_HUMAN Nuclear pore complex protein Nup155 OS=Homo sapiens GN=NUP155 PE=1 SV=1	Q.AFQERLNSY.K	FALSE	9	O75694	NUP155	class I	AML14_DCB
599		>sp|O75694|NU155_HUMAN Nuclear pore complex protein Nup155 OS=Homo sapiens GN=NUP155 PE=1 SV=1	Q.AFQERLNSY.K	FALSE	9	O75694	NUP155	class I	AML14_DCB
600		>sp|O75694|NU155_HUMAN Nuclear pore complex protein Nup155 OS=Homo sapiens GN=NUP155 PE=1 SV=1	Q.AFQERLNSY.K	FALSE	9	O75694	NUP155	class I	AML14_DCB
601		>sp|O75694|NU155_HUMAN Nuclear pore complex protein Nup155 OS=Homo sapiens GN=NUP155 PE=1 SV=1	A.KVDQNRVRY.M	FALSE	9	O75694	NUP155	class I	AML14_DCB
602		>sp|O75694|NU155_HUMAN Nuclear pore complex protein Nup155 OS=Homo sapiens GN=NUP155 PE=1 SV=1	G.VPLPRLLEV.Y	FALSE	9	O75694	NUP155	class I	AML14_DCB
603		>sp|O75694|NU155_HUMAN Nuclear pore complex protein Nup155 OS=Homo sapiens GN=NUP155 PE=1 SV=1	G.VPLPRLLEV.Y	FALSE	9	O75694	NUP155	class I	AML14_DCB
604		>sp|P27708|PYR1_HUMAN CAD protein OS=Homo sapiens GN=CAD PE=1 SV=3	Q.GLADKVYFL.P	FALSE	9	P27708	CAD	class I	AML14_DCB
605		>sp|P27708|PYR1_HUMAN CAD protein OS=Homo sapiens GN=CAD PE=1 SV=3	Q.GLADKVYFL.P	FALSE	9	P27708	CAD	class I	AML14_DCB
606		>sp|P27708|PYR1_HUMAN CAD protein OS=Homo sapiens GN=CAD PE=1 SV=3	Q.TLNDREYQL.L	FALSE	9	P27708	CAD	class I	AML14_DCB
607		>sp|P27708|PYR1_HUMAN CAD protein OS=Homo sapiens GN=CAD PE=1 SV=3	Q.TLNDREYQL.L	FALSE	9	P27708	CAD	class I	AML14_DCB
608		>sp|P27708|PYR1_HUMAN CAD protein OS=Homo sapiens GN=CAD PE=1 SV=3	P.GLIDVHVHL.R	FALSE	9	P27708	CAD	class I	AML14_DCB
609		>sp|P27708|PYR1_HUMAN CAD protein OS=Homo sapiens GN=CAD PE=1 SV=3	A.ALAGGITMV.C	FALSE	9	P27708	CAD	class I	AML14_DCB
610		>sp|P27708|PYR1_HUMAN CAD protein OS=Homo sapiens GN=CAD PE=1 SV=3	A.MPNTRPPII.D	FALSE	9	P27708	CAD	class I	AML14_DCB
611		>sp|P27708|PYR1_HUMAN CAD protein OS=Homo sapiens GN=CAD PE=1 SV=3	A.MPNTRPPII.D	FALSE	9	P27708	CAD	class I	AML14_DCB
612	M[+16]	>sp|P27708|PYR1_HUMAN CAD protein OS=Homo sapiens GN=CAD PE=1 SV=3	A.M[+15.995]PNTRPPII.D	FALSE	9	P27708	CAD	class I	AML14_DCB
613		>sp|P27708|PYR1_HUMAN CAD protein OS=Homo sapiens GN=CAD PE=1 SV=3	S.HLFNVAHTL.R	FALSE	9	P27708	CAD	class I	AML14_DCB
614		>sp|P33993|MCM7_HUMAN DNA replication licensing factor MCM7 OS=Homo sapiens GN=MCM7 PE=1 SV=4	D.VYIEHRLMM.E	FALSE	9	P33993	MCM7	class I	AML14_DCB
615		>sp|P33993|MCM7_HUMAN DNA replication licensing factor MCM7 OS=Homo sapiens GN=MCM7 PE=1 SV=4	D.VYIEHRLMM.E	FALSE	9	P33993	MCM7	class I	AML14_DCB
616		>sp|P33993|MCM7_HUMAN DNA replication licensing factor MCM7 OS=Homo sapiens GN=MCM7 PE=1 SV=4	D.VYIEHRLMM.E	FALSE	9	P33993	MCM7	class I	AML14_DCB
617	M[+16]	>sp|P33993|MCM7_HUMAN DNA replication licensing factor MCM7 OS=Homo sapiens GN=MCM7 PE=1 SV=4	D.VYIEHRLMM[+15.995].E	FALSE	9	P33993	MCM7	class I	AML14_DCB
618		>sp|P33993|MCM7_HUMAN DNA replication licensing factor MCM7 OS=Homo sapiens GN=MCM7 PE=1 SV=4	M.KMQEHSDQV.P	FALSE	9	P33993	MCM7	class I	AML14_DCB
619		>sp|P33993|MCM7_HUMAN DNA replication licensing factor MCM7 OS=Homo sapiens GN=MCM7 PE=1 SV=4	M.KMQEHSDQV.P	FALSE	9	P33993	MCM7	class I	AML14_DCB
620		>sp|P33993|MCM7_HUMAN DNA replication licensing factor MCM7 OS=Homo sapiens GN=MCM7 PE=1 SV=4	N.IPRSITVLV.E	FALSE	9	P33993	MCM7	class I	AML14_DCB
621		>sp|P33993|MCM7_HUMAN DNA replication licensing factor MCM7 OS=Homo sapiens GN=MCM7 PE=1 SV=4	N.IPRSITVLV.E	FALSE	9	P33993	MCM7	class I	AML14_DCB
622		>sp|P33993|MCM7_HUMAN DNA replication licensing factor MCM7 OS=Homo sapiens GN=MCM7 PE=1 SV=4	N.IPRSITVLV.E	FALSE	9	P33993	MCM7	class I	AML14_DCB
623		>sp|P33993|MCM7_HUMAN DNA replication licensing factor MCM7 OS=Homo sapiens GN=MCM7 PE=1 SV=4	L.RLAQHITYV.H	FALSE	9	P33993	MCM7	class I	AML14_DCB
624		>sp|P33993|MCM7_HUMAN DNA replication licensing factor MCM7 OS=Homo sapiens GN=MCM7 PE=1 SV=4	L.RLAQHITYV.H	FALSE	9	P33993	MCM7	class I	AML14_DCB
625		>sp|P33993|MCM7_HUMAN DNA replication licensing factor MCM7 OS=Homo sapiens GN=MCM7 PE=1 SV=4	L.RLAQHITYV.H	FALSE	9	P33993	MCM7	class I	AML14_DCB
626		>sp|P33993|MCM7_HUMAN DNA replication licensing factor MCM7 OS=Homo sapiens GN=MCM7 PE=1 SV=4	L.RLAQHITYV.H	FALSE	9	P33993	MCM7	class I	AML14_DCB
627		>sp|P33993|MCM7_HUMAN DNA replication licensing factor MCM7 OS=Homo sapiens GN=MCM7 PE=1 SV=4	L.RLAQHITYV.H	FALSE	9	P33993	MCM7	class I	AML14_DCB
628		>sp|P33993|MCM7_HUMAN DNA replication licensing factor MCM7 OS=Homo sapiens GN=MCM7 PE=1 SV=4	E.SLADYITAA.Y	FALSE	9	P33993	MCM7	class I	AML14_DCB
629		>sp|P33993|MCM7_HUMAN DNA replication licensing factor MCM7 OS=Homo sapiens GN=MCM7 PE=1 SV=4	E.SLADYITAA.Y	FALSE	9	P33993	MCM7	class I	AML14_DCB
630		>sp|P33993|MCM7_HUMAN DNA replication licensing factor MCM7 OS=Homo sapiens GN=MCM7 PE=1 SV=4	E.SLADYITAA.Y	FALSE	9	P33993	MCM7	class I	AML14_DCB
631		>sp|P04222|1C03_HUMAN HLA class I histocompatibility antigen, Cw-3 alpha chain OS=Homo sapiens GN=HLA-C PE=1 SV=2	R.VMAPRTLIL.L	FALSE	9	P04222	HLA-C	class I	AML14_DCB
632	M[+16]	>sp|P04222|1C03_HUMAN HLA class I histocompatibility antigen, Cw-3 alpha chain OS=Homo sapiens GN=HLA-C PE=1 SV=2	R.VM[+15.995]APRTLIL.L	FALSE	9	P04222	HLA-C	class I	AML14_DCB
633	M[+16]	>sp|P04222|1C03_HUMAN HLA class I histocompatibility antigen, Cw-3 alpha chain OS=Homo sapiens GN=HLA-C PE=1 SV=2	R.VM[+15.995]APRTLIL.L	FALSE	9	P04222	HLA-C	class I	AML14_DCB
634		>sp|P04222|1C03_HUMAN HLA class I histocompatibility antigen, Cw-3 alpha chain OS=Homo sapiens GN=HLA-C PE=1 SV=2	V.MAPRTLIL.L	FALSE	8	P04222	HLA-C	class I	AML14_DCB
635		>sp|P04222|1C03_HUMAN HLA class I histocompatibility antigen, Cw-3 alpha chain OS=Homo sapiens GN=HLA-C PE=1 SV=2	V.MAPRTLIL.L	FALSE	8	P04222	HLA-C	class I	AML14_DCB
636		>sp|P04222|1C03_HUMAN HLA class I histocompatibility antigen, Cw-3 alpha chain OS=Homo sapiens GN=HLA-C PE=1 SV=2	V.MAPRTLIL.L	FALSE	8	P04222	HLA-C	class I	AML14_DCB
637		>sp|P04222|1C03_HUMAN HLA class I histocompatibility antigen, Cw-3 alpha chain OS=Homo sapiens GN=HLA-C PE=1 SV=2	V.MAPRTLIL.L	FALSE	8	P04222	HLA-C	class I	AML14_DCB
638		>sp|P04222|1C03_HUMAN HLA class I histocompatibility antigen, Cw-3 alpha chain OS=Homo sapiens GN=HLA-C PE=1 SV=2	V.MAPRTLIL.L	FALSE	8	P04222	HLA-C	class I	AML14_DCB
639	M[+16]	>sp|P04222|1C03_HUMAN HLA class I histocompatibility antigen, Cw-3 alpha chain OS=Homo sapiens GN=HLA-C PE=1 SV=2	V.M[+15.995]APRTLIL.L	FALSE	8	P04222	HLA-C	class I	AML14_DCB
640	M[+16]	>sp|P04222|1C03_HUMAN HLA class I histocompatibility antigen, Cw-3 alpha chain OS=Homo sapiens GN=HLA-C PE=1 SV=2	V.M[+15.995]APRTLIL.L	FALSE	8	P04222	HLA-C	class I	AML14_DCB
641		>sp|P04222|1C03_HUMAN HLA class I histocompatibility antigen, Cw-3 alpha chain OS=Homo sapiens GN=HLA-C PE=1 SV=2	Q.SEAGSHIIQRMY.G	FALSE	12	P04222	HLA-C	class I	AML14_DCB
642		>sp|P04222|1C03_HUMAN HLA class I histocompatibility antigen, Cw-3 alpha chain OS=Homo sapiens GN=HLA-C PE=1 SV=2	L.AVLGAVVAV.V	FALSE	9	P04222	HLA-C	class I	AML14_DCB
643		>sp|P04222|1C03_HUMAN HLA class I histocompatibility antigen, Cw-3 alpha chain OS=Homo sapiens GN=HLA-C PE=1 SV=2	L.AVLGAVVAV.V	FALSE	9	P04222	HLA-C	class I	AML14_DCB
644		>sp|Q8WWM7|ATX2L_HUMAN Ataxin-2-like protein OS=Homo sapiens GN=ATXN2L PE=1 SV=2	S.RMLHFLTAV.V	FALSE	9	Q8WWM7	ATXN2L	class I	AML14_DCB
645		>sp|Q8WWM7|ATX2L_HUMAN Ataxin-2-like protein OS=Homo sapiens GN=ATXN2L PE=1 SV=2	S.RMLHFLTAV.V	FALSE	9	Q8WWM7	ATXN2L	class I	AML14_DCB
646		>sp|Q8WWM7|ATX2L_HUMAN Ataxin-2-like protein OS=Homo sapiens GN=ATXN2L PE=1 SV=2	D.KFTDSAIAM.N	FALSE	9	Q8WWM7	ATXN2L	class I	AML14_DCB
647	M[+16]	>sp|Q8WWM7|ATX2L_HUMAN Ataxin-2-like protein OS=Homo sapiens GN=ATXN2L PE=1 SV=2	D.KFTDSAIAM[+15.995].N	FALSE	9	Q8WWM7	ATXN2L	class I	AML14_DCB
648		>sp|Q8WWM7|ATX2L_HUMAN Ataxin-2-like protein OS=Homo sapiens GN=ATXN2L PE=1 SV=2	Q.SYPHHATQL.H	FALSE	9	Q8WWM7	ATXN2L	class I	AML14_DCB
649		>sp|Q8WWM7|ATX2L_HUMAN Ataxin-2-like protein OS=Homo sapiens GN=ATXN2L PE=1 SV=2	Q.SYPHHATQL.H	FALSE	9	Q8WWM7	ATXN2L	class I	AML14_DCB
650		>sp|Q8WWM7|ATX2L_HUMAN Ataxin-2-like protein OS=Homo sapiens GN=ATXN2L PE=1 SV=2	Q.SYPHHATQL.H	FALSE	9	Q8WWM7	ATXN2L	class I	AML14_DCB
651		>sp|Q8WWM7|ATX2L_HUMAN Ataxin-2-like protein OS=Homo sapiens GN=ATXN2L PE=1 SV=2	Q.SYPHHATQL.H	FALSE	9	Q8WWM7	ATXN2L	class I	AML14_DCB
652		>sp|Q8WWM7|ATX2L_HUMAN Ataxin-2-like protein OS=Homo sapiens GN=ATXN2L PE=1 SV=2	S.SFPQPAAVY.A	FALSE	9	Q8WWM7	ATXN2L	class I	AML14_DCB
653		>sp|Q8WWM7|ATX2L_HUMAN Ataxin-2-like protein OS=Homo sapiens GN=ATXN2L PE=1 SV=2	S.SFPQPAAVY.A	FALSE	9	Q8WWM7	ATXN2L	class I	AML14_DCB
654		>sp|Q8WWM7|ATX2L_HUMAN Ataxin-2-like protein OS=Homo sapiens GN=ATXN2L PE=1 SV=2	S.SFPQPAAVY.A	FALSE	9	Q8WWM7	ATXN2L	class I	AML14_DCB
655		>sp|Q8WWM7|ATX2L_HUMAN Ataxin-2-like protein OS=Homo sapiens GN=ATXN2L PE=1 SV=2	S.SFPQPAAVY.A	FALSE	9	Q8WWM7	ATXN2L	class I	AML14_DCB
656		>sp|P84098|RL19_HUMAN 60S ribosomal protein L19 OS=Homo sapiens GN=RPL19 PE=1 SV=1	R.ILMEHIHKL.K	FALSE	9	P84098	RPL19	class I	AML14_DCB
657		>sp|P84098|RL19_HUMAN 60S ribosomal protein L19 OS=Homo sapiens GN=RPL19 PE=1 SV=1	R.ILMEHIHKL.K	FALSE	9	P84098	RPL19	class I	AML14_DCB
658		>sp|P84098|RL19_HUMAN 60S ribosomal protein L19 OS=Homo sapiens GN=RPL19 PE=1 SV=1	R.ILMEHIHKL.K	FALSE	9	P84098	RPL19	class I	AML14_DCB
659		>sp|P84098|RL19_HUMAN 60S ribosomal protein L19 OS=Homo sapiens GN=RPL19 PE=1 SV=1	R.ILMEHIHKL.K	FALSE	9	P84098	RPL19	class I	AML14_DCB
660		>sp|P84098|RL19_HUMAN 60S ribosomal protein L19 OS=Homo sapiens GN=RPL19 PE=1 SV=1	R.ILMEHIHKL.K	FALSE	9	P84098	RPL19	class I	AML14_DCB
661		>sp|P84098|RL19_HUMAN 60S ribosomal protein L19 OS=Homo sapiens GN=RPL19 PE=1 SV=1	R.ILMEHIHKL.K	FALSE	9	P84098	RPL19	class I	AML14_DCB
662		>sp|P84098|RL19_HUMAN 60S ribosomal protein L19 OS=Homo sapiens GN=RPL19 PE=1 SV=1	R.ILMEHIHKL.K	FALSE	9	P84098	RPL19	class I	AML14_DCB
663		>sp|P84098|RL19_HUMAN 60S ribosomal protein L19 OS=Homo sapiens GN=RPL19 PE=1 SV=1	R.ILMEHIHKL.K	FALSE	9	P84098	RPL19	class I	AML14_DCB
664	M[+16]	>sp|P84098|RL19_HUMAN 60S ribosomal protein L19 OS=Homo sapiens GN=RPL19 PE=1 SV=1	R.ILM[+15.995]EHIHKL.K	FALSE	9	P84098	RPL19	class I	AML14_DCB
665	M[+16]	>sp|P84098|RL19_HUMAN 60S ribosomal protein L19 OS=Homo sapiens GN=RPL19 PE=1 SV=1	R.ILM[+15.995]EHIHKL.K	FALSE	9	P84098	RPL19	class I	AML14_DCB
666	M[+16]	>sp|P84098|RL19_HUMAN 60S ribosomal protein L19 OS=Homo sapiens GN=RPL19 PE=1 SV=1	R.ILM[+15.995]EHIHKL.K	FALSE	9	P84098	RPL19	class I	AML14_DCB
667		>sp|P84098|RL19_HUMAN 60S ribosomal protein L19 OS=Homo sapiens GN=RPL19 PE=1 SV=1	I.LMEHIHKL.K	FALSE	8	P84098	RPL19	class I	AML14_DCB
668		>sp|P84098|RL19_HUMAN 60S ribosomal protein L19 OS=Homo sapiens GN=RPL19 PE=1 SV=1	I.LMEHIHKL.K	FALSE	8	P84098	RPL19	class I	AML14_DCB
669		>sp|P84098|RL19_HUMAN 60S ribosomal protein L19 OS=Homo sapiens GN=RPL19 PE=1 SV=1	I.LMEHIHKL.K	FALSE	8	P84098	RPL19	class I	AML14_DCB
670		>sp|P33992|MCM5_HUMAN DNA replication licensing factor MCM5 OS=Homo sapiens GN=MCM5 PE=1 SV=5	E.VLQDIQVML.K	FALSE	9	P33992	MCM5	class I	AML14_DCB
671	M[+16]	>sp|P33992|MCM5_HUMAN DNA replication licensing factor MCM5 OS=Homo sapiens GN=MCM5 PE=1 SV=5	E.VLQDIQVM[+15.995]L.K	FALSE	9	P33992	MCM5	class I	AML14_DCB
672	M[+16]	>sp|P33992|MCM5_HUMAN DNA replication licensing factor MCM5 OS=Homo sapiens GN=MCM5 PE=1 SV=5	E.VLQDIQVM[+15.995]L.K	FALSE	9	P33992	MCM5	class I	AML14_DCB
673		>sp|P33992|MCM5_HUMAN DNA replication licensing factor MCM5 OS=Homo sapiens GN=MCM5 PE=1 SV=5	D.RVGVGIRSSY.I	FALSE	10	P33992	MCM5	class I	AML14_DCB
674		>sp|P33992|MCM5_HUMAN DNA replication licensing factor MCM5 OS=Homo sapiens GN=MCM5 PE=1 SV=5	D.RVGVGIRSSY.I	FALSE	10	P33992	MCM5	class I	AML14_DCB
675		>sp|P33992|MCM5_HUMAN DNA replication licensing factor MCM5 OS=Homo sapiens GN=MCM5 PE=1 SV=5	D.RVGVGIRSSY.I	FALSE	10	P33992	MCM5	class I	AML14_DCB
676		>sp|P33992|MCM5_HUMAN DNA replication licensing factor MCM5 OS=Homo sapiens GN=MCM5 PE=1 SV=5	D.RVGVGIRSSY.I	FALSE	10	P33992	MCM5	class I	AML14_DCB
677		>sp|P33992|MCM5_HUMAN DNA replication licensing factor MCM5 OS=Homo sapiens GN=MCM5 PE=1 SV=5	L.AALPNVYEV.I	FALSE	9	P33992	MCM5	class I	AML14_DCB
678		>sp|P33992|MCM5_HUMAN DNA replication licensing factor MCM5 OS=Homo sapiens GN=MCM5 PE=1 SV=5	N.FIMEGGAMV.L	FALSE	9	P33992	MCM5	class I	AML14_DCB
679		>sp|P33992|MCM5_HUMAN DNA replication licensing factor MCM5 OS=Homo sapiens GN=MCM5 PE=1 SV=5	E.GEIDLAKLKKF.I	FALSE	11	P33992	MCM5	class I	AML14_DCB
680		>sp|P33992|MCM5_HUMAN DNA replication licensing factor MCM5 OS=Homo sapiens GN=MCM5 PE=1 SV=5	A.ALSGTLSGV.E	FALSE	9	P33992	MCM5	class I	AML14_DCB
681		>sp|P33992|MCM5_HUMAN DNA replication licensing factor MCM5 OS=Homo sapiens GN=MCM5 PE=1 SV=5	V.SEHSIIKDF.T	FALSE	9	P33992	MCM5	class I	AML14_DCB
682	.[+42]	>sp|P20700|LMNB1_HUMAN Lamin-B1 OS=Homo sapiens GN=LMNB1 PE=1 SV=2	M.[+42.011]ATATPVPPRMG.S	FALSE	11	P20700	LMNB1	class I	AML14_DCB
683	.[+42]	>sp|P20700|LMNB1_HUMAN Lamin-B1 OS=Homo sapiens GN=LMNB1 PE=1 SV=2	M.[+42.011]ATATPVPPRMG.S	FALSE	11	P20700	LMNB1	class I	AML14_DCB
684	.[+42]	>sp|P20700|LMNB1_HUMAN Lamin-B1 OS=Homo sapiens GN=LMNB1 PE=1 SV=2	M.[+42.011]ATATPVPPRMG.S	FALSE	11	P20700	LMNB1	class I	AML14_DCB
685	.[+42]	>sp|P20700|LMNB1_HUMAN Lamin-B1 OS=Homo sapiens GN=LMNB1 PE=1 SV=2	M.[+42.011]ATATPVPPRMG.S	FALSE	11	P20700	LMNB1	class I	AML14_DCB
686		>sp|P20700|LMNB1_HUMAN Lamin-B1 OS=Homo sapiens GN=LMNB1 PE=1 SV=2	D.RLAVYIDKV.R	FALSE	9	P20700	LMNB1	class I	AML14_DCB
687		>sp|P20700|LMNB1_HUMAN Lamin-B1 OS=Homo sapiens GN=LMNB1 PE=1 SV=2	D.RLAVYIDKV.R	FALSE	9	P20700	LMNB1	class I	AML14_DCB
688		>sp|P20700|LMNB1_HUMAN Lamin-B1 OS=Homo sapiens GN=LMNB1 PE=1 SV=2	D.RLAVYIDKV.R	FALSE	9	P20700	LMNB1	class I	AML14_DCB
689		>sp|P20700|LMNB1_HUMAN Lamin-B1 OS=Homo sapiens GN=LMNB1 PE=1 SV=2	D.RLAVYIDKV.R	FALSE	9	P20700	LMNB1	class I	AML14_DCB
690		>sp|P20700|LMNB1_HUMAN Lamin-B1 OS=Homo sapiens GN=LMNB1 PE=1 SV=2	A.VYIDKVRSL.E	FALSE	9	P20700	LMNB1	class I	AML14_DCB
691		>sp|P20700|LMNB1_HUMAN Lamin-B1 OS=Homo sapiens GN=LMNB1 PE=1 SV=2	A.VYIDKVRSL.E	FALSE	9	P20700	LMNB1	class I	AML14_DCB
692		>sp|P20700|LMNB1_HUMAN Lamin-B1 OS=Homo sapiens GN=LMNB1 PE=1 SV=2	A.VYIDKVRSL.E	FALSE	9	P20700	LMNB1	class I	AML14_DCB
693		>sp|P20700|LMNB1_HUMAN Lamin-B1 OS=Homo sapiens GN=LMNB1 PE=1 SV=2	A.ALNSKDAAL.A	FALSE	9	P20700	LMNB1	class I	AML14_DCB
694		>sp|P20700|LMNB1_HUMAN Lamin-B1 OS=Homo sapiens GN=LMNB1 PE=1 SV=2	R.KLLEGEEERLKL.S	FALSE	12	P20700	LMNB1	class I	AML14_DCB
695		>sp|P20700|LMNB1_HUMAN Lamin-B1 OS=Homo sapiens GN=LMNB1 PE=1 SV=2	D.LIWKNQNSW.G	FALSE	9	P20700	LMNB1	class I	AML14_DCB
696		>sp|P20700|LMNB1_HUMAN Lamin-B1 OS=Homo sapiens GN=LMNB1 PE=1 SV=2	D.LIWKNQNSW.G	FALSE	9	P20700	LMNB1	class I	AML14_DCB
697		>sp|Q99832|TCPH_HUMAN T-complex protein 1 subunit eta OS=Homo sapiens GN=CCT7 PE=1 SV=2	N.DGATILKL.L	FALSE	8	Q99832	CCT7	class I	AML14_DCB
698		>sp|Q99832|TCPH_HUMAN T-complex protein 1 subunit eta OS=Homo sapiens GN=CCT7 PE=1 SV=2	N.DGATILKL.L	FALSE	8	Q99832	CCT7	class I	AML14_DCB
699		>sp|Q99832|TCPH_HUMAN T-complex protein 1 subunit eta OS=Homo sapiens GN=CCT7 PE=1 SV=2	L.KLLDVVHPA.A	FALSE	9	Q99832	CCT7	class I	AML14_DCB
700		>sp|Q99832|TCPH_HUMAN T-complex protein 1 subunit eta OS=Homo sapiens GN=CCT7 PE=1 SV=2	N.ILYDKLEKI.H	FALSE	9	Q99832	CCT7	class I	AML14_DCB
701		>sp|Q99832|TCPH_HUMAN T-complex protein 1 subunit eta OS=Homo sapiens GN=CCT7 PE=1 SV=2	N.ILYDKLEKI.H	FALSE	9	Q99832	CCT7	class I	AML14_DCB
702		>sp|Q99832|TCPH_HUMAN T-complex protein 1 subunit eta OS=Homo sapiens GN=CCT7 PE=1 SV=2	R.SLHDAIMIV.R	FALSE	9	Q99832	CCT7	class I	AML14_DCB
703		>sp|Q99832|TCPH_HUMAN T-complex protein 1 subunit eta OS=Homo sapiens GN=CCT7 PE=1 SV=2	R.SLHDAIMIV.R	FALSE	9	Q99832	CCT7	class I	AML14_DCB
704		>sp|Q99832|TCPH_HUMAN T-complex protein 1 subunit eta OS=Homo sapiens GN=CCT7 PE=1 SV=2	R.SLHDAIMIV.R	FALSE	9	Q99832	CCT7	class I	AML14_DCB
705		>sp|Q99832|TCPH_HUMAN T-complex protein 1 subunit eta OS=Homo sapiens GN=CCT7 PE=1 SV=2	R.SLHDAIMIV.R	FALSE	9	Q99832	CCT7	class I	AML14_DCB
706	M[+16]	>sp|Q99832|TCPH_HUMAN T-complex protein 1 subunit eta OS=Homo sapiens GN=CCT7 PE=1 SV=2	R.SLHDAIM[+15.995]IV.R	FALSE	9	Q99832	CCT7	class I	AML14_DCB
707	M[+16]	>sp|Q99832|TCPH_HUMAN T-complex protein 1 subunit eta OS=Homo sapiens GN=CCT7 PE=1 SV=2	R.SLHDAIM[+15.995]IV.R	FALSE	9	Q99832	CCT7	class I	AML14_DCB
708	M[+16]	>sp|Q99832|TCPH_HUMAN T-complex protein 1 subunit eta OS=Homo sapiens GN=CCT7 PE=1 SV=2	R.SLHDAIM[+15.995]IV.R	FALSE	9	Q99832	CCT7	class I	AML14_DCB
709	M[+16]	>sp|Q99832|TCPH_HUMAN T-complex protein 1 subunit eta OS=Homo sapiens GN=CCT7 PE=1 SV=2	R.SLHDAIM[+15.995]IV.R	FALSE	9	Q99832	CCT7	class I	AML14_DCB
710		>sp|P51610|HCFC1_HUMAN Host cell factor 1 OS=Homo sapiens GN=HCFC1 PE=1 SV=2	G.TTNTATTAM.S	FALSE	9	P51610	HCFC1	class I	AML14_DCB
711		>sp|P51610|HCFC1_HUMAN Host cell factor 1 OS=Homo sapiens GN=HCFC1 PE=1 SV=2	L.LPDATSSHRTV.E	FALSE	11	P51610	HCFC1	class I	AML14_DCB
712		>sp|P51610|HCFC1_HUMAN Host cell factor 1 OS=Homo sapiens GN=HCFC1 PE=1 SV=2	L.LPDATSSHRTV.E	FALSE	11	P51610	HCFC1	class I	AML14_DCB
713		>sp|P51610|HCFC1_HUMAN Host cell factor 1 OS=Homo sapiens GN=HCFC1 PE=1 SV=2	L.LPDATSSHRTV.E	FALSE	11	P51610	HCFC1	class I	AML14_DCB
714		>sp|P51610|HCFC1_HUMAN Host cell factor 1 OS=Homo sapiens GN=HCFC1 PE=1 SV=2	L.LPDATSSHRTV.E	FALSE	11	P51610	HCFC1	class I	AML14_DCB
715		>sp|P51610|HCFC1_HUMAN Host cell factor 1 OS=Homo sapiens GN=HCFC1 PE=1 SV=2	L.LPDATSSHRTV.E	FALSE	11	P51610	HCFC1	class I	AML14_DCB
716		>sp|P51610|HCFC1_HUMAN Host cell factor 1 OS=Homo sapiens GN=HCFC1 PE=1 SV=2	L.LPDATSSHRTV.E	FALSE	11	P51610	HCFC1	class I	AML14_DCB
717		>sp|P51610|HCFC1_HUMAN Host cell factor 1 OS=Homo sapiens GN=HCFC1 PE=1 SV=2	L.PDATSSHRTV.E	FALSE	10	P51610	HCFC1	class I	AML14_DCB
718		>sp|P51610|HCFC1_HUMAN Host cell factor 1 OS=Homo sapiens GN=HCFC1 PE=1 SV=2	P.DATSSHRTV.E	FALSE	9	P51610	HCFC1	class I	AML14_DCB
719		>sp|P51610|HCFC1_HUMAN Host cell factor 1 OS=Homo sapiens GN=HCFC1 PE=1 SV=2	G.KIIEYSVYL.A	FALSE	9	P51610	HCFC1	class I	AML14_DCB
720		>sp|Q9Y5Q8|TF3C5_HUMAN General transcription factor 3C polypeptide 5 OS=Homo sapiens GN=GTF3C5 PE=1 SV=2	T.SMYDKVLML.R	FALSE	9	Q9Y5Q8	GTF3C5	class I	AML14_DCB
721		>sp|Q9Y5Q8|TF3C5_HUMAN General transcription factor 3C polypeptide 5 OS=Homo sapiens GN=GTF3C5 PE=1 SV=2	T.SMYDKVLML.R	FALSE	9	Q9Y5Q8	GTF3C5	class I	AML14_DCB
722	M[+16]	>sp|Q9Y5Q8|TF3C5_HUMAN General transcription factor 3C polypeptide 5 OS=Homo sapiens GN=GTF3C5 PE=1 SV=2	T.SMYDKVLM[+15.995]L.R	FALSE	9	Q9Y5Q8	GTF3C5	class I	AML14_DCB
723	M[+16]	>sp|Q9Y5Q8|TF3C5_HUMAN General transcription factor 3C polypeptide 5 OS=Homo sapiens GN=GTF3C5 PE=1 SV=2	T.SM[+15.995]YDKVLML.R	FALSE	9	Q9Y5Q8	GTF3C5	class I	AML14_DCB
724	M[+16]	>sp|Q9Y5Q8|TF3C5_HUMAN General transcription factor 3C polypeptide 5 OS=Homo sapiens GN=GTF3C5 PE=1 SV=2	T.SMYDKVLM[+15.995]L.R	FALSE	9	Q9Y5Q8	GTF3C5	class I	AML14_DCB
725	M[+16]	>sp|Q9Y5Q8|TF3C5_HUMAN General transcription factor 3C polypeptide 5 OS=Homo sapiens GN=GTF3C5 PE=1 SV=2	T.SM[+15.995]YDKVLML.R	FALSE	9	Q9Y5Q8	GTF3C5	class I	AML14_DCB
726	M[+16]	>sp|Q9Y5Q8|TF3C5_HUMAN General transcription factor 3C polypeptide 5 OS=Homo sapiens GN=GTF3C5 PE=1 SV=2	T.SMYDKVLM[+15.995]L.R	FALSE	9	Q9Y5Q8	GTF3C5	class I	AML14_DCB
727	M[+16]*2	>sp|Q9Y5Q8|TF3C5_HUMAN General transcription factor 3C polypeptide 5 OS=Homo sapiens GN=GTF3C5 PE=1 SV=2	T.SM[+15.995]YDKVLM[+15.995]L.R	FALSE	9	Q9Y5Q8	GTF3C5	class I	AML14_DCB
728	M[+16]*2	>sp|Q9Y5Q8|TF3C5_HUMAN General transcription factor 3C polypeptide 5 OS=Homo sapiens GN=GTF3C5 PE=1 SV=2	T.SM[+15.995]YDKVLM[+15.995]L.R	FALSE	9	Q9Y5Q8	GTF3C5	class I	AML14_DCB
729		>sp|Q9Y5Q8|TF3C5_HUMAN General transcription factor 3C polypeptide 5 OS=Homo sapiens GN=GTF3C5 PE=1 SV=2	R.KLFDIRPIW.S	FALSE	9	Q9Y5Q8	GTF3C5	class I	AML14_DCB
730		>sp|Q9Y5Q8|TF3C5_HUMAN General transcription factor 3C polypeptide 5 OS=Homo sapiens GN=GTF3C5 PE=1 SV=2	R.KLFDIRPIW.S	FALSE	9	Q9Y5Q8	GTF3C5	class I	AML14_DCB
731		>sp|Q9Y5Q8|TF3C5_HUMAN General transcription factor 3C polypeptide 5 OS=Homo sapiens GN=GTF3C5 PE=1 SV=2	R.KLFDIRPIW.S	FALSE	9	Q9Y5Q8	GTF3C5	class I	AML14_DCB
732		>sp|Q9Y5Q8|TF3C5_HUMAN General transcription factor 3C polypeptide 5 OS=Homo sapiens GN=GTF3C5 PE=1 SV=2	R.KLFDIRPIW.S	FALSE	9	Q9Y5Q8	GTF3C5	class I	AML14_DCB
733		>sp|Q9Y5Q8|TF3C5_HUMAN General transcription factor 3C polypeptide 5 OS=Homo sapiens GN=GTF3C5 PE=1 SV=2	Y.KLKDSVYIF.R	FALSE	9	Q9Y5Q8	GTF3C5	class I	AML14_DCB
734		>sp|Q9Y5Q8|TF3C5_HUMAN General transcription factor 3C polypeptide 5 OS=Homo sapiens GN=GTF3C5 PE=1 SV=2	Y.KLKDSVYIF.R	FALSE	9	Q9Y5Q8	GTF3C5	class I	AML14_DCB
735		>sp|P68104|EF1A1_HUMAN Elongation factor 1-alpha 1 OS=Homo sapiens GN=EEF1A1 PE=1 SV=1	K.STTTGHLIYK.C	FALSE	10	P68104	EEF1A1	class I	AML14_DCB
736		>sp|P68104|EF1A1_HUMAN Elongation factor 1-alpha 1 OS=Homo sapiens GN=EEF1A1 PE=1 SV=1	K.STTTGHLIYK.C	FALSE	10	P68104	EEF1A1	class I	AML14_DCB
737		>sp|P68104|EF1A1_HUMAN Elongation factor 1-alpha 1 OS=Homo sapiens GN=EEF1A1 PE=1 SV=1	K.STTTGHLIYK.C	FALSE	10	P68104	EEF1A1	class I	AML14_DCB
738		>sp|P68104|EF1A1_HUMAN Elongation factor 1-alpha 1 OS=Homo sapiens GN=EEF1A1 PE=1 SV=1	K.YYVTIIDAPGHR.D	FALSE	12	P68104	EEF1A1	class I	AML14_DCB
739		>sp|P68104|EF1A1_HUMAN Elongation factor 1-alpha 1 OS=Homo sapiens GN=EEF1A1 PE=1 SV=1	K.YYVTIIDAPGHR.D	FALSE	12	P68104	EEF1A1	class I	AML14_DCB
740		>sp|P68104|EF1A1_HUMAN Elongation factor 1-alpha 1 OS=Homo sapiens GN=EEF1A1 PE=1 SV=1	H.ALLAYTLGV.K	FALSE	9	P68104	EEF1A1	class I	AML14_DCB
741		>sp|P68104|EF1A1_HUMAN Elongation factor 1-alpha 1 OS=Homo sapiens GN=EEF1A1 PE=1 SV=1	G.DAAIVDMV.P	FALSE	8	P68104	EEF1A1	class I	AML14_DCB
742		>sp|P68104|EF1A1_HUMAN Elongation factor 1-alpha 1 OS=Homo sapiens GN=EEF1A1 PE=1 SV=1	G.DAAIVDMV.P	FALSE	8	P68104	EEF1A1	class I	AML14_DCB
743		>sp|P10242|MYB_HUMAN Transcriptional activator Myb OS=Homo sapiens GN=MYB PE=1 SV=2	Q.LPATGQPTV.N	FALSE	9	P10242	MYB	class I	AML14_DCB
744		>sp|P10242|MYB_HUMAN Transcriptional activator Myb OS=Homo sapiens GN=MYB PE=1 SV=2	Q.LPATGQPTV.N	FALSE	9	P10242	MYB	class I	AML14_DCB
745		>sp|P10242|MYB_HUMAN Transcriptional activator Myb OS=Homo sapiens GN=MYB PE=1 SV=2	Q.LPATGQPTV.N	FALSE	9	P10242	MYB	class I	AML14_DCB
746		>sp|P10242|MYB_HUMAN Transcriptional activator Myb OS=Homo sapiens GN=MYB PE=1 SV=2	N.VPQPAAAAI.Q	FALSE	9	P10242	MYB	class I	AML14_DCB
747		>sp|P10242|MYB_HUMAN Transcriptional activator Myb OS=Homo sapiens GN=MYB PE=1 SV=2	S.YPGWHSTTI.A	FALSE	9	P10242	MYB	class I	AML14_DCB
748		>sp|P10242|MYB_HUMAN Transcriptional activator Myb OS=Homo sapiens GN=MYB PE=1 SV=2	S.YPGWHSTTI.A	FALSE	9	P10242	MYB	class I	AML14_DCB
749		>sp|P10242|MYB_HUMAN Transcriptional activator Myb OS=Homo sapiens GN=MYB PE=1 SV=2	S.DESGIVAEF.Q	FALSE	9	P10242	MYB	class I	AML14_DCB
750		>sp|P10242|MYB_HUMAN Transcriptional activator Myb OS=Homo sapiens GN=MYB PE=1 SV=2	M.EEQMTSSSQARKY.V	FALSE	13	P10242	MYB	class I	AML14_DCB
751	M[+16]	>sp|P10242|MYB_HUMAN Transcriptional activator Myb OS=Homo sapiens GN=MYB PE=1 SV=2	M.EEQM[+15.995]TSSSQARKY.V	FALSE	13	P10242	MYB	class I	AML14_DCB
752		>sp|Q15149|PLEC_HUMAN Plectin OS=Homo sapiens GN=PLEC PE=1 SV=3	D.ALLQSDVRL.L	FALSE	9	Q15149	PLEC	class I	AML14_DCB
753		>sp|Q15149|PLEC_HUMAN Plectin OS=Homo sapiens GN=PLEC PE=1 SV=3	E.RLVAIRTEY.N	FALSE	9	Q15149	PLEC	class I	AML14_DCB
754		>sp|Q15149|PLEC_HUMAN Plectin OS=Homo sapiens GN=PLEC PE=1 SV=3	E.RLVAIRTEY.N	FALSE	9	Q15149	PLEC	class I	AML14_DCB
755		>sp|Q15149|PLEC_HUMAN Plectin OS=Homo sapiens GN=PLEC PE=1 SV=3	R.AEQESARQL.Q	FALSE	9	Q15149	PLEC	class I	AML14_DCB
756		>sp|Q15149|PLEC_HUMAN Plectin OS=Homo sapiens GN=PLEC PE=1 SV=3	K.DPYTGQQI.S	FALSE	8	Q15149	PLEC	class I	AML14_DCB
757		>sp|Q15149|PLEC_HUMAN Plectin OS=Homo sapiens GN=PLEC PE=1 SV=3	R.DPYTGQSV.S	FALSE	8	Q15149	PLEC	class I	AML14_DCB
758		>sp|Q15149|PLEC_HUMAN Plectin OS=Homo sapiens GN=PLEC PE=1 SV=3	R.DPYSGSTI.S	FALSE	8	Q15149	PLEC	class I	AML14_DCB
759		>sp|Q15149|PLEC_HUMAN Plectin OS=Homo sapiens GN=PLEC PE=1 SV=3	G.FLLDPVKGERL.T	FALSE	11	Q15149	PLEC	class I	AML14_DCB
760		>sp|Q15149|PLEC_HUMAN Plectin OS=Homo sapiens GN=PLEC PE=1 SV=3	K.GLIDHQTYL.E	FALSE	9	Q15149	PLEC	class I	AML14_DCB
761		>sp|Q15149|PLEC_HUMAN Plectin OS=Homo sapiens GN=PLEC PE=1 SV=3	K.GLIDHQTYL.E	FALSE	9	Q15149	PLEC	class I	AML14_DCB
762		>sp|Q9UGL1|KDM5B_HUMAN Lysine-specific demethylase 5B OS=Homo sapiens GN=KDM5B PE=1 SV=3	A.DPFAFIHKI.R	FALSE	9	Q9UGL1	KDM5B	class I	AML14_DCB
763		>sp|Q9UGL1|KDM5B_HUMAN Lysine-specific demethylase 5B OS=Homo sapiens GN=KDM5B PE=1 SV=3	A.DPFAFIHKI.R	FALSE	9	Q9UGL1	KDM5B	class I	AML14_DCB
764		>sp|Q9UGL1|KDM5B_HUMAN Lysine-specific demethylase 5B OS=Homo sapiens GN=KDM5B PE=1 SV=3	A.DPFAFIHKI.R	FALSE	9	Q9UGL1	KDM5B	class I	AML14_DCB
765		>sp|Q9UGL1|KDM5B_HUMAN Lysine-specific demethylase 5B OS=Homo sapiens GN=KDM5B PE=1 SV=3	A.DPFAFIHKI.R	FALSE	9	Q9UGL1	KDM5B	class I	AML14_DCB
766		>sp|Q9UGL1|KDM5B_HUMAN Lysine-specific demethylase 5B OS=Homo sapiens GN=KDM5B PE=1 SV=3	A.DPFAFIHKI.R	FALSE	9	Q9UGL1	KDM5B	class I	AML14_DCB
767		>sp|Q9UGL1|KDM5B_HUMAN Lysine-specific demethylase 5B OS=Homo sapiens GN=KDM5B PE=1 SV=3	A.DPFAFIHKI.R	FALSE	9	Q9UGL1	KDM5B	class I	AML14_DCB
768		>sp|Q9UGL1|KDM5B_HUMAN Lysine-specific demethylase 5B OS=Homo sapiens GN=KDM5B PE=1 SV=3	A.DPFAFIHKI.R	FALSE	9	Q9UGL1	KDM5B	class I	AML14_DCB
769		>sp|Q9UGL1|KDM5B_HUMAN Lysine-specific demethylase 5B OS=Homo sapiens GN=KDM5B PE=1 SV=3	D.PFAFIHKI.R	FALSE	8	Q9UGL1	KDM5B	class I	AML14_DCB
770		>sp|Q9UGL1|KDM5B_HUMAN Lysine-specific demethylase 5B OS=Homo sapiens GN=KDM5B PE=1 SV=3	D.PFAFIHKI.R	FALSE	8	Q9UGL1	KDM5B	class I	AML14_DCB
771		>sp|Q9UGL1|KDM5B_HUMAN Lysine-specific demethylase 5B OS=Homo sapiens GN=KDM5B PE=1 SV=3	D.PFAFIHKI.R	FALSE	8	Q9UGL1	KDM5B	class I	AML14_DCB
772		>sp|Q9UGL1|KDM5B_HUMAN Lysine-specific demethylase 5B OS=Homo sapiens GN=KDM5B PE=1 SV=3	D.PFAFIHKI.R	FALSE	8	Q9UGL1	KDM5B	class I	AML14_DCB
773		>sp|Q9UGL1|KDM5B_HUMAN Lysine-specific demethylase 5B OS=Homo sapiens GN=KDM5B PE=1 SV=3	S.VLAHITADI.C	FALSE	9	Q9UGL1	KDM5B	class I	AML14_DCB
774		>sp|Q9UGL1|KDM5B_HUMAN Lysine-specific demethylase 5B OS=Homo sapiens GN=KDM5B PE=1 SV=3	R.RLIDLGVGL.A	FALSE	9	Q9UGL1	KDM5B	class I	AML14_DCB
775		>sp|Q9UGL1|KDM5B_HUMAN Lysine-specific demethylase 5B OS=Homo sapiens GN=KDM5B PE=1 SV=3	R.RLIDLGVGL.A	FALSE	9	Q9UGL1	KDM5B	class I	AML14_DCB
776		>sp|Q9UGL1|KDM5B_HUMAN Lysine-specific demethylase 5B OS=Homo sapiens GN=KDM5B PE=1 SV=3	R.RLIDLGVGL.A	FALSE	9	Q9UGL1	KDM5B	class I	AML14_DCB
777		>sp|B5ME19|EIFCL_HUMAN Eukaryotic translation initiation factor 3 subunit C-like protein OS=Homo sapiens GN=EIF3CL PE=3 SV=1	L.EEFELLGKAY.G	FALSE	10	B5ME19	EIF3CL	class I	AML14_DCB
778		>sp|B5ME19|EIFCL_HUMAN Eukaryotic translation initiation factor 3 subunit C-like protein OS=Homo sapiens GN=EIF3CL PE=3 SV=1	L.EEFELLGKAY.G	FALSE	10	B5ME19	EIF3CL	class I	AML14_DCB
779		>sp|B5ME19|EIFCL_HUMAN Eukaryotic translation initiation factor 3 subunit C-like protein OS=Homo sapiens GN=EIF3CL PE=3 SV=1	K.SEAPSGESRKF.L	FALSE	11	B5ME19	EIF3CL	class I	AML14_DCB
780		>sp|B5ME19|EIFCL_HUMAN Eukaryotic translation initiation factor 3 subunit C-like protein OS=Homo sapiens GN=EIF3CL PE=3 SV=1	K.SEAPSGESRKF.L	FALSE	11	B5ME19	EIF3CL	class I	AML14_DCB
781		>sp|B5ME19|EIFCL_HUMAN Eukaryotic translation initiation factor 3 subunit C-like protein OS=Homo sapiens GN=EIF3CL PE=3 SV=1	K.SEAPSGESRKF.L	FALSE	11	B5ME19	EIF3CL	class I	AML14_DCB
782		>sp|B5ME19|EIFCL_HUMAN Eukaryotic translation initiation factor 3 subunit C-like protein OS=Homo sapiens GN=EIF3CL PE=3 SV=1	A.SLYDYNPNL.A	FALSE	9	B5ME19	EIF3CL	class I	AML14_DCB
783		>sp|B5ME19|EIFCL_HUMAN Eukaryotic translation initiation factor 3 subunit C-like protein OS=Homo sapiens GN=EIF3CL PE=3 SV=1	A.SLYDYNPNL.A	FALSE	9	B5ME19	EIF3CL	class I	AML14_DCB
784		>sp|B5ME19|EIFCL_HUMAN Eukaryotic translation initiation factor 3 subunit C-like protein OS=Homo sapiens GN=EIF3CL PE=3 SV=1	A.SLYDYNPNL.A	FALSE	9	B5ME19	EIF3CL	class I	AML14_DCB
785		>sp|B5ME19|EIFCL_HUMAN Eukaryotic translation initiation factor 3 subunit C-like protein OS=Homo sapiens GN=EIF3CL PE=3 SV=1	A.SLYDYNPNL.A	FALSE	9	B5ME19	EIF3CL	class I	AML14_DCB
786		>sp|B5ME19|EIFCL_HUMAN Eukaryotic translation initiation factor 3 subunit C-like protein OS=Homo sapiens GN=EIF3CL PE=3 SV=1	L.ATYMKPEMW.G	FALSE	9	B5ME19	EIF3CL	class I	AML14_DCB
787		>sp|B5ME19|EIFCL_HUMAN Eukaryotic translation initiation factor 3 subunit C-like protein OS=Homo sapiens GN=EIF3CL PE=3 SV=1	L.ATYMKPEMW.G	FALSE	9	B5ME19	EIF3CL	class I	AML14_DCB
788		>sp|B5ME19|EIFCL_HUMAN Eukaryotic translation initiation factor 3 subunit C-like protein OS=Homo sapiens GN=EIF3CL PE=3 SV=1	H.NADQPLRV.R	FALSE	8	B5ME19	EIF3CL	class I	AML14_DCB
789		>sp|B5ME19|EIFCL_HUMAN Eukaryotic translation initiation factor 3 subunit C-like protein OS=Homo sapiens GN=EIF3CL PE=3 SV=1	D.LPTVHSII.S	FALSE	8	B5ME19	EIF3CL	class I	AML14_DCB
790		>sp|B5ME19|EIFCL_HUMAN Eukaryotic translation initiation factor 3 subunit C-like protein OS=Homo sapiens GN=EIF3CL PE=3 SV=1	A.SLDQPTQTV.V	FALSE	9	B5ME19	EIF3CL	class I	AML14_DCB
791		>sp|B5ME19|EIFCL_HUMAN Eukaryotic translation initiation factor 3 subunit C-like protein OS=Homo sapiens GN=EIF3CL PE=3 SV=1	A.SLDQPTQTV.V	FALSE	9	B5ME19	EIF3CL	class I	AML14_DCB
792		>sp|B5ME19|EIFCL_HUMAN Eukaryotic translation initiation factor 3 subunit C-like protein OS=Homo sapiens GN=EIF3CL PE=3 SV=1	A.SLDQPTQTV.V	FALSE	9	B5ME19	EIF3CL	class I	AML14_DCB
793		>sp|Q14203|DCTN1_HUMAN Dynactin subunit 1 OS=Homo sapiens GN=DCTN1 PE=1 SV=3	E.ALKERVDEL.T	FALSE	9	Q14203	DCTN1	class I	AML14_DCB
794		>sp|Q14203|DCTN1_HUMAN Dynactin subunit 1 OS=Homo sapiens GN=DCTN1 PE=1 SV=3	S.LPPLHVAKL.S	FALSE	9	Q14203	DCTN1	class I	AML14_DCB
795		>sp|Q14203|DCTN1_HUMAN Dynactin subunit 1 OS=Homo sapiens GN=DCTN1 PE=1 SV=3	S.LPPLHVAKL.S	FALSE	9	Q14203	DCTN1	class I	AML14_DCB
796		>sp|Q14203|DCTN1_HUMAN Dynactin subunit 1 OS=Homo sapiens GN=DCTN1 PE=1 SV=3	S.LPPLHVAKL.S	FALSE	9	Q14203	DCTN1	class I	AML14_DCB
797		>sp|Q14203|DCTN1_HUMAN Dynactin subunit 1 OS=Homo sapiens GN=DCTN1 PE=1 SV=3	A.QLMEQVAQL.K	FALSE	9	Q14203	DCTN1	class I	AML14_DCB
798		>sp|Q14203|DCTN1_HUMAN Dynactin subunit 1 OS=Homo sapiens GN=DCTN1 PE=1 SV=3	A.QLMEQVAQL.K	FALSE	9	Q14203	DCTN1	class I	AML14_DCB
799		>sp|Q14203|DCTN1_HUMAN Dynactin subunit 1 OS=Homo sapiens GN=DCTN1 PE=1 SV=3	A.QLMEQVAQL.K	FALSE	9	Q14203	DCTN1	class I	AML14_DCB
800	M[+16]	>sp|Q14203|DCTN1_HUMAN Dynactin subunit 1 OS=Homo sapiens GN=DCTN1 PE=1 SV=3	A.QLM[+15.995]EQVAQL.K	FALSE	9	Q14203	DCTN1	class I	AML14_DCB
801		>sp|Q14203|DCTN1_HUMAN Dynactin subunit 1 OS=Homo sapiens GN=DCTN1 PE=1 SV=3	K.SLSDTVEKL.K	FALSE	9	Q14203	DCTN1	class I	AML14_DCB
802		>sp|Q14203|DCTN1_HUMAN Dynactin subunit 1 OS=Homo sapiens GN=DCTN1 PE=1 SV=3	K.SLSDTVEKL.K	FALSE	9	Q14203	DCTN1	class I	AML14_DCB
803		>sp|Q14008|CKAP5_HUMAN Cytoskeleton-associated protein 5 OS=Homo sapiens GN=CKAP5 PE=1 SV=3	R.DALRPPLQNI.N	FALSE	10	Q14008	CKAP5	class I	AML14_DCB
804		>sp|Q14008|CKAP5_HUMAN Cytoskeleton-associated protein 5 OS=Homo sapiens GN=CKAP5 PE=1 SV=3	R.DALRPPLQNI.N	FALSE	10	Q14008	CKAP5	class I	AML14_DCB
805		>sp|Q14008|CKAP5_HUMAN Cytoskeleton-associated protein 5 OS=Homo sapiens GN=CKAP5 PE=1 SV=3	K.HINDSAPEV.R	FALSE	9	Q14008	CKAP5	class I	AML14_DCB
806		>sp|Q14008|CKAP5_HUMAN Cytoskeleton-associated protein 5 OS=Homo sapiens GN=CKAP5 PE=1 SV=3	K.HINDSAPEV.R	FALSE	9	Q14008	CKAP5	class I	AML14_DCB
807		>sp|Q14008|CKAP5_HUMAN Cytoskeleton-associated protein 5 OS=Homo sapiens GN=CKAP5 PE=1 SV=3	K.HINDSAPEV.R	FALSE	9	Q14008	CKAP5	class I	AML14_DCB
808		>sp|Q14008|CKAP5_HUMAN Cytoskeleton-associated protein 5 OS=Homo sapiens GN=CKAP5 PE=1 SV=3	M.LPWTAEQVV.S	FALSE	9	Q14008	CKAP5	class I	AML14_DCB
809		>sp|Q14008|CKAP5_HUMAN Cytoskeleton-associated protein 5 OS=Homo sapiens GN=CKAP5 PE=1 SV=3	M.LPWTAEQVV.S	FALSE	9	Q14008	CKAP5	class I	AML14_DCB
810		>sp|Q14008|CKAP5_HUMAN Cytoskeleton-associated protein 5 OS=Homo sapiens GN=CKAP5 PE=1 SV=3	M.LPWTAEQVV.S	FALSE	9	Q14008	CKAP5	class I	AML14_DCB
811		>sp|Q14008|CKAP5_HUMAN Cytoskeleton-associated protein 5 OS=Homo sapiens GN=CKAP5 PE=1 SV=3	M.LPWTAEQVV.S	FALSE	9	Q14008	CKAP5	class I	AML14_DCB
812		>sp|Q14008|CKAP5_HUMAN Cytoskeleton-associated protein 5 OS=Homo sapiens GN=CKAP5 PE=1 SV=3	G.WLAEKLPTL.R	FALSE	9	Q14008	CKAP5	class I	AML14_DCB
813		>sp|Q14008|CKAP5_HUMAN Cytoskeleton-associated protein 5 OS=Homo sapiens GN=CKAP5 PE=1 SV=3	L.RFFDTNTSVL.M	FALSE	10	Q14008	CKAP5	class I	AML14_DCB
814		>sp|Q14008|CKAP5_HUMAN Cytoskeleton-associated protein 5 OS=Homo sapiens GN=CKAP5 PE=1 SV=3	F.IPYLVVKV.G	FALSE	8	Q14008	CKAP5	class I	AML14_DCB
815		>sp|Q14008|CKAP5_HUMAN Cytoskeleton-associated protein 5 OS=Homo sapiens GN=CKAP5 PE=1 SV=3	F.IPYLVVKV.G	FALSE	8	Q14008	CKAP5	class I	AML14_DCB
816		>sp|P26373|RL13_HUMAN 60S ribosomal protein L13 OS=Homo sapiens GN=RPL13 PE=1 SV=4	K.KGDSSAEEL.K	FALSE	9	P26373	RPL13	class I	AML14_DCB
817		>sp|P26373|RL13_HUMAN 60S ribosomal protein L13 OS=Homo sapiens GN=RPL13 PE=1 SV=4	I.TEEEKNFKAF.A	FALSE	10	P26373	RPL13	class I	AML14_DCB
818		>sp|P26373|RL13_HUMAN 60S ribosomal protein L13 OS=Homo sapiens GN=RPL13 PE=1 SV=4	T.EEEKNFKAF.A	FALSE	9	P26373	RPL13	class I	AML14_DCB
819		>sp|P26373|RL13_HUMAN 60S ribosomal protein L13 OS=Homo sapiens GN=RPL13 PE=1 SV=4	T.EEEKNFKAF.A	FALSE	9	P26373	RPL13	class I	AML14_DCB
820		>sp|P26373|RL13_HUMAN 60S ribosomal protein L13 OS=Homo sapiens GN=RPL13 PE=1 SV=4	K.EAAEQDVEK.K	FALSE	9	P26373	RPL13	class I	AML14_DCB
821		>sp|Q13748|TBA3C_HUMAN Tubulin alpha-3C/D chain OS=Homo sapiens GN=TUBA3C PE=1 SV=3	K.EDAANNYAR.G	FALSE	9	Q13748	TUBA3C	class I	AML14_DCB
822		>sp|Q13748|TBA3C_HUMAN Tubulin alpha-3C/D chain OS=Homo sapiens GN=TUBA3C PE=1 SV=3	K.EDAANNYAR.G	FALSE	9	Q13748	TUBA3C	class I	AML14_DCB
823		>sp|Q13748|TBA3C_HUMAN Tubulin alpha-3C/D chain OS=Homo sapiens GN=TUBA3C PE=1 SV=3	V.EPYNSILTT.H	FALSE	9	Q13748	TUBA3C	class I	AML14_DCB
824		>sp|Q13748|TBA3C_HUMAN Tubulin alpha-3C/D chain OS=Homo sapiens GN=TUBA3C PE=1 SV=3	V.EPYNSILTT.H	FALSE	9	Q13748	TUBA3C	class I	AML14_DCB
825		>sp|Q13748|TBA3C_HUMAN Tubulin alpha-3C/D chain OS=Homo sapiens GN=TUBA3C PE=1 SV=3	S.AEKAYHEQL.S	FALSE	9	Q13748	TUBA3C	class I	AML14_DCB
826		>sp|Q13748|TBA3C_HUMAN Tubulin alpha-3C/D chain OS=Homo sapiens GN=TUBA3C PE=1 SV=3	K.DVNAAIATIK.T	FALSE	10	Q13748	TUBA3C	class I	AML14_DCB
827		>sp|Q13748|TBA3C_HUMAN Tubulin alpha-3C/D chain OS=Homo sapiens GN=TUBA3C PE=1 SV=3	K.VGINYQPPTVVPGGDLAK.V	FALSE	18	Q13748	TUBA3C	class I	AML14_DCB
828		>sp|P07900|HS90A_HUMAN Heat shock protein HSP 90-alpha OS=Homo sapiens GN=HSP90AA1 PE=1 SV=5	R.ELISNSSDALDK.I	FALSE	12	P07900	HSP90AA1	class I	AML14_DCB
829		>sp|P07900|HS90A_HUMAN Heat shock protein HSP 90-alpha OS=Homo sapiens GN=HSP90AA1 PE=1 SV=5	R.NPDDITNEEYGEFYK.S	FALSE	15	P07900	HSP90AA1	class I	AML14_DCB
830		>sp|P07900|HS90A_HUMAN Heat shock protein HSP 90-alpha OS=Homo sapiens GN=HSP90AA1 PE=1 SV=5	K.LGIHEDSQNRK.K	FALSE	11	P07900	HSP90AA1	class I	AML14_DCB
831		>sp|P07900|HS90A_HUMAN Heat shock protein HSP 90-alpha OS=Homo sapiens GN=HSP90AA1 PE=1 SV=5	K.HIYYITGETK.D	FALSE	10	P07900	HSP90AA1	class I	AML14_DCB
832		>sp|P07900|HS90A_HUMAN Heat shock protein HSP 90-alpha OS=Homo sapiens GN=HSP90AA1 PE=1 SV=5	K.HIYYITGETK.D	FALSE	10	P07900	HSP90AA1	class I	AML14_DCB
833		>sp|P07900|HS90A_HUMAN Heat shock protein HSP 90-alpha OS=Homo sapiens GN=HSP90AA1 PE=1 SV=5	K.DQVANSAFVER.L	FALSE	11	P07900	HSP90AA1	class I	AML14_DCB
834		>sp|P07900|HS90A_HUMAN Heat shock protein HSP 90-alpha OS=Homo sapiens GN=HSP90AA1 PE=1 SV=5	D.ILEKKVEKV.V	FALSE	9	P07900	HSP90AA1	class I	AML14_DCB
835		>sp|P07900|HS90A_HUMAN Heat shock protein HSP 90-alpha OS=Homo sapiens GN=HSP90AA1 PE=1 SV=5	D.ILEKKVEKV.V	FALSE	9	P07900	HSP90AA1	class I	AML14_DCB
836		>sp|Q9Y230|RUVB2_HUMAN RuvB-like 2 OS=Homo sapiens GN=RUVBL2 PE=1 SV=3	E.QINAKVAEW.R	FALSE	9	Q9Y230	RUVBL2	class I	AML14_DCB
837		>sp|Q9Y230|RUVB2_HUMAN RuvB-like 2 OS=Homo sapiens GN=RUVBL2 PE=1 SV=3	E.DAYTVLTRI.G	FALSE	9	Q9Y230	RUVBL2	class I	AML14_DCB
838		>sp|Q9Y230|RUVB2_HUMAN RuvB-like 2 OS=Homo sapiens GN=RUVBL2 PE=1 SV=3	E.DAYTVLTRI.G	FALSE	9	Q9Y230	RUVBL2	class I	AML14_DCB
839		>sp|Q9Y230|RUVB2_HUMAN RuvB-like 2 OS=Homo sapiens GN=RUVBL2 PE=1 SV=3	E.DAYTVLTRI.G	FALSE	9	Q9Y230	RUVBL2	class I	AML14_DCB
840		>sp|Q9Y230|RUVB2_HUMAN RuvB-like 2 OS=Homo sapiens GN=RUVBL2 PE=1 SV=3	E.DAYTVLTRI.G	FALSE	9	Q9Y230	RUVBL2	class I	AML14_DCB
841		>sp|Q9Y230|RUVB2_HUMAN RuvB-like 2 OS=Homo sapiens GN=RUVBL2 PE=1 SV=3	L.FLDESRSTQYM.K	FALSE	11	Q9Y230	RUVBL2	class I	AML14_DCB
842		>sp|Q9Y230|RUVB2_HUMAN RuvB-like 2 OS=Homo sapiens GN=RUVBL2 PE=1 SV=3	L.FLDESRSTQYM.K	FALSE	11	Q9Y230	RUVBL2	class I	AML14_DCB
843	M[+16]	>sp|Q9Y230|RUVB2_HUMAN RuvB-like 2 OS=Homo sapiens GN=RUVBL2 PE=1 SV=3	L.FLDESRSTQYM[+15.995].K	FALSE	11	Q9Y230	RUVBL2	class I	AML14_DCB
844	M[+16]	>sp|Q9Y230|RUVB2_HUMAN RuvB-like 2 OS=Homo sapiens GN=RUVBL2 PE=1 SV=3	L.FLDESRSTQYM[+15.995].K	FALSE	11	Q9Y230	RUVBL2	class I	AML14_DCB
845	.[+42]	>sp|P10412|H14_HUMAN Histone H1.4 OS=Homo sapiens GN=HIST1H1E PE=1 SV=2	M.[+42.011]SETAPAAPAAPAPAEK.T	FALSE	16	P10412	HIST1H1E	class I	AML14_DCB
846		>sp|P10412|H14_HUMAN Histone H1.4 OS=Homo sapiens GN=HIST1H1E PE=1 SV=2	K.ASGPPVSELITK.A	FALSE	12	P10412	HIST1H1E	class I	AML14_DCB
847		>sp|P10412|H14_HUMAN Histone H1.4 OS=Homo sapiens GN=HIST1H1E PE=1 SV=2	K.ASGPPVSELITK.A	FALSE	12	P10412	HIST1H1E	class I	AML14_DCB
848		>sp|P10412|H14_HUMAN Histone H1.4 OS=Homo sapiens GN=HIST1H1E PE=1 SV=2	K.ALAAAGYDVEK.N	FALSE	11	P10412	HIST1H1E	class I	AML14_DCB
849		>sp|P10412|H14_HUMAN Histone H1.4 OS=Homo sapiens GN=HIST1H1E PE=1 SV=2	K.GTGASGSFK.L	FALSE	9	P10412	HIST1H1E	class I	AML14_DCB
850		>sp|P04632|CPNS1_HUMAN Calpain small subunit 1 OS=Homo sapiens GN=CAPNS1 PE=1 SV=1	M.RILGGVISAI.S	FALSE	10	P04632	CAPNS1	class I	AML14_DCB
851		>sp|P04632|CPNS1_HUMAN Calpain small subunit 1 OS=Homo sapiens GN=CAPNS1 PE=1 SV=1	V.AVMDSDTTGKLGF.E	FALSE	13	P04632	CAPNS1	class I	AML14_DCB
852		>sp|P04632|CPNS1_HUMAN Calpain small subunit 1 OS=Homo sapiens GN=CAPNS1 PE=1 SV=1	V.AVMDSDTTGKLGF.E	FALSE	13	P04632	CAPNS1	class I	AML14_DCB
853	M[+16]	>sp|P04632|CPNS1_HUMAN Calpain small subunit 1 OS=Homo sapiens GN=CAPNS1 PE=1 SV=1	V.AVM[+15.995]DSDTTGKLGF.E	FALSE	13	P04632	CAPNS1	class I	AML14_DCB
854		>sp|Q96AE7-2|TTC17_HUMAN Isoform 2 of Tetratricopeptide repeat protein 17 OS=Homo sapiens GN=TTC17	K.HPHDLVILM.R	FALSE	9	Q96AE7-2	TTC17	class I	AML14_DCB
855		>sp|Q96AE7-2|TTC17_HUMAN Isoform 2 of Tetratricopeptide repeat protein 17 OS=Homo sapiens GN=TTC17	K.HPHDLVILM.R	FALSE	9	Q96AE7-2	TTC17	class I	AML14_DCB
856		>sp|Q96AE7-2|TTC17_HUMAN Isoform 2 of Tetratricopeptide repeat protein 17 OS=Homo sapiens GN=TTC17	S.DAYRDKQHI.L	FALSE	9	Q96AE7-2	TTC17	class I	AML14_DCB
857		>sp|Q96AE7-2|TTC17_HUMAN Isoform 2 of Tetratricopeptide repeat protein 17 OS=Homo sapiens GN=TTC17	K.MPDDHARKI.L	FALSE	9	Q96AE7-2	TTC17	class I	AML14_DCB
858		>sp|Q96AE7-2|TTC17_HUMAN Isoform 2 of Tetratricopeptide repeat protein 17 OS=Homo sapiens GN=TTC17	K.MPDDHARKI.L	FALSE	9	Q96AE7-2	TTC17	class I	AML14_DCB
859		>sp|Q96AE7-2|TTC17_HUMAN Isoform 2 of Tetratricopeptide repeat protein 17 OS=Homo sapiens GN=TTC17	K.MPDDHARKI.L	FALSE	9	Q96AE7-2	TTC17	class I	AML14_DCB
860	M[+16]	>sp|Q96AE7-2|TTC17_HUMAN Isoform 2 of Tetratricopeptide repeat protein 17 OS=Homo sapiens GN=TTC17	K.M[+15.995]PDDHARKI.L	FALSE	9	Q96AE7-2	TTC17	class I	AML14_DCB
861	M[+16]	>sp|Q96AE7-2|TTC17_HUMAN Isoform 2 of Tetratricopeptide repeat protein 17 OS=Homo sapiens GN=TTC17	K.M[+15.995]PDDHARKI.L	FALSE	9	Q96AE7-2	TTC17	class I	AML14_DCB
862	M[+16]	>sp|Q96AE7-2|TTC17_HUMAN Isoform 2 of Tetratricopeptide repeat protein 17 OS=Homo sapiens GN=TTC17	K.M[+15.995]PDDHARKI.L	FALSE	9	Q96AE7-2	TTC17	class I	AML14_DCB
863	M[+16]	>sp|Q96AE7-2|TTC17_HUMAN Isoform 2 of Tetratricopeptide repeat protein 17 OS=Homo sapiens GN=TTC17	K.M[+15.995]PDDHARKI.L	FALSE	9	Q96AE7-2	TTC17	class I	AML14_DCB
864		>sp|Q96AE7-2|TTC17_HUMAN Isoform 2 of Tetratricopeptide repeat protein 17 OS=Homo sapiens GN=TTC17	M.PDDHARKI.L	FALSE	8	Q96AE7-2	TTC17	class I	AML14_DCB
865		>sp|Q96AE7-2|TTC17_HUMAN Isoform 2 of Tetratricopeptide repeat protein 17 OS=Homo sapiens GN=TTC17	M.PDDHARKI.L	FALSE	8	Q96AE7-2	TTC17	class I	AML14_DCB
866		>sp|Q96AE7-2|TTC17_HUMAN Isoform 2 of Tetratricopeptide repeat protein 17 OS=Homo sapiens GN=TTC17	L.HLDATKLLL.Q	FALSE	9	Q96AE7-2	TTC17	class I	AML14_DCB
867		>sp|Q96AE7-2|TTC17_HUMAN Isoform 2 of Tetratricopeptide repeat protein 17 OS=Homo sapiens GN=TTC17	L.HLDATKLLL.Q	FALSE	9	Q96AE7-2	TTC17	class I	AML14_DCB
868		>sp|Q96AE7-2|TTC17_HUMAN Isoform 2 of Tetratricopeptide repeat protein 17 OS=Homo sapiens GN=TTC17	L.HLDATKLLL.Q	FALSE	9	Q96AE7-2	TTC17	class I	AML14_DCB
869		>sp|Q96AE7-2|TTC17_HUMAN Isoform 2 of Tetratricopeptide repeat protein 17 OS=Homo sapiens GN=TTC17	Q.KYFDNSQSL.D	FALSE	9	Q96AE7-2	TTC17	class I	AML14_DCB
870		>sp|O14777|NDC80_HUMAN Kinetochore protein NDC80 homolog OS=Homo sapiens GN=NDC80 PE=1 SV=1	E.SFMSGADSF.D	FALSE	9	O14777	NDC80	class I	AML14_DCB
871		>sp|O14777|NDC80_HUMAN Kinetochore protein NDC80 homolog OS=Homo sapiens GN=NDC80 PE=1 SV=1	R.ALNEQIARL.E	FALSE	9	O14777	NDC80	class I	AML14_DCB
872		>sp|O14777|NDC80_HUMAN Kinetochore protein NDC80 homolog OS=Homo sapiens GN=NDC80 PE=1 SV=1	R.ALNEQIARL.E	FALSE	9	O14777	NDC80	class I	AML14_DCB
873		>sp|O14777|NDC80_HUMAN Kinetochore protein NDC80 homolog OS=Homo sapiens GN=NDC80 PE=1 SV=1	R.ALNEQIARL.E	FALSE	9	O14777	NDC80	class I	AML14_DCB
874		>sp|O14777|NDC80_HUMAN Kinetochore protein NDC80 homolog OS=Homo sapiens GN=NDC80 PE=1 SV=1	R.ALNEQIARL.E	FALSE	9	O14777	NDC80	class I	AML14_DCB
875		>sp|O14777|NDC80_HUMAN Kinetochore protein NDC80 homolog OS=Homo sapiens GN=NDC80 PE=1 SV=1	R.ALNEQIARL.E	FALSE	9	O14777	NDC80	class I	AML14_DCB
876		>sp|O14777|NDC80_HUMAN Kinetochore protein NDC80 homolog OS=Homo sapiens GN=NDC80 PE=1 SV=1	N.GLNEEIARV.E	FALSE	9	O14777	NDC80	class I	AML14_DCB
877		>sp|O14777|NDC80_HUMAN Kinetochore protein NDC80 homolog OS=Homo sapiens GN=NDC80 PE=1 SV=1	N.GLNEEIARV.E	FALSE	9	O14777	NDC80	class I	AML14_DCB
878		>sp|O14777|NDC80_HUMAN Kinetochore protein NDC80 homolog OS=Homo sapiens GN=NDC80 PE=1 SV=1	M.NELDAVQREY.Q	FALSE	10	O14777	NDC80	class I	AML14_DCB
879		>sp|O14777|NDC80_HUMAN Kinetochore protein NDC80 homolog OS=Homo sapiens GN=NDC80 PE=1 SV=1	K.HLEEQIAKV.D	FALSE	9	O14777	NDC80	class I	AML14_DCB
880		>sp|P16949|STMN1_HUMAN Stathmin OS=Homo sapiens GN=STMN1 PE=1 SV=3	K.SHEAEVLK.Q	FALSE	8	P16949	STMN1	class I	AML14_DCB
881		>sp|P16949|STMN1_HUMAN Stathmin OS=Homo sapiens GN=STMN1 PE=1 SV=3	K.SHEAEVLK.Q	FALSE	8	P16949	STMN1	class I	AML14_DCB
882		>sp|P16949|STMN1_HUMAN Stathmin OS=Homo sapiens GN=STMN1 PE=1 SV=3	S.HEAEVLKQL.A	FALSE	9	P16949	STMN1	class I	AML14_DCB
883		>sp|P16949|STMN1_HUMAN Stathmin OS=Homo sapiens GN=STMN1 PE=1 SV=3	S.HEAEVLKQL.A	FALSE	9	P16949	STMN1	class I	AML14_DCB
884		>sp|P16949|STMN1_HUMAN Stathmin OS=Homo sapiens GN=STMN1 PE=1 SV=3	S.HEAEVLKQL.A	FALSE	9	P16949	STMN1	class I	AML14_DCB
885		>sp|P16949|STMN1_HUMAN Stathmin OS=Homo sapiens GN=STMN1 PE=1 SV=3	K.AIEENNNFSK.M	FALSE	10	P16949	STMN1	class I	AML14_DCB
886		>sp|P16949|STMN1_HUMAN Stathmin OS=Homo sapiens GN=STMN1 PE=1 SV=3	I.EENNNFSKM.A	FALSE	9	P16949	STMN1	class I	AML14_DCB
887		>sp|P16949|STMN1_HUMAN Stathmin OS=Homo sapiens GN=STMN1 PE=1 SV=3	K.ESKDPADETEAD.-	FALSE	12	P16949	STMN1	class I	AML14_DCB
888		>sp|P55209|NP1L1_HUMAN Nucleosome assembly protein 1-like 1 OS=Homo sapiens GN=NAP1L1 PE=1 SV=1	A.ALQERLDGL.V	FALSE	9	P55209	NAP1L1	class I	AML14_DCB
889		>sp|P55209|NP1L1_HUMAN Nucleosome assembly protein 1-like 1 OS=Homo sapiens GN=NAP1L1 PE=1 SV=1	Y.EEVHDLERKY.A	FALSE	10	P55209	NAP1L1	class I	AML14_DCB
890		>sp|P55209|NP1L1_HUMAN Nucleosome assembly protein 1-like 1 OS=Homo sapiens GN=NAP1L1 PE=1 SV=1	Y.EEVHDLERKY.A	FALSE	10	P55209	NAP1L1	class I	AML14_DCB
891		>sp|P55209|NP1L1_HUMAN Nucleosome assembly protein 1-like 1 OS=Homo sapiens GN=NAP1L1 PE=1 SV=1	Y.EEVHDLERKY.A	FALSE	10	P55209	NAP1L1	class I	AML14_DCB
892		>sp|P55209|NP1L1_HUMAN Nucleosome assembly protein 1-like 1 OS=Homo sapiens GN=NAP1L1 PE=1 SV=1	Y.EEVHDLERKY.A	FALSE	10	P55209	NAP1L1	class I	AML14_DCB
893		>sp|P55209|NP1L1_HUMAN Nucleosome assembly protein 1-like 1 OS=Homo sapiens GN=NAP1L1 PE=1 SV=1	S.DAGQPMSFV.L	FALSE	9	P55209	NAP1L1	class I	AML14_DCB
894		>sp|P55209|NP1L1_HUMAN Nucleosome assembly protein 1-like 1 OS=Homo sapiens GN=NAP1L1 PE=1 SV=1	L.AADFEIGHF.L	FALSE	9	P55209	NAP1L1	class I	AML14_DCB
895		>sp|P55209|NP1L1_HUMAN Nucleosome assembly protein 1-like 1 OS=Homo sapiens GN=NAP1L1 PE=1 SV=1	L.AADFEIGHF.L	FALSE	9	P55209	NAP1L1	class I	AML14_DCB
896		>sp|Q9NYP9|MS18A_HUMAN Protein Mis18-alpha OS=Homo sapiens GN=MIS18A PE=1 SV=1	M.KLWEAESKL.S	FALSE	9	Q9NYP9	MIS18A	class I	AML14_DCB
897		>sp|Q9NYP9|MS18A_HUMAN Protein Mis18-alpha OS=Homo sapiens GN=MIS18A PE=1 SV=1	M.KLWEAESKL.S	FALSE	9	Q9NYP9	MIS18A	class I	AML14_DCB
898		>sp|Q9NYP9|MS18A_HUMAN Protein Mis18-alpha OS=Homo sapiens GN=MIS18A PE=1 SV=1	M.KLWEAESKL.S	FALSE	9	Q9NYP9	MIS18A	class I	AML14_DCB
899		>sp|Q9NYP9|MS18A_HUMAN Protein Mis18-alpha OS=Homo sapiens GN=MIS18A PE=1 SV=1	M.KLWEAESKL.S	FALSE	9	Q9NYP9	MIS18A	class I	AML14_DCB
900		>sp|Q9NYP9|MS18A_HUMAN Protein Mis18-alpha OS=Homo sapiens GN=MIS18A PE=1 SV=1	M.KLWEAESKLSF.A	FALSE	11	Q9NYP9	MIS18A	class I	AML14_DCB
901		>sp|Q9NYP9|MS18A_HUMAN Protein Mis18-alpha OS=Homo sapiens GN=MIS18A PE=1 SV=1	M.KLWEAESKLSF.A	FALSE	11	Q9NYP9	MIS18A	class I	AML14_DCB
902		>sp|Q9NYP9|MS18A_HUMAN Protein Mis18-alpha OS=Homo sapiens GN=MIS18A PE=1 SV=1	M.KLWEAESKLSF.A	FALSE	11	Q9NYP9	MIS18A	class I	AML14_DCB
903		>sp|P29350|PTN6_HUMAN Tyrosine-protein phosphatase non-receptor type 6 OS=Homo sapiens GN=PTPN6 PE=1 SV=1	W.TFLVRESL.S	FALSE	8	P29350	PTPN6	class I	AML14_DCB
904		>sp|P29350|PTN6_HUMAN Tyrosine-protein phosphatase non-receptor type 6 OS=Homo sapiens GN=PTPN6 PE=1 SV=1	R.QPYYATRV.N	FALSE	8	P29350	PTPN6	class I	AML14_DCB
905		>sp|P29350|PTN6_HUMAN Tyrosine-protein phosphatase non-receptor type 6 OS=Homo sapiens GN=PTPN6 PE=1 SV=1	E.SEDTAKAGF.W	FALSE	9	P29350	PTPN6	class I	AML14_DCB
906		>sp|P29350|PTN6_HUMAN Tyrosine-protein phosphatase non-receptor type 6 OS=Homo sapiens GN=PTPN6 PE=1 SV=1	I.LPFDHSRV.I	FALSE	8	P29350	PTPN6	class I	AML14_DCB
907		>sp|P29350|PTN6_HUMAN Tyrosine-protein phosphatase non-receptor type 6 OS=Homo sapiens GN=PTPN6 PE=1 SV=1	I.LPFDHSRVI.L	FALSE	9	P29350	PTPN6	class I	AML14_DCB
908		>sp|P29350|PTN6_HUMAN Tyrosine-protein phosphatase non-receptor type 6 OS=Homo sapiens GN=PTPN6 PE=1 SV=1	I.LPFDHSRVI.L	FALSE	9	P29350	PTPN6	class I	AML14_DCB
909		>sp|P29350|PTN6_HUMAN Tyrosine-protein phosphatase non-receptor type 6 OS=Homo sapiens GN=PTPN6 PE=1 SV=1	I.LPFDHSRVI.L	FALSE	9	P29350	PTPN6	class I	AML14_DCB
910		>sp|P29350|PTN6_HUMAN Tyrosine-protein phosphatase non-receptor type 6 OS=Homo sapiens GN=PTPN6 PE=1 SV=1	I.LPFDHSRVI.L	FALSE	9	P29350	PTPN6	class I	AML14_DCB
911		>sp|P29350|PTN6_HUMAN Tyrosine-protein phosphatase non-receptor type 6 OS=Homo sapiens GN=PTPN6 PE=1 SV=1	I.LPFDHSRVI.L	FALSE	9	P29350	PTPN6	class I	AML14_DCB
912		>sp|P29350|PTN6_HUMAN Tyrosine-protein phosphatase non-receptor type 6 OS=Homo sapiens GN=PTPN6 PE=1 SV=1	W.QENSRVIVM.T	FALSE	9	P29350	PTPN6	class I	AML14_DCB
913		>sp|Q9Y5B9|SP16H_HUMAN FACT complex subunit SPT16 OS=Homo sapiens GN=SUPT16H PE=1 SV=1	S.KLAESVEKA.I	FALSE	9	Q9Y5B9	SUPT16H	class I	AML14_DCB
914		>sp|Q9Y5B9|SP16H_HUMAN FACT complex subunit SPT16 OS=Homo sapiens GN=SUPT16H PE=1 SV=1	A.TPFHIATI.K	FALSE	8	Q9Y5B9	SUPT16H	class I	AML14_DCB
915		>sp|Q9Y5B9|SP16H_HUMAN FACT complex subunit SPT16 OS=Homo sapiens GN=SUPT16H PE=1 SV=1	I.FPNPEATFV.K	FALSE	9	Q9Y5B9	SUPT16H	class I	AML14_DCB
916		>sp|Q9Y5B9|SP16H_HUMAN FACT complex subunit SPT16 OS=Homo sapiens GN=SUPT16H PE=1 SV=1	K.NFIEKVEAL.T	FALSE	9	Q9Y5B9	SUPT16H	class I	AML14_DCB
917		>sp|Q9Y5B9|SP16H_HUMAN FACT complex subunit SPT16 OS=Homo sapiens GN=SUPT16H PE=1 SV=1	K.NFIEKVEAL.T	FALSE	9	Q9Y5B9	SUPT16H	class I	AML14_DCB
918		>sp|Q9Y5B9|SP16H_HUMAN FACT complex subunit SPT16 OS=Homo sapiens GN=SUPT16H PE=1 SV=1	K.NFIEKVEAL.T	FALSE	9	Q9Y5B9	SUPT16H	class I	AML14_DCB
919		>sp|Q9Y5B9|SP16H_HUMAN FACT complex subunit SPT16 OS=Homo sapiens GN=SUPT16H PE=1 SV=1	V.TMINAIPVA.S	FALSE	9	Q9Y5B9	SUPT16H	class I	AML14_DCB
920		>sp|Q9Y5B9|SP16H_HUMAN FACT complex subunit SPT16 OS=Homo sapiens GN=SUPT16H PE=1 SV=1	L.KYTEGVQSL.N	FALSE	9	Q9Y5B9	SUPT16H	class I	AML14_DCB
921		>sp|Q9Y5B9|SP16H_HUMAN FACT complex subunit SPT16 OS=Homo sapiens GN=SUPT16H PE=1 SV=1	L.KYTEGVQSL.N	FALSE	9	Q9Y5B9	SUPT16H	class I	AML14_DCB
922		>sp|Q7KZ85|SPT6H_HUMAN Transcription elongation factor SPT6 OS=Homo sapiens GN=SUPT6H PE=1 SV=2	R.NAFATPTI.S	FALSE	8	Q7KZ85	SUPT6H	class I	AML14_DCB
923		>sp|Q7KZ85|SPT6H_HUMAN Transcription elongation factor SPT6 OS=Homo sapiens GN=SUPT6H PE=1 SV=2	R.NAFATPTI.S	FALSE	8	Q7KZ85	SUPT6H	class I	AML14_DCB
924		>sp|Q7KZ85|SPT6H_HUMAN Transcription elongation factor SPT6 OS=Homo sapiens GN=SUPT6H PE=1 SV=2	W.RVWQWDEKW.T	FALSE	9	Q7KZ85	SUPT6H	class I	AML14_DCB
925		>sp|Q7KZ85|SPT6H_HUMAN Transcription elongation factor SPT6 OS=Homo sapiens GN=SUPT6H PE=1 SV=2	T.RLFEKMQAY.Q	FALSE	9	Q7KZ85	SUPT6H	class I	AML14_DCB
926		>sp|Q7KZ85|SPT6H_HUMAN Transcription elongation factor SPT6 OS=Homo sapiens GN=SUPT6H PE=1 SV=2	S.RVHPETYEW.A	FALSE	9	Q7KZ85	SUPT6H	class I	AML14_DCB
927		>sp|Q7KZ85|SPT6H_HUMAN Transcription elongation factor SPT6 OS=Homo sapiens GN=SUPT6H PE=1 SV=2	S.RVHPETYEW.A	FALSE	9	Q7KZ85	SUPT6H	class I	AML14_DCB
928		>sp|Q7KZ85|SPT6H_HUMAN Transcription elongation factor SPT6 OS=Homo sapiens GN=SUPT6H PE=1 SV=2	S.RVHPETYEW.A	FALSE	9	Q7KZ85	SUPT6H	class I	AML14_DCB
929		>sp|Q7KZ85|SPT6H_HUMAN Transcription elongation factor SPT6 OS=Homo sapiens GN=SUPT6H PE=1 SV=2	F.AEELERQGY.G	FALSE	9	Q7KZ85	SUPT6H	class I	AML14_DCB
930		>sp|Q7KZ85|SPT6H_HUMAN Transcription elongation factor SPT6 OS=Homo sapiens GN=SUPT6H PE=1 SV=2	I.TLYDIRAEL.S	FALSE	9	Q7KZ85	SUPT6H	class I	AML14_DCB
931		>sp|Q5T4S7|UBR4_HUMAN E3 ubiquitin-protein ligase UBR4 OS=Homo sapiens GN=UBR4 PE=1 SV=1	L.IPRNQLQSV.A	FALSE	9	Q5T4S7	UBR4	class I	AML14_DCB
932		>sp|Q5T4S7|UBR4_HUMAN E3 ubiquitin-protein ligase UBR4 OS=Homo sapiens GN=UBR4 PE=1 SV=1	L.DAAISKVQV.S	FALSE	9	Q5T4S7	UBR4	class I	AML14_DCB
933		>sp|Q5T4S7|UBR4_HUMAN E3 ubiquitin-protein ligase UBR4 OS=Homo sapiens GN=UBR4 PE=1 SV=1	S.YLADVTNAL.S	FALSE	9	Q5T4S7	UBR4	class I	AML14_DCB
934		>sp|Q5T4S7|UBR4_HUMAN E3 ubiquitin-protein ligase UBR4 OS=Homo sapiens GN=UBR4 PE=1 SV=1	F.IGASVDPAGV.T	FALSE	10	Q5T4S7	UBR4	class I	AML14_DCB
935		>sp|Q5T4S7|UBR4_HUMAN E3 ubiquitin-protein ligase UBR4 OS=Homo sapiens GN=UBR4 PE=1 SV=1	E.RLLQTLPQL.R	FALSE	9	Q5T4S7	UBR4	class I	AML14_DCB
936		>sp|Q5T4S7|UBR4_HUMAN E3 ubiquitin-protein ligase UBR4 OS=Homo sapiens GN=UBR4 PE=1 SV=1	E.RLLQTLPQL.R	FALSE	9	Q5T4S7	UBR4	class I	AML14_DCB
937		>sp|Q5T4S7|UBR4_HUMAN E3 ubiquitin-protein ligase UBR4 OS=Homo sapiens GN=UBR4 PE=1 SV=1	R.LPYQIKKI.T	FALSE	8	Q5T4S7	UBR4	class I	AML14_DCB
938		>sp|Q5T4S7|UBR4_HUMAN E3 ubiquitin-protein ligase UBR4 OS=Homo sapiens GN=UBR4 PE=1 SV=1	R.LPYQIKKI.T	FALSE	8	Q5T4S7	UBR4	class I	AML14_DCB
939		>sp|Q5T4S7|UBR4_HUMAN E3 ubiquitin-protein ligase UBR4 OS=Homo sapiens GN=UBR4 PE=1 SV=1	R.LPYQIKKI.T	FALSE	8	Q5T4S7	UBR4	class I	AML14_DCB
940		>sp|Q5T4S7|UBR4_HUMAN E3 ubiquitin-protein ligase UBR4 OS=Homo sapiens GN=UBR4 PE=1 SV=1	K.KLLEEQGIFL.R	FALSE	10	Q5T4S7	UBR4	class I	AML14_DCB
941		>sp|Q5T4S7|UBR4_HUMAN E3 ubiquitin-protein ligase UBR4 OS=Homo sapiens GN=UBR4 PE=1 SV=1	K.KLLEEQGIFL.R	FALSE	10	Q5T4S7	UBR4	class I	AML14_DCB
942		>sp|Q5T4S7|UBR4_HUMAN E3 ubiquitin-protein ligase UBR4 OS=Homo sapiens GN=UBR4 PE=1 SV=1	T.KLIDETQDMLL.E	FALSE	11	Q5T4S7	UBR4	class I	AML14_DCB
943		>sp|Q5T4S7|UBR4_HUMAN E3 ubiquitin-protein ligase UBR4 OS=Homo sapiens GN=UBR4 PE=1 SV=1	T.KLIDETQDMLL.E	FALSE	11	Q5T4S7	UBR4	class I	AML14_DCB
944	M[+16]	>sp|Q5T4S7|UBR4_HUMAN E3 ubiquitin-protein ligase UBR4 OS=Homo sapiens GN=UBR4 PE=1 SV=1	T.KLIDETQDM[+15.995]LL.E	FALSE	11	Q5T4S7	UBR4	class I	AML14_DCB
945	M[+16]	>sp|Q5T4S7|UBR4_HUMAN E3 ubiquitin-protein ligase UBR4 OS=Homo sapiens GN=UBR4 PE=1 SV=1	T.KLIDETQDM[+15.995]LL.E	FALSE	11	Q5T4S7	UBR4	class I	AML14_DCB
946		>sp|P31350|RIR2_HUMAN Ribonucleoside-diphosphate reductase subunit M2 OS=Homo sapiens GN=RRM2 PE=1 SV=1	R.IFQEPTEPK.T	FALSE	9	P31350	RRM2	class I	AML14_DCB
947		>sp|P31350|RIR2_HUMAN Ribonucleoside-diphosphate reductase subunit M2 OS=Homo sapiens GN=RRM2 PE=1 SV=1	R.IFQEPTEPK.T	FALSE	9	P31350	RRM2	class I	AML14_DCB
948		>sp|P31350|RIR2_HUMAN Ribonucleoside-diphosphate reductase subunit M2 OS=Homo sapiens GN=RRM2 PE=1 SV=1	R.YFISHVLAF.F	FALSE	9	P31350	RRM2	class I	AML14_DCB
949		>sp|P31350|RIR2_HUMAN Ribonucleoside-diphosphate reductase subunit M2 OS=Homo sapiens GN=RRM2 PE=1 SV=1	R.YFISHVLAF.F	FALSE	9	P31350	RRM2	class I	AML14_DCB
950		>sp|P31350|RIR2_HUMAN Ribonucleoside-diphosphate reductase subunit M2 OS=Homo sapiens GN=RRM2 PE=1 SV=1	A.TYGERVVAF.A	FALSE	9	P31350	RRM2	class I	AML14_DCB
951		>sp|P31350|RIR2_HUMAN Ribonucleoside-diphosphate reductase subunit M2 OS=Homo sapiens GN=RRM2 PE=1 SV=1	A.TYGERVVAF.A	FALSE	9	P31350	RRM2	class I	AML14_DCB
952		>sp|P31350|RIR2_HUMAN Ribonucleoside-diphosphate reductase subunit M2 OS=Homo sapiens GN=RRM2 PE=1 SV=1	A.TYGERVVAF.A	FALSE	9	P31350	RRM2	class I	AML14_DCB
953		>sp|P31350|RIR2_HUMAN Ribonucleoside-diphosphate reductase subunit M2 OS=Homo sapiens GN=RRM2 PE=1 SV=1	A.TYGERVVAF.A	FALSE	9	P31350	RRM2	class I	AML14_DCB
954		>sp|P31350|RIR2_HUMAN Ribonucleoside-diphosphate reductase subunit M2 OS=Homo sapiens GN=RRM2 PE=1 SV=1	T.EALPVKLI.G	FALSE	8	P31350	RRM2	class I	AML14_DCB
955		>sp|P31350|RIR2_HUMAN Ribonucleoside-diphosphate reductase subunit M2 OS=Homo sapiens GN=RRM2 PE=1 SV=1	T.EALPVKLI.G	FALSE	8	P31350	RRM2	class I	AML14_DCB
956		>sp|P31350|RIR2_HUMAN Ribonucleoside-diphosphate reductase subunit M2 OS=Homo sapiens GN=RRM2 PE=1 SV=1	T.EALPVKLI.G	FALSE	8	P31350	RRM2	class I	AML14_DCB
957		>sp|P31350|RIR2_HUMAN Ribonucleoside-diphosphate reductase subunit M2 OS=Homo sapiens GN=RRM2 PE=1 SV=1	S.KVFRVENPF.D	FALSE	9	P31350	RRM2	class I	AML14_DCB
958		>sp|P31350|RIR2_HUMAN Ribonucleoside-diphosphate reductase subunit M2 OS=Homo sapiens GN=RRM2 PE=1 SV=1	S.KVFRVENPF.D	FALSE	9	P31350	RRM2	class I	AML14_DCB
959		>sp|P31350|RIR2_HUMAN Ribonucleoside-diphosphate reductase subunit M2 OS=Homo sapiens GN=RRM2 PE=1 SV=1	S.KVFRVENPF.D	FALSE	9	P31350	RRM2	class I	AML14_DCB
960		>sp|P31350|RIR2_HUMAN Ribonucleoside-diphosphate reductase subunit M2 OS=Homo sapiens GN=RRM2 PE=1 SV=1	S.KVFRVENPF.D	FALSE	9	P31350	RRM2	class I	AML14_DCB
961		>sp|Q99941|ATF6B_HUMAN Cyclic AMP-dependent transcription factor ATF-6 beta OS=Homo sapiens GN=ATF6B PE=1 SV=2	S.TLYSGLDEV.A	FALSE	9	Q99941	ATF6B	class I	AML14_DCB
962		>sp|Q99941|ATF6B_HUMAN Cyclic AMP-dependent transcription factor ATF-6 beta OS=Homo sapiens GN=ATF6B PE=1 SV=2	S.TLYSGLDEV.A	FALSE	9	Q99941	ATF6B	class I	AML14_DCB
963		>sp|Q99941|ATF6B_HUMAN Cyclic AMP-dependent transcription factor ATF-6 beta OS=Homo sapiens GN=ATF6B PE=1 SV=2	L.LGDDPTSSF.E	FALSE	9	Q99941	ATF6B	class I	AML14_DCB
964		>sp|Q99941|ATF6B_HUMAN Cyclic AMP-dependent transcription factor ATF-6 beta OS=Homo sapiens GN=ATF6B PE=1 SV=2	E.YLQGLEARL.Q	FALSE	9	Q99941	ATF6B	class I	AML14_DCB
965		>sp|Q99941|ATF6B_HUMAN Cyclic AMP-dependent transcription factor ATF-6 beta OS=Homo sapiens GN=ATF6B PE=1 SV=2	E.ALLAENSEL.K	FALSE	9	Q99941	ATF6B	class I	AML14_DCB
966		>sp|Q99941|ATF6B_HUMAN Cyclic AMP-dependent transcription factor ATF-6 beta OS=Homo sapiens GN=ATF6B PE=1 SV=2	T.AFPGGAKEL.L	FALSE	9	Q99941	ATF6B	class I	AML14_DCB
967		>sp|Q99941|ATF6B_HUMAN Cyclic AMP-dependent transcription factor ATF-6 beta OS=Homo sapiens GN=ATF6B PE=1 SV=2	T.AFPGGAKEL.L	FALSE	9	Q99941	ATF6B	class I	AML14_DCB
968		>sp|Q99941|ATF6B_HUMAN Cyclic AMP-dependent transcription factor ATF-6 beta OS=Homo sapiens GN=ATF6B PE=1 SV=2	T.AFPGGAKEL.L	FALSE	9	Q99941	ATF6B	class I	AML14_DCB
969		>sp|Q99941|ATF6B_HUMAN Cyclic AMP-dependent transcription factor ATF-6 beta OS=Homo sapiens GN=ATF6B PE=1 SV=2	T.AFPGGAKEL.L	FALSE	9	Q99941	ATF6B	class I	AML14_DCB
970		>sp|Q99941|ATF6B_HUMAN Cyclic AMP-dependent transcription factor ATF-6 beta OS=Homo sapiens GN=ATF6B PE=1 SV=2	T.AFPGGAKEL.L	FALSE	9	Q99941	ATF6B	class I	AML14_DCB
971		>sp|Q99941|ATF6B_HUMAN Cyclic AMP-dependent transcription factor ATF-6 beta OS=Homo sapiens GN=ATF6B PE=1 SV=2	T.AFPGGAKEL.L	FALSE	9	Q99941	ATF6B	class I	AML14_DCB
972		>sp|Q99941|ATF6B_HUMAN Cyclic AMP-dependent transcription factor ATF-6 beta OS=Homo sapiens GN=ATF6B PE=1 SV=2	T.AFPGGAKEL.L	FALSE	9	Q99941	ATF6B	class I	AML14_DCB
973		>sp|P49327|FAS_HUMAN Fatty acid synthase OS=Homo sapiens GN=FASN PE=1 SV=3	H.SLAWDVPAA.E	FALSE	9	P49327	FASN	class I	AML14_DCB
974		>sp|P49327|FAS_HUMAN Fatty acid synthase OS=Homo sapiens GN=FASN PE=1 SV=3	H.SLAWDVPAA.E	FALSE	9	P49327	FASN	class I	AML14_DCB
975		>sp|P49327|FAS_HUMAN Fatty acid synthase OS=Homo sapiens GN=FASN PE=1 SV=3	S.TAYYALVV.R	FALSE	8	P49327	FASN	class I	AML14_DCB
976		>sp|P49327|FAS_HUMAN Fatty acid synthase OS=Homo sapiens GN=FASN PE=1 SV=3	S.TAYYALVV.R	FALSE	8	P49327	FASN	class I	AML14_DCB
977		>sp|P49327|FAS_HUMAN Fatty acid synthase OS=Homo sapiens GN=FASN PE=1 SV=3	S.TAYYALVV.R	FALSE	8	P49327	FASN	class I	AML14_DCB
978		>sp|P49327|FAS_HUMAN Fatty acid synthase OS=Homo sapiens GN=FASN PE=1 SV=3	S.KADEASEL.A	FALSE	8	P49327	FASN	class I	AML14_DCB
979		>sp|P49327|FAS_HUMAN Fatty acid synthase OS=Homo sapiens GN=FASN PE=1 SV=3	V.HPIEGSTTV.F	FALSE	9	P49327	FASN	class I	AML14_DCB
980		>sp|P49327|FAS_HUMAN Fatty acid synthase OS=Homo sapiens GN=FASN PE=1 SV=3	L.FLFDGSPTYV.L	FALSE	10	P49327	FASN	class I	AML14_DCB
981		>sp|P49327|FAS_HUMAN Fatty acid synthase OS=Homo sapiens GN=FASN PE=1 SV=3	C.DGKVSVHVI.E	FALSE	9	P49327	FASN	class I	AML14_DCB
982		>sp|P49327|FAS_HUMAN Fatty acid synthase OS=Homo sapiens GN=FASN PE=1 SV=3	C.DGKVSVHVI.E	FALSE	9	P49327	FASN	class I	AML14_DCB
983		>sp|P49327|FAS_HUMAN Fatty acid synthase OS=Homo sapiens GN=FASN PE=1 SV=3	C.DGKVSVHVI.E	FALSE	9	P49327	FASN	class I	AML14_DCB
984		>sp|P49327|FAS_HUMAN Fatty acid synthase OS=Homo sapiens GN=FASN PE=1 SV=3	C.DGKVSVHVI.E	FALSE	9	P49327	FASN	class I	AML14_DCB
985		>sp|O60610|DIAP1_HUMAN Protein diaphanous homolog 1 OS=Homo sapiens GN=DIAPH1 PE=1 SV=2	L.DGLKSGTTI.A	FALSE	9	O60610	DIAPH1	class I	AML14_DCB
986		>sp|O60610|DIAP1_HUMAN Protein diaphanous homolog 1 OS=Homo sapiens GN=DIAPH1 PE=1 SV=2	A.SLSAAAITV.P	FALSE	9	O60610	DIAPH1	class I	AML14_DCB
987		>sp|O60610|DIAP1_HUMAN Protein diaphanous homolog 1 OS=Homo sapiens GN=DIAPH1 PE=1 SV=2	R.MPYQEIKNV.I	FALSE	9	O60610	DIAPH1	class I	AML14_DCB
988	M[+16]	>sp|O60610|DIAP1_HUMAN Protein diaphanous homolog 1 OS=Homo sapiens GN=DIAPH1 PE=1 SV=2	R.M[+15.995]PYQEIKNV.I	FALSE	9	O60610	DIAPH1	class I	AML14_DCB
989		>sp|O60610|DIAP1_HUMAN Protein diaphanous homolog 1 OS=Homo sapiens GN=DIAPH1 PE=1 SV=2	C.EELRKSESF.S	FALSE	9	O60610	DIAPH1	class I	AML14_DCB
990		>sp|O60610|DIAP1_HUMAN Protein diaphanous homolog 1 OS=Homo sapiens GN=DIAPH1 PE=1 SV=2	C.EELRKSESF.S	FALSE	9	O60610	DIAPH1	class I	AML14_DCB
991		>sp|O60610|DIAP1_HUMAN Protein diaphanous homolog 1 OS=Homo sapiens GN=DIAPH1 PE=1 SV=2	Y.FLFDPKKLSV.E	FALSE	10	O60610	DIAPH1	class I	AML14_DCB
992		>sp|Q7Z392|TPC11_HUMAN Trafficking protein particle complex subunit 11 OS=Homo sapiens GN=TRAPPC11 PE=1 SV=2	N.AFYEHAQTY.Y	FALSE	9	Q7Z392	TRAPPC11	class I	AML14_DCB
993		>sp|Q7Z392|TPC11_HUMAN Trafficking protein particle complex subunit 11 OS=Homo sapiens GN=TRAPPC11 PE=1 SV=2	N.AFYEHAQTYY.Y	FALSE	10	Q7Z392	TRAPPC11	class I	AML14_DCB
994		>sp|Q7Z392|TPC11_HUMAN Trafficking protein particle complex subunit 11 OS=Homo sapiens GN=TRAPPC11 PE=1 SV=2	A.FYEHAQTYY.Y	FALSE	9	Q7Z392	TRAPPC11	class I	AML14_DCB
995		>sp|Q7Z392|TPC11_HUMAN Trafficking protein particle complex subunit 11 OS=Homo sapiens GN=TRAPPC11 PE=1 SV=2	A.FYEHAQTYY.Y	FALSE	9	Q7Z392	TRAPPC11	class I	AML14_DCB
996		>sp|Q7Z392|TPC11_HUMAN Trafficking protein particle complex subunit 11 OS=Homo sapiens GN=TRAPPC11 PE=1 SV=2	Q.KLWADRISL.A	FALSE	9	Q7Z392	TRAPPC11	class I	AML14_DCB
997		>sp|Q7Z392|TPC11_HUMAN Trafficking protein particle complex subunit 11 OS=Homo sapiens GN=TRAPPC11 PE=1 SV=2	Q.KLWADRISL.A	FALSE	9	Q7Z392	TRAPPC11	class I	AML14_DCB
998		>sp|Q7Z392|TPC11_HUMAN Trafficking protein particle complex subunit 11 OS=Homo sapiens GN=TRAPPC11 PE=1 SV=2	L.RFPNFTNQL.L	FALSE	9	Q7Z392	TRAPPC11	class I	AML14_DCB
999		>sp|Q7Z392|TPC11_HUMAN Trafficking protein particle complex subunit 11 OS=Homo sapiens GN=TRAPPC11 PE=1 SV=2	L.RFPNFTNQL.L	FALSE	9	Q7Z392	TRAPPC11	class I	AML14_DCB
1000		>sp|P14625|ENPL_HUMAN Endoplasmin OS=Homo sapiens GN=HSP90B1 PE=1 SV=1	S.DALDKIRLI.S	FALSE	9	P14625	HSP90B1	class I	AML14_DCB
1001		>sp|P14625|ENPL_HUMAN Endoplasmin OS=Homo sapiens GN=HSP90B1 PE=1 SV=1	S.DALDKIRLI.S	FALSE	9	P14625	HSP90B1	class I	AML14_DCB
1002		>sp|P14625|ENPL_HUMAN Endoplasmin OS=Homo sapiens GN=HSP90B1 PE=1 SV=1	S.DALDKIRLI.S	FALSE	9	P14625	HSP90B1	class I	AML14_DCB
1003		>sp|P14625|ENPL_HUMAN Endoplasmin OS=Homo sapiens GN=HSP90B1 PE=1 SV=1	S.DALDKIRLI.S	FALSE	9	P14625	HSP90B1	class I	AML14_DCB
1004		>sp|P14625|ENPL_HUMAN Endoplasmin OS=Homo sapiens GN=HSP90B1 PE=1 SV=1	S.DALDKIRLI.S	FALSE	9	P14625	HSP90B1	class I	AML14_DCB
1005		>sp|P14625|ENPL_HUMAN Endoplasmin OS=Homo sapiens GN=HSP90B1 PE=1 SV=1	K.ALKDKIEKA.V	FALSE	9	P14625	HSP90B1	class I	AML14_DCB
1006		>sp|P14625|ENPL_HUMAN Endoplasmin OS=Homo sapiens GN=HSP90B1 PE=1 SV=1	K.ALKDKIEKA.V	FALSE	9	P14625	HSP90B1	class I	AML14_DCB
1007		>sp|P14625|ENPL_HUMAN Endoplasmin OS=Homo sapiens GN=HSP90B1 PE=1 SV=1	K.ALKDKIEKA.V	FALSE	9	P14625	HSP90B1	class I	AML14_DCB
1008		>sp|P14625|ENPL_HUMAN Endoplasmin OS=Homo sapiens GN=HSP90B1 PE=1 SV=1	K.DISTNYYASQK.K	FALSE	11	P14625	HSP90B1	class I	AML14_DCB
1009		>sp|P06733|ENOA_HUMAN Alpha-enolase OS=Homo sapiens GN=ENO1 PE=1 SV=2	R.GNPTVEVDLFTSK.G	FALSE	13	P06733	ENO1	class I	AML14_DCB
1010		>sp|P06733|ENOA_HUMAN Alpha-enolase OS=Homo sapiens GN=ENO1 PE=1 SV=2	R.GNPTVEVDLFTSK.G	FALSE	13	P06733	ENO1	class I	AML14_DCB
1011		>sp|P06733|ENOA_HUMAN Alpha-enolase OS=Homo sapiens GN=ENO1 PE=1 SV=2	R.GNPTVEVDLFTSK.G	FALSE	13	P06733	ENO1	class I	AML14_DCB
1012		>sp|P06733|ENOA_HUMAN Alpha-enolase OS=Homo sapiens GN=ENO1 PE=1 SV=2	K.TIAPALVSK.K	FALSE	9	P06733	ENO1	class I	AML14_DCB
1013		>sp|P06733|ENOA_HUMAN Alpha-enolase OS=Homo sapiens GN=ENO1 PE=1 SV=2	K.KLNVTEQEK.I	FALSE	9	P06733	ENO1	class I	AML14_DCB
1014		>sp|P06733|ENOA_HUMAN Alpha-enolase OS=Homo sapiens GN=ENO1 PE=1 SV=2	R.YISPDQLADLYK.S	FALSE	12	P06733	ENO1	class I	AML14_DCB
1015		>sp|Q15021|CND1_HUMAN Condensin complex subunit 1 OS=Homo sapiens GN=NCAPD2 PE=1 SV=3	T.ELAERVPAI.L	FALSE	9	Q15021	NCAPD2	class I	AML14_DCB
1016		>sp|Q15021|CND1_HUMAN Condensin complex subunit 1 OS=Homo sapiens GN=NCAPD2 PE=1 SV=3	A.AMAEMVLQV.L	FALSE	9	Q15021	NCAPD2	class I	AML14_DCB
1017		>sp|Q15021|CND1_HUMAN Condensin complex subunit 1 OS=Homo sapiens GN=NCAPD2 PE=1 SV=3	A.AMAEMVLQV.L	FALSE	9	Q15021	NCAPD2	class I	AML14_DCB
1018		>sp|Q15021|CND1_HUMAN Condensin complex subunit 1 OS=Homo sapiens GN=NCAPD2 PE=1 SV=3	G.RLADKSVLV.C	FALSE	9	Q15021	NCAPD2	class I	AML14_DCB
1019		>sp|Q15021|CND1_HUMAN Condensin complex subunit 1 OS=Homo sapiens GN=NCAPD2 PE=1 SV=3	G.RLADKSVLV.C	FALSE	9	Q15021	NCAPD2	class I	AML14_DCB
1020		>sp|Q15021|CND1_HUMAN Condensin complex subunit 1 OS=Homo sapiens GN=NCAPD2 PE=1 SV=3	Q.DAYSFSRKI.T	FALSE	9	Q15021	NCAPD2	class I	AML14_DCB
1021		>sp|Q15021|CND1_HUMAN Condensin complex subunit 1 OS=Homo sapiens GN=NCAPD2 PE=1 SV=3	Q.DAYSFSRKI.T	FALSE	9	Q15021	NCAPD2	class I	AML14_DCB
1022		>sp|Q15021|CND1_HUMAN Condensin complex subunit 1 OS=Homo sapiens GN=NCAPD2 PE=1 SV=3	Q.DAYSFSRKI.T	FALSE	9	Q15021	NCAPD2	class I	AML14_DCB
1023		>sp|Q15021|CND1_HUMAN Condensin complex subunit 1 OS=Homo sapiens GN=NCAPD2 PE=1 SV=3	Q.DAYSFSRKI.T	FALSE	9	Q15021	NCAPD2	class I	AML14_DCB
1024		>sp|Q15021|CND1_HUMAN Condensin complex subunit 1 OS=Homo sapiens GN=NCAPD2 PE=1 SV=3	Q.DAYSFSRKI.T	FALSE	9	Q15021	NCAPD2	class I	AML14_DCB
1025		>sp|Q15021|CND1_HUMAN Condensin complex subunit 1 OS=Homo sapiens GN=NCAPD2 PE=1 SV=3	Q.DAYSFSRKI.T	FALSE	9	Q15021	NCAPD2	class I	AML14_DCB
1026		>sp|Q15021|CND1_HUMAN Condensin complex subunit 1 OS=Homo sapiens GN=NCAPD2 PE=1 SV=3	A.VLNAYRQLY.L	FALSE	9	Q15021	NCAPD2	class I	AML14_DCB
1027		>sp|Q15021|CND1_HUMAN Condensin complex subunit 1 OS=Homo sapiens GN=NCAPD2 PE=1 SV=3	A.VLNAYRQLY.L	FALSE	9	Q15021	NCAPD2	class I	AML14_DCB
1028		>sp|Q15021|CND1_HUMAN Condensin complex subunit 1 OS=Homo sapiens GN=NCAPD2 PE=1 SV=3	L.SLAGDVALQQL.V	FALSE	11	Q15021	NCAPD2	class I	AML14_DCB
1029		>sp|P53621|COPA_HUMAN Coatomer subunit alpha OS=Homo sapiens GN=COPA PE=1 SV=2	Y.KIKVWNYKL.R	FALSE	9	P53621	COPA	class I	AML14_DCB
1030		>sp|P53621|COPA_HUMAN Coatomer subunit alpha OS=Homo sapiens GN=COPA PE=1 SV=2	N.SEDKSIRVW.D	FALSE	9	P53621	COPA	class I	AML14_DCB
1031		>sp|P53621|COPA_HUMAN Coatomer subunit alpha OS=Homo sapiens GN=COPA PE=1 SV=2	N.SEDKSIRVW.D	FALSE	9	P53621	COPA	class I	AML14_DCB
1032		>sp|P53621|COPA_HUMAN Coatomer subunit alpha OS=Homo sapiens GN=COPA PE=1 SV=2	G.HYQNALYL.G	FALSE	8	P53621	COPA	class I	AML14_DCB
1033		>sp|P53621|COPA_HUMAN Coatomer subunit alpha OS=Homo sapiens GN=COPA PE=1 SV=2	G.HYQNALYL.G	FALSE	8	P53621	COPA	class I	AML14_DCB
1034		>sp|P53621|COPA_HUMAN Coatomer subunit alpha OS=Homo sapiens GN=COPA PE=1 SV=2	A.GLKNGVPAV.G	FALSE	9	P53621	COPA	class I	AML14_DCB
1035		>sp|P53621|COPA_HUMAN Coatomer subunit alpha OS=Homo sapiens GN=COPA PE=1 SV=2	A.GLKNGVPAV.G	FALSE	9	P53621	COPA	class I	AML14_DCB
1036		>sp|P53621|COPA_HUMAN Coatomer subunit alpha OS=Homo sapiens GN=COPA PE=1 SV=2	A.GLKNGVPAV.G	FALSE	9	P53621	COPA	class I	AML14_DCB
1037		>sp|P53621|COPA_HUMAN Coatomer subunit alpha OS=Homo sapiens GN=COPA PE=1 SV=2	L.KLNDLIQRL.Q	FALSE	9	P53621	COPA	class I	AML14_DCB
1038		>sp|P53621|COPA_HUMAN Coatomer subunit alpha OS=Homo sapiens GN=COPA PE=1 SV=2	L.KLNDLIQRL.Q	FALSE	9	P53621	COPA	class I	AML14_DCB
1039		>sp|P53621|COPA_HUMAN Coatomer subunit alpha OS=Homo sapiens GN=COPA PE=1 SV=2	A.AYFTHSNL.Q	FALSE	8	P53621	COPA	class I	AML14_DCB
1040		>sp|P53621|COPA_HUMAN Coatomer subunit alpha OS=Homo sapiens GN=COPA PE=1 SV=2	A.AYFTHSNL.Q	FALSE	8	P53621	COPA	class I	AML14_DCB
1041		>sp|P30153|2AAA_HUMAN Serine/threonine-protein phosphatase 2A 65 kDa regulatory subunit A alpha isoform OS=Homo sapiens GN=PPP2R1A PE=1 SV=4	S.KLGEFAKVLEL.D	FALSE	11	P30153	PPP2R1A	class I	AML14_DCB
1042		>sp|P30153|2AAA_HUMAN Serine/threonine-protein phosphatase 2A 65 kDa regulatory subunit A alpha isoform OS=Homo sapiens GN=PPP2R1A PE=1 SV=4	S.KLGEFAKVLEL.D	FALSE	11	P30153	PPP2R1A	class I	AML14_DCB
1043		>sp|P30153|2AAA_HUMAN Serine/threonine-protein phosphatase 2A 65 kDa regulatory subunit A alpha isoform OS=Homo sapiens GN=PPP2R1A PE=1 SV=4	L.EALVMPTL.R	FALSE	8	P30153	PPP2R1A	class I	AML14_DCB
1044		>sp|P30153|2AAA_HUMAN Serine/threonine-protein phosphatase 2A 65 kDa regulatory subunit A alpha isoform OS=Homo sapiens GN=PPP2R1A PE=1 SV=4	A.WLVDHVYAI.R	FALSE	9	P30153	PPP2R1A	class I	AML14_DCB
1045		>sp|P30153|2AAA_HUMAN Serine/threonine-protein phosphatase 2A 65 kDa regulatory subunit A alpha isoform OS=Homo sapiens GN=PPP2R1A PE=1 SV=4	A.HATIIPKV.L	FALSE	8	P30153	PPP2R1A	class I	AML14_DCB
1046		>sp|P30153|2AAA_HUMAN Serine/threonine-protein phosphatase 2A 65 kDa regulatory subunit A alpha isoform OS=Homo sapiens GN=PPP2R1A PE=1 SV=4	A.HATIIPKV.L	FALSE	8	P30153	PPP2R1A	class I	AML14_DCB
1047		>sp|P30153|2AAA_HUMAN Serine/threonine-protein phosphatase 2A 65 kDa regulatory subunit A alpha isoform OS=Homo sapiens GN=PPP2R1A PE=1 SV=4	A.HATIIPKV.L	FALSE	8	P30153	PPP2R1A	class I	AML14_DCB
1048		>sp|P30153|2AAA_HUMAN Serine/threonine-protein phosphatase 2A 65 kDa regulatory subunit A alpha isoform OS=Homo sapiens GN=PPP2R1A PE=1 SV=4	K.LTQDQDVDVK.Y	FALSE	10	P30153	PPP2R1A	class I	AML14_DCB
1049		>sp|Q9BZE1|RM37_HUMAN 39S ribosomal protein L37, mitochondrial OS=Homo sapiens GN=MRPL37 PE=1 SV=2	C.RLLEGVKQA.L	FALSE	9	Q9BZE1	MRPL37	class I	AML14_DCB
1050		>sp|Q9BZE1|RM37_HUMAN 39S ribosomal protein L37, mitochondrial OS=Homo sapiens GN=MRPL37 PE=1 SV=2	C.RLLEGVKQA.L	FALSE	9	Q9BZE1	MRPL37	class I	AML14_DCB
1051		>sp|Q9BZE1|RM37_HUMAN 39S ribosomal protein L37, mitochondrial OS=Homo sapiens GN=MRPL37 PE=1 SV=2	T.EEIPKRETY.C	FALSE	9	Q9BZE1	MRPL37	class I	AML14_DCB
1052		>sp|Q9BZE1|RM37_HUMAN 39S ribosomal protein L37, mitochondrial OS=Homo sapiens GN=MRPL37 PE=1 SV=2	T.EEIPKRETY.C	FALSE	9	Q9BZE1	MRPL37	class I	AML14_DCB
1053		>sp|Q9BZE1|RM37_HUMAN 39S ribosomal protein L37, mitochondrial OS=Homo sapiens GN=MRPL37 PE=1 SV=2	T.EEIPKRETY.C	FALSE	9	Q9BZE1	MRPL37	class I	AML14_DCB
1054		>sp|Q9BZE1|RM37_HUMAN 39S ribosomal protein L37, mitochondrial OS=Homo sapiens GN=MRPL37 PE=1 SV=2	G.YPYPYPHTL.Y	FALSE	9	Q9BZE1	MRPL37	class I	AML14_DCB
1055		>sp|Q9BZE1|RM37_HUMAN 39S ribosomal protein L37, mitochondrial OS=Homo sapiens GN=MRPL37 PE=1 SV=2	G.YPYPYPHTL.Y	FALSE	9	Q9BZE1	MRPL37	class I	AML14_DCB
1056		>sp|Q9BZE1|RM37_HUMAN 39S ribosomal protein L37, mitochondrial OS=Homo sapiens GN=MRPL37 PE=1 SV=2	G.YPYPYPHTL.Y	FALSE	9	Q9BZE1	MRPL37	class I	AML14_DCB
1057		>sp|Q9BZE1|RM37_HUMAN 39S ribosomal protein L37, mitochondrial OS=Homo sapiens GN=MRPL37 PE=1 SV=2	G.YPYPYPHTLYL.L	FALSE	11	Q9BZE1	MRPL37	class I	AML14_DCB
1058		>sp|Q9BZE1|RM37_HUMAN 39S ribosomal protein L37, mitochondrial OS=Homo sapiens GN=MRPL37 PE=1 SV=2	G.YPYPYPHTLYL.L	FALSE	11	Q9BZE1	MRPL37	class I	AML14_DCB
1059		>sp|Q9BZE1|RM37_HUMAN 39S ribosomal protein L37, mitochondrial OS=Homo sapiens GN=MRPL37 PE=1 SV=2	P.YPYPHTLYL.L	FALSE	9	Q9BZE1	MRPL37	class I	AML14_DCB
1060		>sp|P14618|KPYM_HUMAN Pyruvate kinase PKM OS=Homo sapiens GN=PKM PE=1 SV=4	R.LDIDSPPITAR.N	FALSE	11	P14618	PKM	class I	AML14_DCB
1061		>sp|P14618|KPYM_HUMAN Pyruvate kinase PKM OS=Homo sapiens GN=PKM PE=1 SV=4	L.NFSHGTHEY.H	FALSE	9	P14618	PKM	class I	AML14_DCB
1062		>sp|P14618|KPYM_HUMAN Pyruvate kinase PKM OS=Homo sapiens GN=PKM PE=1 SV=4	K.GSGTAEVELK.K	FALSE	10	P14618	PKM	class I	AML14_DCB
1063		>sp|P14618|KPYM_HUMAN Pyruvate kinase PKM OS=Homo sapiens GN=PKM PE=1 SV=4	K.GSGTAEVELKK.G	FALSE	11	P14618	PKM	class I	AML14_DCB
1064		>sp|P14618|KPYM_HUMAN Pyruvate kinase PKM OS=Homo sapiens GN=PKM PE=1 SV=4	K.IENHEGVR.R	FALSE	8	P14618	PKM	class I	AML14_DCB
1065		>sp|P04439|1A03_HUMAN HLA class I histocompatibility antigen, A-3 alpha chain OS=Homo sapiens GN=HLA-A PE=1 SV=2	A.VMAPRTLLL.L	FALSE	9	P04439	HLA-A	class I	AML14_DCB
1066	M[+16]	>sp|P04439|1A03_HUMAN HLA class I histocompatibility antigen, A-3 alpha chain OS=Homo sapiens GN=HLA-A PE=1 SV=2	A.VM[+15.995]APRTLLL.L	FALSE	9	P04439	HLA-A	class I	AML14_DCB
1067	M[+16]	>sp|P04439|1A03_HUMAN HLA class I histocompatibility antigen, A-3 alpha chain OS=Homo sapiens GN=HLA-A PE=1 SV=2	A.VM[+15.995]APRTLLL.L	FALSE	9	P04439	HLA-A	class I	AML14_DCB
1068		>sp|P04439|1A03_HUMAN HLA class I histocompatibility antigen, A-3 alpha chain OS=Homo sapiens GN=HLA-A PE=1 SV=2	V.MAPRTLLL.L	FALSE	8	P04439	HLA-A	class I	AML14_DCB
1069		>sp|P04439|1A03_HUMAN HLA class I histocompatibility antigen, A-3 alpha chain OS=Homo sapiens GN=HLA-A PE=1 SV=2	V.MAPRTLLL.L	FALSE	8	P04439	HLA-A	class I	AML14_DCB
1070		>sp|P04439|1A03_HUMAN HLA class I histocompatibility antigen, A-3 alpha chain OS=Homo sapiens GN=HLA-A PE=1 SV=2	V.MAPRTLLL.L	FALSE	8	P04439	HLA-A	class I	AML14_DCB
1071		>sp|P04439|1A03_HUMAN HLA class I histocompatibility antigen, A-3 alpha chain OS=Homo sapiens GN=HLA-A PE=1 SV=2	V.MAPRTLLL.L	FALSE	8	P04439	HLA-A	class I	AML14_DCB
1072		>sp|P04439|1A03_HUMAN HLA class I histocompatibility antigen, A-3 alpha chain OS=Homo sapiens GN=HLA-A PE=1 SV=2	V.MAPRTLLL.L	FALSE	8	P04439	HLA-A	class I	AML14_DCB
1073	M[+16]	>sp|P04439|1A03_HUMAN HLA class I histocompatibility antigen, A-3 alpha chain OS=Homo sapiens GN=HLA-A PE=1 SV=2	V.M[+15.995]APRTLLL.L	FALSE	8	P04439	HLA-A	class I	AML14_DCB
1074	M[+16]	>sp|P04439|1A03_HUMAN HLA class I histocompatibility antigen, A-3 alpha chain OS=Homo sapiens GN=HLA-A PE=1 SV=2	V.M[+15.995]APRTLLL.L	FALSE	8	P04439	HLA-A	class I	AML14_DCB
1075		>sp|P04439|1A03_HUMAN HLA class I histocompatibility antigen, A-3 alpha chain OS=Homo sapiens GN=HLA-A PE=1 SV=2	Q.DAYDGKDYI.A	FALSE	9	P04439	HLA-A	class I	AML14_DCB
1076		>sp|P04439|1A03_HUMAN HLA class I histocompatibility antigen, A-3 alpha chain OS=Homo sapiens GN=HLA-A PE=1 SV=2	Q.DAYDGKDYI.A	FALSE	9	P04439	HLA-A	class I	AML14_DCB
1077		>sp|P04439|1A03_HUMAN HLA class I histocompatibility antigen, A-3 alpha chain OS=Homo sapiens GN=HLA-A PE=1 SV=2	Q.DAYDGKDYI.A	FALSE	9	P04439	HLA-A	class I	AML14_DCB
1078		>sp|P04439|1A03_HUMAN HLA class I histocompatibility antigen, A-3 alpha chain OS=Homo sapiens GN=HLA-A PE=1 SV=2	Q.DAYDGKDYI.A	FALSE	9	P04439	HLA-A	class I	AML14_DCB
1079		>sp|P04439|1A03_HUMAN HLA class I histocompatibility antigen, A-3 alpha chain OS=Homo sapiens GN=HLA-A PE=1 SV=2	Q.DAYDGKDYI.A	FALSE	9	P04439	HLA-A	class I	AML14_DCB
1080		>sp|P05164|PERM_HUMAN Myeloperoxidase OS=Homo sapiens GN=MPO PE=1 SV=1	M.EEAKQLVDKAY.K	FALSE	11	P05164	MPO	class I	AML14_DCB
1081		>sp|P05164|PERM_HUMAN Myeloperoxidase OS=Homo sapiens GN=MPO PE=1 SV=1	T.SFVDASMVY.G	FALSE	9	P05164	MPO	class I	AML14_DCB
1082		>sp|P05164|PERM_HUMAN Myeloperoxidase OS=Homo sapiens GN=MPO PE=1 SV=1	T.SFVDASMVY.G	FALSE	9	P05164	MPO	class I	AML14_DCB
1083		>sp|P05164|PERM_HUMAN Myeloperoxidase OS=Homo sapiens GN=MPO PE=1 SV=1	T.SFVDASMVY.G	FALSE	9	P05164	MPO	class I	AML14_DCB
1084		>sp|P05164|PERM_HUMAN Myeloperoxidase OS=Homo sapiens GN=MPO PE=1 SV=1	T.SFVDASMVY.G	FALSE	9	P05164	MPO	class I	AML14_DCB
1085	M[+16]	>sp|P05164|PERM_HUMAN Myeloperoxidase OS=Homo sapiens GN=MPO PE=1 SV=1	T.SFVDASM[+15.995]VY.G	FALSE	9	P05164	MPO	class I	AML14_DCB
1086	M[+16]	>sp|P05164|PERM_HUMAN Myeloperoxidase OS=Homo sapiens GN=MPO PE=1 SV=1	T.SFVDASM[+15.995]VY.G	FALSE	9	P05164	MPO	class I	AML14_DCB
1087	M[+16]	>sp|P05164|PERM_HUMAN Myeloperoxidase OS=Homo sapiens GN=MPO PE=1 SV=1	T.SFVDASM[+15.995]VY.G	FALSE	9	P05164	MPO	class I	AML14_DCB
1088	M[+16]	>sp|P05164|PERM_HUMAN Myeloperoxidase OS=Homo sapiens GN=MPO PE=1 SV=1	T.SFVDASM[+15.995]VY.G	FALSE	9	P05164	MPO	class I	AML14_DCB
1089		>sp|P05164|PERM_HUMAN Myeloperoxidase OS=Homo sapiens GN=MPO PE=1 SV=1	E.RLFEQVMRI.G	FALSE	9	P05164	MPO	class I	AML14_DCB
1090		>sp|P05164|PERM_HUMAN Myeloperoxidase OS=Homo sapiens GN=MPO PE=1 SV=1	R.KLRDGDRFWW.E	FALSE	10	P05164	MPO	class I	AML14_DCB
1091		>sp|P51532|SMCA4_HUMAN Transcription activator BRG1 OS=Homo sapiens GN=SMARCA4 PE=1 SV=2	E.ILQEREYRL.Q	FALSE	9	P51532	SMARCA4	class I	AML14_DCB
1092		>sp|P51532|SMCA4_HUMAN Transcription activator BRG1 OS=Homo sapiens GN=SMARCA4 PE=1 SV=2	E.ILQEREYRL.Q	FALSE	9	P51532	SMARCA4	class I	AML14_DCB
1093		>sp|P51532|SMCA4_HUMAN Transcription activator BRG1 OS=Homo sapiens GN=SMARCA4 PE=1 SV=2	E.ILQEREYRL.Q	FALSE	9	P51532	SMARCA4	class I	AML14_DCB
1094		>sp|P51532|SMCA4_HUMAN Transcription activator BRG1 OS=Homo sapiens GN=SMARCA4 PE=1 SV=2	E.ILQEREYRL.Q	FALSE	9	P51532	SMARCA4	class I	AML14_DCB
1095		>sp|P51532|SMCA4_HUMAN Transcription activator BRG1 OS=Homo sapiens GN=SMARCA4 PE=1 SV=2	T.DAPKAGQL.E	FALSE	8	P51532	SMARCA4	class I	AML14_DCB
1096		>sp|P51532|SMCA4_HUMAN Transcription activator BRG1 OS=Homo sapiens GN=SMARCA4 PE=1 SV=2	T.DAPKAGQLEAW.L	FALSE	11	P51532	SMARCA4	class I	AML14_DCB
1097		>sp|P51532|SMCA4_HUMAN Transcription activator BRG1 OS=Homo sapiens GN=SMARCA4 PE=1 SV=2	L.KQYQIKGLEW.L	FALSE	10	P51532	SMARCA4	class I	AML14_DCB
1098		>sp|P51532|SMCA4_HUMAN Transcription activator BRG1 OS=Homo sapiens GN=SMARCA4 PE=1 SV=2	L.KQYQIKGLEW.L	FALSE	10	P51532	SMARCA4	class I	AML14_DCB
1099		>sp|P51532|SMCA4_HUMAN Transcription activator BRG1 OS=Homo sapiens GN=SMARCA4 PE=1 SV=2	L.KQYQIKGLEW.L	FALSE	10	P51532	SMARCA4	class I	AML14_DCB
1100		>sp|P51532|SMCA4_HUMAN Transcription activator BRG1 OS=Homo sapiens GN=SMARCA4 PE=1 SV=2	H.ILAKIRWKY.M	FALSE	9	P51532	SMARCA4	class I	AML14_DCB
1101		>sp|P51532|SMCA4_HUMAN Transcription activator BRG1 OS=Homo sapiens GN=SMARCA4 PE=1 SV=2	N.HPYMFQHI.E	FALSE	8	P51532	SMARCA4	class I	AML14_DCB
1102	M[+16]	>sp|P51532|SMCA4_HUMAN Transcription activator BRG1 OS=Homo sapiens GN=SMARCA4 PE=1 SV=2	N.HPYM[+15.995]FQHI.E	FALSE	8	P51532	SMARCA4	class I	AML14_DCB
1103		>sp|Q15459|SF3A1_HUMAN Splicing factor 3A subunit 1 OS=Homo sapiens GN=SF3A1 PE=1 SV=1	I.YPPPEVRNI.V	FALSE	9	Q15459	SF3A1	class I	AML14_DCB
1104		>sp|Q15459|SF3A1_HUMAN Splicing factor 3A subunit 1 OS=Homo sapiens GN=SF3A1 PE=1 SV=1	I.YPPPEVRNI.V	FALSE	9	Q15459	SF3A1	class I	AML14_DCB
1105		>sp|Q15459|SF3A1_HUMAN Splicing factor 3A subunit 1 OS=Homo sapiens GN=SF3A1 PE=1 SV=1	N.IVDKTASFV.A	FALSE	9	Q15459	SF3A1	class I	AML14_DCB
1106		>sp|Q15459|SF3A1_HUMAN Splicing factor 3A subunit 1 OS=Homo sapiens GN=SF3A1 PE=1 SV=1	N.IVDKTASFV.A	FALSE	9	Q15459	SF3A1	class I	AML14_DCB
1107		>sp|Q15459|SF3A1_HUMAN Splicing factor 3A subunit 1 OS=Homo sapiens GN=SF3A1 PE=1 SV=1	Q.LPQKVQAQV.I	FALSE	9	Q15459	SF3A1	class I	AML14_DCB
1108		>sp|Q15459|SF3A1_HUMAN Splicing factor 3A subunit 1 OS=Homo sapiens GN=SF3A1 PE=1 SV=1	E.KAEEPPSQL.D	FALSE	9	Q15459	SF3A1	class I	AML14_DCB
1109		>sp|Q15459|SF3A1_HUMAN Splicing factor 3A subunit 1 OS=Homo sapiens GN=SF3A1 PE=1 SV=1	I.HAPRINVV.P	FALSE	8	Q15459	SF3A1	class I	AML14_DCB
1110		>sp|Q15459|SF3A1_HUMAN Splicing factor 3A subunit 1 OS=Homo sapiens GN=SF3A1 PE=1 SV=1	G.IFIKDSNSL.A	FALSE	9	Q15459	SF3A1	class I	AML14_DCB
1111		>sp|Q15459|SF3A1_HUMAN Splicing factor 3A subunit 1 OS=Homo sapiens GN=SF3A1 PE=1 SV=1	G.IFIKDSNSL.A	FALSE	9	Q15459	SF3A1	class I	AML14_DCB
1112		>sp|P25098|ARBK1_HUMAN Beta-adrenergic receptor kinase 1 OS=Homo sapiens GN=GRK2 PE=1 SV=2	L.LPEPSIRSV.M	FALSE	9	P25098	GRK2	class I	AML14_DCB
1113		>sp|P25098|ARBK1_HUMAN Beta-adrenergic receptor kinase 1 OS=Homo sapiens GN=GRK2 PE=1 SV=2	L.LPEPSIRSV.M	FALSE	9	P25098	GRK2	class I	AML14_DCB
1114		>sp|P25098|ARBK1_HUMAN Beta-adrenergic receptor kinase 1 OS=Homo sapiens GN=GRK2 PE=1 SV=2	E.KIFSQKLGY.L	FALSE	9	P25098	GRK2	class I	AML14_DCB
1115		>sp|P25098|ARBK1_HUMAN Beta-adrenergic receptor kinase 1 OS=Homo sapiens GN=GRK2 PE=1 SV=2	I.LLDEHGHVRI.S	FALSE	10	P25098	GRK2	class I	AML14_DCB
1116		>sp|P25098|ARBK1_HUMAN Beta-adrenergic receptor kinase 1 OS=Homo sapiens GN=GRK2 PE=1 SV=2	I.LLDEHGHVRI.S	FALSE	10	P25098	GRK2	class I	AML14_DCB
1117		>sp|P25098|ARBK1_HUMAN Beta-adrenergic receptor kinase 1 OS=Homo sapiens GN=GRK2 PE=1 SV=2	I.LLDEHGHVRI.S	FALSE	10	P25098	GRK2	class I	AML14_DCB
1118		>sp|P25098|ARBK1_HUMAN Beta-adrenergic receptor kinase 1 OS=Homo sapiens GN=GRK2 PE=1 SV=2	F.YLFPNRLEW.R	FALSE	9	P25098	GRK2	class I	AML14_DCB
1119		>sp|P25098|ARBK1_HUMAN Beta-adrenergic receptor kinase 1 OS=Homo sapiens GN=GRK2 PE=1 SV=2	R.DAYREAQQL.V	FALSE	9	P25098	GRK2	class I	AML14_DCB
1120		>sp|P25098|ARBK1_HUMAN Beta-adrenergic receptor kinase 1 OS=Homo sapiens GN=GRK2 PE=1 SV=2	R.DAYREAQQL.V	FALSE	9	P25098	GRK2	class I	AML14_DCB
1121		>sp|P08243|ASNS_HUMAN Asparagine synthetase [glutamine-hydrolyzing] OS=Homo sapiens GN=ASNS PE=1 SV=4	P.DAFRFENV.N	FALSE	8	P08243	ASNS	class I	AML14_DCB
1122		>sp|P08243|ASNS_HUMAN Asparagine synthetase [glutamine-hydrolyzing] OS=Homo sapiens GN=ASNS PE=1 SV=4	K.KVFLGRDTY.G	FALSE	9	P08243	ASNS	class I	AML14_DCB
1123		>sp|P08243|ASNS_HUMAN Asparagine synthetase [glutamine-hydrolyzing] OS=Homo sapiens GN=ASNS PE=1 SV=4	K.KVFLGRDTY.G	FALSE	9	P08243	ASNS	class I	AML14_DCB
1124		>sp|P08243|ASNS_HUMAN Asparagine synthetase [glutamine-hydrolyzing] OS=Homo sapiens GN=ASNS PE=1 SV=4	H.ALYDNVEKL.F	FALSE	9	P08243	ASNS	class I	AML14_DCB
1125		>sp|P08243|ASNS_HUMAN Asparagine synthetase [glutamine-hydrolyzing] OS=Homo sapiens GN=ASNS PE=1 SV=4	H.ALYDNVEKL.F	FALSE	9	P08243	ASNS	class I	AML14_DCB
1126		>sp|P08243|ASNS_HUMAN Asparagine synthetase [glutamine-hydrolyzing] OS=Homo sapiens GN=ASNS PE=1 SV=4	H.ALYDNVEKL.F	FALSE	9	P08243	ASNS	class I	AML14_DCB
1127		>sp|P08243|ASNS_HUMAN Asparagine synthetase [glutamine-hydrolyzing] OS=Homo sapiens GN=ASNS PE=1 SV=4	G.GLDSSLVAA.T	FALSE	9	P08243	ASNS	class I	AML14_DCB
1128		>sp|P08243|ASNS_HUMAN Asparagine synthetase [glutamine-hydrolyzing] OS=Homo sapiens GN=ASNS PE=1 SV=4	A.TLLKQLKEA.Q	FALSE	9	P08243	ASNS	class I	AML14_DCB
1129	.[+42]	>sp|P62328|TYB4_HUMAN Thymosin beta-4 OS=Homo sapiens GN=TMSB4X PE=1 SV=2	M.[+42.011]SDKPDMAEIEKFDKS.K	FALSE	15	P62328	TMSB4X	class I	AML14_DCB
1130	.[+42]	>sp|P62328|TYB4_HUMAN Thymosin beta-4 OS=Homo sapiens GN=TMSB4X PE=1 SV=2	M.[+42.011]SDKPDMAEIEKFDKS.K	FALSE	15	P62328	TMSB4X	class I	AML14_DCB
1131		>sp|P62328|TYB4_HUMAN Thymosin beta-4 OS=Homo sapiens GN=TMSB4X PE=1 SV=2	K.NPLPSKETI.E	FALSE	9	P62328	TMSB4X	class I	AML14_DCB
1132		>sp|P62328|TYB4_HUMAN Thymosin beta-4 OS=Homo sapiens GN=TMSB4X PE=1 SV=2	K.NPLPSKETI.E	FALSE	9	P62328	TMSB4X	class I	AML14_DCB
1133		>sp|P62328|TYB4_HUMAN Thymosin beta-4 OS=Homo sapiens GN=TMSB4X PE=1 SV=2	K.NPLPSKETI.E	FALSE	9	P62328	TMSB4X	class I	AML14_DCB
1134		>sp|P62328|TYB4_HUMAN Thymosin beta-4 OS=Homo sapiens GN=TMSB4X PE=1 SV=2	P.SKETIEQEKQAGES.-	FALSE	14	P62328	TMSB4X	class I	AML14_DCB
1135		>sp|P62328|TYB4_HUMAN Thymosin beta-4 OS=Homo sapiens GN=TMSB4X PE=1 SV=2	T.IEQEKQAGES.-	FALSE	10	P62328	TMSB4X	class I	AML14_DCB
1136		>sp|P33991|MCM4_HUMAN DNA replication licensing factor MCM4 OS=Homo sapiens GN=MCM4 PE=1 SV=5	A.SEQSLGQKL.V	FALSE	9	P33991	MCM4	class I	AML14_DCB
1137		>sp|P33991|MCM4_HUMAN DNA replication licensing factor MCM4 OS=Homo sapiens GN=MCM4 PE=1 SV=5	L.VIWGTDVNV.A	FALSE	9	P33991	MCM4	class I	AML14_DCB
1138		>sp|P33991|MCM4_HUMAN DNA replication licensing factor MCM4 OS=Homo sapiens GN=MCM4 PE=1 SV=5	D.RYPDSILEH.Q	FALSE	9	P33991	MCM4	class I	AML14_DCB
1139		>sp|P33991|MCM4_HUMAN DNA replication licensing factor MCM4 OS=Homo sapiens GN=MCM4 PE=1 SV=5	D.RYPDSILEH.Q	FALSE	9	P33991	MCM4	class I	AML14_DCB
1140		>sp|P33991|MCM4_HUMAN DNA replication licensing factor MCM4 OS=Homo sapiens GN=MCM4 PE=1 SV=5	D.SILEHQIQV.R	FALSE	9	P33991	MCM4	class I	AML14_DCB
1141		>sp|P33991|MCM4_HUMAN DNA replication licensing factor MCM4 OS=Homo sapiens GN=MCM4 PE=1 SV=5	D.SILEHQIQV.R	FALSE	9	P33991	MCM4	class I	AML14_DCB
1142		>sp|P33991|MCM4_HUMAN DNA replication licensing factor MCM4 OS=Homo sapiens GN=MCM4 PE=1 SV=5	R.RLAHHLVAL.Y	FALSE	9	P33991	MCM4	class I	AML14_DCB
1143		>sp|P33991|MCM4_HUMAN DNA replication licensing factor MCM4 OS=Homo sapiens GN=MCM4 PE=1 SV=5	A.YPRQLESLI.R	FALSE	9	P33991	MCM4	class I	AML14_DCB
1144		>sp|P68371|TBB4B_HUMAN Tubulin beta-4B chain OS=Homo sapiens GN=TUBB4B PE=1 SV=1	R.INVYYNEATGGK.Y	FALSE	12	P68371	TUBB4B	class I	AML14_DCB
1145		>sp|P68371|TBB4B_HUMAN Tubulin beta-4B chain OS=Homo sapiens GN=TUBB4B PE=1 SV=1	G.HYTEGAEL.V	FALSE	8	P68371	TUBB4B	class I	AML14_DCB
1146		>sp|P68371|TBB4B_HUMAN Tubulin beta-4B chain OS=Homo sapiens GN=TUBB4B PE=1 SV=1	G.HYTEGAEL.V	FALSE	8	P68371	TUBB4B	class I	AML14_DCB
1147		>sp|P68371|TBB4B_HUMAN Tubulin beta-4B chain OS=Homo sapiens GN=TUBB4B PE=1 SV=1	G.HYTEGAEL.V	FALSE	8	P68371	TUBB4B	class I	AML14_DCB
1148		>sp|P68371|TBB4B_HUMAN Tubulin beta-4B chain OS=Homo sapiens GN=TUBB4B PE=1 SV=1	L.LISKIREEY.P	FALSE	9	P68371	TUBB4B	class I	AML14_DCB
1149		>sp|P68371|TBB4B_HUMAN Tubulin beta-4B chain OS=Homo sapiens GN=TUBB4B PE=1 SV=1	V.EPYNATLSV.H	FALSE	9	P68371	TUBB4B	class I	AML14_DCB
1150		>sp|P68371|TBB4B_HUMAN Tubulin beta-4B chain OS=Homo sapiens GN=TUBB4B PE=1 SV=1	V.EPYNATLSV.H	FALSE	9	P68371	TUBB4B	class I	AML14_DCB
1151		>sp|P68371|TBB4B_HUMAN Tubulin beta-4B chain OS=Homo sapiens GN=TUBB4B PE=1 SV=1	V.EPYNATLSV.H	FALSE	9	P68371	TUBB4B	class I	AML14_DCB
1152		>sp|P68371|TBB4B_HUMAN Tubulin beta-4B chain OS=Homo sapiens GN=TUBB4B PE=1 SV=1	G.RYLTVAAVF.R	FALSE	9	P68371	TUBB4B	class I	AML14_DCB
1153		>sp|P68371|TBB4B_HUMAN Tubulin beta-4B chain OS=Homo sapiens GN=TUBB4B PE=1 SV=1	G.RYLTVAAVF.R	FALSE	9	P68371	TUBB4B	class I	AML14_DCB
1154		>sp|P35222|CTNB1_HUMAN Catenin beta-1 OS=Homo sapiens GN=CTNNB1 PE=1 SV=1	D.DAELATRAI.P	FALSE	9	P35222	CTNNB1	class I	AML14_DCB
1155		>sp|P35222|CTNB1_HUMAN Catenin beta-1 OS=Homo sapiens GN=CTNNB1 PE=1 SV=1	D.DAELATRAI.P	FALSE	9	P35222	CTNNB1	class I	AML14_DCB
1156		>sp|P35222|CTNB1_HUMAN Catenin beta-1 OS=Homo sapiens GN=CTNNB1 PE=1 SV=1	M.AQNAVRLHY.G	FALSE	9	P35222	CTNNB1	class I	AML14_DCB
1157		>sp|P35222|CTNB1_HUMAN Catenin beta-1 OS=Homo sapiens GN=CTNNB1 PE=1 SV=1	M.AQNAVRLHY.G	FALSE	9	P35222	CTNNB1	class I	AML14_DCB
1158		>sp|P35222|CTNB1_HUMAN Catenin beta-1 OS=Homo sapiens GN=CTNNB1 PE=1 SV=1	H.YGLPVVVKL.L	FALSE	9	P35222	CTNNB1	class I	AML14_DCB
1159		>sp|P35222|CTNB1_HUMAN Catenin beta-1 OS=Homo sapiens GN=CTNNB1 PE=1 SV=1	L.HPPSHWPLI.K	FALSE	9	P35222	CTNNB1	class I	AML14_DCB
1160		>sp|P35222|CTNB1_HUMAN Catenin beta-1 OS=Homo sapiens GN=CTNNB1 PE=1 SV=1	L.HPPSHWPLI.K	FALSE	9	P35222	CTNNB1	class I	AML14_DCB
1161		>sp|P35222|CTNB1_HUMAN Catenin beta-1 OS=Homo sapiens GN=CTNNB1 PE=1 SV=1	L.HPPSHWPLI.K	FALSE	9	P35222	CTNNB1	class I	AML14_DCB
1162		>sp|P35222|CTNB1_HUMAN Catenin beta-1 OS=Homo sapiens GN=CTNNB1 PE=1 SV=1	L.HPPSHWPLI.K	FALSE	9	P35222	CTNNB1	class I	AML14_DCB
1163		>sp|P35222|CTNB1_HUMAN Catenin beta-1 OS=Homo sapiens GN=CTNNB1 PE=1 SV=1	L.HPPSHWPLI.K	FALSE	9	P35222	CTNNB1	class I	AML14_DCB
1164		>sp|P35222|CTNB1_HUMAN Catenin beta-1 OS=Homo sapiens GN=CTNNB1 PE=1 SV=1	L.HPPSHWPLI.K	FALSE	9	P35222	CTNNB1	class I	AML14_DCB
1165		>sp|Q96LB3|IFT74_HUMAN Intraflagellar transport protein 74 homolog OS=Homo sapiens GN=IFT74 PE=1 SV=1	E.KQATDDIIKNMSF.E	FALSE	13	Q96LB3	IFT74	class I	AML14_DCB
1166		>sp|Q96LB3|IFT74_HUMAN Intraflagellar transport protein 74 homolog OS=Homo sapiens GN=IFT74 PE=1 SV=1	E.KQATDDIIKNMSF.E	FALSE	13	Q96LB3	IFT74	class I	AML14_DCB
1167		>sp|Q96LB3|IFT74_HUMAN Intraflagellar transport protein 74 homolog OS=Homo sapiens GN=IFT74 PE=1 SV=1	E.KQATDDIIKNMSF.E	FALSE	13	Q96LB3	IFT74	class I	AML14_DCB
1168		>sp|Q96LB3|IFT74_HUMAN Intraflagellar transport protein 74 homolog OS=Homo sapiens GN=IFT74 PE=1 SV=1	E.KQATDDIIKNMSF.E	FALSE	13	Q96LB3	IFT74	class I	AML14_DCB
1169	M[+16]	>sp|Q96LB3|IFT74_HUMAN Intraflagellar transport protein 74 homolog OS=Homo sapiens GN=IFT74 PE=1 SV=1	E.KQATDDIIKNM[+15.995]SF.E	FALSE	13	Q96LB3	IFT74	class I	AML14_DCB
1170	M[+16]	>sp|Q96LB3|IFT74_HUMAN Intraflagellar transport protein 74 homolog OS=Homo sapiens GN=IFT74 PE=1 SV=1	E.KQATDDIIKNM[+15.995]SF.E	FALSE	13	Q96LB3	IFT74	class I	AML14_DCB
1171	M[+16]	>sp|Q96LB3|IFT74_HUMAN Intraflagellar transport protein 74 homolog OS=Homo sapiens GN=IFT74 PE=1 SV=1	E.KQATDDIIKNM[+15.995]SF.E	FALSE	13	Q96LB3	IFT74	class I	AML14_DCB
1172		>sp|Q96LB3|IFT74_HUMAN Intraflagellar transport protein 74 homolog OS=Homo sapiens GN=IFT74 PE=1 SV=1	S.KMTEEQHSL.K	FALSE	9	Q96LB3	IFT74	class I	AML14_DCB
1173		>sp|O00182-2|LEG9_HUMAN Isoform 2 of Galectin-9 OS=Homo sapiens GN=LGALS9	R.VPFHRVDTI.S	FALSE	9	O00182-2	LGALS9	class I	AML14_DCB
1174		>sp|O00182-2|LEG9_HUMAN Isoform 2 of Galectin-9 OS=Homo sapiens GN=LGALS9	R.VPFHRVDTI.S	FALSE	9	O00182-2	LGALS9	class I	AML14_DCB
1175		>sp|O00182-2|LEG9_HUMAN Isoform 2 of Galectin-9 OS=Homo sapiens GN=LGALS9	R.VPFHRVDTI.S	FALSE	9	O00182-2	LGALS9	class I	AML14_DCB
1176		>sp|O00182-2|LEG9_HUMAN Isoform 2 of Galectin-9 OS=Homo sapiens GN=LGALS9	R.VPFHRVDTI.S	FALSE	9	O00182-2	LGALS9	class I	AML14_DCB
1177		>sp|O00182-2|LEG9_HUMAN Isoform 2 of Galectin-9 OS=Homo sapiens GN=LGALS9	V.PFHRVDTI.S	FALSE	8	O00182-2	LGALS9	class I	AML14_DCB
1178		>sp|O00182-2|LEG9_HUMAN Isoform 2 of Galectin-9 OS=Homo sapiens GN=LGALS9	S.YISFQPPGV.W	FALSE	9	O00182-2	LGALS9	class I	AML14_DCB
1179		>sp|O00182-2|LEG9_HUMAN Isoform 2 of Galectin-9 OS=Homo sapiens GN=LGALS9	S.YISFQPPGV.W	FALSE	9	O00182-2	LGALS9	class I	AML14_DCB
1180		>sp|O00182-2|LEG9_HUMAN Isoform 2 of Galectin-9 OS=Homo sapiens GN=LGALS9	Q.HLFEYYHRL.R	FALSE	9	O00182-2	LGALS9	class I	AML14_DCB
1181		>sp|P40306|PSB10_HUMAN Proteasome subunit beta type-10 OS=Homo sapiens GN=PSMB10 PE=1 SV=1	A.DAEMTTRMV.A	FALSE	9	P40306	PSMB10	class I	AML14_DCB
1182		>sp|P40306|PSB10_HUMAN Proteasome subunit beta type-10 OS=Homo sapiens GN=PSMB10 PE=1 SV=1	A.DAEMTTRMV.A	FALSE	9	P40306	PSMB10	class I	AML14_DCB
1183		>sp|P40306|PSB10_HUMAN Proteasome subunit beta type-10 OS=Homo sapiens GN=PSMB10 PE=1 SV=1	A.DAEMTTRMV.A	FALSE	9	P40306	PSMB10	class I	AML14_DCB
1184		>sp|P40306|PSB10_HUMAN Proteasome subunit beta type-10 OS=Homo sapiens GN=PSMB10 PE=1 SV=1	A.DAEMTTRMV.A	FALSE	9	P40306	PSMB10	class I	AML14_DCB
1185		>sp|P40306|PSB10_HUMAN Proteasome subunit beta type-10 OS=Homo sapiens GN=PSMB10 PE=1 SV=1	A.DAEMTTRMV.A	FALSE	9	P40306	PSMB10	class I	AML14_DCB
1186	M[+16]	>sp|P40306|PSB10_HUMAN Proteasome subunit beta type-10 OS=Homo sapiens GN=PSMB10 PE=1 SV=1	A.DAEMTTRM[+15.995]V.A	FALSE	9	P40306	PSMB10	class I	AML14_DCB
1187	M[+16]	>sp|P40306|PSB10_HUMAN Proteasome subunit beta type-10 OS=Homo sapiens GN=PSMB10 PE=1 SV=1	A.DAEMTTRM[+15.995]V.A	FALSE	9	P40306	PSMB10	class I	AML14_DCB
1188	M[+16]	>sp|P40306|PSB10_HUMAN Proteasome subunit beta type-10 OS=Homo sapiens GN=PSMB10 PE=1 SV=1	A.DAEMTTRM[+15.995]V.A	FALSE	9	P40306	PSMB10	class I	AML14_DCB
1189	M[+16]	>sp|P40306|PSB10_HUMAN Proteasome subunit beta type-10 OS=Homo sapiens GN=PSMB10 PE=1 SV=1	A.DAEM[+15.995]TTRMV.A	FALSE	9	P40306	PSMB10	class I	AML14_DCB
1190	M[+16]	>sp|P40306|PSB10_HUMAN Proteasome subunit beta type-10 OS=Homo sapiens GN=PSMB10 PE=1 SV=1	A.DAEM[+15.995]TTRMV.A	FALSE	9	P40306	PSMB10	class I	AML14_DCB
1191	M[+16]	>sp|P40306|PSB10_HUMAN Proteasome subunit beta type-10 OS=Homo sapiens GN=PSMB10 PE=1 SV=1	A.DAEMTTRM[+15.995]V.A	FALSE	9	P40306	PSMB10	class I	AML14_DCB
1192	M[+16]*2	>sp|P40306|PSB10_HUMAN Proteasome subunit beta type-10 OS=Homo sapiens GN=PSMB10 PE=1 SV=1	A.DAEM[+15.995]TTRM[+15.995]V.A	FALSE	9	P40306	PSMB10	class I	AML14_DCB
1193	M[+16]*2	>sp|P40306|PSB10_HUMAN Proteasome subunit beta type-10 OS=Homo sapiens GN=PSMB10 PE=1 SV=1	A.DAEM[+15.995]TTRM[+15.995]V.A	FALSE	9	P40306	PSMB10	class I	AML14_DCB
1194	M[+16]*2	>sp|P40306|PSB10_HUMAN Proteasome subunit beta type-10 OS=Homo sapiens GN=PSMB10 PE=1 SV=1	A.DAEM[+15.995]TTRM[+15.995]V.A	FALSE	9	P40306	PSMB10	class I	AML14_DCB
1195		>sp|P62750|RL23A_HUMAN 60S ribosomal protein L23a OS=Homo sapiens GN=RPL23A PE=1 SV=1	K.KLYDIDVAKV.N	FALSE	10	P62750	RPL23A	class I	AML14_DCB
1196		>sp|P62750|RL23A_HUMAN 60S ribosomal protein L23a OS=Homo sapiens GN=RPL23A PE=1 SV=1	K.KLYDIDVAKV.N	FALSE	10	P62750	RPL23A	class I	AML14_DCB
1197		>sp|P62750|RL23A_HUMAN 60S ribosomal protein L23a OS=Homo sapiens GN=RPL23A PE=1 SV=1	K.KLYDIDVAKV.N	FALSE	10	P62750	RPL23A	class I	AML14_DCB
1198		>sp|P62750|RL23A_HUMAN 60S ribosomal protein L23a OS=Homo sapiens GN=RPL23A PE=1 SV=1	Y.DALDVANKI.G	FALSE	9	P62750	RPL23A	class I	AML14_DCB
1199		>sp|P62750|RL23A_HUMAN 60S ribosomal protein L23a OS=Homo sapiens GN=RPL23A PE=1 SV=1	Y.DALDVANKI.G	FALSE	9	P62750	RPL23A	class I	AML14_DCB
1200		>sp|P62750|RL23A_HUMAN 60S ribosomal protein L23a OS=Homo sapiens GN=RPL23A PE=1 SV=1	Y.DALDVANKI.G	FALSE	9	P62750	RPL23A	class I	AML14_DCB
1201		>sp|P62750|RL23A_HUMAN 60S ribosomal protein L23a OS=Homo sapiens GN=RPL23A PE=1 SV=1	Y.DALDVANKI.G	FALSE	9	P62750	RPL23A	class I	AML14_DCB
1202		>sp|P62750|RL23A_HUMAN 60S ribosomal protein L23a OS=Homo sapiens GN=RPL23A PE=1 SV=1	Y.DALDVANKIGII.-	FALSE	12	P62750	RPL23A	class I	AML14_DCB
1203		>sp|P52789|HXK2_HUMAN Hexokinase-2 OS=Homo sapiens GN=HK2 PE=1 SV=2	L.ALDLGGTNF.R	FALSE	9	P52789	HK2	class I	AML14_DCB
1204		>sp|P52789|HXK2_HUMAN Hexokinase-2 OS=Homo sapiens GN=HK2 PE=1 SV=2	A.TLAAVLQRI.K	FALSE	9	P52789	HK2	class I	AML14_DCB
1205		>sp|P52789|HXK2_HUMAN Hexokinase-2 OS=Homo sapiens GN=HK2 PE=1 SV=2	T.LAAVLQRI.K	FALSE	8	P52789	HK2	class I	AML14_DCB
1206		>sp|P52789|HXK2_HUMAN Hexokinase-2 OS=Homo sapiens GN=HK2 PE=1 SV=2	D.DSIIVKEV.C	FALSE	8	P52789	HK2	class I	AML14_DCB
1207		>sp|P52789|HXK2_HUMAN Hexokinase-2 OS=Homo sapiens GN=HK2 PE=1 SV=2	R.GLDALKVTV.G	FALSE	9	P52789	HK2	class I	AML14_DCB
1208		>sp|P52789|HXK2_HUMAN Hexokinase-2 OS=Homo sapiens GN=HK2 PE=1 SV=2	R.GLDALKVTV.G	FALSE	9	P52789	HK2	class I	AML14_DCB
1209		>sp|P52789|HXK2_HUMAN Hexokinase-2 OS=Homo sapiens GN=HK2 PE=1 SV=2	L.DALKVTVGV.D	FALSE	9	P52789	HK2	class I	AML14_DCB
1210		>sp|P52789|HXK2_HUMAN Hexokinase-2 OS=Homo sapiens GN=HK2 PE=1 SV=2	L.DALKVTVGV.D	FALSE	9	P52789	HK2	class I	AML14_DCB
1211		>sp|P52789|HXK2_HUMAN Hexokinase-2 OS=Homo sapiens GN=HK2 PE=1 SV=2	L.DALKVTVGV.D	FALSE	9	P52789	HK2	class I	AML14_DCB
1212		>sp|A5YKK6|CNOT1_HUMAN CCR4-NOT transcription complex subunit 1 OS=Homo sapiens GN=CNOT1 PE=1 SV=2	K.GLHNVVYGI.Q	FALSE	9	A5YKK6	CNOT1	class I	AML14_DCB
1213		>sp|A5YKK6|CNOT1_HUMAN CCR4-NOT transcription complex subunit 1 OS=Homo sapiens GN=CNOT1 PE=1 SV=2	S.KMKPSDLSQVW.P	FALSE	11	A5YKK6	CNOT1	class I	AML14_DCB
1214		>sp|A5YKK6|CNOT1_HUMAN CCR4-NOT transcription complex subunit 1 OS=Homo sapiens GN=CNOT1 PE=1 SV=2	Q.FPHHLQEYI.E	FALSE	9	A5YKK6	CNOT1	class I	AML14_DCB
1215		>sp|A5YKK6|CNOT1_HUMAN CCR4-NOT transcription complex subunit 1 OS=Homo sapiens GN=CNOT1 PE=1 SV=2	Q.FPHHLQEYI.E	FALSE	9	A5YKK6	CNOT1	class I	AML14_DCB
1216		>sp|A5YKK6|CNOT1_HUMAN CCR4-NOT transcription complex subunit 1 OS=Homo sapiens GN=CNOT1 PE=1 SV=2	Q.FPHHLQEYI.E	FALSE	9	A5YKK6	CNOT1	class I	AML14_DCB
1217		>sp|A5YKK6|CNOT1_HUMAN CCR4-NOT transcription complex subunit 1 OS=Homo sapiens GN=CNOT1 PE=1 SV=2	L.YVVPFVAKV.L	FALSE	9	A5YKK6	CNOT1	class I	AML14_DCB
1218		>sp|A5YKK6|CNOT1_HUMAN CCR4-NOT transcription complex subunit 1 OS=Homo sapiens GN=CNOT1 PE=1 SV=2	L.YVVPFVAKV.L	FALSE	9	A5YKK6	CNOT1	class I	AML14_DCB
1219		>sp|A5YKK6|CNOT1_HUMAN CCR4-NOT transcription complex subunit 1 OS=Homo sapiens GN=CNOT1 PE=1 SV=2	Q.LPYHRIFIM.L	FALSE	9	A5YKK6	CNOT1	class I	AML14_DCB
1220		>sp|A5YKK6|CNOT1_HUMAN CCR4-NOT transcription complex subunit 1 OS=Homo sapiens GN=CNOT1 PE=1 SV=2	K.YLAPFLRNV.E	FALSE	9	A5YKK6	CNOT1	class I	AML14_DCB
1221		>sp|Q9UH99|SUN2_HUMAN SUN domain-containing protein 2 OS=Homo sapiens GN=SUN2 PE=1 SV=3	Y.SESLVHESW.F	FALSE	9	Q9UH99	SUN2	class I	AML14_DCB
1222		>sp|Q9UH99|SUN2_HUMAN SUN domain-containing protein 2 OS=Homo sapiens GN=SUN2 PE=1 SV=3	Y.SESLVHESW.F	FALSE	9	Q9UH99	SUN2	class I	AML14_DCB
1223		>sp|Q9UH99|SUN2_HUMAN SUN domain-containing protein 2 OS=Homo sapiens GN=SUN2 PE=1 SV=3	Y.FYPYGLQTF.H	FALSE	9	Q9UH99	SUN2	class I	AML14_DCB
1224		>sp|Q9UH99|SUN2_HUMAN SUN domain-containing protein 2 OS=Homo sapiens GN=SUN2 PE=1 SV=3	Y.FYPYGLQTF.H	FALSE	9	Q9UH99	SUN2	class I	AML14_DCB
1225		>sp|Q9UH99|SUN2_HUMAN SUN domain-containing protein 2 OS=Homo sapiens GN=SUN2 PE=1 SV=3	Y.FYPYGLQTF.H	FALSE	9	Q9UH99	SUN2	class I	AML14_DCB
1226		>sp|Q9UH99|SUN2_HUMAN SUN domain-containing protein 2 OS=Homo sapiens GN=SUN2 PE=1 SV=3	Y.FYPYGLQTF.H	FALSE	9	Q9UH99	SUN2	class I	AML14_DCB
1227		>sp|Q9UH99|SUN2_HUMAN SUN domain-containing protein 2 OS=Homo sapiens GN=SUN2 PE=1 SV=3	Y.FYPYGLQTF.H	FALSE	9	Q9UH99	SUN2	class I	AML14_DCB
1228		>sp|Q9UH99|SUN2_HUMAN SUN domain-containing protein 2 OS=Homo sapiens GN=SUN2 PE=1 SV=3	Q.RVMSRVHSL.E	FALSE	9	Q9UH99	SUN2	class I	AML14_DCB
1229		>sp|Q9UH99|SUN2_HUMAN SUN domain-containing protein 2 OS=Homo sapiens GN=SUN2 PE=1 SV=3	A.RIQQLKSEW.Q	FALSE	9	Q9UH99	SUN2	class I	AML14_DCB
1230		>sp|Q9UH99|SUN2_HUMAN SUN domain-containing protein 2 OS=Homo sapiens GN=SUN2 PE=1 SV=3	A.RIQQLKSEW.Q	FALSE	9	Q9UH99	SUN2	class I	AML14_DCB
1231		>sp|Q9UH99|SUN2_HUMAN SUN domain-containing protein 2 OS=Homo sapiens GN=SUN2 PE=1 SV=3	L.TLQKEGVIGV.T	FALSE	10	Q9UH99	SUN2	class I	AML14_DCB
1232		>sp|Q9NNW5|WDR6_HUMAN WD repeat-containing protein 6 OS=Homo sapiens GN=WDR6 PE=1 SV=1	G.DAWKELTI.V	FALSE	8	Q9NNW5	WDR6	class I	AML14_DCB
1233		>sp|Q9NNW5|WDR6_HUMAN WD repeat-containing protein 6 OS=Homo sapiens GN=WDR6 PE=1 SV=1	G.DAWKELTIV.A	FALSE	9	Q9NNW5	WDR6	class I	AML14_DCB
1234		>sp|Q9NNW5|WDR6_HUMAN WD repeat-containing protein 6 OS=Homo sapiens GN=WDR6 PE=1 SV=1	A.SEDRSVRIW.K	FALSE	9	Q9NNW5	WDR6	class I	AML14_DCB
1235		>sp|Q9NNW5|WDR6_HUMAN WD repeat-containing protein 6 OS=Homo sapiens GN=WDR6 PE=1 SV=1	S.HEGEILQAF.R	FALSE	9	Q9NNW5	WDR6	class I	AML14_DCB
1236		>sp|Q9NNW5|WDR6_HUMAN WD repeat-containing protein 6 OS=Homo sapiens GN=WDR6 PE=1 SV=1	S.HEGEILQAF.R	FALSE	9	Q9NNW5	WDR6	class I	AML14_DCB
1237		>sp|Q9NNW5|WDR6_HUMAN WD repeat-containing protein 6 OS=Homo sapiens GN=WDR6 PE=1 SV=1	Q.TLFPGKVHSL.S	FALSE	10	Q9NNW5	WDR6	class I	AML14_DCB
1238		>sp|Q9NNW5|WDR6_HUMAN WD repeat-containing protein 6 OS=Homo sapiens GN=WDR6 PE=1 SV=1	Q.TLFPGKVHSL.S	FALSE	10	Q9NNW5	WDR6	class I	AML14_DCB
1239		>sp|Q9NNW5|WDR6_HUMAN WD repeat-containing protein 6 OS=Homo sapiens GN=WDR6 PE=1 SV=1	Q.TLFPGKVHSL.S	FALSE	10	Q9NNW5	WDR6	class I	AML14_DCB
1240		>sp|Q9NNW5|WDR6_HUMAN WD repeat-containing protein 6 OS=Homo sapiens GN=WDR6 PE=1 SV=1	T.LFPGKVHSL.S	FALSE	9	Q9NNW5	WDR6	class I	AML14_DCB
1241		>sp|P57740|NU107_HUMAN Nuclear pore complex protein Nup107 OS=Homo sapiens GN=NUP107 PE=1 SV=1	A.KSVYWENTL.H	FALSE	9	P57740	NUP107	class I	AML14_DCB
1242		>sp|P57740|NU107_HUMAN Nuclear pore complex protein Nup107 OS=Homo sapiens GN=NUP107 PE=1 SV=1	A.KSVYWENTL.H	FALSE	9	P57740	NUP107	class I	AML14_DCB
1243		>sp|P57740|NU107_HUMAN Nuclear pore complex protein Nup107 OS=Homo sapiens GN=NUP107 PE=1 SV=1	A.KSVYWENTL.H	FALSE	9	P57740	NUP107	class I	AML14_DCB
1244		>sp|P57740|NU107_HUMAN Nuclear pore complex protein Nup107 OS=Homo sapiens GN=NUP107 PE=1 SV=1	A.KSVYWENTL.H	FALSE	9	P57740	NUP107	class I	AML14_DCB
1245		>sp|P57740|NU107_HUMAN Nuclear pore complex protein Nup107 OS=Homo sapiens GN=NUP107 PE=1 SV=1	V.RLLKYLFTL.I	FALSE	9	P57740	NUP107	class I	AML14_DCB
1246		>sp|P57740|NU107_HUMAN Nuclear pore complex protein Nup107 OS=Homo sapiens GN=NUP107 PE=1 SV=1	M.AEDELFNRY.E	FALSE	9	P57740	NUP107	class I	AML14_DCB
1247		>sp|P57740|NU107_HUMAN Nuclear pore complex protein Nup107 OS=Homo sapiens GN=NUP107 PE=1 SV=1	R.AYLEAHETF.N	FALSE	9	P57740	NUP107	class I	AML14_DCB
1248		>sp|P57740|NU107_HUMAN Nuclear pore complex protein Nup107 OS=Homo sapiens GN=NUP107 PE=1 SV=1	R.AYLEAHETF.N	FALSE	9	P57740	NUP107	class I	AML14_DCB
1249		>sp|P57740|NU107_HUMAN Nuclear pore complex protein Nup107 OS=Homo sapiens GN=NUP107 PE=1 SV=1	R.AYLEAHETF.N	FALSE	9	P57740	NUP107	class I	AML14_DCB
1250		>sp|Q8NF50|DOCK8_HUMAN Dedicator of cytokinesis protein 8 OS=Homo sapiens GN=DOCK8 PE=1 SV=3	I.YLVVKIEKV.L	FALSE	9	Q8NF50	DOCK8	class I	AML14_DCB
1251		>sp|Q8NF50|DOCK8_HUMAN Dedicator of cytokinesis protein 8 OS=Homo sapiens GN=DOCK8 PE=1 SV=3	I.YLVVKIEKV.L	FALSE	9	Q8NF50	DOCK8	class I	AML14_DCB
1252		>sp|Q8NF50|DOCK8_HUMAN Dedicator of cytokinesis protein 8 OS=Homo sapiens GN=DOCK8 PE=1 SV=3	S.SFQDQKIASM.F	FALSE	10	Q8NF50	DOCK8	class I	AML14_DCB
1253		>sp|Q8NF50|DOCK8_HUMAN Dedicator of cytokinesis protein 8 OS=Homo sapiens GN=DOCK8 PE=1 SV=3	S.SFQDQKIASM.F	FALSE	10	Q8NF50	DOCK8	class I	AML14_DCB
1254		>sp|Q8NF50|DOCK8_HUMAN Dedicator of cytokinesis protein 8 OS=Homo sapiens GN=DOCK8 PE=1 SV=3	S.LPYKQYNML.N	FALSE	9	Q8NF50	DOCK8	class I	AML14_DCB
1255		>sp|Q8NF50|DOCK8_HUMAN Dedicator of cytokinesis protein 8 OS=Homo sapiens GN=DOCK8 PE=1 SV=3	S.LPYKQYNML.N	FALSE	9	Q8NF50	DOCK8	class I	AML14_DCB
1256		>sp|Q8NF50|DOCK8_HUMAN Dedicator of cytokinesis protein 8 OS=Homo sapiens GN=DOCK8 PE=1 SV=3	W.IADLPSTQL.N	FALSE	9	Q8NF50	DOCK8	class I	AML14_DCB
1257		>sp|Q8NF50|DOCK8_HUMAN Dedicator of cytokinesis protein 8 OS=Homo sapiens GN=DOCK8 PE=1 SV=3	W.IADLPSTQL.N	FALSE	9	Q8NF50	DOCK8	class I	AML14_DCB
1258		>sp|Q8NF50|DOCK8_HUMAN Dedicator of cytokinesis protein 8 OS=Homo sapiens GN=DOCK8 PE=1 SV=3	E.KLDKTKAEL.D	FALSE	9	Q8NF50	DOCK8	class I	AML14_DCB
1259		>sp|Q8NF50|DOCK8_HUMAN Dedicator of cytokinesis protein 8 OS=Homo sapiens GN=DOCK8 PE=1 SV=3	G.GLYETVNEV.Y	FALSE	9	Q8NF50	DOCK8	class I	AML14_DCB
1260		>sp|Q8NF50|DOCK8_HUMAN Dedicator of cytokinesis protein 8 OS=Homo sapiens GN=DOCK8 PE=1 SV=3	G.GLYETVNEV.Y	FALSE	9	Q8NF50	DOCK8	class I	AML14_DCB
1261		>sp|Q8NF50|DOCK8_HUMAN Dedicator of cytokinesis protein 8 OS=Homo sapiens GN=DOCK8 PE=1 SV=3	G.GLYETVNEV.Y	FALSE	9	Q8NF50	DOCK8	class I	AML14_DCB
1262		>sp|Q8NF50|DOCK8_HUMAN Dedicator of cytokinesis protein 8 OS=Homo sapiens GN=DOCK8 PE=1 SV=3	L.AEIPADPKLY.R	FALSE	10	Q8NF50	DOCK8	class I	AML14_DCB
1263		>sp|Q8NF50|DOCK8_HUMAN Dedicator of cytokinesis protein 8 OS=Homo sapiens GN=DOCK8 PE=1 SV=3	L.AEIPADPKLY.R	FALSE	10	Q8NF50	DOCK8	class I	AML14_DCB
1264		>sp|Q8NF50|DOCK8_HUMAN Dedicator of cytokinesis protein 8 OS=Homo sapiens GN=DOCK8 PE=1 SV=3	L.AEIPADPKLY.R	FALSE	10	Q8NF50	DOCK8	class I	AML14_DCB
1265		>sp|Q53GS7|GLE1_HUMAN Nucleoporin GLE1 OS=Homo sapiens GN=GLE1 PE=1 SV=2	V.RMYELVHRM.K	FALSE	9	Q53GS7	GLE1	class I	AML14_DCB
1266		>sp|Q53GS7|GLE1_HUMAN Nucleoporin GLE1 OS=Homo sapiens GN=GLE1 PE=1 SV=2	V.RMYELVHRM.K	FALSE	9	Q53GS7	GLE1	class I	AML14_DCB
1267	M[+16]	>sp|Q53GS7|GLE1_HUMAN Nucleoporin GLE1 OS=Homo sapiens GN=GLE1 PE=1 SV=2	V.RM[+15.995]YELVHRM.K	FALSE	9	Q53GS7	GLE1	class I	AML14_DCB
1268		>sp|Q53GS7|GLE1_HUMAN Nucleoporin GLE1 OS=Homo sapiens GN=GLE1 PE=1 SV=2	C.SLISGIIRA.S	FALSE	9	Q53GS7	GLE1	class I	AML14_DCB
1269	M[+16]	>sp|Q53GS7|GLE1_HUMAN Nucleoporin GLE1 OS=Homo sapiens GN=GLE1 PE=1 SV=2	V.KVQDITM[+15.995]QW.Y	FALSE	9	Q53GS7	GLE1	class I	AML14_DCB
1270		>sp|Q71DI3|H32_HUMAN Histone H3.2 OS=Homo sapiens GN=HIST2H3A PE=1 SV=3	R.YRPGTVALR.E	FALSE	9	Q71DI3	HIST2H3A	class I	AML14_DCB
1271		>sp|Q71DI3|H32_HUMAN Histone H3.2 OS=Homo sapiens GN=HIST2H3A PE=1 SV=3	L.RFQSSAVM.A	FALSE	8	Q71DI3	HIST2H3A	class I	AML14_DCB
1272		>sp|Q71DI3|H32_HUMAN Histone H3.2 OS=Homo sapiens GN=HIST2H3A PE=1 SV=3	L.RFQSSAVM.A	FALSE	8	Q71DI3	HIST2H3A	class I	AML14_DCB
1273		>sp|Q71DI3|H32_HUMAN Histone H3.2 OS=Homo sapiens GN=HIST2H3A PE=1 SV=3	L.RFQSSAVM.A	FALSE	8	Q71DI3	HIST2H3A	class I	AML14_DCB
1274		>sp|Q71DI3|H32_HUMAN Histone H3.2 OS=Homo sapiens GN=HIST2H3A PE=1 SV=3	L.RFQSSAVM.A	FALSE	8	Q71DI3	HIST2H3A	class I	AML14_DCB
1275		>sp|Q71DI3|H32_HUMAN Histone H3.2 OS=Homo sapiens GN=HIST2H3A PE=1 SV=3	L.RFQSSAVM.A	FALSE	8	Q71DI3	HIST2H3A	class I	AML14_DCB
1276	M[+16]	>sp|Q71DI3|H32_HUMAN Histone H3.2 OS=Homo sapiens GN=HIST2H3A PE=1 SV=3	L.RFQSSAVM[+15.995].A	FALSE	8	Q71DI3	HIST2H3A	class I	AML14_DCB
1277	M[+16]	>sp|Q71DI3|H32_HUMAN Histone H3.2 OS=Homo sapiens GN=HIST2H3A PE=1 SV=3	L.RFQSSAVM[+15.995].A	FALSE	8	Q71DI3	HIST2H3A	class I	AML14_DCB
1278	M[+16]	>sp|Q71DI3|H32_HUMAN Histone H3.2 OS=Homo sapiens GN=HIST2H3A PE=1 SV=3	L.RFQSSAVM[+15.995].A	FALSE	8	Q71DI3	HIST2H3A	class I	AML14_DCB
1279	M[+16]	>sp|Q71DI3|H32_HUMAN Histone H3.2 OS=Homo sapiens GN=HIST2H3A PE=1 SV=3	L.RFQSSAVM[+15.995].A	FALSE	8	Q71DI3	HIST2H3A	class I	AML14_DCB
1280		>sp|Q71DI3|H32_HUMAN Histone H3.2 OS=Homo sapiens GN=HIST2H3A PE=1 SV=3	M.ALQEASEAYL.V	FALSE	10	Q71DI3	HIST2H3A	class I	AML14_DCB
1281		>sp|Q71DI3|H32_HUMAN Histone H3.2 OS=Homo sapiens GN=HIST2H3A PE=1 SV=3	M.ALQEASEAYL.V	FALSE	10	Q71DI3	HIST2H3A	class I	AML14_DCB
1282		>sp|Q71DI3|H32_HUMAN Histone H3.2 OS=Homo sapiens GN=HIST2H3A PE=1 SV=3	M.ALQEASEAYL.V	FALSE	10	Q71DI3	HIST2H3A	class I	AML14_DCB
1283		>sp|Q71DI3|H32_HUMAN Histone H3.2 OS=Homo sapiens GN=HIST2H3A PE=1 SV=3	M.ALQEASEAYL.V	FALSE	10	Q71DI3	HIST2H3A	class I	AML14_DCB
1284		>sp|P78371|TCPB_HUMAN T-complex protein 1 subunit beta OS=Homo sapiens GN=CCT2 PE=1 SV=4	E.AESLIAKKI.H	FALSE	9	P78371	CCT2	class I	AML14_DCB
1285		>sp|P78371|TCPB_HUMAN T-complex protein 1 subunit beta OS=Homo sapiens GN=CCT2 PE=1 SV=4	A.ESLIAKKI.H	FALSE	8	P78371	CCT2	class I	AML14_DCB
1286		>sp|P78371|TCPB_HUMAN T-complex protein 1 subunit beta OS=Homo sapiens GN=CCT2 PE=1 SV=4	G.FLLDKKIGV.N	FALSE	9	P78371	CCT2	class I	AML14_DCB
1287		>sp|P78371|TCPB_HUMAN T-complex protein 1 subunit beta OS=Homo sapiens GN=CCT2 PE=1 SV=4	G.FLLDKKIGV.N	FALSE	9	P78371	CCT2	class I	AML14_DCB
1288		>sp|P78371|TCPB_HUMAN T-complex protein 1 subunit beta OS=Homo sapiens GN=CCT2 PE=1 SV=4	G.FLLDKKIGV.N	FALSE	9	P78371	CCT2	class I	AML14_DCB
1289		>sp|P78371|TCPB_HUMAN T-complex protein 1 subunit beta OS=Homo sapiens GN=CCT2 PE=1 SV=4	G.FLLDKKIGV.N	FALSE	9	P78371	CCT2	class I	AML14_DCB
1290		>sp|P78371|TCPB_HUMAN T-complex protein 1 subunit beta OS=Homo sapiens GN=CCT2 PE=1 SV=4	A.STFDHPELVKL.G	FALSE	11	P78371	CCT2	class I	AML14_DCB
1291		>sp|P28070|PSB4_HUMAN Proteasome subunit beta type-4 OS=Homo sapiens GN=PSMB4 PE=1 SV=4	D.SFMDPASAL.Y	FALSE	9	P28070	PSMB4	class I	AML14_DCB
1292		>sp|P28070|PSB4_HUMAN Proteasome subunit beta type-4 OS=Homo sapiens GN=PSMB4 PE=1 SV=4	D.SFMDPASAL.Y	FALSE	9	P28070	PSMB4	class I	AML14_DCB
1293	M[+16]	>sp|P28070|PSB4_HUMAN Proteasome subunit beta type-4 OS=Homo sapiens GN=PSMB4 PE=1 SV=4	D.SFM[+15.995]DPASAL.Y	FALSE	9	P28070	PSMB4	class I	AML14_DCB
1294		>sp|P28070|PSB4_HUMAN Proteasome subunit beta type-4 OS=Homo sapiens GN=PSMB4 PE=1 SV=4	D.EELLGDGHSY.S	FALSE	10	P28070	PSMB4	class I	AML14_DCB
1295		>sp|P28070|PSB4_HUMAN Proteasome subunit beta type-4 OS=Homo sapiens GN=PSMB4 PE=1 SV=4	D.EELLGDGHSY.S	FALSE	10	P28070	PSMB4	class I	AML14_DCB
1296		>sp|P28070|PSB4_HUMAN Proteasome subunit beta type-4 OS=Homo sapiens GN=PSMB4 PE=1 SV=4	G.HSYSPRAI.H	FALSE	8	P28070	PSMB4	class I	AML14_DCB
1297		>sp|P28070|PSB4_HUMAN Proteasome subunit beta type-4 OS=Homo sapiens GN=PSMB4 PE=1 SV=4	G.HSYSPRAI.H	FALSE	8	P28070	PSMB4	class I	AML14_DCB
1298		>sp|Q8TEM1|PO210_HUMAN Nuclear pore membrane glycoprotein 210 OS=Homo sapiens GN=NUP210 PE=1 SV=3	G.RLYEITIEV.F	FALSE	9	Q8TEM1	NUP210	class I	AML14_DCB
1299		>sp|Q8TEM1|PO210_HUMAN Nuclear pore membrane glycoprotein 210 OS=Homo sapiens GN=NUP210 PE=1 SV=3	G.RLYEITIEV.F	FALSE	9	Q8TEM1	NUP210	class I	AML14_DCB
1300		>sp|Q8TEM1|PO210_HUMAN Nuclear pore membrane glycoprotein 210 OS=Homo sapiens GN=NUP210 PE=1 SV=3	T.AIDAALTSV.V	FALSE	9	Q8TEM1	NUP210	class I	AML14_DCB
1301		>sp|Q8TEM1|PO210_HUMAN Nuclear pore membrane glycoprotein 210 OS=Homo sapiens GN=NUP210 PE=1 SV=3	G.AYQYTIRAH.G	FALSE	9	Q8TEM1	NUP210	class I	AML14_DCB
1302		>sp|Q8TEM1|PO210_HUMAN Nuclear pore membrane glycoprotein 210 OS=Homo sapiens GN=NUP210 PE=1 SV=3	G.AYQYTIRAH.G	FALSE	9	Q8TEM1	NUP210	class I	AML14_DCB
1303		>sp|Q8TEM1|PO210_HUMAN Nuclear pore membrane glycoprotein 210 OS=Homo sapiens GN=NUP210 PE=1 SV=3	V.AYQEARGVAM.V	FALSE	10	Q8TEM1	NUP210	class I	AML14_DCB
1304		>sp|Q8TEM1|PO210_HUMAN Nuclear pore membrane glycoprotein 210 OS=Homo sapiens GN=NUP210 PE=1 SV=3	Q.MPIYVTGI.T	FALSE	8	Q8TEM1	NUP210	class I	AML14_DCB
1305		>sp|Q8TEM1|PO210_HUMAN Nuclear pore membrane glycoprotein 210 OS=Homo sapiens GN=NUP210 PE=1 SV=3	Q.MPIYVTGI.T	FALSE	8	Q8TEM1	NUP210	class I	AML14_DCB
1306		>sp|P19338|NUCL_HUMAN Nucleolin OS=Homo sapiens GN=NCL PE=1 SV=3	M.VKLAKAGKNQGD.P	FALSE	12	P19338	NCL	class I	AML14_DCB
1307		>sp|P19338|NUCL_HUMAN Nucleolin OS=Homo sapiens GN=NCL PE=1 SV=3	L.KVFGNEIKL.E	FALSE	9	P19338	NCL	class I	AML14_DCB
1308		>sp|P19338|NUCL_HUMAN Nucleolin OS=Homo sapiens GN=NCL PE=1 SV=3	E.DAAEIRLV.S	FALSE	8	P19338	NCL	class I	AML14_DCB
1309		>sp|P19338|NUCL_HUMAN Nucleolin OS=Homo sapiens GN=NCL PE=1 SV=3	E.DAAEIRLV.S	FALSE	8	P19338	NCL	class I	AML14_DCB
1310		>sp|P19338|NUCL_HUMAN Nucleolin OS=Homo sapiens GN=NCL PE=1 SV=3	E.DAAEIRLV.S	FALSE	8	P19338	NCL	class I	AML14_DCB
1311		>sp|P19338|NUCL_HUMAN Nucleolin OS=Homo sapiens GN=NCL PE=1 SV=3	K.GLSEDTTEETLK.E	FALSE	12	P19338	NCL	class I	AML14_DCB
1312		>sp|P19338|NUCL_HUMAN Nucleolin OS=Homo sapiens GN=NCL PE=1 SV=3	D.GEIDGNKVTLDW.A	FALSE	12	P19338	NCL	class I	AML14_DCB
1313		>sp|O15372|EIF3H_HUMAN Eukaryotic translation initiation factor 3 subunit H OS=Homo sapiens GN=EIF3H PE=1 SV=1	I.DGLVVLKI.I	FALSE	8	O15372	EIF3H	class I	AML14_DCB
1314		>sp|O15372|EIF3H_HUMAN Eukaryotic translation initiation factor 3 subunit H OS=Homo sapiens GN=EIF3H PE=1 SV=1	I.DGLVVLKI.I	FALSE	8	O15372	EIF3H	class I	AML14_DCB
1315		>sp|O15372|EIF3H_HUMAN Eukaryotic translation initiation factor 3 subunit H OS=Homo sapiens GN=EIF3H PE=1 SV=1	Y.RLTPKLMEV.C	FALSE	9	O15372	EIF3H	class I	AML14_DCB
1316		>sp|O15372|EIF3H_HUMAN Eukaryotic translation initiation factor 3 subunit H OS=Homo sapiens GN=EIF3H PE=1 SV=1	Y.RLTPKLMEV.C	FALSE	9	O15372	EIF3H	class I	AML14_DCB
1317	M[+16]	>sp|O15372|EIF3H_HUMAN Eukaryotic translation initiation factor 3 subunit H OS=Homo sapiens GN=EIF3H PE=1 SV=1	Y.RLTPKLM[+15.995]EV.C	FALSE	9	O15372	EIF3H	class I	AML14_DCB
1318	M[+16]	>sp|O15372|EIF3H_HUMAN Eukaryotic translation initiation factor 3 subunit H OS=Homo sapiens GN=EIF3H PE=1 SV=1	Y.RLTPKLM[+15.995]EV.C	FALSE	9	O15372	EIF3H	class I	AML14_DCB
1319		>sp|O15372|EIF3H_HUMAN Eukaryotic translation initiation factor 3 subunit H OS=Homo sapiens GN=EIF3H PE=1 SV=1	A.VADKHELL.S	FALSE	8	O15372	EIF3H	class I	AML14_DCB
1320		>sp|O15372|EIF3H_HUMAN Eukaryotic translation initiation factor 3 subunit H OS=Homo sapiens GN=EIF3H PE=1 SV=1	A.VADKHELL.S	FALSE	8	O15372	EIF3H	class I	AML14_DCB
1321		>sp|O15372|EIF3H_HUMAN Eukaryotic translation initiation factor 3 subunit H OS=Homo sapiens GN=EIF3H PE=1 SV=1	Q.LLMDRVDEM.S	FALSE	9	O15372	EIF3H	class I	AML14_DCB
1322		>sp|Q14152|EIF3A_HUMAN Eukaryotic translation initiation factor 3 subunit A OS=Homo sapiens GN=EIF3A PE=1 SV=1	E.RLYHDIAQQAF.K	FALSE	11	Q14152	EIF3A	class I	AML14_DCB
1323		>sp|Q14152|EIF3A_HUMAN Eukaryotic translation initiation factor 3 subunit A OS=Homo sapiens GN=EIF3A PE=1 SV=1	E.RLYHDIAQQAF.K	FALSE	11	Q14152	EIF3A	class I	AML14_DCB
1324		>sp|Q14152|EIF3A_HUMAN Eukaryotic translation initiation factor 3 subunit A OS=Homo sapiens GN=EIF3A PE=1 SV=1	V.DAFQLERAI.V	FALSE	9	Q14152	EIF3A	class I	AML14_DCB
1325		>sp|Q14152|EIF3A_HUMAN Eukaryotic translation initiation factor 3 subunit A OS=Homo sapiens GN=EIF3A PE=1 SV=1	E.DAPIGPHL.Q	FALSE	8	Q14152	EIF3A	class I	AML14_DCB
1326		>sp|Q14152|EIF3A_HUMAN Eukaryotic translation initiation factor 3 subunit A OS=Homo sapiens GN=EIF3A PE=1 SV=1	E.DAPIGPHL.Q	FALSE	8	Q14152	EIF3A	class I	AML14_DCB
1327		>sp|Q14152|EIF3A_HUMAN Eukaryotic translation initiation factor 3 subunit A OS=Homo sapiens GN=EIF3A PE=1 SV=1	L.EEIPLIKSAY.E	FALSE	10	Q14152	EIF3A	class I	AML14_DCB
1328		>sp|Q14152|EIF3A_HUMAN Eukaryotic translation initiation factor 3 subunit A OS=Homo sapiens GN=EIF3A PE=1 SV=1	R.SEREEVSSW.R	FALSE	9	Q14152	EIF3A	class I	AML14_DCB
1329		>sp|Q14152|EIF3A_HUMAN Eukaryotic translation initiation factor 3 subunit A OS=Homo sapiens GN=EIF3A PE=1 SV=1	E.REGEKEKASW.R	FALSE	10	Q14152	EIF3A	class I	AML14_DCB
1330		>sp|Q68CL5|TPGS2_HUMAN Tubulin polyglutamylase complex subunit 2 OS=Homo sapiens GN=TPGS2 PE=2 SV=2	T.RILESSPGV.T	FALSE	9	Q68CL5	TPGS2	class I	AML14_DCB
1331		>sp|Q68CL5|TPGS2_HUMAN Tubulin polyglutamylase complex subunit 2 OS=Homo sapiens GN=TPGS2 PE=2 SV=2	T.RILESSPGV.T	FALSE	9	Q68CL5	TPGS2	class I	AML14_DCB
1332		>sp|Q68CL5|TPGS2_HUMAN Tubulin polyglutamylase complex subunit 2 OS=Homo sapiens GN=TPGS2 PE=2 SV=2	L.MTNGFHMTW.S	FALSE	9	Q68CL5	TPGS2	class I	AML14_DCB
1333		>sp|Q68CL5|TPGS2_HUMAN Tubulin polyglutamylase complex subunit 2 OS=Homo sapiens GN=TPGS2 PE=2 SV=2	L.MTNGFHMTW.S	FALSE	9	Q68CL5	TPGS2	class I	AML14_DCB
1334		>sp|Q68CL5|TPGS2_HUMAN Tubulin polyglutamylase complex subunit 2 OS=Homo sapiens GN=TPGS2 PE=2 SV=2	L.MTNGFHMTW.S	FALSE	9	Q68CL5	TPGS2	class I	AML14_DCB
1335	M[+16]	>sp|Q68CL5|TPGS2_HUMAN Tubulin polyglutamylase complex subunit 2 OS=Homo sapiens GN=TPGS2 PE=2 SV=2	L.MTNGFHM[+15.995]TW.S	FALSE	9	Q68CL5	TPGS2	class I	AML14_DCB
1336	M[+16]	>sp|Q68CL5|TPGS2_HUMAN Tubulin polyglutamylase complex subunit 2 OS=Homo sapiens GN=TPGS2 PE=2 SV=2	L.MTNGFHM[+15.995]TW.S	FALSE	9	Q68CL5	TPGS2	class I	AML14_DCB
1337	M[+16]	>sp|Q68CL5|TPGS2_HUMAN Tubulin polyglutamylase complex subunit 2 OS=Homo sapiens GN=TPGS2 PE=2 SV=2	L.MTNGFHM[+15.995]TW.S	FALSE	9	Q68CL5	TPGS2	class I	AML14_DCB
1338	M[+16]	>sp|Q68CL5|TPGS2_HUMAN Tubulin polyglutamylase complex subunit 2 OS=Homo sapiens GN=TPGS2 PE=2 SV=2	L.M[+15.995]TNGFHMTW.S	FALSE	9	Q68CL5	TPGS2	class I	AML14_DCB
1339	M[+16]	>sp|Q68CL5|TPGS2_HUMAN Tubulin polyglutamylase complex subunit 2 OS=Homo sapiens GN=TPGS2 PE=2 SV=2	L.M[+15.995]TNGFHMTW.S	FALSE	9	Q68CL5	TPGS2	class I	AML14_DCB
1340	M[+16]*2	>sp|Q68CL5|TPGS2_HUMAN Tubulin polyglutamylase complex subunit 2 OS=Homo sapiens GN=TPGS2 PE=2 SV=2	L.M[+15.995]TNGFHM[+15.995]TW.S	FALSE	9	Q68CL5	TPGS2	class I	AML14_DCB
1341	M[+16]*2	>sp|Q68CL5|TPGS2_HUMAN Tubulin polyglutamylase complex subunit 2 OS=Homo sapiens GN=TPGS2 PE=2 SV=2	L.M[+15.995]TNGFHM[+15.995]TW.S	FALSE	9	Q68CL5	TPGS2	class I	AML14_DCB
1342	M[+16]*2	>sp|Q68CL5|TPGS2_HUMAN Tubulin polyglutamylase complex subunit 2 OS=Homo sapiens GN=TPGS2 PE=2 SV=2	L.M[+15.995]TNGFHM[+15.995]TW.S	FALSE	9	Q68CL5	TPGS2	class I	AML14_DCB
1343	M[+16]*2	>sp|Q68CL5|TPGS2_HUMAN Tubulin polyglutamylase complex subunit 2 OS=Homo sapiens GN=TPGS2 PE=2 SV=2	L.M[+15.995]TNGFHM[+15.995]TW.S	FALSE	9	Q68CL5	TPGS2	class I	AML14_DCB
1344		>sp|Q9UPN3|MACF1_HUMAN Microtubule-actin cross-linking factor 1, isoforms 1/2/3/5 OS=Homo sapiens GN=MACF1 PE=1 SV=4	K.ATHSSSTSW.F	FALSE	9	Q9UPN3	MACF1	class I	AML14_DCB
1345		>sp|Q9UPN3|MACF1_HUMAN Microtubule-actin cross-linking factor 1, isoforms 1/2/3/5 OS=Homo sapiens GN=MACF1 PE=1 SV=4	K.ATHSSSTSW.F	FALSE	9	Q9UPN3	MACF1	class I	AML14_DCB
1346		>sp|Q9UPN3|MACF1_HUMAN Microtubule-actin cross-linking factor 1, isoforms 1/2/3/5 OS=Homo sapiens GN=MACF1 PE=1 SV=4	E.GLIDRQVTV.R	FALSE	9	Q9UPN3	MACF1	class I	AML14_DCB
1347		>sp|Q9UPN3|MACF1_HUMAN Microtubule-actin cross-linking factor 1, isoforms 1/2/3/5 OS=Homo sapiens GN=MACF1 PE=1 SV=4	E.GLIDRQVTV.R	FALSE	9	Q9UPN3	MACF1	class I	AML14_DCB
1348		>sp|Q9UPN3|MACF1_HUMAN Microtubule-actin cross-linking factor 1, isoforms 1/2/3/5 OS=Homo sapiens GN=MACF1 PE=1 SV=4	A.FLDQHGHNL.T	FALSE	9	Q9UPN3	MACF1	class I	AML14_DCB
1349		>sp|Q9UPN3|MACF1_HUMAN Microtubule-actin cross-linking factor 1, isoforms 1/2/3/5 OS=Homo sapiens GN=MACF1 PE=1 SV=4	A.FLDQHGHNL.T	FALSE	9	Q9UPN3	MACF1	class I	AML14_DCB
1350		>sp|Q9UPN3|MACF1_HUMAN Microtubule-actin cross-linking factor 1, isoforms 1/2/3/5 OS=Homo sapiens GN=MACF1 PE=1 SV=4	A.FLDQHGHNL.T	FALSE	9	Q9UPN3	MACF1	class I	AML14_DCB
1351		>sp|Q9UPN3|MACF1_HUMAN Microtubule-actin cross-linking factor 1, isoforms 1/2/3/5 OS=Homo sapiens GN=MACF1 PE=1 SV=4	A.VLQGKLAEV.S	FALSE	9	Q9UPN3	MACF1	class I	AML14_DCB
1352		>sp|Q9UPN3|MACF1_HUMAN Microtubule-actin cross-linking factor 1, isoforms 1/2/3/5 OS=Homo sapiens GN=MACF1 PE=1 SV=4	A.VLQGKLAEV.S	FALSE	9	Q9UPN3	MACF1	class I	AML14_DCB
1353	.[+42]	>sp|P23528|COF1_HUMAN Cofilin-1 OS=Homo sapiens GN=CFL1 PE=1 SV=3	M.[+42.011]ASGVAVSDGVIK.V	FALSE	12	P23528	CFL1	class I	AML14_DCB
1354		>sp|P23528|COF1_HUMAN Cofilin-1 OS=Homo sapiens GN=CFL1 PE=1 SV=3	K.SSTPEEVKK.R	FALSE	9	P23528	CFL1	class I	AML14_DCB
1355		>sp|P23528|COF1_HUMAN Cofilin-1 OS=Homo sapiens GN=CFL1 PE=1 SV=3	Q.TVDDPYATF.V	FALSE	9	P23528	CFL1	class I	AML14_DCB
1356		>sp|P23528|COF1_HUMAN Cofilin-1 OS=Homo sapiens GN=CFL1 PE=1 SV=3	Q.TVDDPYATF.V	FALSE	9	P23528	CFL1	class I	AML14_DCB
1357		>sp|P23528|COF1_HUMAN Cofilin-1 OS=Homo sapiens GN=CFL1 PE=1 SV=3	D.DPYATFVKM.L	FALSE	9	P23528	CFL1	class I	AML14_DCB
1358		>sp|P23528|COF1_HUMAN Cofilin-1 OS=Homo sapiens GN=CFL1 PE=1 SV=3	D.DPYATFVKM.L	FALSE	9	P23528	CFL1	class I	AML14_DCB
1359		>sp|P23528|COF1_HUMAN Cofilin-1 OS=Homo sapiens GN=CFL1 PE=1 SV=3	Y.ALYDATYET.K	FALSE	9	P23528	CFL1	class I	AML14_DCB
1360		>sp|P23528|COF1_HUMAN Cofilin-1 OS=Homo sapiens GN=CFL1 PE=1 SV=3	Y.ALYDATYET.K	FALSE	9	P23528	CFL1	class I	AML14_DCB
1361		>sp|P22626|ROA2_HUMAN Heterogeneous nuclear ribonucleoproteins A2/B1 OS=Homo sapiens GN=HNRNPA2B1 PE=1 SV=2	E.SLRNYYEQW.G	FALSE	9	P22626	HNRNPA2B1	class I	AML14_DCB
1362		>sp|P22626|ROA2_HUMAN Heterogeneous nuclear ribonucleoproteins A2/B1 OS=Homo sapiens GN=HNRNPA2B1 PE=1 SV=2	S.SMAEVDAAM.A	FALSE	9	P22626	HNRNPA2B1	class I	AML14_DCB
1363	M[+16]	>sp|P22626|ROA2_HUMAN Heterogeneous nuclear ribonucleoproteins A2/B1 OS=Homo sapiens GN=HNRNPA2B1 PE=1 SV=2	A.AM[+15.995]AARPHSI.D	FALSE	9	P22626	HNRNPA2B1	class I	AML14_DCB
1364		>sp|P22626|ROA2_HUMAN Heterogeneous nuclear ribonucleoproteins A2/B1 OS=Homo sapiens GN=HNRNPA2B1 PE=1 SV=2	R.GGGGNFGPGPGSNFR.G	FALSE	15	P22626	HNRNPA2B1	class I	AML14_DCB
1365		>sp|P22626|ROA2_HUMAN Heterogeneous nuclear ribonucleoproteins A2/B1 OS=Homo sapiens GN=HNRNPA2B1 PE=1 SV=2	R.GGSDGYGSGR.G	FALSE	10	P22626	HNRNPA2B1	class I	AML14_DCB
1366		>sp|P22626|ROA2_HUMAN Heterogeneous nuclear ribonucleoproteins A2/B1 OS=Homo sapiens GN=HNRNPA2B1 PE=1 SV=2	R.GGSDGYGSGR.G	FALSE	10	P22626	HNRNPA2B1	class I	AML14_DCB
1367		>sp|P22626|ROA2_HUMAN Heterogeneous nuclear ribonucleoproteins A2/B1 OS=Homo sapiens GN=HNRNPA2B1 PE=1 SV=2	S.GNFGGSRNMGGP.Y	FALSE	12	P22626	HNRNPA2B1	class I	AML14_DCB
1368	.[+42]	>sp|P62826|RAN_HUMAN GTP-binding nuclear protein Ran OS=Homo sapiens GN=RAN PE=1 SV=3	M.[+42.011]AAQGEPQVQFK.L	FALSE	11	P62826	RAN	class I	AML14_DCB
1369		>sp|P62826|RAN_HUMAN GTP-binding nuclear protein Ran OS=Homo sapiens GN=RAN PE=1 SV=3	K.LVLVGDGGTGK.T	FALSE	11	P62826	RAN	class I	AML14_DCB
1370		>sp|P62826|RAN_HUMAN GTP-binding nuclear protein Ran OS=Homo sapiens GN=RAN PE=1 SV=3	K.NLQYYDISAK.S	FALSE	10	P62826	RAN	class I	AML14_DCB
1371		>sp|P62826|RAN_HUMAN GTP-binding nuclear protein Ran OS=Homo sapiens GN=RAN PE=1 SV=3	A.AQYEHDLEV.A	FALSE	9	P62826	RAN	class I	AML14_DCB
1372		>sp|P62826|RAN_HUMAN GTP-binding nuclear protein Ran OS=Homo sapiens GN=RAN PE=1 SV=3	A.AQYEHDLEV.A	FALSE	9	P62826	RAN	class I	AML14_DCB
1373		>sp|P62826|RAN_HUMAN GTP-binding nuclear protein Ran OS=Homo sapiens GN=RAN PE=1 SV=3	A.AQYEHDLEVA.Q	FALSE	10	P62826	RAN	class I	AML14_DCB
1374		>sp|P62826|RAN_HUMAN GTP-binding nuclear protein Ran OS=Homo sapiens GN=RAN PE=1 SV=3	A.AQYEHDLEVA.Q	FALSE	10	P62826	RAN	class I	AML14_DCB
1375		>sp|P07195|LDHB_HUMAN L-lactate dehydrogenase B chain OS=Homo sapiens GN=LDHB PE=1 SV=2	K.LIAPVAEEEATVPNNK.I	FALSE	16	P07195	LDHB	class I	AML14_DCB
1376		>sp|P07195|LDHB_HUMAN L-lactate dehydrogenase B chain OS=Homo sapiens GN=LDHB PE=1 SV=2	T.VPNNKITVV.G	FALSE	9	P07195	LDHB	class I	AML14_DCB
1377		>sp|P07195|LDHB_HUMAN L-lactate dehydrogenase B chain OS=Homo sapiens GN=LDHB PE=1 SV=2	T.VPNNKITVV.G	FALSE	9	P07195	LDHB	class I	AML14_DCB
1378		>sp|P07195|LDHB_HUMAN L-lactate dehydrogenase B chain OS=Homo sapiens GN=LDHB PE=1 SV=2	T.VPNNKITVV.G	FALSE	9	P07195	LDHB	class I	AML14_DCB
1379		>sp|P07195|LDHB_HUMAN L-lactate dehydrogenase B chain OS=Homo sapiens GN=LDHB PE=1 SV=2	K.DYSVTANSK.I	FALSE	9	P07195	LDHB	class I	AML14_DCB
1380		>sp|P07195|LDHB_HUMAN L-lactate dehydrogenase B chain OS=Homo sapiens GN=LDHB PE=1 SV=2	E.SAYEVIKL.K	FALSE	8	P07195	LDHB	class I	AML14_DCB
1381		>sp|P07195|LDHB_HUMAN L-lactate dehydrogenase B chain OS=Homo sapiens GN=LDHB PE=1 SV=2	K.LKDDEVAQLK.K	FALSE	10	P07195	LDHB	class I	AML14_DCB
1382		>sp|Q13464|ROCK1_HUMAN Rho-associated protein kinase 1 OS=Homo sapiens GN=ROCK1 PE=1 SV=1	D.RYLYMVMEY.M	FALSE	9	Q13464	ROCK1	class I	AML14_DCB
1383		>sp|Q13464|ROCK1_HUMAN Rho-associated protein kinase 1 OS=Homo sapiens GN=ROCK1 PE=1 SV=1	L.DAIHSMGFI.H	FALSE	9	Q13464	ROCK1	class I	AML14_DCB
1384		>sp|Q13464|ROCK1_HUMAN Rho-associated protein kinase 1 OS=Homo sapiens GN=ROCK1 PE=1 SV=1	A.FLTDREVRL.G	FALSE	9	Q13464	ROCK1	class I	AML14_DCB
1385		>sp|Q13464|ROCK1_HUMAN Rho-associated protein kinase 1 OS=Homo sapiens GN=ROCK1 PE=1 SV=1	A.FLTDREVRL.G	FALSE	9	Q13464	ROCK1	class I	AML14_DCB
1386		>sp|Q13464|ROCK1_HUMAN Rho-associated protein kinase 1 OS=Homo sapiens GN=ROCK1 PE=1 SV=1	A.FLTDREVRL.G	FALSE	9	Q13464	ROCK1	class I	AML14_DCB
1387		>sp|Q13464|ROCK1_HUMAN Rho-associated protein kinase 1 OS=Homo sapiens GN=ROCK1 PE=1 SV=1	K.RLLEFELAQL.T	FALSE	10	Q13464	ROCK1	class I	AML14_DCB
1388		>sp|Q13464|ROCK1_HUMAN Rho-associated protein kinase 1 OS=Homo sapiens GN=ROCK1 PE=1 SV=1	A.KLLDLSDSTSV.A	FALSE	11	Q13464	ROCK1	class I	AML14_DCB
1389		>sp|Q9UNM6|PSD13_HUMAN 26S proteasome non-ATPase regulatory subunit 13 OS=Homo sapiens GN=PSMD13 PE=1 SV=2	L.EELYTKKLW.H	FALSE	9	Q9UNM6	PSMD13	class I	AML14_DCB
1390		>sp|Q9UNM6|PSD13_HUMAN 26S proteasome non-ATPase regulatory subunit 13 OS=Homo sapiens GN=PSMD13 PE=1 SV=2	L.EELYTKKLW.H	FALSE	9	Q9UNM6	PSMD13	class I	AML14_DCB
1391		>sp|Q9UNM6|PSD13_HUMAN 26S proteasome non-ATPase regulatory subunit 13 OS=Homo sapiens GN=PSMD13 PE=1 SV=2	L.EELYTKKLW.H	FALSE	9	Q9UNM6	PSMD13	class I	AML14_DCB
1392		>sp|Q9UNM6|PSD13_HUMAN 26S proteasome non-ATPase regulatory subunit 13 OS=Homo sapiens GN=PSMD13 PE=1 SV=2	N.FISEFEHRV.N	FALSE	9	Q9UNM6	PSMD13	class I	AML14_DCB
1393		>sp|Q9UNM6|PSD13_HUMAN 26S proteasome non-ATPase regulatory subunit 13 OS=Homo sapiens GN=PSMD13 PE=1 SV=2	N.FISEFEHRV.N	FALSE	9	Q9UNM6	PSMD13	class I	AML14_DCB
1394		>sp|Q9UNM6|PSD13_HUMAN 26S proteasome non-ATPase regulatory subunit 13 OS=Homo sapiens GN=PSMD13 PE=1 SV=2	N.FISEFEHRV.N	FALSE	9	Q9UNM6	PSMD13	class I	AML14_DCB
1395		>sp|Q9UNM6|PSD13_HUMAN 26S proteasome non-ATPase regulatory subunit 13 OS=Homo sapiens GN=PSMD13 PE=1 SV=2	N.FISEFEHRV.N	FALSE	9	Q9UNM6	PSMD13	class I	AML14_DCB
1396		>sp|Q9UNM6|PSD13_HUMAN 26S proteasome non-ATPase regulatory subunit 13 OS=Homo sapiens GN=PSMD13 PE=1 SV=2	N.FISEFEHRV.N	FALSE	9	Q9UNM6	PSMD13	class I	AML14_DCB
1397		>sp|Q9UNM6|PSD13_HUMAN 26S proteasome non-ATPase regulatory subunit 13 OS=Homo sapiens GN=PSMD13 PE=1 SV=2	N.FISEFEHRV.N	FALSE	9	Q9UNM6	PSMD13	class I	AML14_DCB
1398		>sp|Q9UNM6|PSD13_HUMAN 26S proteasome non-ATPase regulatory subunit 13 OS=Homo sapiens GN=PSMD13 PE=1 SV=2	K.YYQTIGNHASY.Y	FALSE	11	Q9UNM6	PSMD13	class I	AML14_DCB
1399		>sp|Q9UNM6|PSD13_HUMAN 26S proteasome non-ATPase regulatory subunit 13 OS=Homo sapiens GN=PSMD13 PE=1 SV=2	A.SYYKDALRF.L	FALSE	9	Q9UNM6	PSMD13	class I	AML14_DCB
1400		>sp|Q9UNM6|PSD13_HUMAN 26S proteasome non-ATPase regulatory subunit 13 OS=Homo sapiens GN=PSMD13 PE=1 SV=2	A.SYYKDALRF.L	FALSE	9	Q9UNM6	PSMD13	class I	AML14_DCB
1401		>sp|P60174|TPIS_HUMAN Triosephosphate isomerase OS=Homo sapiens GN=TPI1 PE=1 SV=3	K.TATPQQAQEVHEK.L	FALSE	13	P60174	TPI1	class I	AML14_DCB
1402		>sp|P60174|TPIS_HUMAN Triosephosphate isomerase OS=Homo sapiens GN=TPI1 PE=1 SV=3	K.TATPQQAQEVHEK.L	FALSE	13	P60174	TPI1	class I	AML14_DCB
1403		>sp|P60174|TPIS_HUMAN Triosephosphate isomerase OS=Homo sapiens GN=TPI1 PE=1 SV=3	K.SNVSDAVAQSTR.I	FALSE	12	P60174	TPI1	class I	AML14_DCB
1404		>sp|P49321-3|NASP_HUMAN Isoform 3 of Nuclear autoantigenic sperm protein OS=Homo sapiens GN=NASP	F.QEAASLLGKKY.G	FALSE	11	P49321-3	NASP	class I	AML14_DCB
1405		>sp|P49321-3|NASP_HUMAN Isoform 3 of Nuclear autoantigenic sperm protein OS=Homo sapiens GN=NASP	R.QETKEAQLY.A	FALSE	9	P49321-3	NASP	class I	AML14_DCB
1406		>sp|P49321-3|NASP_HUMAN Isoform 3 of Nuclear autoantigenic sperm protein OS=Homo sapiens GN=NASP	R.QETKEAQLY.A	FALSE	9	P49321-3	NASP	class I	AML14_DCB
1407		>sp|P49321-3|NASP_HUMAN Isoform 3 of Nuclear autoantigenic sperm protein OS=Homo sapiens GN=NASP	R.LLAETHYQL.G	FALSE	9	P49321-3	NASP	class I	AML14_DCB
1408		>sp|P49321-3|NASP_HUMAN Isoform 3 of Nuclear autoantigenic sperm protein OS=Homo sapiens GN=NASP	T.HYQLGLAY.G	FALSE	8	P49321-3	NASP	class I	AML14_DCB
1409		>sp|P49321-3|NASP_HUMAN Isoform 3 of Nuclear autoantigenic sperm protein OS=Homo sapiens GN=NASP	N.RMAVLNEQV.K	FALSE	9	P49321-3	NASP	class I	AML14_DCB
1410		>sp|P49321-3|NASP_HUMAN Isoform 3 of Nuclear autoantigenic sperm protein OS=Homo sapiens GN=NASP	A.VLNEQVKEA.E	FALSE	9	P49321-3	NASP	class I	AML14_DCB
1411		>sp|P49321-3|NASP_HUMAN Isoform 3 of Nuclear autoantigenic sperm protein OS=Homo sapiens GN=NASP	A.VLNEQVKEA.E	FALSE	9	P49321-3	NASP	class I	AML14_DCB
1412		>sp|P14868|SYDC_HUMAN Aspartate--tRNA ligase, cytoplasmic OS=Homo sapiens GN=DARS PE=1 SV=2	A.AEDYAKERY.G	FALSE	9	P14868	DARS	class I	AML14_DCB
1413		>sp|P14868|SYDC_HUMAN Aspartate--tRNA ligase, cytoplasmic OS=Homo sapiens GN=DARS PE=1 SV=2	A.AEDYAKERY.G	FALSE	9	P14868	DARS	class I	AML14_DCB
1414		>sp|P14868|SYDC_HUMAN Aspartate--tRNA ligase, cytoplasmic OS=Homo sapiens GN=DARS PE=1 SV=2	F.RETLINKGF.V	FALSE	9	P14868	DARS	class I	AML14_DCB
1415		>sp|P14868|SYDC_HUMAN Aspartate--tRNA ligase, cytoplasmic OS=Homo sapiens GN=DARS PE=1 SV=2	F.NYHYHEVM.E	FALSE	8	P14868	DARS	class I	AML14_DCB
1416	M[+16]	>sp|P14868|SYDC_HUMAN Aspartate--tRNA ligase, cytoplasmic OS=Homo sapiens GN=DARS PE=1 SV=2	F.NYHYHEVM[+15.995].E	FALSE	8	P14868	DARS	class I	AML14_DCB
1417		>sp|P14868|SYDC_HUMAN Aspartate--tRNA ligase, cytoplasmic OS=Homo sapiens GN=DARS PE=1 SV=2	Q.TEIQTVNKQF.P	FALSE	10	P14868	DARS	class I	AML14_DCB
1418		>sp|P53396-2|ACLY_HUMAN Isoform 2 of ATP-citrate synthase OS=Homo sapiens GN=ACLY	V.DAKAQKLLV.G	FALSE	9	P53396-2	ACLY	class I	AML14_DCB
1419		>sp|P53396-2|ACLY_HUMAN Isoform 2 of ATP-citrate synthase OS=Homo sapiens GN=ACLY	V.DAKAQKLLV.G	FALSE	9	P53396-2	ACLY	class I	AML14_DCB
1420		>sp|P53396-2|ACLY_HUMAN Isoform 2 of ATP-citrate synthase OS=Homo sapiens GN=ACLY	V.YVLDLAAKV.D	FALSE	9	P53396-2	ACLY	class I	AML14_DCB
1421		>sp|P53396-2|ACLY_HUMAN Isoform 2 of ATP-citrate synthase OS=Homo sapiens GN=ACLY	A.DAMRKHPEV.D	FALSE	9	P53396-2	ACLY	class I	AML14_DCB
1422		>sp|P53396-2|ACLY_HUMAN Isoform 2 of ATP-citrate synthase OS=Homo sapiens GN=ACLY	K.LYRPGSVAY.V	FALSE	9	P53396-2	ACLY	class I	AML14_DCB
1423		>sp|P53396-2|ACLY_HUMAN Isoform 2 of ATP-citrate synthase OS=Homo sapiens GN=ACLY	K.LYRPGSVAY.V	FALSE	9	P53396-2	ACLY	class I	AML14_DCB
1424		>sp|P53396-2|ACLY_HUMAN Isoform 2 of ATP-citrate synthase OS=Homo sapiens GN=ACLY	S.TFMDHVLRY.Q	FALSE	9	P53396-2	ACLY	class I	AML14_DCB
1425		>sp|P78527|PRKDC_HUMAN DNA-dependent protein kinase catalytic subunit OS=Homo sapiens GN=PRKDC PE=1 SV=3	D.VFLPRVTEL.A	FALSE	9	P78527	PRKDC	class I	AML14_DCB
1426		>sp|P78527|PRKDC_HUMAN DNA-dependent protein kinase catalytic subunit OS=Homo sapiens GN=PRKDC PE=1 SV=3	D.VFLPRVTEL.A	FALSE	9	P78527	PRKDC	class I	AML14_DCB
1427		>sp|P78527|PRKDC_HUMAN DNA-dependent protein kinase catalytic subunit OS=Homo sapiens GN=PRKDC PE=1 SV=3	V.RIMEFTTTL.L	FALSE	9	P78527	PRKDC	class I	AML14_DCB
1428		>sp|P78527|PRKDC_HUMAN DNA-dependent protein kinase catalytic subunit OS=Homo sapiens GN=PRKDC PE=1 SV=3	V.RIMEFTTTL.L	FALSE	9	P78527	PRKDC	class I	AML14_DCB
1429		>sp|P78527|PRKDC_HUMAN DNA-dependent protein kinase catalytic subunit OS=Homo sapiens GN=PRKDC PE=1 SV=3	G.SFPEVFTTY.I	FALSE	9	P78527	PRKDC	class I	AML14_DCB
1430		>sp|P78527|PRKDC_HUMAN DNA-dependent protein kinase catalytic subunit OS=Homo sapiens GN=PRKDC PE=1 SV=3	G.SFPEVFTTY.I	FALSE	9	P78527	PRKDC	class I	AML14_DCB
1431		>sp|P78527|PRKDC_HUMAN DNA-dependent protein kinase catalytic subunit OS=Homo sapiens GN=PRKDC PE=1 SV=3	E.YFQALVNNM.S	FALSE	9	P78527	PRKDC	class I	AML14_DCB
1432		>sp|P78527|PRKDC_HUMAN DNA-dependent protein kinase catalytic subunit OS=Homo sapiens GN=PRKDC PE=1 SV=3	E.YFQALVNNM.S	FALSE	9	P78527	PRKDC	class I	AML14_DCB
1433		>sp|P78527|PRKDC_HUMAN DNA-dependent protein kinase catalytic subunit OS=Homo sapiens GN=PRKDC PE=1 SV=3	S.KTRDDWLVSW.V	FALSE	10	P78527	PRKDC	class I	AML14_DCB
1434		>sp|Q92499|DDX1_HUMAN ATP-dependent RNA helicase DDX1 OS=Homo sapiens GN=DDX1 PE=1 SV=2	F.LPNAPKALI.V	FALSE	9	Q92499	DDX1	class I	AML14_DCB
1435		>sp|Q92499|DDX1_HUMAN ATP-dependent RNA helicase DDX1 OS=Homo sapiens GN=DDX1 PE=1 SV=2	F.LPNAPKALI.V	FALSE	9	Q92499	DDX1	class I	AML14_DCB
1436		>sp|Q92499|DDX1_HUMAN ATP-dependent RNA helicase DDX1 OS=Homo sapiens GN=DDX1 PE=1 SV=2	L.AEQTLNNIKQF.K	FALSE	11	Q92499	DDX1	class I	AML14_DCB
1437		>sp|Q92499|DDX1_HUMAN ATP-dependent RNA helicase DDX1 OS=Homo sapiens GN=DDX1 PE=1 SV=2	K.KLSEKIMHF.P	FALSE	9	Q92499	DDX1	class I	AML14_DCB
1438		>sp|Q92499|DDX1_HUMAN ATP-dependent RNA helicase DDX1 OS=Homo sapiens GN=DDX1 PE=1 SV=2	G.VPYVINVTL.P	FALSE	9	Q92499	DDX1	class I	AML14_DCB
1439		>sp|Q92499|DDX1_HUMAN ATP-dependent RNA helicase DDX1 OS=Homo sapiens GN=DDX1 PE=1 SV=2	G.VPYVINVTL.P	FALSE	9	Q92499	DDX1	class I	AML14_DCB
1440		>sp|Q92499|DDX1_HUMAN ATP-dependent RNA helicase DDX1 OS=Homo sapiens GN=DDX1 PE=1 SV=2	D.ILAPTVQEL.A	FALSE	9	Q92499	DDX1	class I	AML14_DCB
1441		>sp|Q92499|DDX1_HUMAN ATP-dependent RNA helicase DDX1 OS=Homo sapiens GN=DDX1 PE=1 SV=2	D.ILAPTVQEL.A	FALSE	9	Q92499	DDX1	class I	AML14_DCB
1442		>sp|P25205|MCM3_HUMAN DNA replication licensing factor MCM3 OS=Homo sapiens GN=MCM3 PE=1 SV=3	G.IYQSKVREL.I	FALSE	9	P25205	MCM3	class I	AML14_DCB
1443		>sp|P25205|MCM3_HUMAN DNA replication licensing factor MCM3 OS=Homo sapiens GN=MCM3 PE=1 SV=3	G.IYQSKVREL.I	FALSE	9	P25205	MCM3	class I	AML14_DCB
1444		>sp|P25205|MCM3_HUMAN DNA replication licensing factor MCM3 OS=Homo sapiens GN=MCM3 PE=1 SV=3	G.IYQSKVREL.I	FALSE	9	P25205	MCM3	class I	AML14_DCB
1445		>sp|P25205|MCM3_HUMAN DNA replication licensing factor MCM3 OS=Homo sapiens GN=MCM3 PE=1 SV=3	G.IYQSKVREL.I	FALSE	9	P25205	MCM3	class I	AML14_DCB
1446		>sp|P25205|MCM3_HUMAN DNA replication licensing factor MCM3 OS=Homo sapiens GN=MCM3 PE=1 SV=3	I.YQSKVREL.I	FALSE	8	P25205	MCM3	class I	AML14_DCB
1447		>sp|P25205|MCM3_HUMAN DNA replication licensing factor MCM3 OS=Homo sapiens GN=MCM3 PE=1 SV=3	R.ALKDFVASI.D	FALSE	9	P25205	MCM3	class I	AML14_DCB
1448		>sp|P25205|MCM3_HUMAN DNA replication licensing factor MCM3 OS=Homo sapiens GN=MCM3 PE=1 SV=3	R.ALKDFVASI.D	FALSE	9	P25205	MCM3	class I	AML14_DCB
1449		>sp|P25205|MCM3_HUMAN DNA replication licensing factor MCM3 OS=Homo sapiens GN=MCM3 PE=1 SV=3	S.AEDIAKIKKF.S	FALSE	10	P25205	MCM3	class I	AML14_DCB
1450		>sp|Q9NU22|MDN1_HUMAN Midasin OS=Homo sapiens GN=MDN1 PE=1 SV=2	A.MLSEHTSKL.K	FALSE	9	Q9NU22	MDN1	class I	AML14_DCB
1451		>sp|Q9NU22|MDN1_HUMAN Midasin OS=Homo sapiens GN=MDN1 PE=1 SV=2	D.HEVTVEKKW.G	FALSE	9	Q9NU22	MDN1	class I	AML14_DCB
1452		>sp|Q9NU22|MDN1_HUMAN Midasin OS=Homo sapiens GN=MDN1 PE=1 SV=2	Q.RLNNKINSY.C	FALSE	9	Q9NU22	MDN1	class I	AML14_DCB
1453		>sp|Q9NU22|MDN1_HUMAN Midasin OS=Homo sapiens GN=MDN1 PE=1 SV=2	Q.RLNNKINSY.C	FALSE	9	Q9NU22	MDN1	class I	AML14_DCB
1454		>sp|Q9NU22|MDN1_HUMAN Midasin OS=Homo sapiens GN=MDN1 PE=1 SV=2	N.RMSMKTSSW.T	FALSE	9	Q9NU22	MDN1	class I	AML14_DCB
1455		>sp|Q9NU22|MDN1_HUMAN Midasin OS=Homo sapiens GN=MDN1 PE=1 SV=2	I.DGPRSAQV.A	FALSE	8	Q9NU22	MDN1	class I	AML14_DCB
1456		>sp|Q9NU22|MDN1_HUMAN Midasin OS=Homo sapiens GN=MDN1 PE=1 SV=2	S.SLGEFHVRL.Q	FALSE	9	Q9NU22	MDN1	class I	AML14_DCB
1457		>sp|Q9NU22|MDN1_HUMAN Midasin OS=Homo sapiens GN=MDN1 PE=1 SV=2	S.SLGEFHVRL.Q	FALSE	9	Q9NU22	MDN1	class I	AML14_DCB
1458		>sp|Q02880|TOP2B_HUMAN DNA topoisomerase 2-beta OS=Homo sapiens GN=TOP2B PE=1 SV=3	D.KLDETGVAL.K	FALSE	9	Q02880	TOP2B	class I	AML14_DCB
1459		>sp|Q02880|TOP2B_HUMAN DNA topoisomerase 2-beta OS=Homo sapiens GN=TOP2B PE=1 SV=3	R.RLHGLPEQFLY.G	FALSE	11	Q02880	TOP2B	class I	AML14_DCB
1460		>sp|Q02880|TOP2B_HUMAN DNA topoisomerase 2-beta OS=Homo sapiens GN=TOP2B PE=1 SV=3	S.AYHHGEQAL.M	FALSE	9	Q02880	TOP2B	class I	AML14_DCB
1461		>sp|Q02880|TOP2B_HUMAN DNA topoisomerase 2-beta OS=Homo sapiens GN=TOP2B PE=1 SV=3	Y.DAREIVNNV.R	FALSE	9	Q02880	TOP2B	class I	AML14_DCB
1462		>sp|Q02880|TOP2B_HUMAN DNA topoisomerase 2-beta OS=Homo sapiens GN=TOP2B PE=1 SV=3	Y.DAREIVNNV.R	FALSE	9	Q02880	TOP2B	class I	AML14_DCB
1463		>sp|Q02880|TOP2B_HUMAN DNA topoisomerase 2-beta OS=Homo sapiens GN=TOP2B PE=1 SV=3	Y.DAREIVNNV.R	FALSE	9	Q02880	TOP2B	class I	AML14_DCB
1464		>sp|Q02880|TOP2B_HUMAN DNA topoisomerase 2-beta OS=Homo sapiens GN=TOP2B PE=1 SV=3	Y.DAREIVNNV.R	FALSE	9	Q02880	TOP2B	class I	AML14_DCB
1465		>sp|Q02880|TOP2B_HUMAN DNA topoisomerase 2-beta OS=Homo sapiens GN=TOP2B PE=1 SV=3	H.KVFKLQTTL.T	FALSE	9	Q02880	TOP2B	class I	AML14_DCB
1466		>sp|P61221|ABCE1_HUMAN ATP-binding cassette sub-family E member 1 OS=Homo sapiens GN=ABCE1 PE=1 SV=1	R.DASLVFKV.A	FALSE	8	P61221	ABCE1	class I	AML14_DCB
1467		>sp|P61221|ABCE1_HUMAN ATP-binding cassette sub-family E member 1 OS=Homo sapiens GN=ABCE1 PE=1 SV=1	R.DASLVFKV.A	FALSE	8	P61221	ABCE1	class I	AML14_DCB
1468		>sp|P61221|ABCE1_HUMAN ATP-binding cassette sub-family E member 1 OS=Homo sapiens GN=ABCE1 PE=1 SV=1	R.DAYTHPQF.V	FALSE	8	P61221	ABCE1	class I	AML14_DCB
1469		>sp|P61221|ABCE1_HUMAN ATP-binding cassette sub-family E member 1 OS=Homo sapiens GN=ABCE1 PE=1 SV=1	R.DAYTHPQF.V	FALSE	8	P61221	ABCE1	class I	AML14_DCB
1470		>sp|P61221|ABCE1_HUMAN ATP-binding cassette sub-family E member 1 OS=Homo sapiens GN=ABCE1 PE=1 SV=1	R.DAYTHPQFV.T	FALSE	9	P61221	ABCE1	class I	AML14_DCB
1471		>sp|P61221|ABCE1_HUMAN ATP-binding cassette sub-family E member 1 OS=Homo sapiens GN=ABCE1 PE=1 SV=1	R.DAYTHPQFV.T	FALSE	9	P61221	ABCE1	class I	AML14_DCB
1472		>sp|P61221|ABCE1_HUMAN ATP-binding cassette sub-family E member 1 OS=Homo sapiens GN=ABCE1 PE=1 SV=1	R.DAYTHPQFV.T	FALSE	9	P61221	ABCE1	class I	AML14_DCB
1473		>sp|P61221|ABCE1_HUMAN ATP-binding cassette sub-family E member 1 OS=Homo sapiens GN=ABCE1 PE=1 SV=1	F.DGVPSKNTV.A	FALSE	9	P61221	ABCE1	class I	AML14_DCB
1474		>sp|P13612|ITA4_HUMAN Integrin alpha-4 OS=Homo sapiens GN=ITGA4 PE=1 SV=3	A.LLYQGPHNTL.F	FALSE	10	P13612	ITGA4	class I	AML14_DCB
1475		>sp|P13612|ITA4_HUMAN Integrin alpha-4 OS=Homo sapiens GN=ITGA4 PE=1 SV=3	L.GYSVGAGHF.R	FALSE	9	P13612	ITGA4	class I	AML14_DCB
1476		>sp|P13612|ITA4_HUMAN Integrin alpha-4 OS=Homo sapiens GN=ITGA4 PE=1 SV=3	G.RADGISSTF.S	FALSE	9	P13612	ITGA4	class I	AML14_DCB
1477		>sp|P13612|ITA4_HUMAN Integrin alpha-4 OS=Homo sapiens GN=ITGA4 PE=1 SV=3	G.RADGISSTF.S	FALSE	9	P13612	ITGA4	class I	AML14_DCB
1478		>sp|P13612|ITA4_HUMAN Integrin alpha-4 OS=Homo sapiens GN=ITGA4 PE=1 SV=3	D.DAYETTLHV.K	FALSE	9	P13612	ITGA4	class I	AML14_DCB
1479		>sp|P13612|ITA4_HUMAN Integrin alpha-4 OS=Homo sapiens GN=ITGA4 PE=1 SV=3	G.FPEPNPRVI.E	FALSE	9	P13612	ITGA4	class I	AML14_DCB
1480		>sp|P13612|ITA4_HUMAN Integrin alpha-4 OS=Homo sapiens GN=ITGA4 PE=1 SV=3	G.FPEPNPRVI.E	FALSE	9	P13612	ITGA4	class I	AML14_DCB
1481		>sp|Q14671|PUM1_HUMAN Pumilio homolog 1 OS=Homo sapiens GN=PUM1 PE=1 SV=3	S.VPLDPMEHV.G	FALSE	9	Q14671	PUM1	class I	AML14_DCB
1482	M[+16]	>sp|Q14671|PUM1_HUMAN Pumilio homolog 1 OS=Homo sapiens GN=PUM1 PE=1 SV=3	S.VPLDPM[+15.995]EHV.G	FALSE	9	Q14671	PUM1	class I	AML14_DCB
1483	M[+16]	>sp|Q14671|PUM1_HUMAN Pumilio homolog 1 OS=Homo sapiens GN=PUM1 PE=1 SV=3	S.VPLDPM[+15.995]EHV.G	FALSE	9	Q14671	PUM1	class I	AML14_DCB
1484		>sp|Q14671|PUM1_HUMAN Pumilio homolog 1 OS=Homo sapiens GN=PUM1 PE=1 SV=3	R.YPNLQLREI.A	FALSE	9	Q14671	PUM1	class I	AML14_DCB
1485		>sp|Q14671|PUM1_HUMAN Pumilio homolog 1 OS=Homo sapiens GN=PUM1 PE=1 SV=3	R.YPNLQLREI.A	FALSE	9	Q14671	PUM1	class I	AML14_DCB
1486		>sp|Q14671|PUM1_HUMAN Pumilio homolog 1 OS=Homo sapiens GN=PUM1 PE=1 SV=3	R.YPNLQLREI.A	FALSE	9	Q14671	PUM1	class I	AML14_DCB
1487		>sp|Q14671|PUM1_HUMAN Pumilio homolog 1 OS=Homo sapiens GN=PUM1 PE=1 SV=3	D.VAEPGQRKI.V	FALSE	9	Q14671	PUM1	class I	AML14_DCB
1488		>sp|Q14671|PUM1_HUMAN Pumilio homolog 1 OS=Homo sapiens GN=PUM1 PE=1 SV=3	D.VAEPGQRKI.V	FALSE	9	Q14671	PUM1	class I	AML14_DCB
1489		>sp|Q9UG63|ABCF2_HUMAN ATP-binding cassette sub-family F member 2 OS=Homo sapiens GN=ABCF2 PE=1 SV=2	E.KLMELYERL.E	FALSE	9	Q9UG63	ABCF2	class I	AML14_DCB
1490		>sp|Q9UG63|ABCF2_HUMAN ATP-binding cassette sub-family F member 2 OS=Homo sapiens GN=ABCF2 PE=1 SV=2	E.KLMELYERL.E	FALSE	9	Q9UG63	ABCF2	class I	AML14_DCB
1491		>sp|Q9UG63|ABCF2_HUMAN ATP-binding cassette sub-family F member 2 OS=Homo sapiens GN=ABCF2 PE=1 SV=2	E.KLMELYERL.E	FALSE	9	Q9UG63	ABCF2	class I	AML14_DCB
1492	M[+16]	>sp|Q9UG63|ABCF2_HUMAN ATP-binding cassette sub-family F member 2 OS=Homo sapiens GN=ABCF2 PE=1 SV=2	E.KLM[+15.995]ELYERL.E	FALSE	9	Q9UG63	ABCF2	class I	AML14_DCB
1493		>sp|Q9UG63|ABCF2_HUMAN ATP-binding cassette sub-family F member 2 OS=Homo sapiens GN=ABCF2 PE=1 SV=2	K.KLKDFSGGW.R	FALSE	9	Q9UG63	ABCF2	class I	AML14_DCB
1494		>sp|Q9UG63|ABCF2_HUMAN ATP-binding cassette sub-family F member 2 OS=Homo sapiens GN=ABCF2 PE=1 SV=2	K.KLKDFSGGW.R	FALSE	9	Q9UG63	ABCF2	class I	AML14_DCB
1495		>sp|Q9UG63|ABCF2_HUMAN ATP-binding cassette sub-family F member 2 OS=Homo sapiens GN=ABCF2 PE=1 SV=2	L.LLDEPTNHL.D	FALSE	9	Q9UG63	ABCF2	class I	AML14_DCB
1496		>sp|Q9UG63|ABCF2_HUMAN ATP-binding cassette sub-family F member 2 OS=Homo sapiens GN=ABCF2 PE=1 SV=2	L.FLDEPTNHL.D	FALSE	9	Q9UG63	ABCF2	class I	AML14_DCB
1497		>sp|Q9UG63|ABCF2_HUMAN ATP-binding cassette sub-family F member 2 OS=Homo sapiens GN=ABCF2 PE=1 SV=2	S.KLVDEEPQL.T	FALSE	9	Q9UG63	ABCF2	class I	AML14_DCB
1498		>sp|Q9UG63|ABCF2_HUMAN ATP-binding cassette sub-family F member 2 OS=Homo sapiens GN=ABCF2 PE=1 SV=2	S.KLVDEEPQL.T	FALSE	9	Q9UG63	ABCF2	class I	AML14_DCB
1499		>sp|Q99873|ANM1_HUMAN Protein arginine N-methyltransferase 1 OS=Homo sapiens GN=PRMT1 PE=1 SV=2	N.SMFHNRHLF.K	FALSE	9	Q99873	PRMT1	class I	AML14_DCB
1500		>sp|Q99873|ANM1_HUMAN Protein arginine N-methyltransferase 1 OS=Homo sapiens GN=PRMT1 PE=1 SV=2	N.SMFHNRHLF.K	FALSE	9	Q99873	PRMT1	class I	AML14_DCB
1501		>sp|Q99873|ANM1_HUMAN Protein arginine N-methyltransferase 1 OS=Homo sapiens GN=PRMT1 PE=1 SV=2	N.SMFHNRHLF.K	FALSE	9	Q99873	PRMT1	class I	AML14_DCB
1502		>sp|Q99873|ANM1_HUMAN Protein arginine N-methyltransferase 1 OS=Homo sapiens GN=PRMT1 PE=1 SV=2	R.HLFKDKVVL.D	FALSE	9	Q99873	PRMT1	class I	AML14_DCB
1503		>sp|Q99873|ANM1_HUMAN Protein arginine N-methyltransferase 1 OS=Homo sapiens GN=PRMT1 PE=1 SV=2	L.IFPDRATLY.V	FALSE	9	Q99873	PRMT1	class I	AML14_DCB
1504		>sp|Q99873|ANM1_HUMAN Protein arginine N-methyltransferase 1 OS=Homo sapiens GN=PRMT1 PE=1 SV=2	L.IFPDRATLY.V	FALSE	9	Q99873	PRMT1	class I	AML14_DCB
1505		>sp|Q99873|ANM1_HUMAN Protein arginine N-methyltransferase 1 OS=Homo sapiens GN=PRMT1 PE=1 SV=2	L.IFPDRATLY.V	FALSE	9	Q99873	PRMT1	class I	AML14_DCB
1506		>sp|Q99873|ANM1_HUMAN Protein arginine N-methyltransferase 1 OS=Homo sapiens GN=PRMT1 PE=1 SV=2	L.IFPDRATLY.V	FALSE	9	Q99873	PRMT1	class I	AML14_DCB
1507		>sp|Q99873|ANM1_HUMAN Protein arginine N-methyltransferase 1 OS=Homo sapiens GN=PRMT1 PE=1 SV=2	L.IFPDRATLY.V	FALSE	9	Q99873	PRMT1	class I	AML14_DCB
1508		>sp|Q99873|ANM1_HUMAN Protein arginine N-methyltransferase 1 OS=Homo sapiens GN=PRMT1 PE=1 SV=2	Y.KIHWWENVY.G	FALSE	9	Q99873	PRMT1	class I	AML14_DCB
1509		>sp|Q99873|ANM1_HUMAN Protein arginine N-methyltransferase 1 OS=Homo sapiens GN=PRMT1 PE=1 SV=2	Y.KIHWWENVY.G	FALSE	9	Q99873	PRMT1	class I	AML14_DCB
1510		>sp|Q99873|ANM1_HUMAN Protein arginine N-methyltransferase 1 OS=Homo sapiens GN=PRMT1 PE=1 SV=2	G.EEIFGTIGM.R	FALSE	9	Q99873	PRMT1	class I	AML14_DCB
1511		>sp|P02792|FRIL_HUMAN Ferritin light chain OS=Homo sapiens GN=FTL PE=1 SV=2	H.FLDEEVKLI.K	FALSE	9	P02792	FTL	class I	AML14_DCB
1512		>sp|P02792|FRIL_HUMAN Ferritin light chain OS=Homo sapiens GN=FTL PE=1 SV=2	D.EEVKLIKKM.G	FALSE	9	P02792	FTL	class I	AML14_DCB
1513		>sp|P02792|FRIL_HUMAN Ferritin light chain OS=Homo sapiens GN=FTL PE=1 SV=2	D.EEVKLIKKM.G	FALSE	9	P02792	FTL	class I	AML14_DCB
1514		>sp|P02792|FRIL_HUMAN Ferritin light chain OS=Homo sapiens GN=FTL PE=1 SV=2	D.EEVKLIKKM.G	FALSE	9	P02792	FTL	class I	AML14_DCB
1515	M[+16]	>sp|P02792|FRIL_HUMAN Ferritin light chain OS=Homo sapiens GN=FTL PE=1 SV=2	D.EEVKLIKKM[+15.995].G	FALSE	9	P02792	FTL	class I	AML14_DCB
1516	M[+16]	>sp|P02792|FRIL_HUMAN Ferritin light chain OS=Homo sapiens GN=FTL PE=1 SV=2	D.EEVKLIKKM[+15.995].G	FALSE	9	P02792	FTL	class I	AML14_DCB
1517		>sp|Q8WUM4-2|PDC6I_HUMAN Isoform 2 of Programmed cell death 6-interacting protein OS=Homo sapiens GN=PDCD6IP	G.SLFGGSVKL.A	FALSE	9	Q8WUM4-2	PDCD6IP	class I	AML14_DCB
1518		>sp|Q8WUM4-2|PDC6I_HUMAN Isoform 2 of Programmed cell death 6-interacting protein OS=Homo sapiens GN=PDCD6IP	G.SLFGGSVKL.A	FALSE	9	Q8WUM4-2	PDCD6IP	class I	AML14_DCB
1519		>sp|Q8WUM4-2|PDC6I_HUMAN Isoform 2 of Programmed cell death 6-interacting protein OS=Homo sapiens GN=PDCD6IP	L.DPIGKATLV.K	FALSE	9	Q8WUM4-2	PDCD6IP	class I	AML14_DCB
1520		>sp|Q8WUM4-2|PDC6I_HUMAN Isoform 2 of Programmed cell death 6-interacting protein OS=Homo sapiens GN=PDCD6IP	D.QLIKELPEL.L	FALSE	9	Q8WUM4-2	PDCD6IP	class I	AML14_DCB
1521		>sp|P00338|LDHA_HUMAN L-lactate dehydrogenase A chain OS=Homo sapiens GN=LDHA PE=1 SV=2	K.EEQTPQNKI.T	FALSE	9	P00338	LDHA	class I	AML14_DCB
1522		>sp|P00338|LDHA_HUMAN L-lactate dehydrogenase A chain OS=Homo sapiens GN=LDHA PE=1 SV=2	E.SIMKNLRRV.H	FALSE	9	P00338	LDHA	class I	AML14_DCB
1523		>sp|P00338|LDHA_HUMAN L-lactate dehydrogenase A chain OS=Homo sapiens GN=LDHA PE=1 SV=2	K.VTLTSEEEAR.L	FALSE	10	P00338	LDHA	class I	AML14_DCB
1524		>sp|P00338|LDHA_HUMAN L-lactate dehydrogenase A chain OS=Homo sapiens GN=LDHA PE=1 SV=2	D.TLWGIQKEL.Q	FALSE	9	P00338	LDHA	class I	AML14_DCB
1525		>sp|Q12789|TF3C1_HUMAN General transcription factor 3C polypeptide 1 OS=Homo sapiens GN=GTF3C1 PE=1 SV=4	A.EESDLSRQY.Q	FALSE	9	Q12789	GTF3C1	class I	AML14_DCB
1526		>sp|Q12789|TF3C1_HUMAN General transcription factor 3C polypeptide 1 OS=Homo sapiens GN=GTF3C1 PE=1 SV=4	L.RLIESLFTI.Q	FALSE	9	Q12789	GTF3C1	class I	AML14_DCB
1527		>sp|Q12789|TF3C1_HUMAN General transcription factor 3C polypeptide 1 OS=Homo sapiens GN=GTF3C1 PE=1 SV=4	L.RLIESLFTI.Q	FALSE	9	Q12789	GTF3C1	class I	AML14_DCB
1528		>sp|Q12789|TF3C1_HUMAN General transcription factor 3C polypeptide 1 OS=Homo sapiens GN=GTF3C1 PE=1 SV=4	E.SLDKTSHSV.G	FALSE	9	Q12789	GTF3C1	class I	AML14_DCB
1529		>sp|Q12789|TF3C1_HUMAN General transcription factor 3C polypeptide 1 OS=Homo sapiens GN=GTF3C1 PE=1 SV=4	C.TPVPARLR.P	FALSE	8	Q12789	GTF3C1	class I	AML14_DCB
1530		>sp|Q12789|TF3C1_HUMAN General transcription factor 3C polypeptide 1 OS=Homo sapiens GN=GTF3C1 PE=1 SV=4	G.RVFPHEVNW.N	FALSE	9	Q12789	GTF3C1	class I	AML14_DCB
1531		>sp|Q12789|TF3C1_HUMAN General transcription factor 3C polypeptide 1 OS=Homo sapiens GN=GTF3C1 PE=1 SV=4	G.RVFPHEVNW.N	FALSE	9	Q12789	GTF3C1	class I	AML14_DCB
1532		>sp|Q12789|TF3C1_HUMAN General transcription factor 3C polypeptide 1 OS=Homo sapiens GN=GTF3C1 PE=1 SV=4	G.RVFPHEVNW.N	FALSE	9	Q12789	GTF3C1	class I	AML14_DCB
1533		>sp|Q12789|TF3C1_HUMAN General transcription factor 3C polypeptide 1 OS=Homo sapiens GN=GTF3C1 PE=1 SV=4	G.RVFPHEVNW.N	FALSE	9	Q12789	GTF3C1	class I	AML14_DCB
1534		>sp|O60869|EDF1_HUMAN Endothelial differentiation-related factor 1 OS=Homo sapiens GN=EDF1 PE=1 SV=1	R.GEDVETSKKW.A	FALSE	10	O60869	EDF1	class I	AML14_DCB
1535		>sp|O60869|EDF1_HUMAN Endothelial differentiation-related factor 1 OS=Homo sapiens GN=EDF1 PE=1 SV=1	R.GEDVETSKKW.A	FALSE	10	O60869	EDF1	class I	AML14_DCB
1536		>sp|O60869|EDF1_HUMAN Endothelial differentiation-related factor 1 OS=Homo sapiens GN=EDF1 PE=1 SV=1	R.GEDVETSKKW.A	FALSE	10	O60869	EDF1	class I	AML14_DCB
1537		>sp|O60869|EDF1_HUMAN Endothelial differentiation-related factor 1 OS=Homo sapiens GN=EDF1 PE=1 SV=1	R.GEDVETSKKW.A	FALSE	10	O60869	EDF1	class I	AML14_DCB
1538		>sp|O60869|EDF1_HUMAN Endothelial differentiation-related factor 1 OS=Homo sapiens GN=EDF1 PE=1 SV=1	G.EDVETSKKW.A	FALSE	9	O60869	EDF1	class I	AML14_DCB
1539		>sp|O60869|EDF1_HUMAN Endothelial differentiation-related factor 1 OS=Homo sapiens GN=EDF1 PE=1 SV=1	E.DVETSKKW.A	FALSE	8	O60869	EDF1	class I	AML14_DCB
1540		>sp|Q15046|SYK_HUMAN Lysine--tRNA ligase OS=Homo sapiens GN=KARS PE=1 SV=3	N.GEDPYPHKF.H	FALSE	9	Q15046	KARS	class I	AML14_DCB
1541		>sp|Q15046|SYK_HUMAN Lysine--tRNA ligase OS=Homo sapiens GN=KARS PE=1 SV=3	N.GEDPYPHKF.H	FALSE	9	Q15046	KARS	class I	AML14_DCB
1542		>sp|Q15046|SYK_HUMAN Lysine--tRNA ligase OS=Homo sapiens GN=KARS PE=1 SV=3	D.HLTDITLKV.A	FALSE	9	Q15046	KARS	class I	AML14_DCB
1543		>sp|Q15046|SYK_HUMAN Lysine--tRNA ligase OS=Homo sapiens GN=KARS PE=1 SV=3	D.HLTDITLKV.A	FALSE	9	Q15046	KARS	class I	AML14_DCB
1544		>sp|Q15046|SYK_HUMAN Lysine--tRNA ligase OS=Homo sapiens GN=KARS PE=1 SV=3	D.KLVGEFLEV.T	FALSE	9	Q15046	KARS	class I	AML14_DCB
1545		>sp|Q9HCS7|SYF1_HUMAN Pre-mRNA-splicing factor SYF1 OS=Homo sapiens GN=XAB2 PE=1 SV=2	G.RVTHTRRTF.D	FALSE	9	Q9HCS7	XAB2	class I	AML14_DCB
1546		>sp|Q9HCS7|SYF1_HUMAN Pre-mRNA-splicing factor SYF1 OS=Homo sapiens GN=XAB2 PE=1 SV=2	D.RLDEAAQRL.A	FALSE	9	Q9HCS7	XAB2	class I	AML14_DCB
1547		>sp|Q9HCS7|SYF1_HUMAN Pre-mRNA-splicing factor SYF1 OS=Homo sapiens GN=XAB2 PE=1 SV=2	L.RQNPHHVHEW.H	FALSE	10	Q9HCS7	XAB2	class I	AML14_DCB
1548		>sp|Q9HCS7|SYF1_HUMAN Pre-mRNA-splicing factor SYF1 OS=Homo sapiens GN=XAB2 PE=1 SV=2	L.RQNPHHVHEW.H	FALSE	10	Q9HCS7	XAB2	class I	AML14_DCB
1549		>sp|Q9HCS7|SYF1_HUMAN Pre-mRNA-splicing factor SYF1 OS=Homo sapiens GN=XAB2 PE=1 SV=2	G.TFQSTKAVY.D	FALSE	9	Q9HCS7	XAB2	class I	AML14_DCB
1550		>sp|Q9HCS7|SYF1_HUMAN Pre-mRNA-splicing factor SYF1 OS=Homo sapiens GN=XAB2 PE=1 SV=2	G.TFQSTKAVY.D	FALSE	9	Q9HCS7	XAB2	class I	AML14_DCB
1551		>sp|Q9HCS7|SYF1_HUMAN Pre-mRNA-splicing factor SYF1 OS=Homo sapiens GN=XAB2 PE=1 SV=2	A.TYNTQVNFM.A	FALSE	9	Q9HCS7	XAB2	class I	AML14_DCB
1552	M[+16]	>sp|Q9HCS7|SYF1_HUMAN Pre-mRNA-splicing factor SYF1 OS=Homo sapiens GN=XAB2 PE=1 SV=2	A.TYNTQVNFM[+15.995].A	FALSE	9	Q9HCS7	XAB2	class I	AML14_DCB
1553		>sp|Q92597|NDRG1_HUMAN Protein NDRG1 OS=Homo sapiens GN=NDRG1 PE=1 SV=1	S.KLDPTKTTL.L	FALSE	9	Q92597	NDRG1	class I	AML14_DCB
1554		>sp|Q92597|NDRG1_HUMAN Protein NDRG1 OS=Homo sapiens GN=NDRG1 PE=1 SV=1	S.KLDPTKTTL.L	FALSE	9	Q92597	NDRG1	class I	AML14_DCB
1555		>sp|Q92597|NDRG1_HUMAN Protein NDRG1 OS=Homo sapiens GN=NDRG1 PE=1 SV=1	S.KLDPTKTTL.L	FALSE	9	Q92597	NDRG1	class I	AML14_DCB
1556		>sp|Q92597|NDRG1_HUMAN Protein NDRG1 OS=Homo sapiens GN=NDRG1 PE=1 SV=1	S.KLDPTKTTL.L	FALSE	9	Q92597	NDRG1	class I	AML14_DCB
1557		>sp|Q92597|NDRG1_HUMAN Protein NDRG1 OS=Homo sapiens GN=NDRG1 PE=1 SV=1	S.KLDPTKTTL.L	FALSE	9	Q92597	NDRG1	class I	AML14_DCB
1558		>sp|Q92597|NDRG1_HUMAN Protein NDRG1 OS=Homo sapiens GN=NDRG1 PE=1 SV=1	F.KYFVQGMGY.M	FALSE	9	Q92597	NDRG1	class I	AML14_DCB
1559		>sp|Q92597|NDRG1_HUMAN Protein NDRG1 OS=Homo sapiens GN=NDRG1 PE=1 SV=1	F.KYFVQGMGY.M	FALSE	9	Q92597	NDRG1	class I	AML14_DCB
1560		>sp|Q92597|NDRG1_HUMAN Protein NDRG1 OS=Homo sapiens GN=NDRG1 PE=1 SV=1	F.KYFVQGMGY.M	FALSE	9	Q92597	NDRG1	class I	AML14_DCB
1561	M[+16]	>sp|Q92597|NDRG1_HUMAN Protein NDRG1 OS=Homo sapiens GN=NDRG1 PE=1 SV=1	F.KYFVQGM[+15.995]GY.M	FALSE	9	Q92597	NDRG1	class I	AML14_DCB
1562	M[+16]	>sp|Q92597|NDRG1_HUMAN Protein NDRG1 OS=Homo sapiens GN=NDRG1 PE=1 SV=1	F.KYFVQGM[+15.995]GY.M	FALSE	9	Q92597	NDRG1	class I	AML14_DCB
1563		>sp|P36578|RL4_HUMAN 60S ribosomal protein L4 OS=Homo sapiens GN=RPL4 PE=1 SV=5	G.RMFAPTKTW.R	FALSE	9	P36578	RPL4	class I	AML14_DCB
1564		>sp|P36578|RL4_HUMAN 60S ribosomal protein L4 OS=Homo sapiens GN=RPL4 PE=1 SV=5	G.RMFAPTKTW.R	FALSE	9	P36578	RPL4	class I	AML14_DCB
1565		>sp|P36578|RL4_HUMAN 60S ribosomal protein L4 OS=Homo sapiens GN=RPL4 PE=1 SV=5	G.RMFAPTKTW.R	FALSE	9	P36578	RPL4	class I	AML14_DCB
1566		>sp|P36578|RL4_HUMAN 60S ribosomal protein L4 OS=Homo sapiens GN=RPL4 PE=1 SV=5	G.RMFAPTKTW.R	FALSE	9	P36578	RPL4	class I	AML14_DCB
1567	M[+16]	>sp|P36578|RL4_HUMAN 60S ribosomal protein L4 OS=Homo sapiens GN=RPL4 PE=1 SV=5	G.RM[+15.995]FAPTKTW.R	FALSE	9	P36578	RPL4	class I	AML14_DCB
1568	M[+16]	>sp|P36578|RL4_HUMAN 60S ribosomal protein L4 OS=Homo sapiens GN=RPL4 PE=1 SV=5	G.RM[+15.995]FAPTKTW.R	FALSE	9	P36578	RPL4	class I	AML14_DCB
1569	M[+16]	>sp|P36578|RL4_HUMAN 60S ribosomal protein L4 OS=Homo sapiens GN=RPL4 PE=1 SV=5	G.RM[+15.995]FAPTKTW.R	FALSE	9	P36578	RPL4	class I	AML14_DCB
1570		>sp|P36578|RL4_HUMAN 60S ribosomal protein L4 OS=Homo sapiens GN=RPL4 PE=1 SV=5	Y.NEDNGIIKAF.R	FALSE	10	P36578	RPL4	class I	AML14_DCB
1571		>sp|P36578|RL4_HUMAN 60S ribosomal protein L4 OS=Homo sapiens GN=RPL4 PE=1 SV=5	Y.NEDNGIIKAF.R	FALSE	10	P36578	RPL4	class I	AML14_DCB
1572		>sp|P36578|RL4_HUMAN 60S ribosomal protein L4 OS=Homo sapiens GN=RPL4 PE=1 SV=5	Y.NEDNGIIKAF.R	FALSE	10	P36578	RPL4	class I	AML14_DCB
1573		>sp|P36578|RL4_HUMAN 60S ribosomal protein L4 OS=Homo sapiens GN=RPL4 PE=1 SV=5	N.EDNGIIKAF.R	FALSE	9	P36578	RPL4	class I	AML14_DCB
1574		>sp|P36578|RL4_HUMAN 60S ribosomal protein L4 OS=Homo sapiens GN=RPL4 PE=1 SV=5	N.EDNGIIKAF.R	FALSE	9	P36578	RPL4	class I	AML14_DCB
1575		>sp|P11021|GRP78_HUMAN 78 kDa glucose-regulated protein OS=Homo sapiens GN=HSPA5 PE=1 SV=2	K.NQLTSNPENTVFDAK.R	FALSE	15	P11021	HSPA5	class I	AML14_DCB
1576		>sp|P11021|GRP78_HUMAN 78 kDa glucose-regulated protein OS=Homo sapiens GN=HSPA5 PE=1 SV=2	A.EAYLGKKV.T	FALSE	8	P11021	HSPA5	class I	AML14_DCB
1577		>sp|P11021|GRP78_HUMAN 78 kDa glucose-regulated protein OS=Homo sapiens GN=HSPA5 PE=1 SV=2	A.EAYLGKKV.T	FALSE	8	P11021	HSPA5	class I	AML14_DCB
1578		>sp|P11021|GRP78_HUMAN 78 kDa glucose-regulated protein OS=Homo sapiens GN=HSPA5 PE=1 SV=2	K.RALSSQHQAR.I	FALSE	10	P11021	HSPA5	class I	AML14_DCB
1579		>sp|P11021|GRP78_HUMAN 78 kDa glucose-regulated protein OS=Homo sapiens GN=HSPA5 PE=1 SV=2	K.VYEGERPLTK.D	FALSE	10	P11021	HSPA5	class I	AML14_DCB
1580		>sp|P11021|GRP78_HUMAN 78 kDa glucose-regulated protein OS=Homo sapiens GN=HSPA5 PE=1 SV=2	K.ITITNDQNR.L	FALSE	9	P11021	HSPA5	class I	AML14_DCB
1581		>sp|Q08J23|NSUN2_HUMAN tRNA (cytosine(34)-C(5))-methyltransferase OS=Homo sapiens GN=NSUN2 PE=1 SV=2	F.RLAQEGIYTL.Y	FALSE	10	Q08J23	NSUN2	class I	AML14_DCB
1582		>sp|Q08J23|NSUN2_HUMAN tRNA (cytosine(34)-C(5))-methyltransferase OS=Homo sapiens GN=NSUN2 PE=1 SV=2	F.RLAQEGIYTL.Y	FALSE	10	Q08J23	NSUN2	class I	AML14_DCB
1583		>sp|Q08J23|NSUN2_HUMAN tRNA (cytosine(34)-C(5))-methyltransferase OS=Homo sapiens GN=NSUN2 PE=1 SV=2	F.RLAQEGIYTL.Y	FALSE	10	Q08J23	NSUN2	class I	AML14_DCB
1584		>sp|Q08J23|NSUN2_HUMAN tRNA (cytosine(34)-C(5))-methyltransferase OS=Homo sapiens GN=NSUN2 PE=1 SV=2	L.YPFINSRIITV.S	FALSE	11	Q08J23	NSUN2	class I	AML14_DCB
1585		>sp|Q08J23|NSUN2_HUMAN tRNA (cytosine(34)-C(5))-methyltransferase OS=Homo sapiens GN=NSUN2 PE=1 SV=2	L.YPFINSRIITV.S	FALSE	11	Q08J23	NSUN2	class I	AML14_DCB
1586		>sp|Q08J23|NSUN2_HUMAN tRNA (cytosine(34)-C(5))-methyltransferase OS=Homo sapiens GN=NSUN2 PE=1 SV=2	T.QENPFFRKL.S	FALSE	9	Q08J23	NSUN2	class I	AML14_DCB
1587		>sp|Q08J23|NSUN2_HUMAN tRNA (cytosine(34)-C(5))-methyltransferase OS=Homo sapiens GN=NSUN2 PE=1 SV=2	T.QENPFFRKL.S	FALSE	9	Q08J23	NSUN2	class I	AML14_DCB
1588		>sp|Q08J23|NSUN2_HUMAN tRNA (cytosine(34)-C(5))-methyltransferase OS=Homo sapiens GN=NSUN2 PE=1 SV=2	T.QENPFFRKL.S	FALSE	9	Q08J23	NSUN2	class I	AML14_DCB
1589		>sp|Q08J23|NSUN2_HUMAN tRNA (cytosine(34)-C(5))-methyltransferase OS=Homo sapiens GN=NSUN2 PE=1 SV=2	T.QENPFFRKL.S	FALSE	9	Q08J23	NSUN2	class I	AML14_DCB
1590		>sp|Q9HBM1|SPC25_HUMAN Kinetochore protein Spc25 OS=Homo sapiens GN=SPC25 PE=1 SV=1	C.QMAGLRDTY.K	FALSE	9	Q9HBM1	SPC25	class I	AML14_DCB
1591	M[+16]	>sp|Q9HBM1|SPC25_HUMAN Kinetochore protein Spc25 OS=Homo sapiens GN=SPC25 PE=1 SV=1	C.QM[+15.995]AGLRDTY.K	FALSE	9	Q9HBM1	SPC25	class I	AML14_DCB
1592		>sp|Q9HBM1|SPC25_HUMAN Kinetochore protein Spc25 OS=Homo sapiens GN=SPC25 PE=1 SV=1	D.NLLKLIAEV.K	FALSE	9	Q9HBM1	SPC25	class I	AML14_DCB
1593		>sp|Q9HBM1|SPC25_HUMAN Kinetochore protein Spc25 OS=Homo sapiens GN=SPC25 PE=1 SV=1	R.KIYGEKLQF.I	FALSE	9	Q9HBM1	SPC25	class I	AML14_DCB
1594		>sp|Q9HBM1|SPC25_HUMAN Kinetochore protein Spc25 OS=Homo sapiens GN=SPC25 PE=1 SV=1	R.KIYGEKLQF.I	FALSE	9	Q9HBM1	SPC25	class I	AML14_DCB
1595		>sp|O15294|OGT1_HUMAN UDP-N-acetylglucosamine--peptide N-acetylglucosaminyltransferase 110 kDa subunit OS=Homo sapiens GN=OGT PE=1 SV=3	A.DAHSNLASI.H	FALSE	9	O15294	OGT	class I	AML14_DCB
1596		>sp|O15294|OGT1_HUMAN UDP-N-acetylglucosamine--peptide N-acetylglucosaminyltransferase 110 kDa subunit OS=Homo sapiens GN=OGT PE=1 SV=3	A.DAHSNLASI.H	FALSE	9	O15294	OGT	class I	AML14_DCB
1597		>sp|O15294|OGT1_HUMAN UDP-N-acetylglucosamine--peptide N-acetylglucosaminyltransferase 110 kDa subunit OS=Homo sapiens GN=OGT PE=1 SV=3	A.DAHSNLASI.H	FALSE	9	O15294	OGT	class I	AML14_DCB
1598		>sp|O15294|OGT1_HUMAN UDP-N-acetylglucosamine--peptide N-acetylglucosaminyltransferase 110 kDa subunit OS=Homo sapiens GN=OGT PE=1 SV=3	A.DAHSNLASI.H	FALSE	9	O15294	OGT	class I	AML14_DCB
1599		>sp|O15294|OGT1_HUMAN UDP-N-acetylglucosamine--peptide N-acetylglucosaminyltransferase 110 kDa subunit OS=Homo sapiens GN=OGT PE=1 SV=3	A.DAHSNLASI.H	FALSE	9	O15294	OGT	class I	AML14_DCB
1600		>sp|O15294|OGT1_HUMAN UDP-N-acetylglucosamine--peptide N-acetylglucosaminyltransferase 110 kDa subunit OS=Homo sapiens GN=OGT PE=1 SV=3	E.KLAYMPHTF.F	FALSE	9	O15294	OGT	class I	AML14_DCB
1601	M[+16]	>sp|O15294|OGT1_HUMAN UDP-N-acetylglucosamine--peptide N-acetylglucosaminyltransferase 110 kDa subunit OS=Homo sapiens GN=OGT PE=1 SV=3	E.KLAYM[+15.995]PHTF.F	FALSE	9	O15294	OGT	class I	AML14_DCB
1602		>sp|O15294|OGT1_HUMAN UDP-N-acetylglucosamine--peptide N-acetylglucosaminyltransferase 110 kDa subunit OS=Homo sapiens GN=OGT PE=1 SV=3	N.MPVIPMNTI.A	FALSE	9	O15294	OGT	class I	AML14_DCB
1603		>sp|P23921|RIR1_HUMAN Ribonucleoside-diphosphate reductase large subunit OS=Homo sapiens GN=RRM1 PE=1 SV=1	Q.GLYSGVTTV.E	FALSE	9	P23921	RRM1	class I	AML14_DCB
1604		>sp|P23921|RIR1_HUMAN Ribonucleoside-diphosphate reductase large subunit OS=Homo sapiens GN=RRM1 PE=1 SV=1	Q.GLYSGVTTV.E	FALSE	9	P23921	RRM1	class I	AML14_DCB
1605		>sp|P23921|RIR1_HUMAN Ribonucleoside-diphosphate reductase large subunit OS=Homo sapiens GN=RRM1 PE=1 SV=1	F.KTLERSYLL.K	FALSE	9	P23921	RRM1	class I	AML14_DCB
1606		>sp|P23921|RIR1_HUMAN Ribonucleoside-diphosphate reductase large subunit OS=Homo sapiens GN=RRM1 PE=1 SV=1	F.KTLERSYLL.K	FALSE	9	P23921	RRM1	class I	AML14_DCB
1607		>sp|P23921|RIR1_HUMAN Ribonucleoside-diphosphate reductase large subunit OS=Homo sapiens GN=RRM1 PE=1 SV=1	G.EEFEKLYASY.E	FALSE	10	P23921	RRM1	class I	AML14_DCB
1608		>sp|P23921|RIR1_HUMAN Ribonucleoside-diphosphate reductase large subunit OS=Homo sapiens GN=RRM1 PE=1 SV=1	G.AFIDQSQSL.N	FALSE	9	P23921	RRM1	class I	AML14_DCB
1609		>sp|P23921|RIR1_HUMAN Ribonucleoside-diphosphate reductase large subunit OS=Homo sapiens GN=RRM1 PE=1 SV=1	G.AFIDQSQSL.N	FALSE	9	P23921	RRM1	class I	AML14_DCB
1610		>sp|P23921|RIR1_HUMAN Ribonucleoside-diphosphate reductase large subunit OS=Homo sapiens GN=RRM1 PE=1 SV=1	G.AFIDQSQSL.N	FALSE	9	P23921	RRM1	class I	AML14_DCB
1611		>sp|P23921|RIR1_HUMAN Ribonucleoside-diphosphate reductase large subunit OS=Homo sapiens GN=RRM1 PE=1 SV=1	G.AFIDQSQSL.N	FALSE	9	P23921	RRM1	class I	AML14_DCB
1612		>sp|O43847|NRDC_HUMAN Nardilysin OS=Homo sapiens GN=NRDC PE=1 SV=2	Y.RVKPLHYISW.L	FALSE	10	O43847	NRDC	class I	AML14_DCB
1613		>sp|O43847|NRDC_HUMAN Nardilysin OS=Homo sapiens GN=NRDC PE=1 SV=2	Y.RVKPLHYISW.L	FALSE	10	O43847	NRDC	class I	AML14_DCB
1614		>sp|O43847|NRDC_HUMAN Nardilysin OS=Homo sapiens GN=NRDC PE=1 SV=2	Y.RVKPLHYISW.L	FALSE	10	O43847	NRDC	class I	AML14_DCB
1615		>sp|O43847|NRDC_HUMAN Nardilysin OS=Homo sapiens GN=NRDC PE=1 SV=2	V.YYQSGTRSL.R	FALSE	9	O43847	NRDC	class I	AML14_DCB
1616		>sp|O43847|NRDC_HUMAN Nardilysin OS=Homo sapiens GN=NRDC PE=1 SV=2	E.AFNTQVTAL.I	FALSE	9	O43847	NRDC	class I	AML14_DCB
1617		>sp|O43847|NRDC_HUMAN Nardilysin OS=Homo sapiens GN=NRDC PE=1 SV=2	E.AFNTQVTAL.I	FALSE	9	O43847	NRDC	class I	AML14_DCB
1618		>sp|O43847|NRDC_HUMAN Nardilysin OS=Homo sapiens GN=NRDC PE=1 SV=2	A.HEIEALKSF.S	FALSE	9	O43847	NRDC	class I	AML14_DCB
1619		>sp|O43847|NRDC_HUMAN Nardilysin OS=Homo sapiens GN=NRDC PE=1 SV=2	A.HEIEALKSF.S	FALSE	9	O43847	NRDC	class I	AML14_DCB
1620		>sp|P13498|CY24A_HUMAN Cytochrome b-245 light chain OS=Homo sapiens GN=CYBA PE=1 SV=3	G.AYSIVAGVF.V	FALSE	9	P13498	CYBA	class I	AML14_DCB
1621		>sp|P13498|CY24A_HUMAN Cytochrome b-245 light chain OS=Homo sapiens GN=CYBA PE=1 SV=3	V.KLFGPFTRNYY.V	FALSE	11	P13498	CYBA	class I	AML14_DCB
1622		>sp|P13498|CY24A_HUMAN Cytochrome b-245 light chain OS=Homo sapiens GN=CYBA PE=1 SV=3	V.KLFGPFTRNYY.V	FALSE	11	P13498	CYBA	class I	AML14_DCB
1623		>sp|P13498|CY24A_HUMAN Cytochrome b-245 light chain OS=Homo sapiens GN=CYBA PE=1 SV=3	V.KLFGPFTRNYY.V	FALSE	11	P13498	CYBA	class I	AML14_DCB
1624		>sp|P13498|CY24A_HUMAN Cytochrome b-245 light chain OS=Homo sapiens GN=CYBA PE=1 SV=3	V.KLFGPFTRNYY.V	FALSE	11	P13498	CYBA	class I	AML14_DCB
1625		>sp|P13498|CY24A_HUMAN Cytochrome b-245 light chain OS=Homo sapiens GN=CYBA PE=1 SV=3	V.KLFGPFTRNYY.V	FALSE	11	P13498	CYBA	class I	AML14_DCB
1626		>sp|P13498|CY24A_HUMAN Cytochrome b-245 light chain OS=Homo sapiens GN=CYBA PE=1 SV=3	V.KLFGPFTRNYY.V	FALSE	11	P13498	CYBA	class I	AML14_DCB
1627		>sp|P13498|CY24A_HUMAN Cytochrome b-245 light chain OS=Homo sapiens GN=CYBA PE=1 SV=3	R.NYYVRAVL.H	FALSE	8	P13498	CYBA	class I	AML14_DCB
1628		>sp|P13498|CY24A_HUMAN Cytochrome b-245 light chain OS=Homo sapiens GN=CYBA PE=1 SV=3	N.YYVRAVLHL.L	FALSE	9	P13498	CYBA	class I	AML14_DCB
1629		>sp|P13498|CY24A_HUMAN Cytochrome b-245 light chain OS=Homo sapiens GN=CYBA PE=1 SV=3	N.YYVRAVLHL.L	FALSE	9	P13498	CYBA	class I	AML14_DCB
1630		>sp|P13498|CY24A_HUMAN Cytochrome b-245 light chain OS=Homo sapiens GN=CYBA PE=1 SV=3	N.YYVRAVLHL.L	FALSE	9	P13498	CYBA	class I	AML14_DCB
1631		>sp|Q92608|DOCK2_HUMAN Dedicator of cytokinesis protein 2 OS=Homo sapiens GN=DOCK2 PE=1 SV=2	P.HLVDRTTVV.A	FALSE	9	Q92608	DOCK2	class I	AML14_DCB
1632		>sp|Q92608|DOCK2_HUMAN Dedicator of cytokinesis protein 2 OS=Homo sapiens GN=DOCK2 PE=1 SV=2	L.SYQDAAFTY.H	FALSE	9	Q92608	DOCK2	class I	AML14_DCB
1633		>sp|Q92608|DOCK2_HUMAN Dedicator of cytokinesis protein 2 OS=Homo sapiens GN=DOCK2 PE=1 SV=2	L.SYQDAAFTY.H	FALSE	9	Q92608	DOCK2	class I	AML14_DCB
1634		>sp|Q92608|DOCK2_HUMAN Dedicator of cytokinesis protein 2 OS=Homo sapiens GN=DOCK2 PE=1 SV=2	G.KMWEEAISL.C	FALSE	9	Q92608	DOCK2	class I	AML14_DCB
1635		>sp|Q92608|DOCK2_HUMAN Dedicator of cytokinesis protein 2 OS=Homo sapiens GN=DOCK2 PE=1 SV=2	G.KMWEEAISL.C	FALSE	9	Q92608	DOCK2	class I	AML14_DCB
1636		>sp|Q92608|DOCK2_HUMAN Dedicator of cytokinesis protein 2 OS=Homo sapiens GN=DOCK2 PE=1 SV=2	G.KMWEEAISL.C	FALSE	9	Q92608	DOCK2	class I	AML14_DCB
1637		>sp|Q92608|DOCK2_HUMAN Dedicator of cytokinesis protein 2 OS=Homo sapiens GN=DOCK2 PE=1 SV=2	Q.IPFLGAGIKI.H	FALSE	10	Q92608	DOCK2	class I	AML14_DCB
1638		>sp|P28340|DPOD1_HUMAN DNA polymerase delta catalytic subunit OS=Homo sapiens GN=POLD1 PE=1 SV=2	M.EEMEAEHRL.Q	FALSE	9	P28340	POLD1	class I	AML14_DCB
1639	M[+16]	>sp|P28340|DPOD1_HUMAN DNA polymerase delta catalytic subunit OS=Homo sapiens GN=POLD1 PE=1 SV=2	M.EEM[+15.995]EAEHRL.Q	FALSE	9	P28340	POLD1	class I	AML14_DCB
1640	M[+16]	>sp|P28340|DPOD1_HUMAN DNA polymerase delta catalytic subunit OS=Homo sapiens GN=POLD1 PE=1 SV=2	M.EEM[+15.995]EAEHRL.Q	FALSE	9	P28340	POLD1	class I	AML14_DCB
1641		>sp|P28340|DPOD1_HUMAN DNA polymerase delta catalytic subunit OS=Homo sapiens GN=POLD1 PE=1 SV=2	E.LYQKEVSHL.N	FALSE	9	P28340	POLD1	class I	AML14_DCB
1642		>sp|Q9Y679|AUP1_HUMAN Ancient ubiquitous protein 1 OS=Homo sapiens GN=AUP1 PE=1 SV=1	L.RLFLGIHVF.L	FALSE	9	Q9Y679	AUP1	class I	AML14_DCB
1643		>sp|Q9Y679|AUP1_HUMAN Ancient ubiquitous protein 1 OS=Homo sapiens GN=AUP1 PE=1 SV=1	A.TLAQRVKEV.L	FALSE	9	Q9Y679	AUP1	class I	AML14_DCB
1644		>sp|Q9Y679|AUP1_HUMAN Ancient ubiquitous protein 1 OS=Homo sapiens GN=AUP1 PE=1 SV=1	V.LPHVPLGVI.Q	FALSE	9	Q9Y679	AUP1	class I	AML14_DCB
1645		>sp|Q9Y679|AUP1_HUMAN Ancient ubiquitous protein 1 OS=Homo sapiens GN=AUP1 PE=1 SV=1	V.LPHVPLGVI.Q	FALSE	9	Q9Y679	AUP1	class I	AML14_DCB
1646		>sp|Q9Y679|AUP1_HUMAN Ancient ubiquitous protein 1 OS=Homo sapiens GN=AUP1 PE=1 SV=1	V.LPHVPLGVI.Q	FALSE	9	Q9Y679	AUP1	class I	AML14_DCB
1647		>sp|P17844|DDX5_HUMAN Probable ATP-dependent RNA helicase DDX5 OS=Homo sapiens GN=DDX5 PE=1 SV=1	N.FYQEHPDL.A	FALSE	8	P17844	DDX5	class I	AML14_DCB
1648		>sp|P17844|DDX5_HUMAN Probable ATP-dependent RNA helicase DDX5 OS=Homo sapiens GN=DDX5 PE=1 SV=1	N.FYQEHPDL.A	FALSE	8	P17844	DDX5	class I	AML14_DCB
1649		>sp|P17844|DDX5_HUMAN Probable ATP-dependent RNA helicase DDX5 OS=Homo sapiens GN=DDX5 PE=1 SV=1	N.FPANVMDVI.A	FALSE	9	P17844	DDX5	class I	AML14_DCB
1650	M[+16]	>sp|P17844|DDX5_HUMAN Probable ATP-dependent RNA helicase DDX5 OS=Homo sapiens GN=DDX5 PE=1 SV=1	N.FPANVM[+15.995]DVI.A	FALSE	9	P17844	DDX5	class I	AML14_DCB
1651	M[+16]	>sp|P17844|DDX5_HUMAN Probable ATP-dependent RNA helicase DDX5 OS=Homo sapiens GN=DDX5 PE=1 SV=1	N.FPANVM[+15.995]DVI.A	FALSE	9	P17844	DDX5	class I	AML14_DCB
1652	M[+16]	>sp|P17844|DDX5_HUMAN Probable ATP-dependent RNA helicase DDX5 OS=Homo sapiens GN=DDX5 PE=1 SV=1	N.FPANVM[+15.995]DVI.A	FALSE	9	P17844	DDX5	class I	AML14_DCB
1653		>sp|P17844|DDX5_HUMAN Probable ATP-dependent RNA helicase DDX5 OS=Homo sapiens GN=DDX5 PE=1 SV=1	S.YLLPAIVHI.N	FALSE	9	P17844	DDX5	class I	AML14_DCB
1654		>sp|P17844|DDX5_HUMAN Probable ATP-dependent RNA helicase DDX5 OS=Homo sapiens GN=DDX5 PE=1 SV=1	S.YLLPAIVHI.N	FALSE	9	P17844	DDX5	class I	AML14_DCB
1655		>sp|P17844|DDX5_HUMAN Probable ATP-dependent RNA helicase DDX5 OS=Homo sapiens GN=DDX5 PE=1 SV=1	S.YLLPAIVHI.N	FALSE	9	P17844	DDX5	class I	AML14_DCB
1656		>sp|P17844|DDX5_HUMAN Probable ATP-dependent RNA helicase DDX5 OS=Homo sapiens GN=DDX5 PE=1 SV=1	S.YLLPAIVHI.N	FALSE	9	P17844	DDX5	class I	AML14_DCB
1657		>sp|P17844|DDX5_HUMAN Probable ATP-dependent RNA helicase DDX5 OS=Homo sapiens GN=DDX5 PE=1 SV=1	S.YLLPAIVHI.N	FALSE	9	P17844	DDX5	class I	AML14_DCB
1658		>sp|P17844|DDX5_HUMAN Probable ATP-dependent RNA helicase DDX5 OS=Homo sapiens GN=DDX5 PE=1 SV=1	R.DGWPAMGI.H	FALSE	8	P17844	DDX5	class I	AML14_DCB
1659		>sp|P17844|DDX5_HUMAN Probable ATP-dependent RNA helicase DDX5 OS=Homo sapiens GN=DDX5 PE=1 SV=1	I.KQVSDLISV.L	FALSE	9	P17844	DDX5	class I	AML14_DCB
1660		>sp|Q13535|ATR_HUMAN Serine/threonine-protein kinase ATR OS=Homo sapiens GN=ATR PE=1 SV=3	R.SLLESVQKL.D	FALSE	9	Q13535	ATR	class I	AML14_DCB
1661		>sp|Q13535|ATR_HUMAN Serine/threonine-protein kinase ATR OS=Homo sapiens GN=ATR PE=1 SV=3	L.LTLFPRRIF.L	FALSE	9	Q13535	ATR	class I	AML14_DCB
1662		>sp|Q13535|ATR_HUMAN Serine/threonine-protein kinase ATR OS=Homo sapiens GN=ATR PE=1 SV=3	R.RFPEHVREI.L	FALSE	9	Q13535	ATR	class I	AML14_DCB
1663		>sp|Q13535|ATR_HUMAN Serine/threonine-protein kinase ATR OS=Homo sapiens GN=ATR PE=1 SV=3	R.RFPEHVREI.L	FALSE	9	Q13535	ATR	class I	AML14_DCB
1664		>sp|Q13535|ATR_HUMAN Serine/threonine-protein kinase ATR OS=Homo sapiens GN=ATR PE=1 SV=3	R.RFPEHVREI.L	FALSE	9	Q13535	ATR	class I	AML14_DCB
1665		>sp|Q13535|ATR_HUMAN Serine/threonine-protein kinase ATR OS=Homo sapiens GN=ATR PE=1 SV=3	R.RFPEHVREI.L	FALSE	9	Q13535	ATR	class I	AML14_DCB
1666		>sp|Q13535|ATR_HUMAN Serine/threonine-protein kinase ATR OS=Homo sapiens GN=ATR PE=1 SV=3	R.RFPEHVREI.L	FALSE	9	Q13535	ATR	class I	AML14_DCB
1667		>sp|Q13535|ATR_HUMAN Serine/threonine-protein kinase ATR OS=Homo sapiens GN=ATR PE=1 SV=3	G.RFMEETANF.E	FALSE	9	Q13535	ATR	class I	AML14_DCB
1668		>sp|Q13535|ATR_HUMAN Serine/threonine-protein kinase ATR OS=Homo sapiens GN=ATR PE=1 SV=3	L.RTFPDPTSW.Y	FALSE	9	Q13535	ATR	class I	AML14_DCB
1669		>sp|Q5VYK3|ECM29_HUMAN Proteasome-associated protein ECM29 homolog OS=Homo sapiens GN=ECM29 PE=1 SV=2	K.KVMELLVHL.N	FALSE	9	Q5VYK3	ECM29	class I	AML14_DCB
1670		>sp|Q5VYK3|ECM29_HUMAN Proteasome-associated protein ECM29 homolog OS=Homo sapiens GN=ECM29 PE=1 SV=2	K.KVMELLVHL.N	FALSE	9	Q5VYK3	ECM29	class I	AML14_DCB
1671		>sp|Q5VYK3|ECM29_HUMAN Proteasome-associated protein ECM29 homolog OS=Homo sapiens GN=ECM29 PE=1 SV=2	F.NLAEKPKTV.Q	FALSE	9	Q5VYK3	ECM29	class I	AML14_DCB
1672		>sp|Q5VYK3|ECM29_HUMAN Proteasome-associated protein ECM29 homolog OS=Homo sapiens GN=ECM29 PE=1 SV=2	F.NLAEKPKTV.Q	FALSE	9	Q5VYK3	ECM29	class I	AML14_DCB
1673		>sp|Q5VYK3|ECM29_HUMAN Proteasome-associated protein ECM29 homolog OS=Homo sapiens GN=ECM29 PE=1 SV=2	S.FLDSTSPLL.A	FALSE	9	Q5VYK3	ECM29	class I	AML14_DCB
1674		>sp|Q5VYK3|ECM29_HUMAN Proteasome-associated protein ECM29 homolog OS=Homo sapiens GN=ECM29 PE=1 SV=2	K.GMMSTVTEV.R	FALSE	9	Q5VYK3	ECM29	class I	AML14_DCB
1675		>sp|P52701|MSH6_HUMAN DNA mismatch repair protein Msh6 OS=Homo sapiens GN=MSH6 PE=1 SV=2	L.KEKEEDSSGHTRAY.G	FALSE	14	P52701	MSH6	class I	AML14_DCB
1676		>sp|P52701|MSH6_HUMAN DNA mismatch repair protein Msh6 OS=Homo sapiens GN=MSH6 PE=1 SV=2	K.EEDSSGHTRAY.G	FALSE	11	P52701	MSH6	class I	AML14_DCB
1677		>sp|P52701|MSH6_HUMAN DNA mismatch repair protein Msh6 OS=Homo sapiens GN=MSH6 PE=1 SV=2	K.EEDSSGHTRAY.G	FALSE	11	P52701	MSH6	class I	AML14_DCB
1678		>sp|P52701|MSH6_HUMAN DNA mismatch repair protein Msh6 OS=Homo sapiens GN=MSH6 PE=1 SV=2	D.KISEVVELL.K	FALSE	9	P52701	MSH6	class I	AML14_DCB
1679		>sp|P52701|MSH6_HUMAN DNA mismatch repair protein Msh6 OS=Homo sapiens GN=MSH6 PE=1 SV=2	D.KISEVVELL.K	FALSE	9	P52701	MSH6	class I	AML14_DCB
1680		>sp|P52701|MSH6_HUMAN DNA mismatch repair protein Msh6 OS=Homo sapiens GN=MSH6 PE=1 SV=2	D.KISEVVELL.K	FALSE	9	P52701	MSH6	class I	AML14_DCB
1681		>sp|P52701|MSH6_HUMAN DNA mismatch repair protein Msh6 OS=Homo sapiens GN=MSH6 PE=1 SV=2	E.EEQENGKAY.C	FALSE	9	P52701	MSH6	class I	AML14_DCB
1682		>sp|Q9Y4B6|DCAF1_HUMAN DDB1- and CUL4-associated factor 1 OS=Homo sapiens GN=DCAF1 PE=1 SV=3	A.READQPLRTY.S	FALSE	10	Q9Y4B6	DCAF1	class I	AML14_DCB
1683		>sp|Q9Y4B6|DCAF1_HUMAN DDB1- and CUL4-associated factor 1 OS=Homo sapiens GN=DCAF1 PE=1 SV=3	A.READQPLRTY.S	FALSE	10	Q9Y4B6	DCAF1	class I	AML14_DCB
1684		>sp|Q9Y4B6|DCAF1_HUMAN DDB1- and CUL4-associated factor 1 OS=Homo sapiens GN=DCAF1 PE=1 SV=3	A.READQPLRTY.S	FALSE	10	Q9Y4B6	DCAF1	class I	AML14_DCB
1685		>sp|Q9Y4B6|DCAF1_HUMAN DDB1- and CUL4-associated factor 1 OS=Homo sapiens GN=DCAF1 PE=1 SV=3	A.HLAIKLEQV.K	FALSE	9	Q9Y4B6	DCAF1	class I	AML14_DCB
1686		>sp|Q9Y4B6|DCAF1_HUMAN DDB1- and CUL4-associated factor 1 OS=Homo sapiens GN=DCAF1 PE=1 SV=3	L.AILTVVPKI.Q	FALSE	9	Q9Y4B6	DCAF1	class I	AML14_DCB
1687		>sp|Q9Y4B6|DCAF1_HUMAN DDB1- and CUL4-associated factor 1 OS=Homo sapiens GN=DCAF1 PE=1 SV=3	L.AILTVVPKI.Q	FALSE	9	Q9Y4B6	DCAF1	class I	AML14_DCB
1688		>sp|Q9Y4B6|DCAF1_HUMAN DDB1- and CUL4-associated factor 1 OS=Homo sapiens GN=DCAF1 PE=1 SV=3	D.VLDEAGSTV.S	FALSE	9	Q9Y4B6	DCAF1	class I	AML14_DCB
1689		>sp|Q9Y4B6|DCAF1_HUMAN DDB1- and CUL4-associated factor 1 OS=Homo sapiens GN=DCAF1 PE=1 SV=3	D.VLDEAGSTV.S	FALSE	9	Q9Y4B6	DCAF1	class I	AML14_DCB
1690		>sp|Q9Y4B6|DCAF1_HUMAN DDB1- and CUL4-associated factor 1 OS=Homo sapiens GN=DCAF1 PE=1 SV=3	F.HLLHTVPAL.D	FALSE	9	Q9Y4B6	DCAF1	class I	AML14_DCB
1691		>sp|P49454|CENPF_HUMAN Centromere protein F OS=Homo sapiens GN=CENPF PE=1 SV=2	L.AYMELQQKAEF.S	FALSE	11	P49454	CENPF	class I	AML14_DCB
1692		>sp|P49454|CENPF_HUMAN Centromere protein F OS=Homo sapiens GN=CENPF PE=1 SV=2	E.KYISGPHEL.S	FALSE	9	P49454	CENPF	class I	AML14_DCB
1693		>sp|P49454|CENPF_HUMAN Centromere protein F OS=Homo sapiens GN=CENPF PE=1 SV=2	T.HLQEKLQSL.E	FALSE	9	P49454	CENPF	class I	AML14_DCB
1694		>sp|Q9NVI1|FANCI_HUMAN Fanconi anemia group I protein OS=Homo sapiens GN=FANCI PE=1 SV=4	D.KLQEFLQTL.R	FALSE	9	Q9NVI1	FANCI	class I	AML14_DCB
1695		>sp|Q9NVI1|FANCI_HUMAN Fanconi anemia group I protein OS=Homo sapiens GN=FANCI PE=1 SV=4	D.KLQEFLQTL.R	FALSE	9	Q9NVI1	FANCI	class I	AML14_DCB
1696		>sp|Q9NVI1|FANCI_HUMAN Fanconi anemia group I protein OS=Homo sapiens GN=FANCI PE=1 SV=4	E.VVKNSVHSW.D	FALSE	9	Q9NVI1	FANCI	class I	AML14_DCB
1697		>sp|Q9NVI1|FANCI_HUMAN Fanconi anemia group I protein OS=Homo sapiens GN=FANCI PE=1 SV=4	G.KTIETSPSL.S	FALSE	9	Q9NVI1	FANCI	class I	AML14_DCB
1698		>sp|Q9NVI1|FANCI_HUMAN Fanconi anemia group I protein OS=Homo sapiens GN=FANCI PE=1 SV=4	Q.KIFSAVQQF.Y	FALSE	9	Q9NVI1	FANCI	class I	AML14_DCB
1699		>sp|Q9NVI1|FANCI_HUMAN Fanconi anemia group I protein OS=Homo sapiens GN=FANCI PE=1 SV=4	Q.KIFSAVQQF.Y	FALSE	9	Q9NVI1	FANCI	class I	AML14_DCB
1700		>sp|Q9NVI1|FANCI_HUMAN Fanconi anemia group I protein OS=Homo sapiens GN=FANCI PE=1 SV=4	Q.KIFSAVQQF.Y	FALSE	9	Q9NVI1	FANCI	class I	AML14_DCB
1701		>sp|Q9NVI1|FANCI_HUMAN Fanconi anemia group I protein OS=Homo sapiens GN=FANCI PE=1 SV=4	Q.KIFSAVQQF.Y	FALSE	9	Q9NVI1	FANCI	class I	AML14_DCB
1702		>sp|Q9NVI1|FANCI_HUMAN Fanconi anemia group I protein OS=Homo sapiens GN=FANCI PE=1 SV=4	Q.KIFSAVQQF.Y	FALSE	9	Q9NVI1	FANCI	class I	AML14_DCB
1703		>sp|Q8N766|EMC1_HUMAN ER membrane protein complex subunit 1 OS=Homo sapiens GN=EMC1 PE=1 SV=1	V.VPFSHVNIV.K	FALSE	9	Q8N766	EMC1	class I	AML14_DCB
1704		>sp|Q8N766|EMC1_HUMAN ER membrane protein complex subunit 1 OS=Homo sapiens GN=EMC1 PE=1 SV=1	L.QYHYGTLSL.L	FALSE	9	Q8N766	EMC1	class I	AML14_DCB
1705		>sp|Q8N766|EMC1_HUMAN ER membrane protein complex subunit 1 OS=Homo sapiens GN=EMC1 PE=1 SV=1	R.RLLDTTITF.S	FALSE	9	Q8N766	EMC1	class I	AML14_DCB
1706		>sp|Q8N766|EMC1_HUMAN ER membrane protein complex subunit 1 OS=Homo sapiens GN=EMC1 PE=1 SV=1	T.DAHHERTFI.G	FALSE	9	Q8N766	EMC1	class I	AML14_DCB
1707		>sp|Q8N766|EMC1_HUMAN ER membrane protein complex subunit 1 OS=Homo sapiens GN=EMC1 PE=1 SV=1	Y.IFPSSISAM.E	FALSE	9	Q8N766	EMC1	class I	AML14_DCB
1708		>sp|Q8N766|EMC1_HUMAN ER membrane protein complex subunit 1 OS=Homo sapiens GN=EMC1 PE=1 SV=1	Y.IFPSSISAM.E	FALSE	9	Q8N766	EMC1	class I	AML14_DCB
1709		>sp|Q8IXJ9|ASXL1_HUMAN Putative Polycomb group protein ASXL1 OS=Homo sapiens GN=ASXL1 PE=1 SV=3	E.RTWAEAARLVL.E	FALSE	11	Q8IXJ9	ASXL1	class I	AML14_DCB
1710		>sp|Q8IXJ9|ASXL1_HUMAN Putative Polycomb group protein ASXL1 OS=Homo sapiens GN=ASXL1 PE=1 SV=3	S.DAPMTPKQI.L	FALSE	9	Q8IXJ9	ASXL1	class I	AML14_DCB
1711		>sp|Q8IXJ9|ASXL1_HUMAN Putative Polycomb group protein ASXL1 OS=Homo sapiens GN=ASXL1 PE=1 SV=3	S.DAPMTPKQI.L	FALSE	9	Q8IXJ9	ASXL1	class I	AML14_DCB
1712	M[+16]	>sp|Q8IXJ9|ASXL1_HUMAN Putative Polycomb group protein ASXL1 OS=Homo sapiens GN=ASXL1 PE=1 SV=3	S.DAPM[+15.995]TPKQI.L	FALSE	9	Q8IXJ9	ASXL1	class I	AML14_DCB
1713		>sp|Q8IXJ9|ASXL1_HUMAN Putative Polycomb group protein ASXL1 OS=Homo sapiens GN=ASXL1 PE=1 SV=3	L.EEMDSKEQF.S	FALSE	9	Q8IXJ9	ASXL1	class I	AML14_DCB
1714	M[+16]	>sp|Q8IXJ9|ASXL1_HUMAN Putative Polycomb group protein ASXL1 OS=Homo sapiens GN=ASXL1 PE=1 SV=3	L.EEM[+15.995]DSKEQF.S	FALSE	9	Q8IXJ9	ASXL1	class I	AML14_DCB
1715		>sp|Q99615|DNJC7_HUMAN DnaJ homolog subfamily C member 7 OS=Homo sapiens GN=DNAJC7 PE=1 SV=2	A.SYYGNRAATL.M	FALSE	10	Q99615	DNAJC7	class I	AML14_DCB
1716		>sp|Q99615|DNJC7_HUMAN DnaJ homolog subfamily C member 7 OS=Homo sapiens GN=DNAJC7 PE=1 SV=2	A.SYYGNRAATL.M	FALSE	10	Q99615	DNAJC7	class I	AML14_DCB
1717		>sp|Q99615|DNJC7_HUMAN DnaJ homolog subfamily C member 7 OS=Homo sapiens GN=DNAJC7 PE=1 SV=2	A.SEDEIKKAY.R	FALSE	9	Q99615	DNAJC7	class I	AML14_DCB
1718		>sp|Q99615|DNJC7_HUMAN DnaJ homolog subfamily C member 7 OS=Homo sapiens GN=DNAJC7 PE=1 SV=2	A.SEDEIKKAY.R	FALSE	9	Q99615	DNAJC7	class I	AML14_DCB
1719		>sp|P52298|NCBP2_HUMAN Nuclear cap-binding protein subunit 2 OS=Homo sapiens GN=NCBP2 PE=1 SV=1	A.DAENAMRYI.N	FALSE	9	P52298	NCBP2	class I	AML14_DCB
1720		>sp|P52298|NCBP2_HUMAN Nuclear cap-binding protein subunit 2 OS=Homo sapiens GN=NCBP2 PE=1 SV=1	A.DAENAMRYI.N	FALSE	9	P52298	NCBP2	class I	AML14_DCB
1721		>sp|P52298|NCBP2_HUMAN Nuclear cap-binding protein subunit 2 OS=Homo sapiens GN=NCBP2 PE=1 SV=1	A.DAENAMRYI.N	FALSE	9	P52298	NCBP2	class I	AML14_DCB
1722		>sp|P52298|NCBP2_HUMAN Nuclear cap-binding protein subunit 2 OS=Homo sapiens GN=NCBP2 PE=1 SV=1	A.DAENAMRYI.N	FALSE	9	P52298	NCBP2	class I	AML14_DCB
1723		>sp|P52298|NCBP2_HUMAN Nuclear cap-binding protein subunit 2 OS=Homo sapiens GN=NCBP2 PE=1 SV=1	A.DAENAMRYI.N	FALSE	9	P52298	NCBP2	class I	AML14_DCB
1724		>sp|P52298|NCBP2_HUMAN Nuclear cap-binding protein subunit 2 OS=Homo sapiens GN=NCBP2 PE=1 SV=1	A.DAENAMRYI.N	FALSE	9	P52298	NCBP2	class I	AML14_DCB
1725	M[+16]	>sp|P52298|NCBP2_HUMAN Nuclear cap-binding protein subunit 2 OS=Homo sapiens GN=NCBP2 PE=1 SV=1	A.DAENAM[+15.995]RYI.N	FALSE	9	P52298	NCBP2	class I	AML14_DCB
1726	M[+16]	>sp|P52298|NCBP2_HUMAN Nuclear cap-binding protein subunit 2 OS=Homo sapiens GN=NCBP2 PE=1 SV=1	A.DAENAM[+15.995]RYI.N	FALSE	9	P52298	NCBP2	class I	AML14_DCB
1727	M[+16]	>sp|P52298|NCBP2_HUMAN Nuclear cap-binding protein subunit 2 OS=Homo sapiens GN=NCBP2 PE=1 SV=1	A.DAENAM[+15.995]RYI.N	FALSE	9	P52298	NCBP2	class I	AML14_DCB
1728	M[+16]	>sp|P52298|NCBP2_HUMAN Nuclear cap-binding protein subunit 2 OS=Homo sapiens GN=NCBP2 PE=1 SV=1	A.DAENAM[+15.995]RYI.N	FALSE	9	P52298	NCBP2	class I	AML14_DCB
1729	M[+16]	>sp|P52298|NCBP2_HUMAN Nuclear cap-binding protein subunit 2 OS=Homo sapiens GN=NCBP2 PE=1 SV=1	A.DAENAM[+15.995]RYI.N	FALSE	9	P52298	NCBP2	class I	AML14_DCB
1730		>sp|P62917|RL8_HUMAN 60S ribosomal protein L8 OS=Homo sapiens GN=RPL8 PE=1 SV=2	A.AEGIHTGQF.V	FALSE	9	P62917	RPL8	class I	AML14_DCB
1731		>sp|P62917|RL8_HUMAN 60S ribosomal protein L8 OS=Homo sapiens GN=RPL8 PE=1 SV=2	A.AEGIHTGQFVY.C	FALSE	11	P62917	RPL8	class I	AML14_DCB
1732		>sp|P62917|RL8_HUMAN 60S ribosomal protein L8 OS=Homo sapiens GN=RPL8 PE=1 SV=2	G.NYATVISH.N	FALSE	8	P62917	RPL8	class I	AML14_DCB
1733		>sp|P62917|RL8_HUMAN 60S ribosomal protein L8 OS=Homo sapiens GN=RPL8 PE=1 SV=2	R.DAPAGRKV.G	FALSE	8	P62917	RPL8	class I	AML14_DCB
1734		>sp|P62917|RL8_HUMAN 60S ribosomal protein L8 OS=Homo sapiens GN=RPL8 PE=1 SV=2	R.DAPAGRKV.G	FALSE	8	P62917	RPL8	class I	AML14_DCB
1735		>sp|P62917|RL8_HUMAN 60S ribosomal protein L8 OS=Homo sapiens GN=RPL8 PE=1 SV=2	R.DAPAGRKV.G	FALSE	8	P62917	RPL8	class I	AML14_DCB
1736		>sp|P62917|RL8_HUMAN 60S ribosomal protein L8 OS=Homo sapiens GN=RPL8 PE=1 SV=2	R.DAPAGRKV.G	FALSE	8	P62917	RPL8	class I	AML14_DCB
1737		>sp|P62888|RL30_HUMAN 60S ribosomal protein L30 OS=Homo sapiens GN=RPL30 PE=1 SV=2	D.PGDSDIIRSMPEQTGEK.-	FALSE	17	P62888	RPL30	class I	AML14_DCB
1738		>sp|P62888|RL30_HUMAN 60S ribosomal protein L30 OS=Homo sapiens GN=RPL30 PE=1 SV=2	D.PGDSDIIRSMPEQTGEK.-	FALSE	17	P62888	RPL30	class I	AML14_DCB
1739	M[+16]	>sp|P62888|RL30_HUMAN 60S ribosomal protein L30 OS=Homo sapiens GN=RPL30 PE=1 SV=2	D.PGDSDIIRSM[+15.995]PEQTGEK.-	FALSE	17	P62888	RPL30	class I	AML14_DCB
1740	M[+16]	>sp|P62888|RL30_HUMAN 60S ribosomal protein L30 OS=Homo sapiens GN=RPL30 PE=1 SV=2	D.PGDSDIIRSM[+15.995]PEQTGEK.-	FALSE	17	P62888	RPL30	class I	AML14_DCB
1741	M[+16]	>sp|P62888|RL30_HUMAN 60S ribosomal protein L30 OS=Homo sapiens GN=RPL30 PE=1 SV=2	D.PGDSDIIRSM[+15.995]PEQTGEK.-	FALSE	17	P62888	RPL30	class I	AML14_DCB
1742		>sp|Q9H0C5|BTBD1_HUMAN BTB/POZ domain-containing protein 1 OS=Homo sapiens GN=BTBD1 PE=1 SV=1	R.FLYSDEVQI.G	FALSE	9	Q9H0C5	BTBD1	class I	AML14_DCB
1743		>sp|Q9H0C5|BTBD1_HUMAN BTB/POZ domain-containing protein 1 OS=Homo sapiens GN=BTBD1 PE=1 SV=1	R.FLYSDEVQI.G	FALSE	9	Q9H0C5	BTBD1	class I	AML14_DCB
1744		>sp|Q9H0C5|BTBD1_HUMAN BTB/POZ domain-containing protein 1 OS=Homo sapiens GN=BTBD1 PE=1 SV=1	R.FLYSDEVQI.G	FALSE	9	Q9H0C5	BTBD1	class I	AML14_DCB
1745		>sp|Q9H0C5|BTBD1_HUMAN BTB/POZ domain-containing protein 1 OS=Homo sapiens GN=BTBD1 PE=1 SV=1	A.RLFDEPQLA.S	FALSE	9	Q9H0C5	BTBD1	class I	AML14_DCB
1746		>sp|Q9H0C5|BTBD1_HUMAN BTB/POZ domain-containing protein 1 OS=Homo sapiens GN=BTBD1 PE=1 SV=1	A.RLFDEPQLASL.C	FALSE	11	Q9H0C5	BTBD1	class I	AML14_DCB
1747		>sp|Q9H0C5|BTBD1_HUMAN BTB/POZ domain-containing protein 1 OS=Homo sapiens GN=BTBD1 PE=1 SV=1	S.RLFGAVVRW.A	FALSE	9	Q9H0C5	BTBD1	class I	AML14_DCB
1748		>sp|Q9H0C5|BTBD1_HUMAN BTB/POZ domain-containing protein 1 OS=Homo sapiens GN=BTBD1 PE=1 SV=1	S.RLFGAVVRW.A	FALSE	9	Q9H0C5	BTBD1	class I	AML14_DCB
1749		>sp|Q9H0C5|BTBD1_HUMAN BTB/POZ domain-containing protein 1 OS=Homo sapiens GN=BTBD1 PE=1 SV=1	S.RLFGAVVRW.A	FALSE	9	Q9H0C5	BTBD1	class I	AML14_DCB
1750		>sp|Q15049|MLC1_HUMAN Membrane protein MLC1 OS=Homo sapiens GN=MLC1 PE=1 SV=5	E.LAYDRMPTL.E	FALSE	9	Q15049	MLC1	class I	AML14_DCB
1751		>sp|Q15049|MLC1_HUMAN Membrane protein MLC1 OS=Homo sapiens GN=MLC1 PE=1 SV=5	E.LAYDRMPTL.E	FALSE	9	Q15049	MLC1	class I	AML14_DCB
1752	M[+16]	>sp|Q15049|MLC1_HUMAN Membrane protein MLC1 OS=Homo sapiens GN=MLC1 PE=1 SV=5	E.LAYDRM[+15.995]PTL.E	FALSE	9	Q15049	MLC1	class I	AML14_DCB
1753		>sp|Q15049|MLC1_HUMAN Membrane protein MLC1 OS=Homo sapiens GN=MLC1 PE=1 SV=5	C.FPSAIASHV.A	FALSE	9	Q15049	MLC1	class I	AML14_DCB
1754		>sp|Q15049|MLC1_HUMAN Membrane protein MLC1 OS=Homo sapiens GN=MLC1 PE=1 SV=5	C.FPSAIASHV.A	FALSE	9	Q15049	MLC1	class I	AML14_DCB
1755		>sp|Q15049|MLC1_HUMAN Membrane protein MLC1 OS=Homo sapiens GN=MLC1 PE=1 SV=5	L.KEFDKEKAW.R	FALSE	9	Q15049	MLC1	class I	AML14_DCB
1756		>sp|Q96BY9|SARAF_HUMAN Store-operated calcium entry-associated regulatory factor OS=Homo sapiens GN=SARAF PE=1 SV=1	C.DSYTPKVI.Q	FALSE	8	Q96BY9	SARAF	class I	AML14_DCB
1757		>sp|Q96BY9|SARAF_HUMAN Store-operated calcium entry-associated regulatory factor OS=Homo sapiens GN=SARAF PE=1 SV=1	C.DSYTPKVI.Q	FALSE	8	Q96BY9	SARAF	class I	AML14_DCB
1758		>sp|Q96BY9|SARAF_HUMAN Store-operated calcium entry-associated regulatory factor OS=Homo sapiens GN=SARAF PE=1 SV=1	C.DSYTPKVI.Q	FALSE	8	Q96BY9	SARAF	class I	AML14_DCB
1759		>sp|Q96BY9|SARAF_HUMAN Store-operated calcium entry-associated regulatory factor OS=Homo sapiens GN=SARAF PE=1 SV=1	C.DSYTPKVI.Q	FALSE	8	Q96BY9	SARAF	class I	AML14_DCB
1760		>sp|Q96BY9|SARAF_HUMAN Store-operated calcium entry-associated regulatory factor OS=Homo sapiens GN=SARAF PE=1 SV=1	C.DSYTPKVI.Q	FALSE	8	Q96BY9	SARAF	class I	AML14_DCB
1761		>sp|Q96BY9|SARAF_HUMAN Store-operated calcium entry-associated regulatory factor OS=Homo sapiens GN=SARAF PE=1 SV=1	D.IAYKFGKTV.V	FALSE	9	Q96BY9	SARAF	class I	AML14_DCB
1762		>sp|Q96BY9|SARAF_HUMAN Store-operated calcium entry-associated regulatory factor OS=Homo sapiens GN=SARAF PE=1 SV=1	D.IAYKFGKTV.V	FALSE	9	Q96BY9	SARAF	class I	AML14_DCB
1763		>sp|Q96BY9|SARAF_HUMAN Store-operated calcium entry-associated regulatory factor OS=Homo sapiens GN=SARAF PE=1 SV=1	D.IAYKFGKTV.V	FALSE	9	Q96BY9	SARAF	class I	AML14_DCB
1764		>sp|Q96BY9|SARAF_HUMAN Store-operated calcium entry-associated regulatory factor OS=Homo sapiens GN=SARAF PE=1 SV=1	D.IAYKFGKTV.V	FALSE	9	Q96BY9	SARAF	class I	AML14_DCB
1765		>sp|Q96BY9|SARAF_HUMAN Store-operated calcium entry-associated regulatory factor OS=Homo sapiens GN=SARAF PE=1 SV=1	I.AYKFGKTV.V	FALSE	8	Q96BY9	SARAF	class I	AML14_DCB
1766		>sp|Q96BY9|SARAF_HUMAN Store-operated calcium entry-associated regulatory factor OS=Homo sapiens GN=SARAF PE=1 SV=1	I.AYKFGKTV.V	FALSE	8	Q96BY9	SARAF	class I	AML14_DCB
1767		>sp|Q96BY9|SARAF_HUMAN Store-operated calcium entry-associated regulatory factor OS=Homo sapiens GN=SARAF PE=1 SV=1	I.AYKFGKTV.V	FALSE	8	Q96BY9	SARAF	class I	AML14_DCB
1768		>sp|P51665|PSMD7_HUMAN 26S proteasome non-ATPase regulatory subunit 7 OS=Homo sapiens GN=PSMD7 PE=1 SV=2	K.KVLDVSNSF.A	FALSE	9	P51665	PSMD7	class I	AML14_DCB
1769		>sp|P51665|PSMD7_HUMAN 26S proteasome non-ATPase regulatory subunit 7 OS=Homo sapiens GN=PSMD7 PE=1 SV=2	K.KVLDVSNSF.A	FALSE	9	P51665	PSMD7	class I	AML14_DCB
1770		>sp|P51665|PSMD7_HUMAN 26S proteasome non-ATPase regulatory subunit 7 OS=Homo sapiens GN=PSMD7 PE=1 SV=2	K.KVLDVSNSF.A	FALSE	9	P51665	PSMD7	class I	AML14_DCB
1771		>sp|P51665|PSMD7_HUMAN 26S proteasome non-ATPase regulatory subunit 7 OS=Homo sapiens GN=PSMD7 PE=1 SV=2	S.KLLDIRSYL.E	FALSE	9	P51665	PSMD7	class I	AML14_DCB
1772		>sp|P51665|PSMD7_HUMAN 26S proteasome non-ATPase regulatory subunit 7 OS=Homo sapiens GN=PSMD7 PE=1 SV=2	S.KLLDIRSYL.E	FALSE	9	P51665	PSMD7	class I	AML14_DCB
1773		>sp|P51665|PSMD7_HUMAN 26S proteasome non-ATPase regulatory subunit 7 OS=Homo sapiens GN=PSMD7 PE=1 SV=2	S.KLLDIRSYL.E	FALSE	9	P51665	PSMD7	class I	AML14_DCB
1774		>sp|P51665|PSMD7_HUMAN 26S proteasome non-ATPase regulatory subunit 7 OS=Homo sapiens GN=PSMD7 PE=1 SV=2	S.KLLDIRSYL.E	FALSE	9	P51665	PSMD7	class I	AML14_DCB
1775		>sp|P51665|PSMD7_HUMAN 26S proteasome non-ATPase regulatory subunit 7 OS=Homo sapiens GN=PSMD7 PE=1 SV=2	A.SLIRSVVAL.H	FALSE	9	P51665	PSMD7	class I	AML14_DCB
1776		>sp|P28482|MK01_HUMAN Mitogen-activated protein kinase 1 OS=Homo sapiens GN=MAPK1 PE=1 SV=3	C.SAYDNVNKV.R	FALSE	9	P28482	MAPK1	class I	AML14_DCB
1777		>sp|P28482|MK01_HUMAN Mitogen-activated protein kinase 1 OS=Homo sapiens GN=MAPK1 PE=1 SV=3	C.SAYDNVNKV.R	FALSE	9	P28482	MAPK1	class I	AML14_DCB
1778		>sp|P28482|MK01_HUMAN Mitogen-activated protein kinase 1 OS=Homo sapiens GN=MAPK1 PE=1 SV=3	L.REIKILLRF.R	FALSE	9	P28482	MAPK1	class I	AML14_DCB
1779		>sp|P28482|MK01_HUMAN Mitogen-activated protein kinase 1 OS=Homo sapiens GN=MAPK1 PE=1 SV=3	L.KYIHSANVL.H	FALSE	9	P28482	MAPK1	class I	AML14_DCB
1780		>sp|P28482|MK01_HUMAN Mitogen-activated protein kinase 1 OS=Homo sapiens GN=MAPK1 PE=1 SV=3	L.KYIHSANVL.H	FALSE	9	P28482	MAPK1	class I	AML14_DCB
1781		>sp|P28482|MK01_HUMAN Mitogen-activated protein kinase 1 OS=Homo sapiens GN=MAPK1 PE=1 SV=3	L.KYIHSANVL.H	FALSE	9	P28482	MAPK1	class I	AML14_DCB
1782		>sp|P10809|CH60_HUMAN 60 kDa heat shock protein, mitochondrial OS=Homo sapiens GN=HSPD1 PE=1 SV=2	G.RTVIIEQSW.G	FALSE	9	P10809	HSPD1	class I	AML14_DCB
1783		>sp|P10809|CH60_HUMAN 60 kDa heat shock protein, mitochondrial OS=Homo sapiens GN=HSPD1 PE=1 SV=2	K.APGFGDNRK.N	FALSE	9	P10809	HSPD1	class I	AML14_DCB
1784		>sp|P10809|CH60_HUMAN 60 kDa heat shock protein, mitochondrial OS=Homo sapiens GN=HSPD1 PE=1 SV=2	K.VGEVIVTK.D	FALSE	8	P10809	HSPD1	class I	AML14_DCB
1785		>sp|P10809|CH60_HUMAN 60 kDa heat shock protein, mitochondrial OS=Homo sapiens GN=HSPD1 PE=1 SV=2	K.DRVTDALNATR.A	FALSE	11	P10809	HSPD1	class I	AML14_DCB
1786		>sp|P10809|CH60_HUMAN 60 kDa heat shock protein, mitochondrial OS=Homo sapiens GN=HSPD1 PE=1 SV=2	R.VTDALNATR.A	FALSE	9	P10809	HSPD1	class I	AML14_DCB
1787		>sp|O15164|TIF1A_HUMAN Transcription intermediary factor 1-alpha OS=Homo sapiens GN=TRIM24 PE=1 SV=3	H.RYQFIEEAF.Q	FALSE	9	O15164	TRIM24	class I	AML14_DCB
1788		>sp|O15164|TIF1A_HUMAN Transcription intermediary factor 1-alpha OS=Homo sapiens GN=TRIM24 PE=1 SV=3	M.KLMQQQQEV.A	FALSE	9	O15164	TRIM24	class I	AML14_DCB
1789		>sp|O15164|TIF1A_HUMAN Transcription intermediary factor 1-alpha OS=Homo sapiens GN=TRIM24 PE=1 SV=3	S.KQLEHVMHF.S	FALSE	9	O15164	TRIM24	class I	AML14_DCB
1790		>sp|O15164|TIF1A_HUMAN Transcription intermediary factor 1-alpha OS=Homo sapiens GN=TRIM24 PE=1 SV=3	S.KQLEHVMHF.S	FALSE	9	O15164	TRIM24	class I	AML14_DCB
1791		>sp|O15164|TIF1A_HUMAN Transcription intermediary factor 1-alpha OS=Homo sapiens GN=TRIM24 PE=1 SV=3	A.FQDPVPLTV.P	FALSE	9	O15164	TRIM24	class I	AML14_DCB
1792		>sp|O15164|TIF1A_HUMAN Transcription intermediary factor 1-alpha OS=Homo sapiens GN=TRIM24 PE=1 SV=3	A.FQDPVPLTV.P	FALSE	9	O15164	TRIM24	class I	AML14_DCB
1793		>sp|O15164|TIF1A_HUMAN Transcription intermediary factor 1-alpha OS=Homo sapiens GN=TRIM24 PE=1 SV=3	A.FQDPVPLTV.P	FALSE	9	O15164	TRIM24	class I	AML14_DCB
1794		>sp|O15164|TIF1A_HUMAN Transcription intermediary factor 1-alpha OS=Homo sapiens GN=TRIM24 PE=1 SV=3	A.FQDPVPLTV.P	FALSE	9	O15164	TRIM24	class I	AML14_DCB
1795		>sp|Q16181|SEPT7_HUMAN Septin-7 OS=Homo sapiens GN=SEPT7 PE=1 SV=2	E.EENKLVKKI.K	FALSE	9	Q16181	SEPT7	class I	AML14_DCB
1796		>sp|Q16181|SEPT7_HUMAN Septin-7 OS=Homo sapiens GN=SEPT7 PE=1 SV=2	E.EENKLVKKI.K	FALSE	9	Q16181	SEPT7	class I	AML14_DCB
1797		>sp|Q16181|SEPT7_HUMAN Septin-7 OS=Homo sapiens GN=SEPT7 PE=1 SV=2	E.EENKLVKKI.K	FALSE	9	Q16181	SEPT7	class I	AML14_DCB
1798		>sp|Q16181|SEPT7_HUMAN Septin-7 OS=Homo sapiens GN=SEPT7 PE=1 SV=2	E.EENKLVKKI.K	FALSE	9	Q16181	SEPT7	class I	AML14_DCB
1799		>sp|Q16181|SEPT7_HUMAN Septin-7 OS=Homo sapiens GN=SEPT7 PE=1 SV=2	Q.YPWGVAEV.E	FALSE	8	Q16181	SEPT7	class I	AML14_DCB
1800		>sp|Q16181|SEPT7_HUMAN Septin-7 OS=Homo sapiens GN=SEPT7 PE=1 SV=2	Q.YPWGVAEV.E	FALSE	8	Q16181	SEPT7	class I	AML14_DCB
1801		>sp|Q16181|SEPT7_HUMAN Septin-7 OS=Homo sapiens GN=SEPT7 PE=1 SV=2	Q.KLKDSEAEL.Q	FALSE	9	Q16181	SEPT7	class I	AML14_DCB
1802		>sp|O43660|PLRG1_HUMAN Pleiotropic regulator 1 OS=Homo sapiens GN=PLRG1 PE=1 SV=1	R.KMAIKLRNEY.G	FALSE	10	O43660	PLRG1	class I	AML14_DCB
1803		>sp|O43660|PLRG1_HUMAN Pleiotropic regulator 1 OS=Homo sapiens GN=PLRG1 PE=1 SV=1	T.HPYPPGPGV.A	FALSE	9	O43660	PLRG1	class I	AML14_DCB
1804		>sp|O43660|PLRG1_HUMAN Pleiotropic regulator 1 OS=Homo sapiens GN=PLRG1 PE=1 SV=1	Y.RVISGHLGW.V	FALSE	9	O43660	PLRG1	class I	AML14_DCB
1805		>sp|O43660|PLRG1_HUMAN Pleiotropic regulator 1 OS=Homo sapiens GN=PLRG1 PE=1 SV=1	Y.RVISGHLGW.V	FALSE	9	O43660	PLRG1	class I	AML14_DCB
1806		>sp|O43660|PLRG1_HUMAN Pleiotropic regulator 1 OS=Homo sapiens GN=PLRG1 PE=1 SV=1	Y.RVISGHLGW.V	FALSE	9	O43660	PLRG1	class I	AML14_DCB
1807		>sp|O43660|PLRG1_HUMAN Pleiotropic regulator 1 OS=Homo sapiens GN=PLRG1 PE=1 SV=1	Y.RVISGHLGW.V	FALSE	9	O43660	PLRG1	class I	AML14_DCB
1808		>sp|O43660|PLRG1_HUMAN Pleiotropic regulator 1 OS=Homo sapiens GN=PLRG1 PE=1 SV=1	L.SLTGHISTV.R	FALSE	9	O43660	PLRG1	class I	AML14_DCB
1809		>sp|P63010|AP2B1_HUMAN AP-2 complex subunit beta OS=Homo sapiens GN=AP2B1 PE=1 SV=1	A.KLHDINAQM.V	FALSE	9	P63010	AP2B1	class I	AML14_DCB
1810	M[+16]	>sp|P63010|AP2B1_HUMAN AP-2 complex subunit beta OS=Homo sapiens GN=AP2B1 PE=1 SV=1	A.KLHDINAQM[+15.995].V	FALSE	9	P63010	AP2B1	class I	AML14_DCB
1811		>sp|P63010|AP2B1_HUMAN AP-2 complex subunit beta OS=Homo sapiens GN=AP2B1 PE=1 SV=1	K.YPNKYESII.A	FALSE	9	P63010	AP2B1	class I	AML14_DCB
1812		>sp|P63010|AP2B1_HUMAN AP-2 complex subunit beta OS=Homo sapiens GN=AP2B1 PE=1 SV=1	L.TLLTAIVKL.F	FALSE	9	P63010	AP2B1	class I	AML14_DCB
1813		>sp|P63010|AP2B1_HUMAN AP-2 complex subunit beta OS=Homo sapiens GN=AP2B1 PE=1 SV=1	L.TLLTAIVKL.F	FALSE	9	P63010	AP2B1	class I	AML14_DCB
1814		>sp|P63010|AP2B1_HUMAN AP-2 complex subunit beta OS=Homo sapiens GN=AP2B1 PE=1 SV=1	L.NADTVSSKL.Q	FALSE	9	P63010	AP2B1	class I	AML14_DCB
1815		>sp|Q14103|HNRPD_HUMAN Heterogeneous nuclear ribonucleoprotein D0 OS=Homo sapiens GN=HNRNPD PE=1 SV=1	H.SEAATAQREEW.K	FALSE	11	Q14103	HNRNPD	class I	AML14_DCB
1816		>sp|Q14103|HNRPD_HUMAN Heterogeneous nuclear ribonucleoprotein D0 OS=Homo sapiens GN=HNRNPD PE=1 SV=1	H.SEAATAQREEW.K	FALSE	11	Q14103	HNRNPD	class I	AML14_DCB
1817		>sp|Q14103|HNRPD_HUMAN Heterogeneous nuclear ribonucleoprotein D0 OS=Homo sapiens GN=HNRNPD PE=1 SV=1	W.KMFIGGLSW.D	FALSE	9	Q14103	HNRNPD	class I	AML14_DCB
1818		>sp|Q14103|HNRPD_HUMAN Heterogeneous nuclear ribonucleoprotein D0 OS=Homo sapiens GN=HNRNPD PE=1 SV=1	W.KMFIGGLSW.D	FALSE	9	Q14103	HNRNPD	class I	AML14_DCB
1819		>sp|Q14103|HNRPD_HUMAN Heterogeneous nuclear ribonucleoprotein D0 OS=Homo sapiens GN=HNRNPD PE=1 SV=1	W.KMFIGGLSW.D	FALSE	9	Q14103	HNRNPD	class I	AML14_DCB
1820	M[+16]	>sp|Q14103|HNRPD_HUMAN Heterogeneous nuclear ribonucleoprotein D0 OS=Homo sapiens GN=HNRNPD PE=1 SV=1	W.KM[+15.995]FIGGLSW.D	FALSE	9	Q14103	HNRNPD	class I	AML14_DCB
1821	M[+16]	>sp|Q14103|HNRPD_HUMAN Heterogeneous nuclear ribonucleoprotein D0 OS=Homo sapiens GN=HNRNPD PE=1 SV=1	W.KM[+15.995]FIGGLSW.D	FALSE	9	Q14103	HNRNPD	class I	AML14_DCB
1822	M[+16]	>sp|Q14103|HNRPD_HUMAN Heterogeneous nuclear ribonucleoprotein D0 OS=Homo sapiens GN=HNRNPD PE=1 SV=1	W.KM[+15.995]FIGGLSW.D	FALSE	9	Q14103	HNRNPD	class I	AML14_DCB
1823	M[+16]	>sp|Q14103|HNRPD_HUMAN Heterogeneous nuclear ribonucleoprotein D0 OS=Homo sapiens GN=HNRNPD PE=1 SV=1	W.KM[+15.995]FIGGLSW.D	FALSE	9	Q14103	HNRNPD	class I	AML14_DCB
1824		>sp|Q14103|HNRPD_HUMAN Heterogeneous nuclear ribonucleoprotein D0 OS=Homo sapiens GN=HNRNPD PE=1 SV=1	S.KEQYQQQQQW.G	FALSE	10	Q14103	HNRNPD	class I	AML14_DCB
1825		>sp|Q14103|HNRPD_HUMAN Heterogeneous nuclear ribonucleoprotein D0 OS=Homo sapiens GN=HNRNPD PE=1 SV=1	S.KEQYQQQQQW.G	FALSE	10	Q14103	HNRNPD	class I	AML14_DCB
1826		>sp|Q14103|HNRPD_HUMAN Heterogeneous nuclear ribonucleoprotein D0 OS=Homo sapiens GN=HNRNPD PE=1 SV=1	S.KEQYQQQQQW.G	FALSE	10	Q14103	HNRNPD	class I	AML14_DCB
1827	M[+16]	>sp|O95067|CCNB2_HUMAN G2/mitotic-specific cyclin-B2 OS=Homo sapiens GN=CCNB2 PE=1 SV=1	F.RLLQETLYM[+15.995].C	FALSE	9	O95067	CCNB2	class I	AML14_DCB
1828		>sp|O95067|CCNB2_HUMAN G2/mitotic-specific cyclin-B2 OS=Homo sapiens GN=CCNB2 PE=1 SV=1	D.FVYITDNAY.T	FALSE	9	O95067	CCNB2	class I	AML14_DCB
1829		>sp|O95067|CCNB2_HUMAN G2/mitotic-specific cyclin-B2 OS=Homo sapiens GN=CCNB2 PE=1 SV=1	D.FVYITDNAY.T	FALSE	9	O95067	CCNB2	class I	AML14_DCB
1830		>sp|O95067|CCNB2_HUMAN G2/mitotic-specific cyclin-B2 OS=Homo sapiens GN=CCNB2 PE=1 SV=1	D.FVYITDNAY.T	FALSE	9	O95067	CCNB2	class I	AML14_DCB
1831		>sp|O95067|CCNB2_HUMAN G2/mitotic-specific cyclin-B2 OS=Homo sapiens GN=CCNB2 PE=1 SV=1	D.FVYITDNAY.T	FALSE	9	O95067	CCNB2	class I	AML14_DCB
1832		>sp|O95067|CCNB2_HUMAN G2/mitotic-specific cyclin-B2 OS=Homo sapiens GN=CCNB2 PE=1 SV=1	D.NAYTSSQI.R	FALSE	8	O95067	CCNB2	class I	AML14_DCB
1833		>sp|O95067|CCNB2_HUMAN G2/mitotic-specific cyclin-B2 OS=Homo sapiens GN=CCNB2 PE=1 SV=1	D.NAYTSSQI.R	FALSE	8	O95067	CCNB2	class I	AML14_DCB
1834		>sp|O95067|CCNB2_HUMAN G2/mitotic-specific cyclin-B2 OS=Homo sapiens GN=CCNB2 PE=1 SV=1	H.TLAKYLMEL.T	FALSE	9	O95067	CCNB2	class I	AML14_DCB
1835		>sp|O95067|CCNB2_HUMAN G2/mitotic-specific cyclin-B2 OS=Homo sapiens GN=CCNB2 PE=1 SV=1	H.TLAKYLMEL.T	FALSE	9	O95067	CCNB2	class I	AML14_DCB
1836		>sp|O95067|CCNB2_HUMAN G2/mitotic-specific cyclin-B2 OS=Homo sapiens GN=CCNB2 PE=1 SV=1	V.HYHPSKVAA.A	FALSE	9	O95067	CCNB2	class I	AML14_DCB
1837		>sp|Q9UI12|VATH_HUMAN V-type proton ATPase subunit H OS=Homo sapiens GN=ATP6V1H PE=1 SV=1	A.RIIAKLAAW.G	FALSE	9	Q9UI12	ATP6V1H	class I	AML14_DCB
1838		>sp|Q9UI12|VATH_HUMAN V-type proton ATPase subunit H OS=Homo sapiens GN=ATP6V1H PE=1 SV=1	A.RIIAKLAAW.G	FALSE	9	Q9UI12	ATP6V1H	class I	AML14_DCB
1839		>sp|Q9UI12|VATH_HUMAN V-type proton ATPase subunit H OS=Homo sapiens GN=ATP6V1H PE=1 SV=1	A.RIIAKLAAW.G	FALSE	9	Q9UI12	ATP6V1H	class I	AML14_DCB
1840		>sp|Q9UI12|VATH_HUMAN V-type proton ATPase subunit H OS=Homo sapiens GN=ATP6V1H PE=1 SV=1	A.RIIAKLAAW.G	FALSE	9	Q9UI12	ATP6V1H	class I	AML14_DCB
1841		>sp|Q9UI12|VATH_HUMAN V-type proton ATPase subunit H OS=Homo sapiens GN=ATP6V1H PE=1 SV=1	L.RVNEYRFAW.V	FALSE	9	Q9UI12	ATP6V1H	class I	AML14_DCB
1842		>sp|Q9UI12|VATH_HUMAN V-type proton ATPase subunit H OS=Homo sapiens GN=ATP6V1H PE=1 SV=1	L.RVNEYRFAW.V	FALSE	9	Q9UI12	ATP6V1H	class I	AML14_DCB
1843		>sp|Q9UI12|VATH_HUMAN V-type proton ATPase subunit H OS=Homo sapiens GN=ATP6V1H PE=1 SV=1	V.RLNEKNYEL.L	FALSE	9	Q9UI12	ATP6V1H	class I	AML14_DCB
1844		>sp|Q9UI12|VATH_HUMAN V-type proton ATPase subunit H OS=Homo sapiens GN=ATP6V1H PE=1 SV=1	E.VSDDPQVL.A	FALSE	8	Q9UI12	ATP6V1H	class I	AML14_DCB
1845	.[+42]	>sp|P07910|HNRPC_HUMAN Heterogeneous nuclear ribonucleoproteins C1/C2 OS=Homo sapiens GN=HNRNPC PE=1 SV=4	M.[+42.011]ASNVTNKTD.P	FALSE	9	P07910	HNRNPC	class I	AML14_DCB
1846	.[+42]	>sp|P07910|HNRPC_HUMAN Heterogeneous nuclear ribonucleoproteins C1/C2 OS=Homo sapiens GN=HNRNPC PE=1 SV=4	M.[+42.011]ASNVTNKTD.P	FALSE	9	P07910	HNRNPC	class I	AML14_DCB
1847		>sp|P07910|HNRPC_HUMAN Heterogeneous nuclear ribonucleoproteins C1/C2 OS=Homo sapiens GN=HNRNPC PE=1 SV=4	D.SLLENLEKI.E	FALSE	9	P07910	HNRNPC	class I	AML14_DCB
1848		>sp|P07910|HNRPC_HUMAN Heterogeneous nuclear ribonucleoproteins C1/C2 OS=Homo sapiens GN=HNRNPC PE=1 SV=4	D.SLLENLEKI.E	FALSE	9	P07910	HNRNPC	class I	AML14_DCB
1849		>sp|P07910|HNRPC_HUMAN Heterogeneous nuclear ribonucleoproteins C1/C2 OS=Homo sapiens GN=HNRNPC PE=1 SV=4	K.SEEEQSSSSVK.K	FALSE	11	P07910	HNRNPC	class I	AML14_DCB
1850		>sp|O14980|XPO1_HUMAN Exportin-1 OS=Homo sapiens GN=XPO1 PE=1 SV=1	R.QLLDFSQKL.D	FALSE	9	O14980	XPO1	class I	AML14_DCB
1851		>sp|O14980|XPO1_HUMAN Exportin-1 OS=Homo sapiens GN=XPO1 PE=1 SV=1	N.KLFEFMHET.H	FALSE	9	O14980	XPO1	class I	AML14_DCB
1852		>sp|O14980|XPO1_HUMAN Exportin-1 OS=Homo sapiens GN=XPO1 PE=1 SV=1	N.KLFEFMHET.H	FALSE	9	O14980	XPO1	class I	AML14_DCB
1853		>sp|O14980|XPO1_HUMAN Exportin-1 OS=Homo sapiens GN=XPO1 PE=1 SV=1	A.VLIDYQRNV.P	FALSE	9	O14980	XPO1	class I	AML14_DCB
1854		>sp|O14980|XPO1_HUMAN Exportin-1 OS=Homo sapiens GN=XPO1 PE=1 SV=1	A.VLIDYQRNV.P	FALSE	9	O14980	XPO1	class I	AML14_DCB
1855		>sp|O14980|XPO1_HUMAN Exportin-1 OS=Homo sapiens GN=XPO1 PE=1 SV=1	A.VLIDYQRNV.P	FALSE	9	O14980	XPO1	class I	AML14_DCB
1856		>sp|Q969N2|PIGT_HUMAN GPI transamidase component PIG-T OS=Homo sapiens GN=PIGT PE=1 SV=1	A.ATFQFRTRW.D	FALSE	9	Q969N2	PIGT	class I	AML14_DCB
1857		>sp|Q969N2|PIGT_HUMAN GPI transamidase component PIG-T OS=Homo sapiens GN=PIGT PE=1 SV=1	A.ATFQFRTRW.D	FALSE	9	Q969N2	PIGT	class I	AML14_DCB
1858		>sp|Q969N2|PIGT_HUMAN GPI transamidase component PIG-T OS=Homo sapiens GN=PIGT PE=1 SV=1	D.VILGTRKTY.A	FALSE	9	Q969N2	PIGT	class I	AML14_DCB
1859		>sp|Q969N2|PIGT_HUMAN GPI transamidase component PIG-T OS=Homo sapiens GN=PIGT PE=1 SV=1	D.VILGTRKTY.A	FALSE	9	Q969N2	PIGT	class I	AML14_DCB
1860		>sp|Q969N2|PIGT_HUMAN GPI transamidase component PIG-T OS=Homo sapiens GN=PIGT PE=1 SV=1	T.HPYRAFPVL.L	FALSE	9	Q969N2	PIGT	class I	AML14_DCB
1861		>sp|Q969N2|PIGT_HUMAN GPI transamidase component PIG-T OS=Homo sapiens GN=PIGT PE=1 SV=1	Q.LPANSVTKV.S	FALSE	9	Q969N2	PIGT	class I	AML14_DCB
1862		>sp|Q969N2|PIGT_HUMAN GPI transamidase component PIG-T OS=Homo sapiens GN=PIGT PE=1 SV=1	V.RLYTEPLLV.N	FALSE	9	Q969N2	PIGT	class I	AML14_DCB
1863		>sp|Q12905|ILF2_HUMAN Interleukin enhancer-binding factor 2 OS=Homo sapiens GN=ILF2 PE=1 SV=2	L.IVAPGTFEV.Q	FALSE	9	Q12905	ILF2	class I	AML14_DCB
1864		>sp|Q12905|ILF2_HUMAN Interleukin enhancer-binding factor 2 OS=Homo sapiens GN=ILF2 PE=1 SV=2	E.VQIEEVRQV.G	FALSE	9	Q12905	ILF2	class I	AML14_DCB
1865		>sp|Q12905|ILF2_HUMAN Interleukin enhancer-binding factor 2 OS=Homo sapiens GN=ILF2 PE=1 SV=2	L.KILPTLEAV.A	FALSE	9	Q12905	ILF2	class I	AML14_DCB
1866		>sp|Q12905|ILF2_HUMAN Interleukin enhancer-binding factor 2 OS=Homo sapiens GN=ILF2 PE=1 SV=2	L.KILPTLEAV.A	FALSE	9	Q12905	ILF2	class I	AML14_DCB
1867		>sp|Q12905|ILF2_HUMAN Interleukin enhancer-binding factor 2 OS=Homo sapiens GN=ILF2 PE=1 SV=2	L.KILPTLEAV.A	FALSE	9	Q12905	ILF2	class I	AML14_DCB
1868		>sp|Q5VTR2|BRE1A_HUMAN E3 ubiquitin-protein ligase BRE1A OS=Homo sapiens GN=RNF20 PE=1 SV=2	D.KLQEKVELL.S	FALSE	9	Q5VTR2	RNF20	class I	AML14_DCB
1869		>sp|Q5VTR2|BRE1A_HUMAN E3 ubiquitin-protein ligase BRE1A OS=Homo sapiens GN=RNF20 PE=1 SV=2	S.SLYGGTITI.N	FALSE	9	Q5VTR2	RNF20	class I	AML14_DCB
1870		>sp|Q5VTR2|BRE1A_HUMAN E3 ubiquitin-protein ligase BRE1A OS=Homo sapiens GN=RNF20 PE=1 SV=2	S.SLYGGTITI.N	FALSE	9	Q5VTR2	RNF20	class I	AML14_DCB
1871		>sp|Q5VTR2|BRE1A_HUMAN E3 ubiquitin-protein ligase BRE1A OS=Homo sapiens GN=RNF20 PE=1 SV=2	A.HLDEARTLL.H	FALSE	9	Q5VTR2	RNF20	class I	AML14_DCB
1872		>sp|Q5VTR2|BRE1A_HUMAN E3 ubiquitin-protein ligase BRE1A OS=Homo sapiens GN=RNF20 PE=1 SV=2	S.SLQNHNHQL.K	FALSE	9	Q5VTR2	RNF20	class I	AML14_DCB
1873		>sp|Q5VTR2|BRE1A_HUMAN E3 ubiquitin-protein ligase BRE1A OS=Homo sapiens GN=RNF20 PE=1 SV=2	E.DALRKIRAV.E	FALSE	9	Q5VTR2	RNF20	class I	AML14_DCB
1874		>sp|O14579|COPE_HUMAN Coatomer subunit epsilon OS=Homo sapiens GN=COPE PE=1 SV=3	I.YLHDQNPDA.A	FALSE	9	O14579	COPE	class I	AML14_DCB
1875		>sp|O14579|COPE_HUMAN Coatomer subunit epsilon OS=Homo sapiens GN=COPE PE=1 SV=3	I.YLHDQNPDAAL.R	FALSE	11	O14579	COPE	class I	AML14_DCB
1876		>sp|O14579|COPE_HUMAN Coatomer subunit epsilon OS=Homo sapiens GN=COPE PE=1 SV=3	I.YLHDQNPDAAL.R	FALSE	11	O14579	COPE	class I	AML14_DCB
1877		>sp|O14579|COPE_HUMAN Coatomer subunit epsilon OS=Homo sapiens GN=COPE PE=1 SV=3	K.DAHRSHPFI.K	FALSE	9	O14579	COPE	class I	AML14_DCB
1878		>sp|O14579|COPE_HUMAN Coatomer subunit epsilon OS=Homo sapiens GN=COPE PE=1 SV=3	K.DAHRSHPFI.K	FALSE	9	O14579	COPE	class I	AML14_DCB
1879		>sp|O14579|COPE_HUMAN Coatomer subunit epsilon OS=Homo sapiens GN=COPE PE=1 SV=3	K.DAHRSHPFI.K	FALSE	9	O14579	COPE	class I	AML14_DCB
1880		>sp|O14579|COPE_HUMAN Coatomer subunit epsilon OS=Homo sapiens GN=COPE PE=1 SV=3	K.DAHRSHPFI.K	FALSE	9	O14579	COPE	class I	AML14_DCB
1881		>sp|O14579|COPE_HUMAN Coatomer subunit epsilon OS=Homo sapiens GN=COPE PE=1 SV=3	K.DAHRSHPFI.K	FALSE	9	O14579	COPE	class I	AML14_DCB
1882		>sp|O14579|COPE_HUMAN Coatomer subunit epsilon OS=Homo sapiens GN=COPE PE=1 SV=3	K.DAHRSHPFI.K	FALSE	9	O14579	COPE	class I	AML14_DCB
1883		>sp|Q86UX7|URP2_HUMAN Fermitin family homolog 3 OS=Homo sapiens GN=FERMT3 PE=1 SV=1	G.VLLKIVEQI.N	FALSE	9	Q86UX7	FERMT3	class I	AML14_DCB
1884		>sp|Q86UX7|URP2_HUMAN Fermitin family homolog 3 OS=Homo sapiens GN=FERMT3 PE=1 SV=1	K.RQWLLQTHW.T	FALSE	9	Q86UX7	FERMT3	class I	AML14_DCB
1885		>sp|Q86UX7|URP2_HUMAN Fermitin family homolog 3 OS=Homo sapiens GN=FERMT3 PE=1 SV=1	V.ALSNLEVKL.E	FALSE	9	Q86UX7	FERMT3	class I	AML14_DCB
1886		>sp|Q86UX7|URP2_HUMAN Fermitin family homolog 3 OS=Homo sapiens GN=FERMT3 PE=1 SV=1	V.ALSNLEVKL.E	FALSE	9	Q86UX7	FERMT3	class I	AML14_DCB
1887		>sp|Q86UX7|URP2_HUMAN Fermitin family homolog 3 OS=Homo sapiens GN=FERMT3 PE=1 SV=1	V.ALSNLEVKL.E	FALSE	9	Q86UX7	FERMT3	class I	AML14_DCB
1888		>sp|Q96CW1|AP2M1_HUMAN AP-2 complex subunit mu OS=Homo sapiens GN=AP2M1 PE=1 SV=2	K.GEVLISRVY.R	FALSE	9	Q96CW1	AP2M1	class I	AML14_DCB
1889		>sp|Q96CW1|AP2M1_HUMAN AP-2 complex subunit mu OS=Homo sapiens GN=AP2M1 PE=1 SV=2	V.DAFRVNVI.H	FALSE	8	Q96CW1	AP2M1	class I	AML14_DCB
1890		>sp|Q96CW1|AP2M1_HUMAN AP-2 complex subunit mu OS=Homo sapiens GN=AP2M1 PE=1 SV=2	V.DAFRVNVI.H	FALSE	8	Q96CW1	AP2M1	class I	AML14_DCB
1891		>sp|Q96CW1|AP2M1_HUMAN AP-2 complex subunit mu OS=Homo sapiens GN=AP2M1 PE=1 SV=2	V.DAFRVNVI.H	FALSE	8	Q96CW1	AP2M1	class I	AML14_DCB
1892		>sp|Q96CW1|AP2M1_HUMAN AP-2 complex subunit mu OS=Homo sapiens GN=AP2M1 PE=1 SV=2	V.DAFRVNVI.H	FALSE	8	Q96CW1	AP2M1	class I	AML14_DCB
1893		>sp|Q96CW1|AP2M1_HUMAN AP-2 complex subunit mu OS=Homo sapiens GN=AP2M1 PE=1 SV=2	V.DAFRVNVI.H	FALSE	8	Q96CW1	AP2M1	class I	AML14_DCB
1894		>sp|Q96CW1|AP2M1_HUMAN AP-2 complex subunit mu OS=Homo sapiens GN=AP2M1 PE=1 SV=2	I.LPFRVIPLV.R	FALSE	9	Q96CW1	AP2M1	class I	AML14_DCB
1895		>sp|Q96CW1|AP2M1_HUMAN AP-2 complex subunit mu OS=Homo sapiens GN=AP2M1 PE=1 SV=2	E.VPFAPSGL.K	FALSE	8	Q96CW1	AP2M1	class I	AML14_DCB
1896		>sp|P23246|SFPQ_HUMAN Splicing factor, proline- and glutamine-rich OS=Homo sapiens GN=SFPQ PE=1 SV=2	E.DEFKRLFAKY.G	FALSE	10	P23246	SFPQ	class I	AML14_DCB
1897		>sp|P23246|SFPQ_HUMAN Splicing factor, proline- and glutamine-rich OS=Homo sapiens GN=SFPQ PE=1 SV=2	R.ALAEIAKAEL.D	FALSE	10	P23246	SFPQ	class I	AML14_DCB
1898		>sp|P23246|SFPQ_HUMAN Splicing factor, proline- and glutamine-rich OS=Homo sapiens GN=SFPQ PE=1 SV=2	R.ALAEIAKAEL.D	FALSE	10	P23246	SFPQ	class I	AML14_DCB
1899		>sp|P23246|SFPQ_HUMAN Splicing factor, proline- and glutamine-rich OS=Homo sapiens GN=SFPQ PE=1 SV=2	R.ALAEIAKAEL.D	FALSE	10	P23246	SFPQ	class I	AML14_DCB
1900		>sp|P23246|SFPQ_HUMAN Splicing factor, proline- and glutamine-rich OS=Homo sapiens GN=SFPQ PE=1 SV=2	T.FEYEYSQRW.K	FALSE	9	P23246	SFPQ	class I	AML14_DCB
1901		>sp|Q99741|CDC6_HUMAN Cell division control protein 6 homolog OS=Homo sapiens GN=CDC6 PE=1 SV=1	S.DAKLEPTNV.Q	FALSE	9	Q99741	CDC6	class I	AML14_DCB
1902		>sp|Q99741|CDC6_HUMAN Cell division control protein 6 homolog OS=Homo sapiens GN=CDC6 PE=1 SV=1	S.DAKLEPTNV.Q	FALSE	9	Q99741	CDC6	class I	AML14_DCB
1903		>sp|Q99741|CDC6_HUMAN Cell division control protein 6 homolog OS=Homo sapiens GN=CDC6 PE=1 SV=1	T.ILQDRLNQV.S	FALSE	9	Q99741	CDC6	class I	AML14_DCB
1904		>sp|Q99741|CDC6_HUMAN Cell division control protein 6 homolog OS=Homo sapiens GN=CDC6 PE=1 SV=1	T.ILQDRLNQV.S	FALSE	9	Q99741	CDC6	class I	AML14_DCB
1905		>sp|Q99741|CDC6_HUMAN Cell division control protein 6 homolog OS=Homo sapiens GN=CDC6 PE=1 SV=1	S.FPLQQKILV.C	FALSE	9	Q99741	CDC6	class I	AML14_DCB
1906		>sp|P26358-2|DNMT1_HUMAN Isoform 2 of DNA (cytosine-5)-methyltransferase 1 OS=Homo sapiens GN=DNMT1	K.SLLNKDLSL.E	FALSE	9	P26358-2	DNMT1	class I	AML14_DCB
1907		>sp|P26358-2|DNMT1_HUMAN Isoform 2 of DNA (cytosine-5)-methyltransferase 1 OS=Homo sapiens GN=DNMT1	R.DPPASASQV.T	FALSE	9	P26358-2	DNMT1	class I	AML14_DCB
1908		>sp|P26358-2|DNMT1_HUMAN Isoform 2 of DNA (cytosine-5)-methyltransferase 1 OS=Homo sapiens GN=DNMT1	T.GLIEKNIEL.F	FALSE	9	P26358-2	DNMT1	class I	AML14_DCB
1909		>sp|P26358-2|DNMT1_HUMAN Isoform 2 of DNA (cytosine-5)-methyltransferase 1 OS=Homo sapiens GN=DNMT1	T.GLIEKNIEL.F	FALSE	9	P26358-2	DNMT1	class I	AML14_DCB
1910		>sp|P26358-2|DNMT1_HUMAN Isoform 2 of DNA (cytosine-5)-methyltransferase 1 OS=Homo sapiens GN=DNMT1	T.GLIEKNIEL.F	FALSE	9	P26358-2	DNMT1	class I	AML14_DCB
1911		>sp|P26358-2|DNMT1_HUMAN Isoform 2 of DNA (cytosine-5)-methyltransferase 1 OS=Homo sapiens GN=DNMT1	F.GLMQEKIYI.S	FALSE	9	P26358-2	DNMT1	class I	AML14_DCB
1912	M[+16]	>sp|P26358-2|DNMT1_HUMAN Isoform 2 of DNA (cytosine-5)-methyltransferase 1 OS=Homo sapiens GN=DNMT1	F.GLM[+15.995]QEKIYI.S	FALSE	9	P26358-2	DNMT1	class I	AML14_DCB
1913		>sp|P26358-2|DNMT1_HUMAN Isoform 2 of DNA (cytosine-5)-methyltransferase 1 OS=Homo sapiens GN=DNMT1	K.KQNKNRISW.V	FALSE	9	P26358-2	DNMT1	class I	AML14_DCB
1914		>sp|P67809|YBOX1_HUMAN Nuclease-sensitive element-binding protein 1 OS=Homo sapiens GN=YBX1 PE=1 SV=3	R.SVGDGETVEFDVVEGEK.G	FALSE	17	P67809	YBX1	class I	AML14_DCB
1915		>sp|P67809|YBOX1_HUMAN Nuclease-sensitive element-binding protein 1 OS=Homo sapiens GN=YBX1 PE=1 SV=3	S.VGDGETVEF.D	FALSE	9	P67809	YBX1	class I	AML14_DCB
1916		>sp|P67809|YBOX1_HUMAN Nuclease-sensitive element-binding protein 1 OS=Homo sapiens GN=YBX1 PE=1 SV=3	D.PPAENSSAPEAEQGGAE.-	FALSE	17	P67809	YBX1	class I	AML14_DCB
1917		>sp|P67809|YBOX1_HUMAN Nuclease-sensitive element-binding protein 1 OS=Homo sapiens GN=YBX1 PE=1 SV=3	D.PPAENSSAPEAEQGGAE.-	FALSE	17	P67809	YBX1	class I	AML14_DCB
1918		>sp|O15169|AXIN1_HUMAN Axin-1 OS=Homo sapiens GN=AXIN1 PE=1 SV=2	S.ILDEHVQRV.L	FALSE	9	O15169	AXIN1	class I	AML14_DCB
1919		>sp|O15169|AXIN1_HUMAN Axin-1 OS=Homo sapiens GN=AXIN1 PE=1 SV=2	S.ILDEHVQRV.L	FALSE	9	O15169	AXIN1	class I	AML14_DCB
1920		>sp|O15169|AXIN1_HUMAN Axin-1 OS=Homo sapiens GN=AXIN1 PE=1 SV=2	S.ILDEHVQRV.L	FALSE	9	O15169	AXIN1	class I	AML14_DCB
1921		>sp|O15169|AXIN1_HUMAN Axin-1 OS=Homo sapiens GN=AXIN1 PE=1 SV=2	I.LDEHVQRV.L	FALSE	8	O15169	AXIN1	class I	AML14_DCB
1922		>sp|Q96RL7|VP13A_HUMAN Vacuolar protein sorting-associated protein 13A OS=Homo sapiens GN=VPS13A PE=1 SV=2	Q.KVLDLKINL.K	FALSE	9	Q96RL7	VPS13A	class I	AML14_DCB
1923		>sp|Q96RL7|VP13A_HUMAN Vacuolar protein sorting-associated protein 13A OS=Homo sapiens GN=VPS13A PE=1 SV=2	Q.KVLDLKINL.K	FALSE	9	Q96RL7	VPS13A	class I	AML14_DCB
1924		>sp|Q96RL7|VP13A_HUMAN Vacuolar protein sorting-associated protein 13A OS=Homo sapiens GN=VPS13A PE=1 SV=2	Q.ALAEATVQA.A	FALSE	9	Q96RL7	VPS13A	class I	AML14_DCB
1925		>sp|Q96RL7|VP13A_HUMAN Vacuolar protein sorting-associated protein 13A OS=Homo sapiens GN=VPS13A PE=1 SV=2	L.LPYKIAYYI.E	FALSE	9	Q96RL7	VPS13A	class I	AML14_DCB
1926		>sp|Q96RL7|VP13A_HUMAN Vacuolar protein sorting-associated protein 13A OS=Homo sapiens GN=VPS13A PE=1 SV=2	L.AEHSTVITF.L	FALSE	9	Q96RL7	VPS13A	class I	AML14_DCB
1927		>sp|P26641|EF1G_HUMAN Elongation factor 1-gamma OS=Homo sapiens GN=EEF1G PE=1 SV=3	K.ALIAAQYSGAQVR.V	FALSE	13	P26641	EEF1G	class I	AML14_DCB
1928		>sp|P26641|EF1G_HUMAN Elongation factor 1-gamma OS=Homo sapiens GN=EEF1G PE=1 SV=3	I.AYYVSNEEL.R	FALSE	9	P26641	EEF1G	class I	AML14_DCB
1929		>sp|P26641|EF1G_HUMAN Elongation factor 1-gamma OS=Homo sapiens GN=EEF1G PE=1 SV=3	I.AYYVSNEEL.R	FALSE	9	P26641	EEF1G	class I	AML14_DCB
1930		>sp|P26641|EF1G_HUMAN Elongation factor 1-gamma OS=Homo sapiens GN=EEF1G PE=1 SV=3	I.AYYVSNEEL.R	FALSE	9	P26641	EEF1G	class I	AML14_DCB
1931		>sp|P26641|EF1G_HUMAN Elongation factor 1-gamma OS=Homo sapiens GN=EEF1G PE=1 SV=3	T.FLVGERVTL.A	FALSE	9	P26641	EEF1G	class I	AML14_DCB
1932		>sp|P26641|EF1G_HUMAN Elongation factor 1-gamma OS=Homo sapiens GN=EEF1G PE=1 SV=3	G.AFQHVGKAF.N	FALSE	9	P26641	EEF1G	class I	AML14_DCB
1933		>sp|P26641|EF1G_HUMAN Elongation factor 1-gamma OS=Homo sapiens GN=EEF1G PE=1 SV=3	G.AFQHVGKAF.N	FALSE	9	P26641	EEF1G	class I	AML14_DCB
1934		>sp|P26641|EF1G_HUMAN Elongation factor 1-gamma OS=Homo sapiens GN=EEF1G PE=1 SV=3	G.AFQHVGKAF.N	FALSE	9	P26641	EEF1G	class I	AML14_DCB
1935		>sp|Q14240|IF4A2_HUMAN Eukaryotic initiation factor 4A-II OS=Homo sapiens GN=EIF4A2 PE=1 SV=2	G.KTATFAISI.L	FALSE	9	Q14240	EIF4A2	class I	AML14_DCB
1936		>sp|Q14240|IF4A2_HUMAN Eukaryotic initiation factor 4A-II OS=Homo sapiens GN=EIF4A2 PE=1 SV=2	G.KTATFAISI.L	FALSE	9	Q14240	EIF4A2	class I	AML14_DCB
1937		>sp|Q14240|IF4A2_HUMAN Eukaryotic initiation factor 4A-II OS=Homo sapiens GN=EIF4A2 PE=1 SV=2	G.KTATFAISI.L	FALSE	9	Q14240	EIF4A2	class I	AML14_DCB
1938		>sp|Q14240|IF4A2_HUMAN Eukaryotic initiation factor 4A-II OS=Homo sapiens GN=EIF4A2 PE=1 SV=2	E.KMHARDFTV.S	FALSE	9	Q14240	EIF4A2	class I	AML14_DCB
1939		>sp|Q14240|IF4A2_HUMAN Eukaryotic initiation factor 4A-II OS=Homo sapiens GN=EIF4A2 PE=1 SV=2	E.KMHARDFTV.S	FALSE	9	Q14240	EIF4A2	class I	AML14_DCB
1940	M[+16]	>sp|Q14240|IF4A2_HUMAN Eukaryotic initiation factor 4A-II OS=Homo sapiens GN=EIF4A2 PE=1 SV=2	E.KM[+15.995]HARDFTV.S	FALSE	9	Q14240	EIF4A2	class I	AML14_DCB
1941		>sp|P13747|HLAE_HUMAN HLA class I histocompatibility antigen, alpha chain E OS=Homo sapiens GN=HLA-E PE=1 SV=3	N.DAASPRMV.P	FALSE	8	P13747	HLA-E	class I	AML14_DCB
1942		>sp|P13747|HLAE_HUMAN HLA class I histocompatibility antigen, alpha chain E OS=Homo sapiens GN=HLA-E PE=1 SV=3	Q.FAYDGKDYL.T	FALSE	9	P13747	HLA-E	class I	AML14_DCB
1943		>sp|P13747|HLAE_HUMAN HLA class I histocompatibility antigen, alpha chain E OS=Homo sapiens GN=HLA-E PE=1 SV=3	A.SEAEHQRAY.L	FALSE	9	P13747	HLA-E	class I	AML14_DCB
1944		>sp|P13747|HLAE_HUMAN HLA class I histocompatibility antigen, alpha chain E OS=Homo sapiens GN=HLA-E PE=1 SV=3	A.SEAEHQRAY.L	FALSE	9	P13747	HLA-E	class I	AML14_DCB
1945		>sp|P13747|HLAE_HUMAN HLA class I histocompatibility antigen, alpha chain E OS=Homo sapiens GN=HLA-E PE=1 SV=3	A.SEAEHQRAY.L	FALSE	9	P13747	HLA-E	class I	AML14_DCB
1946		>sp|P13747|HLAE_HUMAN HLA class I histocompatibility antigen, alpha chain E OS=Homo sapiens GN=HLA-E PE=1 SV=3	W.SDSAQGSESHSL.-	FALSE	12	P13747	HLA-E	class I	AML14_DCB
1947		>sp|P32519|ELF1_HUMAN ETS-related transcription factor Elf-1 OS=Homo sapiens GN=ELF1 PE=1 SV=2	M.NYETMGRAL.R	FALSE	9	P32519	ELF1	class I	AML14_DCB
1948		>sp|P32519|ELF1_HUMAN ETS-related transcription factor Elf-1 OS=Homo sapiens GN=ELF1 PE=1 SV=2	M.NYETMGRAL.R	FALSE	9	P32519	ELF1	class I	AML14_DCB
1949		>sp|P32519|ELF1_HUMAN ETS-related transcription factor Elf-1 OS=Homo sapiens GN=ELF1 PE=1 SV=2	E.TMGRALRYYY.Q	FALSE	10	P32519	ELF1	class I	AML14_DCB
1950		>sp|P32519|ELF1_HUMAN ETS-related transcription factor Elf-1 OS=Homo sapiens GN=ELF1 PE=1 SV=2	P.YPTQLFRTV.H	FALSE	9	P32519	ELF1	class I	AML14_DCB
1951		>sp|P32519|ELF1_HUMAN ETS-related transcription factor Elf-1 OS=Homo sapiens GN=ELF1 PE=1 SV=2	P.YPTQLFRTV.H	FALSE	9	P32519	ELF1	class I	AML14_DCB
1952		>sp|P32519|ELF1_HUMAN ETS-related transcription factor Elf-1 OS=Homo sapiens GN=ELF1 PE=1 SV=2	Q.VLTSNVQTI.C	FALSE	9	P32519	ELF1	class I	AML14_DCB
1953		>sp|P32519|ELF1_HUMAN ETS-related transcription factor Elf-1 OS=Homo sapiens GN=ELF1 PE=1 SV=2	Q.VLTSNVQTI.C	FALSE	9	P32519	ELF1	class I	AML14_DCB
1954		>sp|Q15029|U5S1_HUMAN 116 kDa U5 small nuclear ribonucleoprotein component OS=Homo sapiens GN=EFTUD2 PE=1 SV=1	T.DAYYKLRHI.V	FALSE	9	Q15029	EFTUD2	class I	AML14_DCB
1955		>sp|Q15029|U5S1_HUMAN 116 kDa U5 small nuclear ribonucleoprotein component OS=Homo sapiens GN=EFTUD2 PE=1 SV=1	T.DAYYKLRHI.V	FALSE	9	Q15029	EFTUD2	class I	AML14_DCB
1956		>sp|Q15029|U5S1_HUMAN 116 kDa U5 small nuclear ribonucleoprotein component OS=Homo sapiens GN=EFTUD2 PE=1 SV=1	S.YPSLTTKV.E	FALSE	8	Q15029	EFTUD2	class I	AML14_DCB
1957		>sp|Q15029|U5S1_HUMAN 116 kDa U5 small nuclear ribonucleoprotein component OS=Homo sapiens GN=EFTUD2 PE=1 SV=1	C.VMHDLRKMY.S	FALSE	9	Q15029	EFTUD2	class I	AML14_DCB
1958		>sp|Q15029|U5S1_HUMAN 116 kDa U5 small nuclear ribonucleoprotein component OS=Homo sapiens GN=EFTUD2 PE=1 SV=1	C.VMHDLRKMY.S	FALSE	9	Q15029	EFTUD2	class I	AML14_DCB
1959		>sp|Q15029|U5S1_HUMAN 116 kDa U5 small nuclear ribonucleoprotein component OS=Homo sapiens GN=EFTUD2 PE=1 SV=1	G.DPLDKSIVI.R	FALSE	9	Q15029	EFTUD2	class I	AML14_DCB
1960		>sp|Q04446|GLGB_HUMAN 1,4-alpha-glucan-branching enzyme OS=Homo sapiens GN=GBE1 PE=1 SV=3	A.RLLEIDPYL.K	FALSE	9	Q04446	GBE1	class I	AML14_DCB
1961		>sp|Q04446|GLGB_HUMAN 1,4-alpha-glucan-branching enzyme OS=Homo sapiens GN=GBE1 PE=1 SV=3	L.RIYESHVGI.S	FALSE	9	Q04446	GBE1	class I	AML14_DCB
1962		>sp|Q04446|GLGB_HUMAN 1,4-alpha-glucan-branching enzyme OS=Homo sapiens GN=GBE1 PE=1 SV=3	L.RIYESHVGI.S	FALSE	9	Q04446	GBE1	class I	AML14_DCB
1963		>sp|Q04446|GLGB_HUMAN 1,4-alpha-glucan-branching enzyme OS=Homo sapiens GN=GBE1 PE=1 SV=3	M.AIMEHAYYA.S	FALSE	9	Q04446	GBE1	class I	AML14_DCB
1964		>sp|Q04446|GLGB_HUMAN 1,4-alpha-glucan-branching enzyme OS=Homo sapiens GN=GBE1 PE=1 SV=3	A.AEYGGHQRL.D	FALSE	9	Q04446	GBE1	class I	AML14_DCB
1965		>sp|Q04446|GLGB_HUMAN 1,4-alpha-glucan-branching enzyme OS=Homo sapiens GN=GBE1 PE=1 SV=3	A.AEYGGHQRL.D	FALSE	9	Q04446	GBE1	class I	AML14_DCB
1966		>sp|Q9UPN7|PP6R1_HUMAN Serine/threonine-protein phosphatase 6 regulatory subunit 1 OS=Homo sapiens GN=PPP6R1 PE=1 SV=5	C.RLVERILTSW.E	FALSE	10	Q9UPN7	PPP6R1	class I	AML14_DCB
1967		>sp|Q9UPN7|PP6R1_HUMAN Serine/threonine-protein phosphatase 6 regulatory subunit 1 OS=Homo sapiens GN=PPP6R1 PE=1 SV=5	C.RLVERILTSW.E	FALSE	10	Q9UPN7	PPP6R1	class I	AML14_DCB
1968		>sp|Q9UPN7|PP6R1_HUMAN Serine/threonine-protein phosphatase 6 regulatory subunit 1 OS=Homo sapiens GN=PPP6R1 PE=1 SV=5	L.KELPSEQQEQW.E	FALSE	11	Q9UPN7	PPP6R1	class I	AML14_DCB
1969		>sp|Q9UPN7|PP6R1_HUMAN Serine/threonine-protein phosphatase 6 regulatory subunit 1 OS=Homo sapiens GN=PPP6R1 PE=1 SV=5	D.KTANITFSL.N	FALSE	9	Q9UPN7	PPP6R1	class I	AML14_DCB
1970		>sp|Q9UPN7|PP6R1_HUMAN Serine/threonine-protein phosphatase 6 regulatory subunit 1 OS=Homo sapiens GN=PPP6R1 PE=1 SV=5	D.KTANITFSL.N	FALSE	9	Q9UPN7	PPP6R1	class I	AML14_DCB
1971		>sp|Q9UPN7|PP6R1_HUMAN Serine/threonine-protein phosphatase 6 regulatory subunit 1 OS=Homo sapiens GN=PPP6R1 PE=1 SV=5	D.KTANITFSL.N	FALSE	9	Q9UPN7	PPP6R1	class I	AML14_DCB
1972		>sp|Q9UPN7|PP6R1_HUMAN Serine/threonine-protein phosphatase 6 regulatory subunit 1 OS=Homo sapiens GN=PPP6R1 PE=1 SV=5	P.TDAPTSPRV.S	FALSE	9	Q9UPN7	PPP6R1	class I	AML14_DCB
1973		>sp|Q00341|VIGLN_HUMAN Vigilin OS=Homo sapiens GN=HDLBP PE=1 SV=2	K.KTTTIAVEV.K	FALSE	9	Q00341	HDLBP	class I	AML14_DCB
1974		>sp|Q00341|VIGLN_HUMAN Vigilin OS=Homo sapiens GN=HDLBP PE=1 SV=2	E.RIREIRDKF.P	FALSE	9	Q00341	HDLBP	class I	AML14_DCB
1975		>sp|Q00341|VIGLN_HUMAN Vigilin OS=Homo sapiens GN=HDLBP PE=1 SV=2	A.GLLERVKEL.Q	FALSE	9	Q00341	HDLBP	class I	AML14_DCB
1976		>sp|Q00341|VIGLN_HUMAN Vigilin OS=Homo sapiens GN=HDLBP PE=1 SV=2	A.GLLERVKEL.Q	FALSE	9	Q00341	HDLBP	class I	AML14_DCB
1977		>sp|Q00341|VIGLN_HUMAN Vigilin OS=Homo sapiens GN=HDLBP PE=1 SV=2	A.GLLERVKELQA.E	FALSE	11	Q00341	HDLBP	class I	AML14_DCB
1978		>sp|P00558|PGK1_HUMAN Phosphoglycerate kinase 1 OS=Homo sapiens GN=PGK1 PE=1 SV=3	K.NNQITNNQR.I	FALSE	9	P00558	PGK1	class I	AML14_DCB
1979		>sp|P00558|PGK1_HUMAN Phosphoglycerate kinase 1 OS=Homo sapiens GN=PGK1 PE=1 SV=3	K.ALMDEVVKA.T	FALSE	9	P00558	PGK1	class I	AML14_DCB
1980		>sp|P00558|PGK1_HUMAN Phosphoglycerate kinase 1 OS=Homo sapiens GN=PGK1 PE=1 SV=3	K.ALMDEVVKA.T	FALSE	9	P00558	PGK1	class I	AML14_DCB
1981		>sp|P00558|PGK1_HUMAN Phosphoglycerate kinase 1 OS=Homo sapiens GN=PGK1 PE=1 SV=3	K.ALMDEVVKA.T	FALSE	9	P00558	PGK1	class I	AML14_DCB
1982	M[+16]	>sp|P00558|PGK1_HUMAN Phosphoglycerate kinase 1 OS=Homo sapiens GN=PGK1 PE=1 SV=3	K.ALM[+15.995]DEVVKA.T	FALSE	9	P00558	PGK1	class I	AML14_DCB
1983	M[+16]	>sp|P00558|PGK1_HUMAN Phosphoglycerate kinase 1 OS=Homo sapiens GN=PGK1 PE=1 SV=3	K.ALM[+15.995]DEVVKA.T	FALSE	9	P00558	PGK1	class I	AML14_DCB
1984		>sp|O43390|HNRPR_HUMAN Heterogeneous nuclear ribonucleoprotein R OS=Homo sapiens GN=HNRNPR PE=1 SV=1	K.EAAQEAVK.L	FALSE	8	O43390	HNRNPR	class I	AML14_DCB
1985		>sp|O43390|HNRPR_HUMAN Heterogeneous nuclear ribonucleoprotein R OS=Homo sapiens GN=HNRNPR PE=1 SV=1	R.RLMSGKVKVW.G	FALSE	10	O43390	HNRNPR	class I	AML14_DCB
1986		>sp|O43390|HNRPR_HUMAN Heterogeneous nuclear ribonucleoprotein R OS=Homo sapiens GN=HNRNPR PE=1 SV=1	V.KVWGNVVTV.E	FALSE	9	O43390	HNRNPR	class I	AML14_DCB
1987		>sp|O43390|HNRPR_HUMAN Heterogeneous nuclear ribonucleoprotein R OS=Homo sapiens GN=HNRNPR PE=1 SV=1	Y.QDTYGQQWK.-	FALSE	9	O43390	HNRNPR	class I	AML14_DCB
1988		>sp|Q00610|CLH1_HUMAN Clathrin heavy chain 1 OS=Homo sapiens GN=CLTC PE=1 SV=5	D.FVHDLVLYL.Y	FALSE	9	Q00610	CLTC	class I	AML14_DCB
1989		>sp|Q00610|CLH1_HUMAN Clathrin heavy chain 1 OS=Homo sapiens GN=CLTC PE=1 SV=5	D.FVHDLVLYL.Y	FALSE	9	Q00610	CLTC	class I	AML14_DCB
1990		>sp|Q00610|CLH1_HUMAN Clathrin heavy chain 1 OS=Homo sapiens GN=CLTC PE=1 SV=5	D.FVHDLVLYL.Y	FALSE	9	Q00610	CLTC	class I	AML14_DCB
1991		>sp|Q00610|CLH1_HUMAN Clathrin heavy chain 1 OS=Homo sapiens GN=CLTC PE=1 SV=5	T.RVMEYINRL.D	FALSE	9	Q00610	CLTC	class I	AML14_DCB
1992	M[+16]	>sp|Q00610|CLH1_HUMAN Clathrin heavy chain 1 OS=Homo sapiens GN=CLTC PE=1 SV=5	T.RVM[+15.995]EYINRL.D	FALSE	9	Q00610	CLTC	class I	AML14_DCB
1993		>sp|Q00610|CLH1_HUMAN Clathrin heavy chain 1 OS=Homo sapiens GN=CLTC PE=1 SV=5	G.RLASTLVHL.G	FALSE	9	Q00610	CLTC	class I	AML14_DCB
1994		>sp|Q15833|STXB2_HUMAN Syntaxin-binding protein 2 OS=Homo sapiens GN=STXBP2 PE=1 SV=2	D.ILAEGITIV.E	FALSE	9	Q15833	STXBP2	class I	AML14_DCB
1995		>sp|Q15833|STXB2_HUMAN Syntaxin-binding protein 2 OS=Homo sapiens GN=STXBP2 PE=1 SV=2	N.KYSTHLHL.A	FALSE	8	Q15833	STXBP2	class I	AML14_DCB
1996		>sp|Q15833|STXB2_HUMAN Syntaxin-binding protein 2 OS=Homo sapiens GN=STXBP2 PE=1 SV=2	N.KYSTHLHL.A	FALSE	8	Q15833	STXBP2	class I	AML14_DCB
1997		>sp|Q15833|STXB2_HUMAN Syntaxin-binding protein 2 OS=Homo sapiens GN=STXBP2 PE=1 SV=2	S.SLIRNLEQL.G	FALSE	9	Q15833	STXBP2	class I	AML14_DCB
1998		>sp|Q15833|STXB2_HUMAN Syntaxin-binding protein 2 OS=Homo sapiens GN=STXBP2 PE=1 SV=2	S.SLIRNLEQL.G	FALSE	9	Q15833	STXBP2	class I	AML14_DCB
[truncated: 109,434 more rows]

## Sheet: PhosphopeptidesOnly
	Modification Type(s)	Protein Name	peptide	phosphopeptide	length	Uniprot	HGNC	class	sample
3354	S[+80]	>sp|Q9BZD4|NUF2_HUMAN Kinetochore protein Nuf2 OS=Homo sapiens GN=NUF2 PE=1 SV=2	K.IVDS[+79.966]PEKL.K	TRUE	8	Q9BZD4	NUF2	class I	AML14_DCB
3355	S[+80]	>sp|Q9BZD4|NUF2_HUMAN Kinetochore protein Nuf2 OS=Homo sapiens GN=NUF2 PE=1 SV=2	K.IVDS[+79.966]PEKL.K	TRUE	8	Q9BZD4	NUF2	class I	AML14_DCB
6732	M[+16], S[+80]	>sp|Q6ZTQ3|RASF6_HUMAN Ras association domain-containing protein 6 OS=Homo sapiens (Human) OX=9606 GN=RASSF6 PE=1 SV=1	Y.RTM[+15.995]S[+79.966]EAALVRK.R	TRUE	11	Q6ZTQ3	RASSF6	class I
7726	S[+80]	>sp|Q9UQ35|SRRM2_HUMAN Serine/arginine repetitive matrix protein 2 OS=Homo sapiens (Human) OX=9606 GN=SRRM2 PE=1 SV=2	D.ATAS[+79.966]PPRQK.D	TRUE	9	Q9UQ35	SRRM2	class I
7727	S[+80]	>sp|Q9UQ35|SRRM2_HUMAN Serine/arginine repetitive matrix protein 2 OS=Homo sapiens (Human) OX=9606 GN=SRRM2 PE=1 SV=2	D.ATAS[+79.966]PPRQK.D	TRUE	9	Q9UQ35	SRRM2	class I
7728	S[+80]	>sp|Q8IWI9|MGAP_HUMAN MAX gene-associated protein OS=Homo sapiens (Human) OX=9606 GN=MGA PE=1 SV=4	S.SVSS[+79.966]PVKSK.G	TRUE	9	Q8IWI9	MGA	class I
7890	S[+80]	>sp|Q8IYB3|SRRM1_HUMAN Serine/arginine repetitive matrix protein 1 OS=Homo sapiens (Human) OX=9606 GN=SRRM1 PE=1 SV=2	S.RSPS[+79.966]PAPEK.K	TRUE	9	Q8IYB3	SRRM1	class I
7892	S[+80]	>sp|Q8IYB3|SRRM1_HUMAN Serine/arginine repetitive matrix protein 1 OS=Homo sapiens (Human) OX=9606 GN=SRRM1 PE=1 SV=2	R.RTAS[+79.966]PPPPPK.R	TRUE	10	Q8IYB3	SRRM1	class I
8535	S[+80]	>sp|P49585|PCY1A_HUMAN Choline-phosphate cytidylyltransferase A OS=Homo sapiens (Human) OX=9606 GN=PCYT1A PE=1 SV=2	T.RERS[+79.966]PSPSF.R	TRUE	9	P49585	PCYT1A	class I
8770	S[+80]	>sp|Q5VYV7|SLX4I_HUMAN Protein SLX4IP OS=Homo sapiens (Human) OX=9606 GN=SLX4IP PE=1 SV=1	L.STIQNS[+79.966]PTKK.R	TRUE	10	Q5VYV7	SLX4IP	class I
8908	S[+80]	>sp|P11309|PIM1_HUMAN Serine/threonine-protein kinase pim-1 OS=Homo sapiens (Human) OX=9606 GN=PIM1 PE=1 SV=4	L.HSLS[+79.966]PGPSK.-	TRUE	9	P11309	PIM1	class I
9365	T[+80]	>sp|Q8IWJ2|GCC2_HUMAN GRIP and coiled-coil domain-containing protein 2 OS=Homo sapiens (Human) OX=9606 GN=GCC2 PE=1 SV=4	S.ELQT[+79.966]LQSEH.D	TRUE	9	Q8IWJ2	GCC2	class I
9897	S[+80]	>sp|Q13905|RPGF1_HUMAN Rap guanine nucleotide exchange factor 1 OS=Homo sapiens (Human) OX=9606 GN=RAPGEF1 PE=1 SV=3	Y.AQRRLS[+79.966]GGSHSY.G	TRUE	12	Q13905	RAPGEF1	class I
10155	S[+80]	>sp|Q9H2X6|HIPK2_HUMAN Homeodomain-interacting protein kinase 2 OS=Homo sapiens (Human) OX=9606 GN=HIPK2 PE=1 SV=2	Q.AISS[+79.966]PQRSK.R	TRUE	9	Q9H2X6	HIPK2	class I
10995	T[+80]	>sp|Q8TB73|NDNF_HUMAN Protein NDNF OS=Homo sapiens (Human) OX=9606 GN=NDNF PE=1 SV=2	Y.QSKVVKT[+79.966]RK.F	TRUE	9	Q8TB73	NDNF	class I
11128	S[+80]	>sp|Q9BXL7|CAR11_HUMAN Caspase recruitment domain-containing protein 11 OS=Homo sapiens (Human) OX=9606 GN=CARD11 PE=1 SV=3	Q.RAKS[+79.966]PISLK.R	TRUE	9	Q9BXL7	CARD11	class I
11355	S[+80]	>sp|Q9UKJ3|GPTC8_HUMAN G patch domain-containing protein 8 OS=Homo sapiens (Human) OX=9606 GN=GPATCH8 PE=1 SV=2	P.GSGS[+79.966]PAPPR.R	TRUE	9	Q9UKJ3	GPATCH8	class I
12978	T[+80]	>sp|Q9Y2X9|ZN281_HUMAN Zinc finger protein 281 OS=Homo sapiens GN=ZNF281 PE=1 SV=1	T.RVKT[+79.966]PTSQSY.R	TRUE	10	Q9Y2X9	ZNF281	class I	OCI-AML2_DMSO
13094	M[+16], S[+80]	>sp|Q68CZ2|TENS3_HUMAN Tensin-3 OS=Homo sapiens GN=TNS3 PE=1 SV=2	K.VM[+15.995]IGS[+79.966]PKKV.-	TRUE	9	Q68CZ2	TNS3	class I	OCI-AML2_DMSO
13095	M[+16], S[+80]	>sp|Q68CZ2|TENS3_HUMAN Tensin-3 OS=Homo sapiens GN=TNS3 PE=1 SV=2	K.VM[+15.995]IGS[+79.966]PKKV.-	TRUE	9	Q68CZ2	TNS3	class I	OCI-AML2_DMSO
13096	M[+16], S[+80]	>sp|Q68CZ2|TENS3_HUMAN Tensin-3 OS=Homo sapiens GN=TNS3 PE=1 SV=2	K.VM[+15.995]IGS[+79.966]PKKV.-	TRUE	9	Q68CZ2	TNS3	class I	OCI-AML2_DMSO
13810	T[+80]	>sp|Q8WUB8|PHF10_HUMAN PHD finger protein 10 OS=Homo sapiens GN=PHF10 PE=1 SV=3	Q.RAPPT[+79.966]PRKV.G	TRUE	9	Q8WUB8	PHF10	class I	OCI-AML2_DMSO
14349	T[+80]	>sp|P46013|KI67_HUMAN Antigen KI-67 OS=Homo sapiens GN=MKI67 PE=1 SV=2	R.RPQT[+79.966]PKEKA.K	TRUE	9	P46013	MKI67	class I	BLCL HD3
14350	T[+80]	>sp|P46013|KI67_HUMAN Antigen KI-67 OS=Homo sapiens GN=MKI67 PE=1 SV=2	R.RPQT[+79.966]PKEKA.K	TRUE	9	P46013	MKI67	class I	BLCL HD3
14351	T[+80]	>sp|P46013|KI67_HUMAN Antigen KI-67 OS=Homo sapiens GN=MKI67 PE=1 SV=2	R.RPQT[+79.966]PKEKA.K	TRUE	9	P46013	MKI67	class I	BLCL HD3
14505	S[+80]	>sp|P42858|HD_HUMAN Huntingtin OS=Homo sapiens GN=HTT PE=1 SV=2	S.VPLS[+79.966]PKKGSEA.S	TRUE	11	P42858	HTT	class I	BLCL HD3
14506	S[+80]	>sp|P42858|HD_HUMAN Huntingtin OS=Homo sapiens GN=HTT PE=1 SV=2	S.VPLS[+79.966]PKKGSEA.S	TRUE	11	P42858	HTT	class I	BLCL HD3
14664	S[+80]	>sp|O14497|ARI1A_HUMAN AT-rich interactive domain-containing protein 1A OS=Homo sapiens GN=ARID1A PE=1 SV=3	G.QPYGRS[+79.966]PSA.V	TRUE	9	O14497	ARID1A	class I	BLCL HD3
14671	T[+80]	>sp|O14497|ARI1A_HUMAN AT-rich interactive domain-containing protein 1A OS=Homo sapiens GN=ARID1A PE=1 SV=3	S.SPRGGT[+79.966]PGSGAAAA.A	TRUE	14	O14497	ARID1A	class I	BLCL HD3
14730	S[+80]	>sp|Q9UQ35|SRRM2_HUMAN Serine/arginine repetitive matrix protein 2 OS=Homo sapiens GN=SRRM2 PE=1 SV=2	D.ATAS[+79.966]PPRQK.D	TRUE	9	Q9UQ35	SRRM2	class I	BLCL HD3
14731	S[+80]	>sp|Q9UQ35|SRRM2_HUMAN Serine/arginine repetitive matrix protein 2 OS=Homo sapiens GN=SRRM2 PE=1 SV=2	D.ATAS[+79.966]PPRQK.D	TRUE	9	Q9UQ35	SRRM2	class I	BLCL HD3
14732	S[+80]	>sp|Q9UQ35|SRRM2_HUMAN Serine/arginine repetitive matrix protein 2 OS=Homo sapiens GN=SRRM2 PE=1 SV=2	D.ATAS[+79.966]PPRQK.D	TRUE	9	Q9UQ35	SRRM2	class I	BLCL HD3
14733	S[+80]	>sp|Q9UQ35|SRRM2_HUMAN Serine/arginine repetitive matrix protein 2 OS=Homo sapiens GN=SRRM2 PE=1 SV=2	D.ATAS[+79.966]PPRQK.D	TRUE	9	Q9UQ35	SRRM2	class I	BLCL HD3
14747	S[+80]	>sp|Q9UQ35|SRRM2_HUMAN Serine/arginine repetitive matrix protein 2 OS=Homo sapiens GN=SRRM2 PE=1 SV=2	D.QPRS[+79.966]PVPSA.F	TRUE	9	Q9UQ35	SRRM2	class I	BLCL HD3
14971	S[+80]	>sp|Q12802|AKP13_HUMAN A-kinase anchor protein 13 OS=Homo sapiens GN=AKAP13 PE=1 SV=2	L.SHSTDS[+79.966]LNKI.S	TRUE	10	Q12802	AKAP13	class I	BLCL HD3
14977	S[+80]	>sp|Q12802|AKP13_HUMAN A-kinase anchor protein 13 OS=Homo sapiens GN=AKAP13 PE=1 SV=2	R.RTES[+79.966]DSGLKK.G	TRUE	10	Q12802	AKAP13	class I	BLCL HD3
14978	S[+80]	>sp|Q12802|AKP13_HUMAN A-kinase anchor protein 13 OS=Homo sapiens GN=AKAP13 PE=1 SV=2	R.RTES[+79.966]DSGLKK.G	TRUE	10	Q12802	AKAP13	class I	BLCL HD3
14979	S[+80]	>sp|Q12802|AKP13_HUMAN A-kinase anchor protein 13 OS=Homo sapiens GN=AKAP13 PE=1 SV=2	R.RTES[+79.966]DSGLKK.G	TRUE	10	Q12802	AKAP13	class I	BLCL HD3
15753	T[+80]	>sp|P42695|CNDD3_HUMAN Condensin-2 complex subunit D3 OS=Homo sapiens GN=NCAPD3 PE=1 SV=2	I.GTPRT[+79.966]PSSAK.E	TRUE	10	P42695	NCAPD3	class I	BLCL HD3
15883	S[+80]	>sp|Q8IWI9|MGAP_HUMAN MAX gene-associated protein OS=Homo sapiens GN=MGA PE=1 SV=3	S.SVSS[+79.966]PVKSK.G	TRUE	9	Q8IWI9	MGA	class I	BLCL HD3
15884	S[+80]	>sp|Q8IWI9|MGAP_HUMAN MAX gene-associated protein OS=Homo sapiens GN=MGA PE=1 SV=3	S.SVSS[+79.966]PVKSK.G	TRUE	9	Q8IWI9	MGA	class I	BLCL HD3
15885	S[+80]	>sp|Q8IWI9|MGAP_HUMAN MAX gene-associated protein OS=Homo sapiens GN=MGA PE=1 SV=3	S.SVSS[+79.966]PVKSK.G	TRUE	9	Q8IWI9	MGA	class I	BLCL HD3
15949	S[+80]	>sp|P16949|STMN1_HUMAN Stathmin OS=Homo sapiens GN=STMN1 PE=1 SV=3	E.KRAS[+79.966]GQAFEL.I	TRUE	10	P16949	STMN1	class I	BLCL HD3
15974	S[+80]	>sp|P23443|KS6B1_HUMAN Ribosomal protein S6 kinase beta-1 OS=Homo sapiens GN=RPS6KB1 PE=1 SV=2	G.SPRTPVS[+79.966]PVKF.S	TRUE	11	P23443	RPS6KB1	class I	BLCL HD3
15975	S[+80]	>sp|P23443|KS6B1_HUMAN Ribosomal protein S6 kinase beta-1 OS=Homo sapiens GN=RPS6KB1 PE=1 SV=2	G.SPRTPVS[+79.966]PVKF.S	TRUE	11	P23443	RPS6KB1	class I	BLCL HD3
15976	S[+80]	>sp|P23443|KS6B1_HUMAN Ribosomal protein S6 kinase beta-1 OS=Homo sapiens GN=RPS6KB1 PE=1 SV=2	G.SPRTPVS[+79.966]PVKF.S	TRUE	11	P23443	RPS6KB1	class I	BLCL HD3
15977	S[+80]	>sp|P23443|KS6B1_HUMAN Ribosomal protein S6 kinase beta-1 OS=Homo sapiens GN=RPS6KB1 PE=1 SV=2	G.SPRTPVS[+79.966]PVKF.S	TRUE	11	P23443	RPS6KB1	class I	BLCL HD3
15978	S[+80], T[+80]	>sp|P23443|KS6B1_HUMAN Ribosomal protein S6 kinase beta-1 OS=Homo sapiens GN=RPS6KB1 PE=1 SV=2	G.SPRT[+79.966]PVS[+79.966]PVKF.S	TRUE	11	P23443	RPS6KB1	class I	BLCL HD3
15979	S[+80], T[+80]	>sp|P23443|KS6B1_HUMAN Ribosomal protein S6 kinase beta-1 OS=Homo sapiens GN=RPS6KB1 PE=1 SV=2	G.SPRT[+79.966]PVS[+79.966]PVKF.S	TRUE	11	P23443	RPS6KB1	class I	BLCL HD3
16091	S[+80]	>sp|Q6JBY9|CPZIP_HUMAN CapZ-interacting protein OS=Homo sapiens GN=RCSD1 PE=1 SV=1	A.SPKS[+79.966]PGLKA.M	TRUE	9	Q6JBY9	RCSD1	class I	BLCL HD3
16092	S[+80]	>sp|Q6JBY9|CPZIP_HUMAN CapZ-interacting protein OS=Homo sapiens GN=RCSD1 PE=1 SV=1	A.SPKS[+79.966]PGLKA.M	TRUE	9	Q6JBY9	RCSD1	class I	BLCL HD3
16193	S[+80]	>tr|M0R088|M0R088_HUMAN Serine/arginine repetitive matrix protein 1 (Fragment) OS=Homo sapiens GN=SRRM1 PE=1 SV=1	S.RSPS[+79.966]PAPEK.K	TRUE	9	M0R088	SRRM1	class I	BLCL HD3
16194	S[+80]	>tr|M0R088|M0R088_HUMAN Serine/arginine repetitive matrix protein 1 (Fragment) OS=Homo sapiens GN=SRRM1 PE=1 SV=1	S.RSPS[+79.966]PAPEK.K	TRUE	9	M0R088	SRRM1	class I	BLCL HD3
16195	S[+80]	>tr|M0R088|M0R088_HUMAN Serine/arginine repetitive matrix protein 1 (Fragment) OS=Homo sapiens GN=SRRM1 PE=1 SV=1	S.RSPS[+79.966]PAPEK.K	TRUE	9	M0R088	SRRM1	class I	BLCL HD3
16196	S[+80]	>tr|M0R088|M0R088_HUMAN Serine/arginine repetitive matrix protein 1 (Fragment) OS=Homo sapiens GN=SRRM1 PE=1 SV=1	S.RSPS[+79.966]PAPEK.K	TRUE	9	M0R088	SRRM1	class I	BLCL HD3
16197	S[+80]	>tr|M0R088|M0R088_HUMAN Serine/arginine repetitive matrix protein 1 (Fragment) OS=Homo sapiens GN=SRRM1 PE=1 SV=1	R.RTAS[+79.966]PPPPPK.R	TRUE	10	M0R088	SRRM1	class I	BLCL HD3
16198	S[+80]	>tr|M0R088|M0R088_HUMAN Serine/arginine repetitive matrix protein 1 (Fragment) OS=Homo sapiens GN=SRRM1 PE=1 SV=1	R.RTAS[+79.966]PPPPPK.R	TRUE	10	M0R088	SRRM1	class I	BLCL HD3
16199	S[+80]	>tr|M0R088|M0R088_HUMAN Serine/arginine repetitive matrix protein 1 (Fragment) OS=Homo sapiens GN=SRRM1 PE=1 SV=1	R.RTAS[+79.966]PPPPPK.R	TRUE	10	M0R088	SRRM1	class I	BLCL HD3
16371	S[+80]	>sp|O14974|MYPT1_HUMAN Protein phosphatase 1 regulatory subunit 12A OS=Homo sapiens GN=PPP1R12A PE=1 SV=1	Q.ATPTS[+79.966]PIKK.F	TRUE	9	O14974	PPP1R12A	class I	BLCL HD3
16572	S[+80]	>sp|Q9H2X6|HIPK2_HUMAN Homeodomain-interacting protein kinase 2 OS=Homo sapiens GN=HIPK2 PE=1 SV=2	Q.AISS[+79.966]PQRSK.R	TRUE	9	Q9H2X6	HIPK2	class I	BLCL HD3
16573	S[+80]	>sp|Q9H2X6|HIPK2_HUMAN Homeodomain-interacting protein kinase 2 OS=Homo sapiens GN=HIPK2 PE=1 SV=2	Q.AISS[+79.966]PQRSK.R	TRUE	9	Q9H2X6	HIPK2	class I	BLCL HD3
16574	S[+80]	>sp|Q9H2X6|HIPK2_HUMAN Homeodomain-interacting protein kinase 2 OS=Homo sapiens GN=HIPK2 PE=1 SV=2	Q.AISS[+79.966]PQRSK.R	TRUE	9	Q9H2X6	HIPK2	class I	BLCL HD3
16575	S[+80]	>sp|Q9H2X6|HIPK2_HUMAN Homeodomain-interacting protein kinase 2 OS=Homo sapiens GN=HIPK2 PE=1 SV=2	Q.AISS[+79.966]PQRSK.R	TRUE	9	Q9H2X6	HIPK2	class I	BLCL HD3
16576	S[+80]	>sp|Q9H2X6|HIPK2_HUMAN Homeodomain-interacting protein kinase 2 OS=Homo sapiens GN=HIPK2 PE=1 SV=2	Q.AISS[+79.966]PQRSK.R	TRUE	9	Q9H2X6	HIPK2	class I	BLCL HD3
16577	S[+80]	>sp|Q8WUA4|TF3C2_HUMAN General transcription factor 3C polypeptide 2 OS=Homo sapiens GN=GTF3C2 PE=1 SV=2	P.KVSS[+79.966]PTKPK.K	TRUE	9	Q8WUA4	GTF3C2	class I	BLCL HD3
16578	S[+80]	>sp|Q8WUA4|TF3C2_HUMAN General transcription factor 3C polypeptide 2 OS=Homo sapiens GN=GTF3C2 PE=1 SV=2	P.KVSS[+79.966]PTKPK.K	TRUE	9	Q8WUA4	GTF3C2	class I	BLCL HD3
16579	S[+80]	>sp|Q8WUA4|TF3C2_HUMAN General transcription factor 3C polypeptide 2 OS=Homo sapiens GN=GTF3C2 PE=1 SV=2	P.KVSS[+79.966]PTKPK.K	TRUE	9	Q8WUA4	GTF3C2	class I	BLCL HD3
16580	S[+80]	>sp|Q8WUA4|TF3C2_HUMAN General transcription factor 3C polypeptide 2 OS=Homo sapiens GN=GTF3C2 PE=1 SV=2	P.KVSS[+79.966]PTKPK.K	TRUE	9	Q8WUA4	GTF3C2	class I	BLCL HD3
16581	S[+80]	>sp|Q8WUA4|TF3C2_HUMAN General transcription factor 3C polypeptide 2 OS=Homo sapiens GN=GTF3C2 PE=1 SV=2	P.KVSS[+79.966]PTKPK.K	TRUE	9	Q8WUA4	GTF3C2	class I	BLCL HD3
16582	S[+80]	>sp|Q8WUA4|TF3C2_HUMAN General transcription factor 3C polypeptide 2 OS=Homo sapiens GN=GTF3C2 PE=1 SV=2	P.KVSS[+79.966]PTKPK.K	TRUE	9	Q8WUA4	GTF3C2	class I	BLCL HD3
16583	S[+80]	>sp|Q8WUA4|TF3C2_HUMAN General transcription factor 3C polypeptide 2 OS=Homo sapiens GN=GTF3C2 PE=1 SV=2	P.KVSS[+79.966]PTKPK.K	TRUE	9	Q8WUA4	GTF3C2	class I	BLCL HD3
16584	S[+80]	>sp|Q8WUA4|TF3C2_HUMAN General transcription factor 3C polypeptide 2 OS=Homo sapiens GN=GTF3C2 PE=1 SV=2	P.KVSS[+79.966]PTKPK.K	TRUE	9	Q8WUA4	GTF3C2	class I	BLCL HD3
16585	S[+80]	>sp|Q8WUA4|TF3C2_HUMAN General transcription factor 3C polypeptide 2 OS=Homo sapiens GN=GTF3C2 PE=1 SV=2	P.KVSS[+79.966]PTKPK.K	TRUE	9	Q8WUA4	GTF3C2	class I	BLCL HD3
16586	S[+80]	>sp|Q8WUA4|TF3C2_HUMAN General transcription factor 3C polypeptide 2 OS=Homo sapiens GN=GTF3C2 PE=1 SV=2	P.KVSS[+79.966]PTKPK.K	TRUE	9	Q8WUA4	GTF3C2	class I	BLCL HD3
16587	S[+80]	>sp|Q8WUA4|TF3C2_HUMAN General transcription factor 3C polypeptide 2 OS=Homo sapiens GN=GTF3C2 PE=1 SV=2	P.KVSS[+79.966]PTKPK.K	TRUE	9	Q8WUA4	GTF3C2	class I	BLCL HD3
16588	S[+80]	>sp|Q8WUA4|TF3C2_HUMAN General transcription factor 3C polypeptide 2 OS=Homo sapiens GN=GTF3C2 PE=1 SV=2	P.KVSS[+79.966]PTKPK.K	TRUE	9	Q8WUA4	GTF3C2	class I	BLCL HD3
16589	S[+80]	>sp|Q8WUA4|TF3C2_HUMAN General transcription factor 3C polypeptide 2 OS=Homo sapiens GN=GTF3C2 PE=1 SV=2	P.KVSS[+79.966]PTKPK.K	TRUE	9	Q8WUA4	GTF3C2	class I	BLCL HD3
16764	S[+80]	>sp|P11309|PIM1_HUMAN Serine/threonine-protein kinase pim-1 OS=Homo sapiens GN=PIM1 PE=1 SV=3	L.HSLS[+79.966]PGPSK.-	TRUE	9	P11309	PIM1	class I	BLCL HD3
16955	S[+80]	>sp|Q99683|M3K5_HUMAN Mitogen-activated protein kinase kinase kinase 5 OS=Homo sapiens GN=MAP3K5 PE=1 SV=1	V.SHDS[+79.966]QSAHRSL.N	TRUE	11	Q99683	MAP3K5	class I	BLCL HD3
16956	S[+80]	>sp|Q99683|M3K5_HUMAN Mitogen-activated protein kinase kinase kinase 5 OS=Homo sapiens GN=MAP3K5 PE=1 SV=1	V.SHDS[+79.966]QSAHRSL.N	TRUE	11	Q99683	MAP3K5	class I	BLCL HD3
17452	S[+80]	>sp|Q04637|IF4G1_HUMAN Eukaryotic translation initiation factor 4 gamma 1 OS=Homo sapiens GN=EIF4G1 PE=1 SV=4	A.LPPVS[+79.966]PLKAA.L	TRUE	10	Q04637	EIF4G1	class I	BLCL HD3
17453	S[+80]	>sp|Q04637|IF4G1_HUMAN Eukaryotic translation initiation factor 4 gamma 1 OS=Homo sapiens GN=EIF4G1 PE=1 SV=4	A.LPPVS[+79.966]PLKAA.L	TRUE	10	Q04637	EIF4G1	class I	BLCL HD3
17454	S[+80]	>sp|Q04637|IF4G1_HUMAN Eukaryotic translation initiation factor 4 gamma 1 OS=Homo sapiens GN=EIF4G1 PE=1 SV=4	A.LPPVS[+79.966]PLKAA.L	TRUE	10	Q04637	EIF4G1	class I	BLCL HD3
17455	S[+80]	>sp|Q04637|IF4G1_HUMAN Eukaryotic translation initiation factor 4 gamma 1 OS=Homo sapiens GN=EIF4G1 PE=1 SV=4	A.LPPVS[+79.966]PLKAA.L	TRUE	10	Q04637	EIF4G1	class I	BLCL HD3
17498	S[+80]	>sp|Q9BQG0|MBB1A_HUMAN Myb-binding protein 1A OS=Homo sapiens GN=MYBBP1A PE=1 SV=2	S.ATQS[+79.966]PISKK.R	TRUE	9	Q9BQG0	MYBBP1A	class I	BLCL HD3
17499	S[+80]	>sp|Q9BQG0|MBB1A_HUMAN Myb-binding protein 1A OS=Homo sapiens GN=MYBBP1A PE=1 SV=2	S.ATQS[+79.966]PISKK.R	TRUE	9	Q9BQG0	MYBBP1A	class I	BLCL HD3
17500	S[+80]	>sp|Q9BQG0|MBB1A_HUMAN Myb-binding protein 1A OS=Homo sapiens GN=MYBBP1A PE=1 SV=2	S.ATQS[+79.966]PISKKR.K	TRUE	10	Q9BQG0	MYBBP1A	class I	BLCL HD3
17501	S[+80]	>sp|Q9BQG0|MBB1A_HUMAN Myb-binding protein 1A OS=Homo sapiens GN=MYBBP1A PE=1 SV=2	S.ATQS[+79.966]PISKKR.K	TRUE	10	Q9BQG0	MYBBP1A	class I	BLCL HD3
17700	S[+80]	>sp|Q9UKB1|FBW1B_HUMAN F-box/WD repeat-containing protein 11 OS=Homo sapiens GN=FBXW11 PE=1 SV=1	N.ETRS[+79.966]PSRTY.T	TRUE	9	Q9UKB1	FBXW11	class I	BLCL HD3
17765	S[+80]	>sp|Q5BJF6|ODFP2_HUMAN Outer dense fiber protein 2 OS=Homo sapiens GN=ODF2 PE=1 SV=1	S.SPIRSRS[+79.966]PPA.-	TRUE	10	Q5BJF6	ODF2	class I	BLCL HD3
17850	T[+80]	>sp|Q12789|TF3C1_HUMAN General transcription factor 3C polypeptide 1 OS=Homo sapiens GN=GTF3C1 PE=1 SV=4	P.HHST[+79.966]PTKGGW.K	TRUE	10	Q12789	GTF3C1	class I	BLCL HD3
17851	T[+80]	>sp|Q12789|TF3C1_HUMAN General transcription factor 3C polypeptide 1 OS=Homo sapiens GN=GTF3C1 PE=1 SV=4	P.HHST[+79.966]PTKGGW.K	TRUE	10	Q12789	GTF3C1	class I	BLCL HD3
17852	T[+80]	>sp|Q12789|TF3C1_HUMAN General transcription factor 3C polypeptide 1 OS=Homo sapiens GN=GTF3C1 PE=1 SV=4	P.HHST[+79.966]PTKGGW.K	TRUE	10	Q12789	GTF3C1	class I	BLCL HD3
17885	T[+80]	>sp|Q8IWC1|MA7D3_HUMAN MAP7 domain-containing protein 3 OS=Homo sapiens GN=MAP7D3 PE=1 SV=2	Q.SASST[+79.966]VKKK.K	TRUE	9	Q8IWC1	MAP7D3	class I	BLCL HD3
17886	T[+80]	>sp|Q8IWC1|MA7D3_HUMAN MAP7 domain-containing protein 3 OS=Homo sapiens GN=MAP7D3 PE=1 SV=2	Q.SASST[+79.966]VKKK.K	TRUE	9	Q8IWC1	MAP7D3	class I	BLCL HD3
18147	S[+80]	>sp|Q16666|IF16_HUMAN Gamma-interferon-inducible protein 16 OS=Homo sapiens GN=IFI16 PE=1 SV=3	G.RSPS[+79.966]PKTSL.S	TRUE	9	Q16666	IFI16	class I	BLCL HD3
18199	M[+16], S[+80]	>sp|Q6W2J9|BCOR_HUMAN BCL-6 corepressor OS=Homo sapiens GN=BCOR PE=1 SV=1	D.M[+15.995]PHS[+79.966]PTLRV.D	TRUE	9	Q6W2J9	BCOR	class I	BLCL HD3
18394	S[+80]	>sp|Q13029|PRDM2_HUMAN PR domain zinc finger protein 2 OS=Homo sapiens GN=PRDM2 PE=1 SV=3	R.RTAS[+79.966]PPALPK.I	TRUE	10	Q13029	PRDM2	class I	BLCL HD3
18395	S[+80]	>sp|Q13029|PRDM2_HUMAN PR domain zinc finger protein 2 OS=Homo sapiens GN=PRDM2 PE=1 SV=3	R.RTAS[+79.966]PPALPK.I	TRUE	10	Q13029	PRDM2	class I	BLCL HD3
18426	S[+80]	>sp|Q13243|SRSF5_HUMAN Serine/arginine-rich splicing factor 5 OS=Homo sapiens GN=SRSF5 PE=1 SV=1	R.SVSRS[+79.966]PVPEK.S	TRUE	10	Q13243	SRSF5	class I	BLCL HD3
18529	S[+80]	>sp|Q9Y4E1|FA21C_HUMAN WASH complex subunit FAM21C OS=Homo sapiens GN=FAM21C PE=1 SV=3	S.RPTS[+79.966]FADEL.A	TRUE	9	Q9Y4E1	FAM21C	class I	BLCL HD3
18530	S[+80]	>sp|Q9Y4E1|FA21C_HUMAN WASH complex subunit FAM21C OS=Homo sapiens GN=FAM21C PE=1 SV=3	S.RPTS[+79.966]FADEL.A	TRUE	9	Q9Y4E1	FAM21C	class I	BLCL HD3
18602	T[+80]	>sp|A0AV96|RBM47_HUMAN RNA-binding protein 47 OS=Homo sapiens GN=RBM47 PE=1 SV=2	G.RPIT[+79.966]PVYTV.A	TRUE	9	A0AV96	RBM47	class I	BLCL HD3
18603	T[+80]	>sp|A0AV96|RBM47_HUMAN RNA-binding protein 47 OS=Homo sapiens GN=RBM47 PE=1 SV=2	G.RPIT[+79.966]PVYTV.A	TRUE	9	A0AV96	RBM47	class I	BLCL HD3
18662	S[+80]	>sp|Q86VM9|ZCH18_HUMAN Zinc finger CCCH domain-containing protein 18 OS=Homo sapiens GN=ZC3H18 PE=1 SV=2	P.KPRS[+79.966]PQPPS.R	TRUE	9	Q86VM9	ZC3H18	class I	BLCL HD3
18766	S[+80]	>sp|O75362|ZN217_HUMAN Zinc finger protein 217 OS=Homo sapiens GN=ZNF217 PE=1 SV=1	K.TSVS[+79.966]PAPDK.T	TRUE	9	O75362	ZNF217	class I	BLCL HD3
18767	S[+80]	>sp|O75362|ZN217_HUMAN Zinc finger protein 217 OS=Homo sapiens GN=ZNF217 PE=1 SV=1	K.TSVS[+79.966]PAPDK.T	TRUE	9	O75362	ZNF217	class I	BLCL HD3
19019	S[+80]	>sp|Q12830|BPTF_HUMAN Nucleosome-remodeling factor subunit BPTF OS=Homo sapiens GN=BPTF PE=1 SV=3	V.RVQS[+79.966]PSQTR.I	TRUE	9	Q12830	BPTF	class I	BLCL HD3
19163	S[+80]	>sp|Q92793|CBP_HUMAN CREB-binding protein OS=Homo sapiens GN=CREBBP PE=1 SV=3	Q.STSPS[+79.966]QPRK.K	TRUE	9	Q92793	CREBBP	class I	BLCL HD3
19383	S[+80]	>sp|P12755|SKI_HUMAN Ski oncogene OS=Homo sapiens GN=SKI PE=1 SV=1	F.RPWS[+79.966]PAVSA.S	TRUE	9	P12755	SKI	class I	BLCL HD3
19384	S[+80]	>sp|P12755|SKI_HUMAN Ski oncogene OS=Homo sapiens GN=SKI PE=1 SV=1	F.RPWS[+79.966]PAVSA.S	TRUE	9	P12755	SKI	class I	BLCL HD3
19458	S[+80]	>sp|Q9NYF8|BCLF1_HUMAN Bcl-2-associated transcription factor 1 OS=Homo sapiens GN=BCLAF1 PE=1 SV=2	T.RQKS[+79.966]PEIHR.R	TRUE	9	Q9NYF8	BCLAF1	class I	BLCL HD3
19511	S[+80]	>sp|Q68EM7|RHG17_HUMAN Rho GTPase-activating protein 17 OS=Homo sapiens GN=ARHGAP17 PE=1 SV=1	L.SPKPPTRS[+79.966]P.S	TRUE	9	Q68EM7	ARHGAP17	class I	BLCL HD3
19512	S[+80]	>sp|Q68EM7|RHG17_HUMAN Rho GTPase-activating protein 17 OS=Homo sapiens GN=ARHGAP17 PE=1 SV=1	L.SPKPPTRS[+79.966]P.S	TRUE	9	Q68EM7	ARHGAP17	class I	BLCL HD3
19513	S[+80]	>sp|Q68EM7|RHG17_HUMAN Rho GTPase-activating protein 17 OS=Homo sapiens GN=ARHGAP17 PE=1 SV=1	L.SPKPPTRS[+79.966]P.S	TRUE	9	Q68EM7	ARHGAP17	class I	BLCL HD3
19514	S[+80]	>sp|Q68EM7|RHG17_HUMAN Rho GTPase-activating protein 17 OS=Homo sapiens GN=ARHGAP17 PE=1 SV=1	L.SPKPPTRS[+79.966]P.S	TRUE	9	Q68EM7	ARHGAP17	class I	BLCL HD3
19717	S[+80]	>sp|Q13129|RLF_HUMAN Zinc finger protein Rlf OS=Homo sapiens GN=RLF PE=1 SV=2	H.RPVS[+79.966]PAPGA.S	TRUE	9	Q13129	RLF	class I	BLCL HD3
19718	S[+80]	>sp|Q13129|RLF_HUMAN Zinc finger protein Rlf OS=Homo sapiens GN=RLF PE=1 SV=2	H.RPVS[+79.966]PAPGA.S	TRUE	9	Q13129	RLF	class I	BLCL HD3
19952	S[+80]	>sp|Q9HCM1|K1551_HUMAN Uncharacterized protein KIAA1551 OS=Homo sapiens GN=KIAA1551 PE=1 SV=3	L.YRYS[+79.966]PQSFL.P	TRUE	9	Q9HCM1	KIAA1551	class I	BLCL HD3
20385	T[+80]	>sp|Q8WZ42|TITIN_HUMAN Titin OS=Homo sapiens GN=TTN PE=1 SV=4	E.NIT[+79.966]IENTEH.Y	TRUE	9	Q8WZ42	TTN	class I	BLCL HD3
20604	S[+80]	>sp|Q9UBS0|KS6B2_HUMAN Ribosomal protein S6 kinase beta-2 OS=Homo sapiens GN=RPS6KB2 PE=1 SV=2	S.SPRAPVS[+79.966]PLKF.S	TRUE	11	Q9UBS0	RPS6KB2	class I	BLCL HD3
20605	S[+80]	>sp|Q9UBS0|KS6B2_HUMAN Ribosomal protein S6 kinase beta-2 OS=Homo sapiens GN=RPS6KB2 PE=1 SV=2	S.SPRAPVS[+79.966]PLKF.S	TRUE	11	Q9UBS0	RPS6KB2	class I	BLCL HD3
20919	T[+80]	>sp|Q8N960|CE120_HUMAN Centrosomal protein of 120 kDa OS=Homo sapiens GN=CEP120 PE=1 SV=2	K.KVLT[+79.966]PIKEK.T	TRUE	9	Q8N960	CEP120	class I	BLCL HD3
20920	T[+80]	>sp|Q8N960|CE120_HUMAN Centrosomal protein of 120 kDa OS=Homo sapiens GN=CEP120 PE=1 SV=2	K.KVLT[+79.966]PIKEK.T	TRUE	9	Q8N960	CEP120	class I	BLCL HD3
20921	T[+80]	>sp|Q8N960|CE120_HUMAN Centrosomal protein of 120 kDa OS=Homo sapiens GN=CEP120 PE=1 SV=2	K.KVLT[+79.966]PIKEK.T	TRUE	9	Q8N960	CEP120	class I	BLCL HD3
21050	S[+80]	>sp|Q5JXC2|MIIP_HUMAN Migration and invasion-inhibitory protein OS=Homo sapiens GN=MIIP PE=1 SV=3	H.RRKS[+79.966]FDASDTL.A	TRUE	11	Q5JXC2	MIIP	class I	BLCL HD3
21389	T[+80]	>sp|P62136|PP1A_HUMAN Serine/threonine-protein phosphatase PP1-alpha catalytic subunit OS=Homo sapiens GN=PPP1CA PE=1 SV=1	G.RPIT[+79.966]PPRNSA.K	TRUE	10	P62136	PPP1CA	class I	BLCL HD3
21390	T[+80]	>sp|P62136|PP1A_HUMAN Serine/threonine-protein phosphatase PP1-alpha catalytic subunit OS=Homo sapiens GN=PPP1CA PE=1 SV=1	G.RPIT[+79.966]PPRNSA.K	TRUE	10	P62136	PPP1CA	class I	BLCL HD3
21391	T[+80]	>sp|P62136|PP1A_HUMAN Serine/threonine-protein phosphatase PP1-alpha catalytic subunit OS=Homo sapiens GN=PPP1CA PE=1 SV=1	G.RPIT[+79.966]PPRNSA.K	TRUE	10	P62136	PPP1CA	class I	BLCL HD3
21392	T[+80]	>sp|P62136|PP1A_HUMAN Serine/threonine-protein phosphatase PP1-alpha catalytic subunit OS=Homo sapiens GN=PPP1CA PE=1 SV=1	G.RPIT[+79.966]PPRNSA.K	TRUE	10	P62136	PPP1CA	class I	BLCL HD3
21406	S[+80]	>sp|Q15366|PCBP2_HUMAN Poly(rC)-binding protein 2 OS=Homo sapiens GN=PCBP2 PE=1 SV=1	Y.RPKPSSS[+79.966]PVIF.A	TRUE	11	Q15366	PCBP2	class I	BLCL HD3
21445	T[+80]	>sp|P62140|PP1B_HUMAN Serine/threonine-protein phosphatase PP1-beta catalytic subunit OS=Homo sapiens GN=PPP1CB PE=1 SV=3	G.RPVT[+79.966]PPRTA.N	TRUE	9	P62140	PPP1CB	class I	BLCL HD3
21446	T[+80]	>sp|P62140|PP1B_HUMAN Serine/threonine-protein phosphatase PP1-beta catalytic subunit OS=Homo sapiens GN=PPP1CB PE=1 SV=3	G.RPVT[+79.966]PPRTA.N	TRUE	9	P62140	PPP1CB	class I	BLCL HD3
21482	S[+80]	>sp|Q9ULU4|PKCB1_HUMAN Protein kinase C-binding protein 1 OS=Homo sapiens GN=ZMYND8 PE=1 SV=2	D.TSTS[+79.966]PIKKK.K	TRUE	9	Q9ULU4	ZMYND8	class I	BLCL HD3
21483	S[+80]	>sp|Q9ULU4|PKCB1_HUMAN Protein kinase C-binding protein 1 OS=Homo sapiens GN=ZMYND8 PE=1 SV=2	D.TSTS[+79.966]PIKKK.K	TRUE	9	Q9ULU4	ZMYND8	class I	BLCL HD3
21728	S[+80]	>sp|Q63HK3|ZKSC2_HUMAN Zinc finger protein with KRAB and SCAN domains 2 OS=Homo sapiens GN=ZKSCAN2 PE=1 SV=2	Q.QVSS[+79.966]PVHREK.H	TRUE	10	Q63HK3	ZKSCAN2	class I	BLCL HD3
21741	S[+80]	>sp|Q9UGP5|DPOLL_HUMAN DNA polymerase lambda OS=Homo sapiens GN=POLL PE=1 SV=1	T.RPVS[+79.966]PPQKA.K	TRUE	9	Q9UGP5	POLL	class I	BLCL HD3
21742	S[+80]	>sp|Q9UGP5|DPOLL_HUMAN DNA polymerase lambda OS=Homo sapiens GN=POLL PE=1 SV=1	T.RPVS[+79.966]PPQKA.K	TRUE	9	Q9UGP5	POLL	class I	BLCL HD3
21743	S[+80]	>sp|Q9UGP5|DPOLL_HUMAN DNA polymerase lambda OS=Homo sapiens GN=POLL PE=1 SV=1	T.RPVS[+79.966]PPQKA.K	TRUE	9	Q9UGP5	POLL	class I	BLCL HD3
21744	S[+80]	>sp|Q9UGP5|DPOLL_HUMAN DNA polymerase lambda OS=Homo sapiens GN=POLL PE=1 SV=1	T.RPVS[+79.966]PPQKA.K	TRUE	9	Q9UGP5	POLL	class I	BLCL HD3
21745	S[+80]	>sp|Q9UGP5|DPOLL_HUMAN DNA polymerase lambda OS=Homo sapiens GN=POLL PE=1 SV=1	T.RPVS[+79.966]PPQKA.K	TRUE	9	Q9UGP5	POLL	class I	BLCL HD3
21782	T[+80]	>sp|P62995|TRA2B_HUMAN Transformer-2 protein homolog beta OS=Homo sapiens GN=TRA2B PE=1 SV=1	K.RPHT[+79.966]PTPGI.Y	TRUE	9	P62995	TRA2B	class I	BLCL HD3
21944	S[+80]	>sp|P31629|ZEP2_HUMAN Transcription factor HIVEP2 OS=Homo sapiens GN=HIVEP2 PE=1 SV=2	R.RPVS[+79.966]PGKDITA.R	TRUE	11	P31629	HIVEP2	class I	BLCL HD3
22011	S[+80]	>sp|Q9NTI5|PDS5B_HUMAN Sister chromatid cohesion protein PDS5 homolog B OS=Homo sapiens GN=PDS5B PE=1 SV=1	S.KTPS[+79.966]PSQPK.K	TRUE	9	Q9NTI5	PDS5B	class I	BLCL HD3
22012	S[+80]	>sp|Q9Y2D5|AKAP2_HUMAN A-kinase anchor protein 2 OS=Homo sapiens GN=AKAP2 PE=1 SV=3	P.QVSS[+79.966]PVQEK.R	TRUE	9	Q9Y2D5	AKAP2	class I	BLCL HD3
22151	S[+80]	>sp|Q9UKJ3|GPTC8_HUMAN G patch domain-containing protein 8 OS=Homo sapiens GN=GPATCH8 PE=1 SV=2	P.GSGS[+79.966]PAPPR.R	TRUE	9	Q9UKJ3	GPATCH8	class I	BLCL HD3
22152	S[+80]	>sp|Q9UKJ3|GPTC8_HUMAN G patch domain-containing protein 8 OS=Homo sapiens GN=GPATCH8 PE=1 SV=2	P.GSGS[+79.966]PAPPR.R	TRUE	9	Q9UKJ3	GPATCH8	class I	BLCL HD3
22235	S[+80]	>sp|P48436|SOX9_HUMAN Transcription factor SOX-9 OS=Homo sapiens GN=SOX9 PE=1 SV=1	Q.THIS[+79.966]PNAIF.K	TRUE	9	P48436	SOX9	class I	BLCL HD3
22282	T[+80]	>tr|J3KNZ9|J3KNZ9_HUMAN Probable fibrosin-1 OS=Homo sapiens GN=FBRS PE=1 SV=1	V.SPAT[+79.966]PKARA.G	TRUE	9	J3KNZ9	FBRS	class I	BLCL HD3
22366	S[+80]	>sp|Q9NYV4|CDK12_HUMAN Cyclin-dependent kinase 12 OS=Homo sapiens GN=CDK12 PE=1 SV=2	R.RSSS[+79.966]PFLSK.R	TRUE	9	Q9NYV4	CDK12	class I	BLCL HD3
22539	S[+80]	>sp|Q5T200|ZC3HD_HUMAN Zinc finger CCCH domain-containing protein 13 OS=Homo sapiens GN=ZC3H13 PE=1 SV=1	G.QVFS[+79.966]PKKGQKK.K	TRUE	11	Q5T200	ZC3H13	class I	BLCL HD3
22777	S[+80]	>sp|Q6ZN28|MACC1_HUMAN Metastasis-associated in colon cancer protein 1 OS=Homo sapiens GN=MACC1 PE=1 SV=2	S.IHNS[+79.966]DQILL.H	TRUE	9	Q6ZN28	MACC1	class I	BLCL HD3
22804	T[+80]	>sp|Q53GL0|PKHO1_HUMAN Pleckstrin homology domain-containing family O member 1 OS=Homo sapiens GN=PLEKHO1 PE=1 SV=2	G.ATYT[+79.966]PQAPK.K	TRUE	9	Q53GL0	PLEKHO1	class I	BLCL HD3
22820	T[+80]	>sp|Q659C4|LAR1B_HUMAN La-related protein 1B OS=Homo sapiens GN=LARP1B PE=1 SV=2	I.VTQT[+79.966]PPYVKK.H	TRUE	10	Q659C4	LARP1B	class I	BLCL HD3
22821	T[+80]	>sp|Q659C4|LAR1B_HUMAN La-related protein 1B OS=Homo sapiens GN=LARP1B PE=1 SV=2	I.VTQT[+79.966]PPYVKK.H	TRUE	10	Q659C4	LARP1B	class I	BLCL HD3
23085	S[+80]	>sp|Q76L83|ASXL2_HUMAN Putative Polycomb group protein ASXL2 OS=Homo sapiens GN=ASXL2 PE=1 SV=1	G.KVIS[+79.966]PSQKHSK.K	TRUE	11	Q76L83	ASXL2	class I	BLCL HD3
23109	S[+80]	>sp|Q8WXX7|AUTS2_HUMAN Autism susceptibility gene 2 protein OS=Homo sapiens GN=AUTS2 PE=1 SV=1	G.RPVS[+79.966]PRRTTP.L	TRUE	10	Q8WXX7	AUTS2	class I	BLCL HD3
23467	S[+80]	>sp|Q86U90|YRDC_HUMAN YrdC domain-containing protein, mitochondrial OS=Homo sapiens GN=YRDC PE=1 SV=1	F.RPPS[+79.966]PAPAA.P	TRUE	9	Q86U90	YRDC	class I	BLCL HD3
23482	S[+80]	>sp|Q9NY27|PP4R2_HUMAN Serine/threonine-protein phosphatase 4 regulatory subunit 2 OS=Homo sapiens GN=PPP4R2 PE=1 SV=3	V.SSVS[+79.966]PLKNK.H	TRUE	9	Q9NY27	PPP4R2	class I	BLCL HD3
23592	S[+80]	>sp|Q96EA4|SPDLY_HUMAN Protein Spindly OS=Homo sapiens GN=SPDL1 PE=1 SV=2	N.TPNS[+79.966]PRLAA.E	TRUE	9	Q96EA4	SPDL1	class I	BLCL HD3
23646	S[+80]	>sp|Q5T1R4|ZEP3_HUMAN Transcription factor HIVEP3 OS=Homo sapiens GN=HIVEP3 PE=2 SV=1	R.RPWSPS[+79.966]KEA.G	TRUE	9	Q5T1R4	HIVEP3	class I	BLCL HD3
24507	S[+80]	>sp|Q8IY57|YAF2_HUMAN YY1-associated factor 2 OS=Homo sapiens GN=YAF2 PE=1 SV=3	R.KPRPVS[+79.966]QLVA.Q	TRUE	10	Q8IY57	YAF2	class I	BLCL HD3
24558	S[+80]	>sp|Q9BXB4|OSB11_HUMAN Oxysterol-binding protein-related protein 11 OS=Homo sapiens GN=OSBPL11 PE=1 SV=2	S.SSNS[+79.966]PISQR.R	TRUE	9	Q9BXB4	OSBPL11	class I	BLCL HD3
26728	.[42], S[+80]	>sp|P22314|UBA1_HUMAN Ubiquitin-like modifier-activating enzyme 1 OS=Homo sapiens GN=UBA1 PE=1 SV=3	M.[+42.011]SSS[+79.966]PLSKKRRVSGP.D	TRUE	14	P22314	UBA1	class II	BLCL HD3
26729	.[42], S[+80]	>sp|P22314|UBA1_HUMAN Ubiquitin-like modifier-activating enzyme 1 OS=Homo sapiens GN=UBA1 PE=1 SV=3	M.[+42.011]SSS[+79.966]PLSKKRRVSGP.D	TRUE	14	P22314	UBA1	class II	BLCL HD3
29278	Y[+80]	>sp|P07737|PROF1_HUMAN Profilin-1 OS=Homo sapiens GN=PFN1 PE=1 SV=2	L.INKKCY[+79.966]EMASHLRRS.Q	TRUE	15	P07737	PFN1	class II	BLCL HD3
29523	S[+80]	>sp|Q13428|TCOF_HUMAN Treacle protein OS=Homo sapiens GN=TCOF1 PE=1 SV=3	N.LLSGKS[+79.966]PRKSAEPSAN.T	TRUE	16	Q13428	TCOF1	class II	BLCL HD3
29533	S[+80]	>sp|Q6JBY9|CPZIP_HUMAN CapZ-interacting protein OS=Homo sapiens GN=RCSD1 PE=1 SV=1	A.SPKS[+79.966]PGLKA.M	TRUE	9	Q6JBY9	RCSD1	class II	BLCL HD3
29821	Y[+80]	>sp|P01834|IGKC_HUMAN Ig kappa chain C region OS=Homo sapiens GN=IGKC PE=1 SV=1	D.Y[+79.966]EKHKVYACEVTHQG.L	TRUE	15	P01834	IGKC	class II	BLCL HD3
30388	S[+80]	>sp|Q99797|MIPEP_HUMAN Mitochondrial intermediate peptidase OS=Homo sapiens GN=MIPEP PE=1 SV=2	Q.LPVVVLMLNLPRS[+79.966].S	TRUE	13	Q99797	MIPEP	class II	BLCL HD3
30468	Y[+80]	>sp|Q14008|CKAP5_HUMAN Cytoskeleton-associated protein 5 OS=Homo sapiens GN=CKAP5 PE=1 SV=3	T.PTDLILCVPHLY[+79.966]SCLE.D	TRUE	16	Q14008	CKAP5	class II	BLCL HD3
30469	Y[+80]	>sp|Q14008|CKAP5_HUMAN Cytoskeleton-associated protein 5 OS=Homo sapiens GN=CKAP5 PE=1 SV=3	T.PTDLILCVPHLY[+79.966]SCLE.D	TRUE	16	Q14008	CKAP5	class II	BLCL HD3
30470	Y[+80]	>sp|Q14008|CKAP5_HUMAN Cytoskeleton-associated protein 5 OS=Homo sapiens GN=CKAP5 PE=1 SV=3	T.PTDLILCVPHLY[+79.966]SCLE.D	TRUE	16	Q14008	CKAP5	class II	BLCL HD3
30471	Y[+80]	>sp|Q14008|CKAP5_HUMAN Cytoskeleton-associated protein 5 OS=Homo sapiens GN=CKAP5 PE=1 SV=3	T.PTDLILCVPHLY[+79.966]SCLE.D	TRUE	16	Q14008	CKAP5	class II	BLCL HD3
30498	S[+80]	>sp|Q9H2X6|HIPK2_HUMAN Homeodomain-interacting protein kinase 2 OS=Homo sapiens GN=HIPK2 PE=1 SV=2	Q.AISS[+79.966]PQRSK.R	TRUE	9	Q9H2X6	HIPK2	class II	BLCL HD3
30499	S[+80]	>sp|Q9H2X6|HIPK2_HUMAN Homeodomain-interacting protein kinase 2 OS=Homo sapiens GN=HIPK2 PE=1 SV=2	Q.AISS[+79.966]PQRSK.R	TRUE	9	Q9H2X6	HIPK2	class II	BLCL HD3
30590	S[+80]	>sp|Q8IWI9|MGAP_HUMAN MAX gene-associated protein OS=Homo sapiens GN=MGA PE=1 SV=3	S.SVSS[+79.966]PVKSK.G	TRUE	9	Q8IWI9	MGA	class II	BLCL HD3
30606	M[+16]*2, T[+80]	>sp|P14921|ETS1_HUMAN Protein C-ets-1 OS=Homo sapiens GN=ETS1 PE=1 SV=1	D.VPLLT[+79.966]PSSKEM[+15.995]M[+15.995].S	TRUE	12	P14921	ETS1	class II	BLCL HD3
30816	S[+80]	>sp|P78314|3BP2_HUMAN SH3 domain-binding protein 2 OS=Homo sapiens GN=SH3BP2 PE=1 SV=2	F.SDMPRAHS[+79.966]F.T	TRUE	9	P78314	SH3BP2	class I	BLCL HD5
30817	M[+16], S[+80]	>sp|P78314|3BP2_HUMAN SH3 domain-binding protein 2 OS=Homo sapiens GN=SH3BP2 PE=1 SV=2	F.SDM[+15.995]PRAHS[+79.966]F.T	TRUE	9	P78314	SH3BP2	class I	BLCL HD5
30821	S[+80]	>sp|P35579|MYH9_HUMAN Myosin-9 OS=Homo sapiens GN=MYH9 PE=1 SV=4	G.S[+79.966]DEEVDGKADGAEAKPAE.-	TRUE	18	P35579	MYH9	class I	BLCL HD5
31024	S[+80]	>sp|P62906|RL10A_HUMAN 60S ribosomal protein L10a OS=Homo sapiens GN=RPL10A PE=1 SV=2	D.KRFS[+79.966]GTVRL.K	TRUE	9	P62906	RPL10A	class I	BLCL HD5
31307	S[+80]	>sp|P33241|LSP1_HUMAN Lymphocyte-specific protein 1 OS=Homo sapiens GN=LSP1 PE=1 SV=1	T.KLIDRTES[+79.966]L.N	TRUE	9	P33241	LSP1	class I	BLCL HD5
31310	S[+80]	>sp|P33241|LSP1_HUMAN Lymphocyte-specific protein 1 OS=Homo sapiens GN=LSP1 PE=1 SV=1	N.RSIEKSNS[+79.966]V.K	TRUE	9	P33241	LSP1	class I	BLCL HD5
31311	M[+16], S[+80]	>sp|P33241|LSP1_HUMAN Lymphocyte-specific protein 1 OS=Homo sapiens GN=LSP1 PE=1 SV=1	A.RQAS[+79.966]IELPSM[+15.995].A	TRUE	10	P33241	LSP1	class I	BLCL HD5
31383	S[+80]	>sp|Q9Y385|UB2J1_HUMAN Ubiquitin-conjugating enzyme E2 J1 OS=Homo sapiens GN=UBE2J1 PE=1 SV=2	A.KELARQIS[+79.966]F.K	TRUE	9	Q9Y385	UBE2J1	class I	BLCL HD5
31578	S[+80]	>sp|Q15398|DLGP5_HUMAN Disks large-associated protein 5 OS=Homo sapiens GN=DLGAP5 PE=1 SV=2	H.QEHARHIS[+79.966]F.G	TRUE	9	Q15398	DLGAP5	class I	BLCL HD5
32013	S[+80]	>sp|Q8NCD3|HJURP_HUMAN Holliday junction recognition protein OS=Homo sapiens GN=HJURP PE=1 SV=2	R.KSVS[+79.966]PSKTL.S	TRUE	9	Q8NCD3	HJURP	class I	BLCL HD5
32076	S[+80]	>sp|P19838|NFKB1_HUMAN Nuclear factor NF-kappa-B p105 subunit OS=Homo sapiens GN=NFKB1 PE=1 SV=2	V.KTTSQAHS[+79.966]L.P	TRUE	9	P19838	NFKB1	class I	BLCL HD5
32196	S[+80]	>sp|P16070|CD44_HUMAN CD44 antigen OS=Homo sapiens GN=CD44 PE=1 SV=3	N.GAVEDRKPS[+79.966]GLN.G	TRUE	12	P16070	CD44	class I	BLCL HD5
33237	S[+80]	>sp|Q02363|ID2_HUMAN DNA-binding protein inhibitor ID-2 OS=Homo sapiens GN=ID2 PE=1 SV=1	M.KAFS[+79.966]PVRSV.R	TRUE	9	Q02363	ID2	class I	BLCL HD5
33298	S[+80]	>sp|Q9H8V3|ECT2_HUMAN Protein ECT2 OS=Homo sapiens GN=ECT2 PE=1 SV=4	R.KRPS[+79.966]AEHSL.S	TRUE	9	Q9H8V3	ECT2	class I	BLCL HD5
33470	S[+80]	>sp|O60934|NBN_HUMAN Nibrin OS=Homo sapiens GN=NBN PE=1 SV=1	N.YQLS[+79.966]PTKLPSIN.K	TRUE	12	O60934	NBN	class I	BLCL HD5
33815	S[+80]	>sp|Q6AHZ1|Z518A_HUMAN Zinc finger protein 518A OS=Homo sapiens GN=ZNF518A PE=1 SV=2	R.RRFS[+79.966]GTAVY.E	TRUE	9	Q6AHZ1	ZNF518A	class I	BLCL HD5
34413	S[+80]	>sp|P84103|SRSF3_HUMAN Serine/arginine-rich splicing factor 3 OS=Homo sapiens GN=SRSF3 PE=1 SV=1	S.RDRRRERS[+79.966]L.S	TRUE	9	P84103	SRSF3	class I	BLCL HD5
34414	S[+80]	>sp|P84103|SRSF3_HUMAN Serine/arginine-rich splicing factor 3 OS=Homo sapiens GN=SRSF3 PE=1 SV=1	S.RDRRRERS[+79.966]L.S	TRUE	9	P84103	SRSF3	class I	BLCL HD5
34415	S[+80]	>sp|P84103|SRSF3_HUMAN Serine/arginine-rich splicing factor 3 OS=Homo sapiens GN=SRSF3 PE=1 SV=1	S.RDRRRERS[+79.966]L.S	TRUE	9	P84103	SRSF3	class I	BLCL HD5
34416	S[+80]	>sp|P84103|SRSF3_HUMAN Serine/arginine-rich splicing factor 3 OS=Homo sapiens GN=SRSF3 PE=1 SV=1	S.RDRRRERS[+79.966]L.S	TRUE	9	P84103	SRSF3	class I	BLCL HD5
34417	S[+80]	>sp|P84103|SRSF3_HUMAN Serine/arginine-rich splicing factor 3 OS=Homo sapiens GN=SRSF3 PE=1 SV=1	S.RDRRRERS[+79.966]L.S	TRUE	9	P84103	SRSF3	class I	BLCL HD5
34418	S[+80]	>sp|P84103|SRSF3_HUMAN Serine/arginine-rich splicing factor 3 OS=Homo sapiens GN=SRSF3 PE=1 SV=1	S.RDRRRERS[+79.966]L.S	TRUE	9	P84103	SRSF3	class I	BLCL HD5
35783	S[+80]	>sp|P61073|CXCR4_HUMAN C-X-C chemokine receptor type 4 OS=Homo sapiens GN=CXCR4 PE=1 SV=1	S.RGSS[+79.966]LKILSKGKRGG.H	TRUE	15	P61073	CXCR4	class II	BLCL HD5
35790	S[+80]	>sp|P61073|CXCR4_HUMAN C-X-C chemokine receptor type 4 OS=Homo sapiens GN=CXCR4 PE=1 SV=1	R.GSS[+79.966]LKILSKGKR.G	TRUE	12	P61073	CXCR4	class II	BLCL HD5
35791	S[+80]	>sp|P61073|CXCR4_HUMAN C-X-C chemokine receptor type 4 OS=Homo sapiens GN=CXCR4 PE=1 SV=1	R.GSS[+79.966]LKILSKGKR.G	TRUE	12	P61073	CXCR4	class II	BLCL HD5
35792	S[+80]	>sp|P61073|CXCR4_HUMAN C-X-C chemokine receptor type 4 OS=Homo sapiens GN=CXCR4 PE=1 SV=1	R.GSS[+79.966]LKILSKGKR.G	TRUE	12	P61073	CXCR4	class II	BLCL HD5
35793	S[+80]	>sp|P61073|CXCR4_HUMAN C-X-C chemokine receptor type 4 OS=Homo sapiens GN=CXCR4 PE=1 SV=1	R.GSS[+79.966]LKILSKGKRG.G	TRUE	13	P61073	CXCR4	class II	BLCL HD5
35795	S[+80]	>sp|P61073|CXCR4_HUMAN C-X-C chemokine receptor type 4 OS=Homo sapiens GN=CXCR4 PE=1 SV=1	R.GSS[+79.966]LKILSKGKRGG.H	TRUE	14	P61073	CXCR4	class II	BLCL HD5
35796	S[+80]	>sp|P61073|CXCR4_HUMAN C-X-C chemokine receptor type 4 OS=Homo sapiens GN=CXCR4 PE=1 SV=1	R.GSS[+79.966]LKILSKGKRGG.H	TRUE	14	P61073	CXCR4	class II	BLCL HD5
35797	S[+80]	>sp|P61073|CXCR4_HUMAN C-X-C chemokine receptor type 4 OS=Homo sapiens GN=CXCR4 PE=1 SV=1	R.GSS[+79.966]LKILSKGKRGGH.S	TRUE	15	P61073	CXCR4	class II	BLCL HD5
35798	S[+80]	>sp|P61073|CXCR4_HUMAN C-X-C chemokine receptor type 4 OS=Homo sapiens GN=CXCR4 PE=1 SV=1	R.GSS[+79.966]LKILSKGKRGGH.S	TRUE	15	P61073	CXCR4	class II	BLCL HD5
35799	S[+80]	>sp|P61073|CXCR4_HUMAN C-X-C chemokine receptor type 4 OS=Homo sapiens GN=CXCR4 PE=1 SV=1	R.GSS[+79.966]LKILSKGKRGGH.S	TRUE	15	P61073	CXCR4	class II	BLCL HD5
35801	S[+80]	>sp|P61073|CXCR4_HUMAN C-X-C chemokine receptor type 4 OS=Homo sapiens GN=CXCR4 PE=1 SV=1	R.GSS[+79.966]LKILSKGKRGGHS.S	TRUE	16	P61073	CXCR4	class II	BLCL HD5
35802	S[+80]	>sp|P61073|CXCR4_HUMAN C-X-C chemokine receptor type 4 OS=Homo sapiens GN=CXCR4 PE=1 SV=1	R.GSS[+79.966]LKILSKGKRGGHS.S	TRUE	16	P61073	CXCR4	class II	BLCL HD5
35803	S[+80]	>sp|P61073|CXCR4_HUMAN C-X-C chemokine receptor type 4 OS=Homo sapiens GN=CXCR4 PE=1 SV=1	R.GSS[+79.966]LKILSKGKRGGHS.S	TRUE	16	P61073	CXCR4	class II	BLCL HD5
35805	S[+80]	>sp|P61073|CXCR4_HUMAN C-X-C chemokine receptor type 4 OS=Homo sapiens GN=CXCR4 PE=1 SV=1	R.GSS[+79.966]LKILSKGKRGGHSS.V	TRUE	17	P61073	CXCR4	class II	BLCL HD5
35806	S[+80]	>sp|P61073|CXCR4_HUMAN C-X-C chemokine receptor type 4 OS=Homo sapiens GN=CXCR4 PE=1 SV=1	R.GSS[+79.966]LKILSKGKRGGHSS.V	TRUE	17	P61073	CXCR4	class II	BLCL HD5
35807	S[+80]	>sp|P61073|CXCR4_HUMAN C-X-C chemokine receptor type 4 OS=Homo sapiens GN=CXCR4 PE=1 SV=1	R.GSS[+79.966]LKILSKGKRGGHSS.V	TRUE	17	P61073	CXCR4	class II	BLCL HD5
35808	S[+80]	>sp|P61073|CXCR4_HUMAN C-X-C chemokine receptor type 4 OS=Homo sapiens GN=CXCR4 PE=1 SV=1	R.GSS[+79.966]LKILSKGKRGGHSS.V	TRUE	17	P61073	CXCR4	class II	BLCL HD5
35809	S[+80]	>sp|P61073|CXCR4_HUMAN C-X-C chemokine receptor type 4 OS=Homo sapiens GN=CXCR4 PE=1 SV=1	R.GSS[+79.966]LKILSKGKRGGHSS.V	TRUE	17	P61073	CXCR4	class II	BLCL HD5
35810	S[+80]	>sp|P61073|CXCR4_HUMAN C-X-C chemokine receptor type 4 OS=Homo sapiens GN=CXCR4 PE=1 SV=1	R.GSS[+79.966]LKILSKGKRGGHSS.V	TRUE	17	P61073	CXCR4	class II	BLCL HD5
35826	S[+80]	>sp|P61073|CXCR4_HUMAN C-X-C chemokine receptor type 4 OS=Homo sapiens GN=CXCR4 PE=1 SV=1	S.S[+79.966]LKILSKGKRGGHSS.V	TRUE	15	P61073	CXCR4	class II	BLCL HD5
36821	S[+80]	>sp|O60499|STX10_HUMAN Syntaxin-10 OS=Homo sapiens GN=STX10 PE=1 SV=1	M.VSGS[+79.966]IQVLKHMSGRVG.E	TRUE	16	O60499	STX10	class II	BLCL HD5
36828	S[+80]	>sp|O60499|STX10_HUMAN Syntaxin-10 OS=Homo sapiens GN=STX10 PE=1 SV=1	M.VSGS[+79.966]IQVLKHMSGRVG.E	TRUE	16	O60499	STX10	class II	BLCL HD5
37093	S[+80]	>sp|P62937|PPIA_HUMAN Peptidyl-prolyl cis-trans isomerase A OS=Homo sapiens GN=PPIA PE=1 SV=2	T.GGKS[+79.966]IYGEKFEDEN.F	TRUE	14	P62937	PPIA	class II	BLCL HD5
37094	S[+80]	>sp|P62937|PPIA_HUMAN Peptidyl-prolyl cis-trans isomerase A OS=Homo sapiens GN=PPIA PE=1 SV=2	T.GGKS[+79.966]IYGEKFEDEN.F	TRUE	14	P62937	PPIA	class II	BLCL HD5
37447	M[+16], T[+80]	>sp|Q9BTU6|P4K2A_HUMAN Phosphatidylinositol 4-kinase type 2-alpha OS=Homo sapiens GN=PI4K2A PE=1 SV=1	Q.M[+15.995]PPVIVET[+79.966]ARSHQRSSS.E	TRUE	17	Q9BTU6	PI4K2A	class II	BLCL HD5
39255	S[+80]	>sp|Q14008|CKAP5_HUMAN Cytoskeleton-associated protein 5 OS=Homo sapiens GN=CKAP5 PE=1 SV=3	F.EPVLIPEPKIRAVS[+79.966]PH.F	TRUE	16	Q14008	CKAP5	class II	BLCL HD5
39945	S[+80]	>sp|O60934|NBN_HUMAN Nibrin OS=Homo sapiens GN=NBN PE=1 SV=1	N.YQLS[+79.966]PTKLPSIN.K	TRUE	12	O60934	NBN	class II	BLCL HD5
40456	S[+80]	>sp|Q9BS91|S35A5_HUMAN Probable UDP-sugar transporter protein SLC35A5 OS=Homo sapiens GN=SLC35A5 PE=1 SV=2	D.GEELERLTKPKSDES[+79.966]D.E	TRUE	16	Q9BS91	SLC35A5	class II	BLCL HD5
40556	S[+80]	>sp|P02808|STAT_HUMAN Statherin OS=Homo sapiens GN=STATH PE=1 SV=2	A.DSS[+79.966]EEKFLR.R	TRUE	9	P02808	STATH	class II	BLCL HD5
42886	M[+16], S[+80]	>sp|Q68CZ2|TENS3_HUMAN Tensin-3 OS=Homo sapiens GN=TNS3 PE=1 SV=2	K.VM[+15.995]IGS[+79.966]PKKV.-	TRUE	9	Q68CZ2	TNS3	class I	OCI-AML2_DCB
42887	M[+16], S[+80]	>sp|Q68CZ2|TENS3_HUMAN Tensin-3 OS=Homo sapiens GN=TNS3 PE=1 SV=2	K.VM[+15.995]IGS[+79.966]PKKV.-	TRUE	9	Q68CZ2	TNS3	class I	OCI-AML2_DCB
42888	M[+16], S[+80]	>sp|Q68CZ2|TENS3_HUMAN Tensin-3 OS=Homo sapiens GN=TNS3 PE=1 SV=2	K.VM[+15.995]IGS[+79.966]PKKV.-	TRUE	9	Q68CZ2	TNS3	class I	OCI-AML2_DCB
42889	M[+16], S[+80]	>sp|Q68CZ2|TENS3_HUMAN Tensin-3 OS=Homo sapiens GN=TNS3 PE=1 SV=2	K.VM[+15.995]IGS[+79.966]PKKV.-	TRUE	9	Q68CZ2	TNS3	class I	OCI-AML2_DCB
43172	T[+80]	>sp|Q8WUB8|PHF10_HUMAN PHD finger protein 10 OS=Homo sapiens GN=PHF10 PE=1 SV=3	Q.RAPPT[+79.966]PRKV.G	TRUE	9	Q8WUB8	PHF10	class I	OCI-AML2_DCB
43173	T[+80]	>sp|Q8WUB8|PHF10_HUMAN PHD finger protein 10 OS=Homo sapiens GN=PHF10 PE=1 SV=3	Q.RAPPT[+79.966]PRKV.G	TRUE	9	Q8WUB8	PHF10	class I	OCI-AML2_DCB
43174	T[+80]	>sp|Q8WUB8|PHF10_HUMAN PHD finger protein 10 OS=Homo sapiens GN=PHF10 PE=1 SV=3	Q.RAPPT[+79.966]PRKV.G	TRUE	9	Q8WUB8	PHF10	class I	OCI-AML2_DCB
43320	T[+80]	>sp|Q9Y2X9|ZN281_HUMAN Zinc finger protein 281 OS=Homo sapiens GN=ZNF281 PE=1 SV=1	T.RVKT[+79.966]PTSQSY.R	TRUE	10	Q9Y2X9	ZNF281	class I	OCI-AML2_DCB
43321	T[+80]	>sp|Q9Y2X9|ZN281_HUMAN Zinc finger protein 281 OS=Homo sapiens GN=ZNF281 PE=1 SV=1	T.RVKT[+79.966]PTSQSY.R	TRUE	10	Q9Y2X9	ZNF281	class I	OCI-AML2_DCB
45601	S[+80]	>sp|Q9Y5R8|TPPC1_HUMAN Trafficking protein particle complex subunit 1 OS=Homo sapiens GN=TRAPPC1 PE=1 SV=1	S.RLDS[+79.966]YVRSL.P	TRUE	9	Q9Y5R8	TRAPPC1	class I	OCI-AML2_DCB
46277	M[+16], S[+80]	>sp|Q6ZTQ3|RASF6_HUMAN Ras association domain-containing protein 6 OS=Homo sapiens (Human) OX=9606 GN=RASSF6 PE=1 SV=1	Y.RTM[+15.995]S[+79.966]EAALVRK.R	TRUE	11	Q6ZTQ3	RASSF6	class I
47331	S[+80]	>sp|Q8IYB3|SRRM1_HUMAN Serine/arginine repetitive matrix protein 1 OS=Homo sapiens (Human) OX=9606 GN=SRRM1 PE=1 SV=2	S.RSPS[+79.966]PAPEK.K	TRUE	9	Q8IYB3	SRRM1	class I
47333	S[+80]	>sp|Q8IYB3|SRRM1_HUMAN Serine/arginine repetitive matrix protein 1 OS=Homo sapiens (Human) OX=9606 GN=SRRM1 PE=1 SV=2	R.RTAS[+79.966]PPPPPK.R	TRUE	10	Q8IYB3	SRRM1	class I
47507	S[+80]	>sp|Q9UQ35|SRRM2_HUMAN Serine/arginine repetitive matrix protein 2 OS=Homo sapiens (Human) OX=9606 GN=SRRM2 PE=1 SV=2	D.ATAS[+79.966]PPRQK.D	TRUE	9	Q9UQ35	SRRM2	class I
47508	S[+80]	>sp|Q9UQ35|SRRM2_HUMAN Serine/arginine repetitive matrix protein 2 OS=Homo sapiens (Human) OX=9606 GN=SRRM2 PE=1 SV=2	D.ATAS[+79.966]PPRQK.D	TRUE	9	Q9UQ35	SRRM2	class I
47746	S[+80]	>sp|Q5VYV7|SLX4I_HUMAN Protein SLX4IP OS=Homo sapiens (Human) OX=9606 GN=SLX4IP PE=1 SV=1	L.STIQNS[+79.966]PTKK.R	TRUE	10	Q5VYV7	SLX4IP	class I
47863	S[+80]	>sp|O75362|ZN217_HUMAN Zinc finger protein 217 OS=Homo sapiens (Human) OX=9606 GN=ZNF217 PE=1 SV=1	K.TSVS[+79.966]PAPDK.T	TRUE	9	O75362	ZNF217	class I
48150	S[+80]	>sp|Q9Y2D5|AKAP2_HUMAN A-kinase anchor protein 2 OS=Homo sapiens (Human) OX=9606 GN=AKAP2 PE=1 SV=3	P.QVSS[+79.966]PVQEK.R	TRUE	9	Q9Y2D5	AKAP2	class I
48168	S[+80]	>sp|Q9BQG0|MBB1A_HUMAN Myb-binding protein 1A OS=Homo sapiens (Human) OX=9606 GN=MYBBP1A PE=1 SV=2	S.ATQS[+79.966]PISKK.R	TRUE	9	Q9BQG0	MYBBP1A	class I
48847	S[+80]	>sp|P21580|TNAP3_HUMAN Tumor necrosis factor alpha-induced protein 3 OS=Homo sapiens (Human) OX=9606 GN=TNFAIP3 PE=1 SV=1	W.NPEESTGGPHS[+79.966]APP.T	TRUE	14	P21580	TNFAIP3	class I
49713	T[+80]	>sp|Q05519|SRS11_HUMAN Serine/arginine-rich splicing factor 11 OS=Homo sapiens (Human) OX=9606 GN=SRSF11 PE=1 SV=1	K.RSKT[+79.966]PPKSY.S	TRUE	9	Q05519	SRSF11	class I
49951	S[+80]	>sp|Q9UKJ3|GPTC8_HUMAN G patch domain-containing protein 8 OS=Homo sapiens (Human) OX=9606 GN=GPATCH8 PE=1 SV=2	P.GSGS[+79.966]PAPPR.R	TRUE	9	Q9UKJ3	GPATCH8	class I
51308	S[+80]	>sp|Q9NYF8|BCLF1_HUMAN Bcl-2-associated transcription factor 1 OS=Homo sapiens GN=BCLAF1 PE=1 SV=2	T.RQKS[+79.966]PEIHR.R	TRUE	9	Q9NYF8	BCLAF1	class I	EBV-LPD1
51411	S[+80]	>sp|Q6ZTQ3|RASF6_HUMAN Ras association domain-containing protein 6 OS=Homo sapiens GN=RASSF6 PE=1 SV=1	Y.RTMS[+79.966]EAALVRK.R	TRUE	11	Q6ZTQ3	RASSF6	class I	EBV-LPD1
51413	M[+16], S[+80]	>sp|Q6ZTQ3|RASF6_HUMAN Ras association domain-containing protein 6 OS=Homo sapiens GN=RASSF6 PE=1 SV=1	Y.RTM[+15.995]S[+79.966]EAALVRK.R	TRUE	11	Q6ZTQ3	RASSF6	class I	EBV-LPD1
51691	S[+80]	>sp|O43491|E41L2_HUMAN Band 4.1-like protein 2 OS=Homo sapiens GN=EPB41L2 PE=1 SV=1	Y.RLVS[+79.966]PEQPPK.A	TRUE	10	O43491	EPB41L2	class I	EBV-LPD1
52364	S[+80]	>sp|Q5T8P6|RBM26_HUMAN RNA-binding protein 26 OS=Homo sapiens GN=RBM26 PE=1 SV=3	N.RTNS[+79.966]PGFQK.K	TRUE	9	Q5T8P6	RBM26	class I	EBV-LPD1
53017	S[+80]	>sp|Q12830|BPTF_HUMAN Nucleosome-remodeling factor subunit BPTF OS=Homo sapiens GN=BPTF PE=1 SV=3	V.RVQS[+79.966]PSQTR.I	TRUE	9	Q12830	BPTF	class I	EBV-LPD1
53067	S[+80]	>sp|Q12802|AKP13_HUMAN A-kinase anchor protein 13 OS=Homo sapiens GN=AKAP13 PE=1 SV=2	R.RTES[+79.966]DSGLKK.G	TRUE	10	Q12802	AKAP13	class I	EBV-LPD1
53068	S[+80]	>sp|Q12802|AKP13_HUMAN A-kinase anchor protein 13 OS=Homo sapiens GN=AKAP13 PE=1 SV=2	R.RTES[+79.966]DSGLKK.G	TRUE	10	Q12802	AKAP13	class I	EBV-LPD1
53351	S[+80]	>sp|O14974|MYPT1_HUMAN Protein phosphatase 1 regulatory subunit 12A OS=Homo sapiens GN=PPP1R12A PE=1 SV=1	Q.ATPTS[+79.966]PIKK.F	TRUE	9	O14974	PPP1R12A	class I	EBV-LPD1
53542	S[+80]	>sp|P15822|ZEP1_HUMAN Zinc finger protein 40 OS=Homo sapiens GN=HIVEP1 PE=1 SV=3	R.KTLS[+79.966]PGKAR.Q	TRUE	9	P15822	HIVEP1	class I	EBV-LPD1
53543	S[+80]	>sp|P15822|ZEP1_HUMAN Zinc finger protein 40 OS=Homo sapiens GN=HIVEP1 PE=1 SV=3	R.KTLS[+79.966]PGKAR.Q	TRUE	9	P15822	HIVEP1	class I	EBV-LPD1
53644	S[+80]	>sp|Q13177|PAK2_HUMAN Serine/threonine-protein kinase PAK 2 OS=Homo sapiens GN=PAK2 PE=1 SV=3	H.KIIS[+79.966]IFSGTEK.G	TRUE	11	Q13177	PAK2	class I	EBV-LPD1
53783	S[+80]	>sp|Q9P2B7|CFA97_HUMAN Cilia- and flagella-associated protein 97 OS=Homo sapiens GN=CFAP97 PE=1 SV=2	G.EESS[+79.966]DDGKKY.H	TRUE	10	Q9P2B7	CFAP97	class I	EBV-LPD1
53784	S[+80]	>sp|Q9P2B7|CFA97_HUMAN Cilia- and flagella-associated protein 97 OS=Homo sapiens GN=CFAP97 PE=1 SV=2	G.EESS[+79.966]DDGKKY.H	TRUE	10	Q9P2B7	CFAP97	class I	EBV-LPD1
53785	S[+80]	>sp|Q9P2B7|CFA97_HUMAN Cilia- and flagella-associated protein 97 OS=Homo sapiens GN=CFAP97 PE=1 SV=2	G.EESS[+79.966]DDGKKY.H	TRUE	10	Q9P2B7	CFAP97	class I	EBV-LPD1
53786	S[+80]	>sp|Q9P2B7|CFA97_HUMAN Cilia- and flagella-associated protein 97 OS=Homo sapiens GN=CFAP97 PE=1 SV=2	G.EESS[+79.966]DDGKKY.H	TRUE	10	Q9P2B7	CFAP97	class I	EBV-LPD1
53835	S[+80]	>sp|Q8IYB3|SRRM1_HUMAN Serine/arginine repetitive matrix protein 1 OS=Homo sapiens GN=SRRM1 PE=1 SV=2	S.RSPS[+79.966]PAPEK.K	TRUE	9	Q8IYB3	SRRM1	class I	EBV-LPD1
53836	S[+80]	>sp|Q8IYB3|SRRM1_HUMAN Serine/arginine repetitive matrix protein 1 OS=Homo sapiens GN=SRRM1 PE=1 SV=2	S.RSPS[+79.966]PAPEK.K	TRUE	9	Q8IYB3	SRRM1	class I	EBV-LPD1
53838	S[+80]	>sp|Q8IYB3|SRRM1_HUMAN Serine/arginine repetitive matrix protein 1 OS=Homo sapiens GN=SRRM1 PE=1 SV=2	R.RTAS[+79.966]PPPPPK.R	TRUE	10	Q8IYB3	SRRM1	class I	EBV-LPD1
53839	S[+80]	>sp|Q8IYB3|SRRM1_HUMAN Serine/arginine repetitive matrix protein 1 OS=Homo sapiens GN=SRRM1 PE=1 SV=2	R.RTAS[+79.966]PPPPPK.R	TRUE	10	Q8IYB3	SRRM1	class I	EBV-LPD1
53940	S[+80]	>sp|Q16665|HIF1A_HUMAN Hypoxia-inducible factor 1-alpha OS=Homo sapiens GN=HIF1A PE=1 SV=1	S.RTAS[+79.966]PNRAGK.G	TRUE	10	Q16665	HIF1A	class I	EBV-LPD1
53941	S[+80]	>sp|Q16665|HIF1A_HUMAN Hypoxia-inducible factor 1-alpha OS=Homo sapiens GN=HIF1A PE=1 SV=1	S.RTAS[+79.966]PNRAGK.G	TRUE	10	Q16665	HIF1A	class I	EBV-LPD1
53942	S[+80]	>sp|Q16665|HIF1A_HUMAN Hypoxia-inducible factor 1-alpha OS=Homo sapiens GN=HIF1A PE=1 SV=1	S.RTAS[+79.966]PNRAGK.G	TRUE	10	Q16665	HIF1A	class I	EBV-LPD1
53994	S[+80]	>sp|Q9Y2W1|TR150_HUMAN Thyroid hormone receptor-associated protein 3 OS=Homo sapiens GN=THRAP3 PE=1 SV=2	S.RSYS[+79.966]PAHNR.E	TRUE	9	Q9Y2W1	THRAP3	class I	EBV-LPD1
53995	S[+80]	>sp|Q9Y2W1|TR150_HUMAN Thyroid hormone receptor-associated protein 3 OS=Homo sapiens GN=THRAP3 PE=1 SV=2	S.RSYS[+79.966]PAHNR.E	TRUE	9	Q9Y2W1	THRAP3	class I	EBV-LPD1
54147	S[+80]	>sp|Q86XP3|DDX42_HUMAN ATP-dependent RNA helicase DDX42 OS=Homo sapiens GN=DDX42 PE=1 SV=1	P.AENS[+79.966]PTRQQF.H	TRUE	10	Q86XP3	DDX42	class I	EBV-LPD1
54361	S[+80]	>sp|Q9BQG0|MBB1A_HUMAN Myb-binding protein 1A OS=Homo sapiens GN=MYBBP1A PE=1 SV=2	S.ATQS[+79.966]PISKK.R	TRUE	9	Q9BQG0	MYBBP1A	class I	EBV-LPD1
54459	S[+80]	>sp|O43683|BUB1_HUMAN Mitotic checkpoint serine/threonine-protein kinase BUB1 OS=Homo sapiens GN=BUB1 PE=1 SV=1	I.QEKS[+79.966]PKQAL.S	TRUE	9	O43683	BUB1	class I	EBV-LPD1
54583	S[+80]	>tr|F8WA11|F8WA11_HUMAN CLIP-associating protein 1 OS=Homo sapiens GN=CLASP1 PE=1 SV=2	S.RETS[+79.966]PNRIGL.D	TRUE	10	F8WA11	CLASP1	class I	EBV-LPD1
54616	S[+80]	>sp|Q9UQ35|SRRM2_HUMAN Serine/arginine repetitive matrix protein 2 OS=Homo sapiens GN=SRRM2 PE=1 SV=2	D.ATAS[+79.966]PPRQK.D	TRUE	9	Q9UQ35	SRRM2	class I	EBV-LPD1
54617	S[+80]	>sp|Q9UQ35|SRRM2_HUMAN Serine/arginine repetitive matrix protein 2 OS=Homo sapiens GN=SRRM2 PE=1 SV=2	D.ATAS[+79.966]PPRQK.D	TRUE	9	Q9UQ35	SRRM2	class I	EBV-LPD1
54839	S[+80]	>sp|Q14241|ELOA1_HUMAN Transcription elongation factor B polypeptide 3 OS=Homo sapiens GN=TCEB3 PE=1 SV=2	S.RSYS[+79.966]PDHRQK.K	TRUE	10	Q14241	TCEB3	class I	EBV-LPD1
54840	S[+80]	>sp|Q14241|ELOA1_HUMAN Transcription elongation factor B polypeptide 3 OS=Homo sapiens GN=TCEB3 PE=1 SV=2	S.RSYS[+79.966]PDHRQK.K	TRUE	10	Q14241	TCEB3	class I	EBV-LPD1
54841	S[+80]	>sp|Q14241|ELOA1_HUMAN Transcription elongation factor B polypeptide 3 OS=Homo sapiens GN=TCEB3 PE=1 SV=2	S.RSYS[+79.966]PDHRQKK.H	TRUE	11	Q14241	TCEB3	class I	EBV-LPD1
54842	S[+80]	>sp|Q14241|ELOA1_HUMAN Transcription elongation factor B polypeptide 3 OS=Homo sapiens GN=TCEB3 PE=1 SV=2	S.RSYS[+79.966]PDHRQKK.H	TRUE	11	Q14241	TCEB3	class I	EBV-LPD1
55016	M[+16], S[+80]	>sp|O60264|SMCA5_HUMAN SWI/SNF-related matrix-associated actin-dependent regulator of chromatin subfamily A member 5 OS=Homo sapiens GN=SMARCA5 PE=1 SV=1	Q.KTPTS[+79.966]PLKM[+15.995]K.P	TRUE	10	O60264	SMARCA5	class I	EBV-LPD1
55067	S[+80]	>sp|Q5W0B1|RN219_HUMAN RING finger protein 219 OS=Homo sapiens GN=RNF219 PE=1 SV=1	K.AEVDNRS[+79.966]PQKF.G	TRUE	11	Q5W0B1	RNF219	class I	EBV-LPD1
55337	S[+80]	>sp|Q9Y2D5|AKAP2_HUMAN A-kinase anchor protein 2 OS=Homo sapiens GN=AKAP2 PE=1 SV=3	P.QVSS[+79.966]PVQEK.R	TRUE	9	Q9Y2D5	AKAP2	class I	EBV-LPD1
55713	S[+80]	>sp|O43166|SI1L1_HUMAN Signal-induced proliferation-associated 1-like protein 1 OS=Homo sapiens GN=SIPA1L1 PE=1 SV=4	A.ATSS[+79.966]PRSGPGK.E	TRUE	11	O43166	SIPA1L1	class I	EBV-LPD1
55918	S[+80]	>sp|O75791|GRAP2_HUMAN GRB2-related adapter protein 2 OS=Homo sapiens GN=GRAP2 PE=1 SV=1	Y.RTNS[+79.966]ISRQK.Q	TRUE	9	O75791	GRAP2	class I	EBV-LPD1
55977	S[+80]	>sp|Q6ZRI6|CO039_HUMAN Uncharacterized protein C15orf39 OS=Homo sapiens GN=C15orf39 PE=1 SV=3	T.AEAS[+79.966]PVKAS.R	TRUE	9	Q6ZRI6	C15orf39	class I	EBV-LPD1
55978	S[+80]	>sp|Q6ZRI6|CO039_HUMAN Uncharacterized protein C15orf39 OS=Homo sapiens GN=C15orf39 PE=1 SV=3	T.AEAS[+79.966]PVKAS.R	TRUE	9	Q6ZRI6	C15orf39	class I	EBV-LPD1
55979	S[+80]	>sp|Q6ZRI6|CO039_HUMAN Uncharacterized protein C15orf39 OS=Homo sapiens GN=C15orf39 PE=1 SV=3	T.AEAS[+79.966]PVKASR.S	TRUE	10	Q6ZRI6	C15orf39	class I	EBV-LPD1
55980	S[+80]	>sp|Q6ZRI6|CO039_HUMAN Uncharacterized protein C15orf39 OS=Homo sapiens GN=C15orf39 PE=1 SV=3	T.AEAS[+79.966]PVKASR.S	TRUE	10	Q6ZRI6	C15orf39	class I	EBV-LPD1
56018	S[+80]	>sp|Q9NTI5|PDS5B_HUMAN Sister chromatid cohesion protein PDS5 homolog B OS=Homo sapiens GN=PDS5B PE=1 SV=1	S.KTPS[+79.966]PSQPK.K	TRUE	9	Q9NTI5	PDS5B	class I	EBV-LPD1
56198	S[+80]	>sp|P55196|AFAD_HUMAN Afadin OS=Homo sapiens GN=MLLT4 PE=1 SV=3	T.RTIS[+79.966]NPEVVMK.R	TRUE	11	P55196	MLLT4	class I	EBV-LPD1
56199	M[+16], S[+80]	>sp|P55196|AFAD_HUMAN Afadin OS=Homo sapiens GN=MLLT4 PE=1 SV=3	T.RTIS[+79.966]NPEVVM[+15.995]K.R	TRUE	11	P55196	MLLT4	class I	EBV-LPD1
56270	T[+80]	>sp|P53396|ACLY_HUMAN ATP-citrate synthase OS=Homo sapiens GN=ACLY PE=1 SV=3	G.STST[+79.966]PAPSR.T	TRUE	9	P53396	ACLY	class I	EBV-LPD1
56299	S[+80]	>sp|Q8WUA4|TF3C2_HUMAN General transcription factor 3C polypeptide 2 OS=Homo sapiens GN=GTF3C2 PE=1 SV=2	P.KVSS[+79.966]PTKPK.K	TRUE	9	Q8WUA4	GTF3C2	class I	EBV-LPD1
56300	S[+80]	>sp|Q8WUA4|TF3C2_HUMAN General transcription factor 3C polypeptide 2 OS=Homo sapiens GN=GTF3C2 PE=1 SV=2	P.KVSS[+79.966]PTKPK.K	TRUE	9	Q8WUA4	GTF3C2	class I	EBV-LPD1
56301	S[+80]	>sp|Q8WUA4|TF3C2_HUMAN General transcription factor 3C polypeptide 2 OS=Homo sapiens GN=GTF3C2 PE=1 SV=2	P.KVSS[+79.966]PTKPK.K	TRUE	9	Q8WUA4	GTF3C2	class I	EBV-LPD1
56429	S[+80]	>sp|Q05655|KPCD_HUMAN Protein kinase C delta type OS=Homo sapiens GN=PRKCD PE=1 SV=2	D.QEFLNEKARLS[+79.966]Y.S	TRUE	12	Q05655	PRKCD	class I	EBV-LPD1
57147	T[+80]	>sp|Q8N960|CE120_HUMAN Centrosomal protein of 120 kDa OS=Homo sapiens GN=CEP120 PE=1 SV=2	K.KVLT[+79.966]PIKEK.T	TRUE	9	Q8N960	CEP120	class I	EBV-LPD1
57148	T[+80]	>sp|Q8N960|CE120_HUMAN Centrosomal protein of 120 kDa OS=Homo sapiens GN=CEP120 PE=1 SV=2	K.KVLT[+79.966]PIKEK.T	TRUE	9	Q8N960	CEP120	class I	EBV-LPD1
57149	T[+80]	>sp|Q8N960|CE120_HUMAN Centrosomal protein of 120 kDa OS=Homo sapiens GN=CEP120 PE=1 SV=2	K.KVLT[+79.966]PIKEK.T	TRUE	9	Q8N960	CEP120	class I	EBV-LPD1
57475	S[+80]	>sp|O75362|ZN217_HUMAN Zinc finger protein 217 OS=Homo sapiens GN=ZNF217 PE=1 SV=1	K.TSVS[+79.966]PAPDK.T	TRUE	9	O75362	ZNF217	class I	EBV-LPD1
57476	S[+80]	>sp|O75362|ZN217_HUMAN Zinc finger protein 217 OS=Homo sapiens GN=ZNF217 PE=1 SV=1	K.TSVS[+79.966]PAPDK.T	TRUE	9	O75362	ZNF217	class I	EBV-LPD1
57987	S[+80]	>sp|Q7Z5K2|WAPL_HUMAN Wings apart-like protein homolog OS=Homo sapiens GN=WAPL PE=1 SV=1	P.SEIS[+79.966]PIKGSVR.T	TRUE	11	Q7Z5K2	WAPL	class I	EBV-LPD1
58465	S[+80]	>sp|Q8NDI1|EHBP1_HUMAN EH domain-binding protein 1 OS=Homo sapiens GN=EHBP1 PE=1 SV=3	R.RTKS[+79.966]DTEPQK.S	TRUE	10	Q8NDI1	EHBP1	class I	EBV-LPD1
58466	S[+80]	>sp|Q8NDI1|EHBP1_HUMAN EH domain-binding protein 1 OS=Homo sapiens GN=EHBP1 PE=1 SV=3	R.RTKS[+79.966]DTEPQK.S	TRUE	10	Q8NDI1	EHBP1	class I	EBV-LPD1
58649	S[+80]	>sp|Q9H2X6|HIPK2_HUMAN Homeodomain-interacting protein kinase 2 OS=Homo sapiens GN=HIPK2 PE=1 SV=2	Q.AISS[+79.966]PQRSK.R	TRUE	9	Q9H2X6	HIPK2	class I	EBV-LPD1
58650	S[+80]	>sp|Q9H2X6|HIPK2_HUMAN Homeodomain-interacting protein kinase 2 OS=Homo sapiens GN=HIPK2 PE=1 SV=2	Q.AISS[+79.966]PQRSK.R	TRUE	9	Q9H2X6	HIPK2	class I	EBV-LPD1
58734	S[+80]	>sp|Q8IWI9|MGAP_HUMAN MAX gene-associated protein OS=Homo sapiens GN=MGA PE=1 SV=3	S.SVSS[+79.966]PVKSK.G	TRUE	9	Q8IWI9	MGA	class I	EBV-LPD1
58735	S[+80]	>sp|Q8IWI9|MGAP_HUMAN MAX gene-associated protein OS=Homo sapiens GN=MGA PE=1 SV=3	S.SVSS[+79.966]PVKSK.G	TRUE	9	Q8IWI9	MGA	class I	EBV-LPD1
58837	S[+80]	>sp|Q92793|CBP_HUMAN CREB-binding protein OS=Homo sapiens GN=CREBBP PE=1 SV=3	Q.STSPS[+79.966]QPRK.K	TRUE	9	Q92793	CREBBP	class I	EBV-LPD1
58888	S[+80]	>tr|A0A0A0MTM7|A0A0A0MTM7_HUMAN Retinoblastoma-like protein 2 OS=Homo sapiens GN=RBL2 PE=1 SV=1	I.QQIS[+79.966]PGGQQQK.Q	TRUE	11	A0A0A0MTM7	RBL2	class I	EBV-LPD1
59252	T[+80]	>sp|Q9BQI3|E2AK1_HUMAN Eukaryotic translation initiation factor 2-alpha kinase 1 OS=Homo sapiens GN=EIF2AK1 PE=1 SV=2	F.AEPT[+79.966]PEKEKRF.G	TRUE	11	Q9BQI3	EIF2AK1	class I	EBV-LPD1
59253	T[+80]	>sp|Q9BQI3|E2AK1_HUMAN Eukaryotic translation initiation factor 2-alpha kinase 1 OS=Homo sapiens GN=EIF2AK1 PE=1 SV=2	F.AEPT[+79.966]PEKEKRF.G	TRUE	11	Q9BQI3	EIF2AK1	class I	EBV-LPD1
59606	S[+80]	>sp|Q5JSH3|WDR44_HUMAN WD repeat-containing protein 44 OS=Homo sapiens GN=WDR44 PE=1 SV=1	Q.ATAS[+79.966]PIVAR.T	TRUE	9	Q5JSH3	WDR44	class I	EBV-LPD1
59965	S[+80]	>sp|Q03989|ARI5A_HUMAN AT-rich interactive domain-containing protein 5A OS=Homo sapiens GN=ARID5A PE=1 SV=2	H.GIMS[+79.966]PLAKK.K	TRUE	9	Q03989	ARID5A	class I	EBV-LPD1
60030	S[+80]	>sp|Q13029|PRDM2_HUMAN PR domain zinc finger protein 2 OS=Homo sapiens GN=PRDM2 PE=1 SV=3	R.RTAS[+79.966]PPALPK.I	TRUE	10	Q13029	PRDM2	class I	EBV-LPD1
60031	S[+80]	>sp|Q13029|PRDM2_HUMAN PR domain zinc finger protein 2 OS=Homo sapiens GN=PRDM2 PE=1 SV=3	R.RTAS[+79.966]PPALPK.I	TRUE	10	Q13029	PRDM2	class I	EBV-LPD1
60032	S[+80]	>sp|Q13029|PRDM2_HUMAN PR domain zinc finger protein 2 OS=Homo sapiens GN=PRDM2 PE=1 SV=3	R.RTAS[+79.966]PPALPK.I	TRUE	10	Q13029	PRDM2	class I	EBV-LPD1
60305	S[+80]	>sp|Q14207|NPAT_HUMAN Protein NPAT OS=Homo sapiens GN=NPAT PE=1 SV=3	A.SLMS[+79.966]PGRRK.S	TRUE	9	Q14207	NPAT	class I	EBV-LPD1
60306	M[+16], S[+80]	>sp|Q14207|NPAT_HUMAN Protein NPAT OS=Homo sapiens GN=NPAT PE=1 SV=3	A.SLM[+15.995]S[+79.966]PGRRK.S	TRUE	9	Q14207	NPAT	class I	EBV-LPD1
60545	S[+80]	>sp|Q9UKJ3|GPTC8_HUMAN G patch domain-containing protein 8 OS=Homo sapiens GN=GPATCH8 PE=1 SV=2	P.GSGS[+79.966]PAPPR.R	TRUE	9	Q9UKJ3	GPATCH8	class I	EBV-LPD1
60546	S[+80]	>sp|Q9UKJ3|GPTC8_HUMAN G patch domain-containing protein 8 OS=Homo sapiens GN=GPATCH8 PE=1 SV=2	P.GSGS[+79.966]PAPPR.R	TRUE	9	Q9UKJ3	GPATCH8	class I	EBV-LPD1
60727	S[+80]	>sp|Q63HK3|ZKSC2_HUMAN Zinc finger protein with KRAB and SCAN domains 2 OS=Homo sapiens GN=ZKSCAN2 PE=1 SV=2	Q.QVSS[+79.966]PVHREK.H	TRUE	10	Q63HK3	ZKSCAN2	class I	EBV-LPD1
60737	M[+16], S[+80]	>sp|Q99996|AKAP9_HUMAN A-kinase anchor protein 9 OS=Homo sapiens GN=AKAP9 PE=1 SV=3	V.QES[+79.966]KKACM[+15.995]F.E	TRUE	9	Q99996	AKAP9	class I	EBV-LPD1
60771	S[+80]	>sp|Q9NS56|TOPRS_HUMAN E3 ubiquitin-protein ligase Topors OS=Homo sapiens GN=TOPORS PE=1 SV=1	D.RVYS[+79.966]PYNHR.H	TRUE	9	Q9NS56	TOPORS	class I	EBV-LPD1
60772	S[+80]	>sp|Q9NS56|TOPRS_HUMAN E3 ubiquitin-protein ligase Topors OS=Homo sapiens GN=TOPORS PE=1 SV=1	D.RVYS[+79.966]PYNHR.H	TRUE	9	Q9NS56	TOPORS	class I	EBV-LPD1
60869	S[+80]	>sp|Q96F46|I17RA_HUMAN Interleukin-17 receptor A OS=Homo sapiens GN=IL17RA PE=1 SV=2	Q.SVQS[+79.966]DQGYISR.S	TRUE	11	Q96F46	IL17RA	class I	EBV-LPD1
60901	S[+80]	>sp|Q63ZY6|NSN5C_HUMAN Putative methyltransferase NSUN5C OS=Homo sapiens GN=NSUN5P2 PE=5 SV=2	E.RTPS[+79.966]PAPKR.K	TRUE	9	Q63ZY6	NSUN5P2	class I	EBV-LPD1
60902	S[+80]	>sp|Q63ZY6|NSN5C_HUMAN Putative methyltransferase NSUN5C OS=Homo sapiens GN=NSUN5P2 PE=5 SV=2	E.RTPS[+79.966]PAPKR.K	TRUE	9	Q63ZY6	NSUN5P2	class I	EBV-LPD1
60903	S[+80]	>sp|Q63ZY6|NSN5C_HUMAN Putative methyltransferase NSUN5C OS=Homo sapiens GN=NSUN5P2 PE=5 SV=2	E.RTPS[+79.966]PAPKRK.K	TRUE	10	Q63ZY6	NSUN5P2	class I	EBV-LPD1
60904	S[+80]	>sp|Q63ZY6|NSN5C_HUMAN Putative methyltransferase NSUN5C OS=Homo sapiens GN=NSUN5P2 PE=5 SV=2	E.RTPS[+79.966]PAPKRK.K	TRUE	10	Q63ZY6	NSUN5P2	class I	EBV-LPD1
61159	S[+80]	>sp|P19838|NFKB1_HUMAN Nuclear factor NF-kappa-B p105 subunit OS=Homo sapiens GN=NFKB1 PE=1 SV=2	G.VETS[+79.966]FRKLSF.T	TRUE	10	P19838	NFKB1	class I	EBV-LPD1
61160	S[+80], T[+80]	>sp|P19838|NFKB1_HUMAN Nuclear factor NF-kappa-B p105 subunit OS=Homo sapiens GN=NFKB1 PE=1 SV=2	G.VET[+79.966]SFRKLS[+79.966]F.T	TRUE	10	P19838	NFKB1	class I	EBV-LPD1
61281	S[+80]	>sp|Q9UKV3|ACINU_HUMAN Apoptotic chromatin condensation inducer in the nucleus OS=Homo sapiens GN=ACIN1 PE=1 SV=2	S.RSHS[+79.966]PLRSK.Q	TRUE	9	Q9UKV3	ACIN1	class I	EBV-LPD1
61282	S[+80]	>sp|Q9UKV3|ACINU_HUMAN Apoptotic chromatin condensation inducer in the nucleus OS=Homo sapiens GN=ACIN1 PE=1 SV=2	S.RSHS[+79.966]PLRSK.Q	TRUE	9	Q9UKV3	ACIN1	class I	EBV-LPD1
61722	S[+80]	>sp|Q9UEY8|ADDG_HUMAN Gamma-adducin OS=Homo sapiens GN=ADD3 PE=1 SV=1	N.GETS[+79.966]PRTKITW.M	TRUE	11	Q9UEY8	ADD3	class I	EBV-LPD1
61776	S[+80]	>sp|O14929|HAT1_HUMAN Histone acetyltransferase type B catalytic subunit OS=Homo sapiens GN=HAT1 PE=1 SV=1	R.RLIS[+79.966]PYKKK.Q	TRUE	9	O14929	HAT1	class I	EBV-LPD1
61924	Y[+80]	>sp|Q13627|DYR1A_HUMAN Dual specificity tyrosine-phosphorylation-regulated kinase 1A OS=Homo sapiens GN=DYRK1A PE=1 SV=2	Q.RIYQY[+79.966]IQSR.F	TRUE	9	Q13627	DYRK1A	class I	EBV-LPD1
62020	S[+80]	>sp|P62280|RS11_HUMAN 40S ribosomal protein S11 OS=Homo sapiens GN=RPS11 PE=1 SV=3	G.RILS[+79.966]GVVTK.M	TRUE	9	P62280	RPS11	class I	EBV-LPD1
62055	T[+80]	>sp|O96028|NSD2_HUMAN Histone-lysine N-methyltransferase NSD2 OS=Homo sapiens GN=WHSC1 PE=1 SV=1	E.AEDT[+79.966]PRKRL.R	TRUE	9	O96028	WHSC1	class I	EBV-LPD1
62056	T[+80]	>sp|O96028|NSD2_HUMAN Histone-lysine N-methyltransferase NSD2 OS=Homo sapiens GN=WHSC1 PE=1 SV=1	E.AEDT[+79.966]PRKRL.R	TRUE	9	O96028	WHSC1	class I	EBV-LPD1
62481	S[+80]	>sp|Q8TC71|MIEAP_HUMAN Mitochondria-eating protein OS=Homo sapiens GN=SPATA18 PE=1 SV=1	S.RSAS[+79.966]PSTAVK.V	TRUE	10	Q8TC71	SPATA18	class I	EBV-LPD1
62867	S[+80]	>sp|Q9UN19|DAPP1_HUMAN Dual adapter for phosphotyrosine and 3-phosphotyrosine and 3-phosphoinositide OS=Homo sapiens GN=DAPP1 PE=1 SV=1	E.GTIRSRS[+79.966]FIFK.-	TRUE	11	Q9UN19	DAPP1	class I	EBV-LPD1
63172	S[+80]	>sp|Q13247|SRSF6_HUMAN Serine/arginine-rich splicing factor 6 OS=Homo sapiens GN=SRSF6 PE=1 SV=2	R.RSYS[+79.966]GSRSR.S	TRUE	9	Q13247	SRSF6	class I	EBV-LPD1
63175	S[+80]	>sp|Q9UGI6|KCNN3_HUMAN Small conductance calcium-activated potassium channel protein 3 OS=Homo sapiens GN=KCNN3 PE=2 SV=1	H.RQAS[+79.966]PLVHR.R	TRUE	9	Q9UGI6	KCNN3	class I	EBV-LPD1
63176	S[+80]	>sp|Q9UGI6|KCNN3_HUMAN Small conductance calcium-activated potassium channel protein 3 OS=Homo sapiens GN=KCNN3 PE=2 SV=1	H.RQAS[+79.966]PLVHR.R	TRUE	9	Q9UGI6	KCNN3	class I	EBV-LPD1
63213	S[+80]	>sp|Q6IQ19|CCSAP_HUMAN Centriole, cilia and spindle-associated protein OS=Homo sapiens GN=CCSAP PE=1 SV=2	K.AVKS[+79.966]PQRSSSK.I	TRUE	11	Q6IQ19	CCSAP	class I	EBV-LPD1
63292	T[+80]	>sp|Q659C4|LAR1B_HUMAN La-related protein 1B OS=Homo sapiens GN=LARP1B PE=1 SV=2	I.VTQT[+79.966]PPYVKK.H	TRUE	10	Q659C4	LARP1B	class I	EBV-LPD1
63293	T[+80]	>sp|Q659C4|LAR1B_HUMAN La-related protein 1B OS=Homo sapiens GN=LARP1B PE=1 SV=2	I.VTQT[+79.966]PPYVKK.H	TRUE	10	Q659C4	LARP1B	class I	EBV-LPD1
63294	T[+80]	>sp|Q659C4|LAR1B_HUMAN La-related protein 1B OS=Homo sapiens GN=LARP1B PE=1 SV=2	I.VTQT[+79.966]PPYVKK.H	TRUE	10	Q659C4	LARP1B	class I	EBV-LPD1
63452	M[+16], S[+80]	>sp|Q4G0N7|F229B_HUMAN Protein FAM229B OS=Homo sapiens GN=FAM229B PE=3 SV=1	G.KEM[+15.995]S[+79.966]PTRQL.R	TRUE	9	Q4G0N7	FAM229B	class I	EBV-LPD1
63831	S[+80]	>sp|Q9BXB4|OSB11_HUMAN Oxysterol-binding protein-related protein 11 OS=Homo sapiens GN=OSBPL11 PE=1 SV=2	S.SSNS[+79.966]PISQR.R	TRUE	9	Q9BXB4	OSBPL11	class I	EBV-LPD1
63881	S[+80]	>sp|Q76L83|ASXL2_HUMAN Putative Polycomb group protein ASXL2 OS=Homo sapiens GN=ASXL2 PE=1 SV=1	G.KVIS[+79.966]PSQKHSK.K	TRUE	11	Q76L83	ASXL2	class I	EBV-LPD1
64132	S[+80]	>sp|Q9BX63|FANCJ_HUMAN Fanconi anemia group J protein OS=Homo sapiens GN=BRIP1 PE=1 SV=1	S.RSTS[+79.966]PTFNK.Q	TRUE	9	Q9BX63	BRIP1	class I	EBV-LPD1
64232	S[+80]	>sp|Q9UKI8|TLK1_HUMAN Serine/threonine-protein kinase tousled-like 1 OS=Homo sapiens GN=TLK1 PE=1 SV=2	Q.NESS[+79.966]QGKSI.G	TRUE	9	Q9UKI8	TLK1	class I	EBV-LPD1
64421	T[+80]	>sp|P36021|MOT8_HUMAN Monocarboxylate transporter 8 OS=Homo sapiens GN=SLC16A2 PE=1 SV=2	V.EEEFSEIKET[+79.966].W	TRUE	10	P36021	SLC16A2	class I	EBV-LPD1
64445	S[+80]	>sp|Q01804|OTUD4_HUMAN OTU domain-containing protein 4 OS=Homo sapiens GN=OTUD4 PE=1 SV=4	S.RTPS[+79.966]QIIRK.P	TRUE	9	Q01804	OTUD4	class I	EBV-LPD1
64474	S[+80]	>sp|Q9ULU4|PKCB1_HUMAN Protein kinase C-binding protein 1 OS=Homo sapiens GN=ZMYND8 PE=1 SV=2	D.TSTS[+79.966]PIKKK.K	TRUE	9	Q9ULU4	ZMYND8	class I	EBV-LPD1
64539	S[+80]	>sp|Q14693|LPIN1_HUMAN Phosphatidate phosphatase LPIN1 OS=Homo sapiens GN=LPIN1 PE=1 SV=2	M.KESS[+79.966]PLSSRKI.C	TRUE	11	Q14693	LPIN1	class I	EBV-LPD1
64564	S[+80]	>sp|Q9Y388|RBMX2_HUMAN RNA-binding motif protein, X-linked 2 OS=Homo sapiens GN=RBMX2 PE=1 SV=2	E.RESS[+79.966]NPSDRW.R	TRUE	10	Q9Y388	RBMX2	class I	EBV-LPD1
64590	S[+80]	>sp|P19532|TFE3_HUMAN Transcription factor E3 OS=Homo sapiens GN=TFE3 PE=1 SV=4	L.SSVS[+79.966]PAVSK.A	TRUE	9	P19532	TFE3	class I	EBV-LPD1
64597	T[+80]	>sp|Q9HA47|UCK1_HUMAN Uridine-cytidine kinase 1 OS=Homo sapiens GN=UCK1 PE=1 SV=1	F.EEFCLPT[+79.966]KKY.A	TRUE	10	Q9HA47	UCK1	class I	EBV-LPD1
64818	S[+80]	>sp|P35579|MYH9_HUMAN Myosin-9 OS=Homo sapiens GN=MYH9 PE=1 SV=4	D.GS[+79.966]DEEVDGKADGAEAKPAE.-	TRUE	19	P35579	MYH9	class I	EBV-LPD1
64965	M[+16], S[+80]	>sp|Q6ZTQ3|RASF6_HUMAN Ras association domain-containing protein 6 OS=Homo sapiens GN=RASSF6 PE=1 SV=1	Y.RTM[+15.995]S[+79.966]EAALVRK.R	TRUE	11	Q6ZTQ3	RASSF6	class I	EBV-LPD1
65109	S[+80]	>sp|O14974|MYPT1_HUMAN Protein phosphatase 1 regulatory subunit 12A OS=Homo sapiens GN=PPP1R12A PE=1 SV=1	Q.ATPTS[+79.966]PIKK.F	TRUE	9	O14974	PPP1R12A	class I	EBV-LPD1
66428	S[+80]	>sp|O75362|ZN217_HUMAN Zinc finger protein 217 OS=Homo sapiens GN=ZNF217 PE=1 SV=1	K.TSVS[+79.966]PAPDK.T	TRUE	9	O75362	ZNF217	class I	EBV-LPD1
66429	S[+80]	>sp|O75362|ZN217_HUMAN Zinc finger protein 217 OS=Homo sapiens GN=ZNF217 PE=1 SV=1	K.TSVS[+79.966]PAPDK.T	TRUE	9	O75362	ZNF217	class I	EBV-LPD1
66446	S[+80]	>sp|Q9H2X6|HIPK2_HUMAN Homeodomain-interacting protein kinase 2 OS=Homo sapiens GN=HIPK2 PE=1 SV=2	Q.AISS[+79.966]PQRSK.R	TRUE	9	Q9H2X6	HIPK2	class I	EBV-LPD1
66447	S[+80]	>sp|Q9H2X6|HIPK2_HUMAN Homeodomain-interacting protein kinase 2 OS=Homo sapiens GN=HIPK2 PE=1 SV=2	Q.AISS[+79.966]PQRSK.R	TRUE	9	Q9H2X6	HIPK2	class I	EBV-LPD1
66528	S[+80]	>sp|Q14241|ELOA1_HUMAN Transcription elongation factor B polypeptide 3 OS=Homo sapiens GN=TCEB3 PE=1 SV=2	S.RSYS[+79.966]PDHRQK.K	TRUE	10	Q14241	TCEB3	class I	EBV-LPD1
66542	S[+80]	>sp|Q8IYB3|SRRM1_HUMAN Serine/arginine repetitive matrix protein 1 OS=Homo sapiens GN=SRRM1 PE=1 SV=2	S.RSPS[+79.966]PAPEK.K	TRUE	9	Q8IYB3	SRRM1	class I	EBV-LPD1
66543	S[+80]	>sp|Q8IYB3|SRRM1_HUMAN Serine/arginine repetitive matrix protein 1 OS=Homo sapiens GN=SRRM1 PE=1 SV=2	S.RSPS[+79.966]PAPEK.K	TRUE	9	Q8IYB3	SRRM1	class I	EBV-LPD1
66544	S[+80]	>sp|Q8IYB3|SRRM1_HUMAN Serine/arginine repetitive matrix protein 1 OS=Homo sapiens GN=SRRM1 PE=1 SV=2	R.RTAS[+79.966]PPPPPK.R	TRUE	10	Q8IYB3	SRRM1	class I	EBV-LPD1
66697	S[+80]	>sp|Q13243|SRSF5_HUMAN Serine/arginine-rich splicing factor 5 OS=Homo sapiens GN=SRSF5 PE=1 SV=1	R.SVSRS[+79.966]PVPEK.S	TRUE	10	Q13243	SRSF5	class I	EBV-LPD1
66734	T[+80]	>sp|Q53GL0|PKHO1_HUMAN Pleckstrin homology domain-containing family O member 1 OS=Homo sapiens GN=PLEKHO1 PE=1 SV=2	G.ATYT[+79.966]PQAPK.K	TRUE	9	Q53GL0	PLEKHO1	class I	EBV-LPD1
66914	S[+80]	>sp|Q86XP3|DDX42_HUMAN ATP-dependent RNA helicase DDX42 OS=Homo sapiens GN=DDX42 PE=1 SV=1	P.AENS[+79.966]PTRQQF.H	TRUE	10	Q86XP3	DDX42	class I	EBV-LPD1
67153	S[+80]	>sp|Q5VYV7|SLX4I_HUMAN Protein SLX4IP OS=Homo sapiens GN=SLX4IP PE=1 SV=1	L.STIQNS[+79.966]PTKK.R	TRUE	10	Q5VYV7	SLX4IP	class I	EBV-LPD1
67192	M[+16], S[+80]	>sp|P55196|AFAD_HUMAN Afadin OS=Homo sapiens GN=MLLT4 PE=1 SV=3	T.RTIS[+79.966]NPEVVM[+15.995]K.R	TRUE	11	P55196	MLLT4	class I	EBV-LPD1
67289	T[+80]	>sp|Q9BQI3|E2AK1_HUMAN Eukaryotic translation initiation factor 2-alpha kinase 1 OS=Homo sapiens GN=EIF2AK1 PE=1 SV=2	F.AEPT[+79.966]PEKEKRF.G	TRUE	11	Q9BQI3	EIF2AK1	class I	EBV-LPD1
67569	S[+80]	>tr|A0A087WYJ0|A0A087WYJ0_HUMAN Small conductance calcium-activated potassium channel protein 3 OS=Homo sapiens GN=KCNN3 PE=1 SV=1	H.RQAS[+79.966]PLVHR.R	TRUE	9	A0A087WYJ0	KCNN3	class I	EBV-LPD1
67570	S[+80]	>tr|A0A087WYJ0|A0A087WYJ0_HUMAN Small conductance calcium-activated potassium channel protein 3 OS=Homo sapiens GN=KCNN3 PE=1 SV=1	H.RQAS[+79.966]PLVHR.R	TRUE	9	A0A087WYJ0	KCNN3	class I	EBV-LPD1
67613	S[+80]	>sp|Q9UKV3|ACINU_HUMAN Apoptotic chromatin condensation inducer in the nucleus OS=Homo sapiens GN=ACIN1 PE=1 SV=2	S.RSHS[+79.966]PLRSK.Q	TRUE	9	Q9UKV3	ACIN1	class I	EBV-LPD1
67614	S[+80]	>sp|Q9UKV3|ACINU_HUMAN Apoptotic chromatin condensation inducer in the nucleus OS=Homo sapiens GN=ACIN1 PE=1 SV=2	S.RSHS[+79.966]PLRSK.Q	TRUE	9	Q9UKV3	ACIN1	class I	EBV-LPD1
67770	S[+80]	>sp|Q9UKJ3|GPTC8_HUMAN G patch domain-containing protein 8 OS=Homo sapiens GN=GPATCH8 PE=1 SV=2	P.GSGS[+79.966]PAPPR.R	TRUE	9	Q9UKJ3	GPATCH8	class I	EBV-LPD1
67775	T[+80]	>sp|Q659C4|LAR1B_HUMAN La-related protein 1B OS=Homo sapiens GN=LARP1B PE=1 SV=2	I.VTQT[+79.966]PPYVKK.H	TRUE	10	Q659C4	LARP1B	class I	EBV-LPD1
67829	S[+80]	>sp|Q8IWI9|MGAP_HUMAN MAX gene-associated protein OS=Homo sapiens GN=MGA PE=1 SV=3	S.SVSS[+79.966]PVKSK.G	TRUE	9	Q8IWI9	MGA	class I	EBV-LPD1
67864	S[+80]	>sp|Q9BXB4|OSB11_HUMAN Oxysterol-binding protein-related protein 11 OS=Homo sapiens GN=OSBPL11 PE=1 SV=2	S.SSNS[+79.966]PISQR.R	TRUE	9	Q9BXB4	OSBPL11	class I	EBV-LPD1
67953	S[+80]	>sp|P19532|TFE3_HUMAN Transcription factor E3 OS=Homo sapiens GN=TFE3 PE=1 SV=4	L.SSVS[+79.966]PAVSK.A	TRUE	9	P19532	TFE3	class I	EBV-LPD1
68068	S[+80]	>sp|O14929|HAT1_HUMAN Histone acetyltransferase type B catalytic subunit OS=Homo sapiens GN=HAT1 PE=1 SV=1	R.RLIS[+79.966]PYKKK.Q	TRUE	9	O14929	HAT1	class I	EBV-LPD1
68181	S[+80]	>sp|Q9NS56|TOPRS_HUMAN E3 ubiquitin-protein ligase Topors OS=Homo sapiens GN=TOPORS PE=1 SV=1	D.RVYS[+79.966]PYNHR.H	TRUE	9	Q9NS56	TOPORS	class I	EBV-LPD1
69194	S[+80]	>sp|P62937|PPIA_HUMAN Peptidyl-prolyl cis-trans isomerase A OS=Homo sapiens GN=PPIA PE=1 SV=2	T.GGKS[+79.966]IYGEKFEDE.N	TRUE	13	P62937	PPIA	class II	EBV-LPD1
69198	S[+80]	>sp|P62937|PPIA_HUMAN Peptidyl-prolyl cis-trans isomerase A OS=Homo sapiens GN=PPIA PE=1 SV=2	T.GGKS[+79.966]IYGEKFEDEN.F	TRUE	14	P62937	PPIA	class II	EBV-LPD1
69199	S[+80]	>sp|P62937|PPIA_HUMAN Peptidyl-prolyl cis-trans isomerase A OS=Homo sapiens GN=PPIA PE=1 SV=2	T.GGKS[+79.966]IYGEKFEDEN.F	TRUE	14	P62937	PPIA	class II	EBV-LPD1
69208	S[+80]	>sp|P62937|PPIA_HUMAN Peptidyl-prolyl cis-trans isomerase A OS=Homo sapiens GN=PPIA PE=1 SV=2	T.GGKS[+79.966]IYGEKFEDENF.I	TRUE	15	P62937	PPIA	class II	EBV-LPD1
69223	S[+80]	>sp|P62937|PPIA_HUMAN Peptidyl-prolyl cis-trans isomerase A OS=Homo sapiens GN=PPIA PE=1 SV=2	G.KS[+79.966]IYGEKFEDEN.F	TRUE	12	P62937	PPIA	class II	EBV-LPD1
69401	S[+80]	>sp|Q9UBH6|XPR1_HUMAN Xenotropic and polytropic retrovirus receptor 1 OS=Homo sapiens GN=XPR1 PE=1 SV=1	Q.KNRS[+79.966]WKYNQSISLR.R	TRUE	14	Q9UBH6	XPR1	class II	EBV-LPD1
73049	M[+16], S[+80]	>sp|Q6ZTQ3|RASF6_HUMAN Ras association domain-containing protein 6 OS=Homo sapiens GN=RASSF6 PE=1 SV=1	Y.RTM[+15.995]S[+79.966]EAALVRK.R	TRUE	11	Q6ZTQ3	RASSF6	class II	EBV-LPD1
74515	S[+80]	>sp|Q86XP3|DDX42_HUMAN ATP-dependent RNA helicase DDX42 OS=Homo sapiens GN=DDX42 PE=1 SV=1	P.AENS[+79.966]PTRQQF.H	TRUE	10	Q86XP3	DDX42	class II	EBV-LPD1
74862	S[+80]	>sp|Q5VYV7|SLX4I_HUMAN Protein SLX4IP OS=Homo sapiens GN=SLX4IP PE=1 SV=1	L.STIQNS[+79.966]PTKK.R	TRUE	10	Q5VYV7	SLX4IP	class II	EBV-LPD1
75323	S[+80]	>sp|P14060|3BHS1_HUMAN 3 beta-hydroxysteroid dehydrogenase/Delta 5-->4-isomerase type 1 OS=Homo sapiens GN=HSD3B1 PE=1 SV=2	D.NLNYTLS[+79.966]KEFGLRLD.S	TRUE	15	P14060	HSD3B1	class II	EBV-LPD1
75325	Y[+80]	>sp|Q9UK99|FBX3_HUMAN F-box only protein 3 OS=Homo sapiens GN=FBXO3 PE=1 SV=3	G.PGVVGEFPIISPGRVY[+79.966].E	TRUE	16	Q9UK99	FBXO3	class II	EBV-LPD1
75331	S[+80]	>sp|O75362|ZN217_HUMAN Zinc finger protein 217 OS=Homo sapiens GN=ZNF217 PE=1 SV=1	K.TSVS[+79.966]PAPDK.T	TRUE	9	O75362	ZNF217	class II	EBV-LPD1
75342	S[+80]	>sp|Q9UKJ3|GPTC8_HUMAN G patch domain-containing protein 8 OS=Homo sapiens GN=GPATCH8 PE=1 SV=2	P.GSGS[+79.966]PAPPR.R	TRUE	9	Q9UKJ3	GPATCH8	class II	EBV-LPD1
75383	S[+80]	>sp|Q9UQ35|SRRM2_HUMAN Serine/arginine repetitive matrix protein 2 OS=Homo sapiens GN=SRRM2 PE=1 SV=2	D.ATAS[+79.966]PPRQK.D	TRUE	9	Q9UQ35	SRRM2	class II	EBV-LPD1
75877	S[+80]	>sp|P62937|PPIA_HUMAN Peptidyl-prolyl cis-trans isomerase A OS=Homo sapiens GN=PPIA PE=1 SV=2	T.GGKS[+79.966]IYGEKFEDEN.F	TRUE	14	P62937	PPIA	class II	EBV-LPD1
76946	Y[+80]	>sp|Q9UK99|FBX3_HUMAN F-box only protein 3 OS=Homo sapiens GN=FBXO3 PE=1 SV=3	G.PGVVGEFPIISPGRVY[+79.966].E	TRUE	16	Q9UK99	FBXO3	class II	EBV-LPD1
77009	S[+80]	>sp|Q9GZV9|FGF23_HUMAN Fibroblast growth factor 23 OS=Homo sapiens GN=FGF23 PE=1 SV=1	S.MSVLRAYPNAS[+79.966]P.L	TRUE	12	Q9GZV9	FGF23	class II	EBV-LPD1
77391	S[+80]	>sp|Q9UQ35|SRRM2_HUMAN Serine/arginine repetitive matrix protein 2 OS=Homo sapiens GN=SRRM2 PE=1 SV=2	D.ATAS[+79.966]PPRQK.D	TRUE	9	Q9UQ35	SRRM2	class I	BLCL HD2
77392	S[+80]	>sp|Q9UQ35|SRRM2_HUMAN Serine/arginine repetitive matrix protein 2 OS=Homo sapiens GN=SRRM2 PE=1 SV=2	D.ATAS[+79.966]PPRQK.D	TRUE	9	Q9UQ35	SRRM2	class I	BLCL HD2
77575	S[+80]	>sp|P21333|FLNA_HUMAN Filamin-A OS=Homo sapiens GN=FLNA PE=1 SV=4	Q.ATPTS[+79.966]PIRVK.V	TRUE	10	P21333	FLNA	class I	BLCL HD2
77761	S[+80]	>sp|P78347|GTF2I_HUMAN General transcription factor II-I OS=Homo sapiens GN=GTF2I PE=1 SV=2	K.RPRS[+79.966]PGSNSKV.P	TRUE	11	P78347	GTF2I	class I	BLCL HD2
78334	S[+80]	>sp|Q8WUA4|TF3C2_HUMAN General transcription factor 3C polypeptide 2 OS=Homo sapiens GN=GTF3C2 PE=1 SV=2	P.KVSS[+79.966]PTKPK.K	TRUE	9	Q8WUA4	GTF3C2	class I	BLCL HD2
78442	T[+80]	>sp|P33241|LSP1_HUMAN Lymphocyte-specific protein 1 OS=Homo sapiens GN=LSP1 PE=1 SV=1	Q.QPRT[+79.966]PSPLVL.E	TRUE	10	P33241	LSP1	class I	BLCL HD2
78443	T[+80]	>sp|P33241|LSP1_HUMAN Lymphocyte-specific protein 1 OS=Homo sapiens GN=LSP1 PE=1 SV=1	Q.QPRT[+79.966]PSPLVL.E	TRUE	10	P33241	LSP1	class I	BLCL HD2
78445	S[+80]	>sp|P33241|LSP1_HUMAN Lymphocyte-specific protein 1 OS=Homo sapiens GN=LSP1 PE=1 SV=1	A.RQAS[+79.966]IELPSM.A	TRUE	10	P33241	LSP1	class I	BLCL HD2
78446	M[+16], S[+80]	>sp|P33241|LSP1_HUMAN Lymphocyte-specific protein 1 OS=Homo sapiens GN=LSP1 PE=1 SV=1	A.RQAS[+79.966]IELPSM[+15.995].A	TRUE	10	P33241	LSP1	class I	BLCL HD2
78465	S[+80]	>sp|O75179|ANR17_HUMAN Ankyrin repeat domain-containing protein 17 OS=Homo sapiens GN=ANKRD17 PE=1 SV=3	G.SPSS[+79.966]PSVRRQL.F	TRUE	11	O75179	ANKRD17	class I	BLCL HD2
78617	S[+80]	>tr|B4DSP0|B4DSP0_HUMAN HCG1642748, isoform CRA_b OS=Homo sapiens GN=PEG10 PE=1 SV=1	R.KPRS[+79.966]PPRAL.V	TRUE	9	B4DSP0	PEG10	class I	BLCL HD2
78618	S[+80]	>tr|B4DSP0|B4DSP0_HUMAN HCG1642748, isoform CRA_b OS=Homo sapiens GN=PEG10 PE=1 SV=1	R.KPRS[+79.966]PPRAL.V	TRUE	9	B4DSP0	PEG10	class I	BLCL HD2
78619	S[+80]	>tr|B4DSP0|B4DSP0_HUMAN HCG1642748, isoform CRA_b OS=Homo sapiens GN=PEG10 PE=1 SV=1	R.KPRS[+79.966]PPRAL.V	TRUE	9	B4DSP0	PEG10	class I	BLCL HD2
78620	S[+80]	>tr|B4DSP0|B4DSP0_HUMAN HCG1642748, isoform CRA_b OS=Homo sapiens GN=PEG10 PE=1 SV=1	R.KPRS[+79.966]PPRAL.V	TRUE	9	B4DSP0	PEG10	class I	BLCL HD2
78623	S[+80]	>tr|B4DSP0|B4DSP0_HUMAN HCG1642748, isoform CRA_b OS=Homo sapiens GN=PEG10 PE=1 SV=1	R.KPRS[+79.966]PPRALVL.P	TRUE	11	B4DSP0	PEG10	class I	BLCL HD2
78624	S[+80]	>tr|B4DSP0|B4DSP0_HUMAN HCG1642748, isoform CRA_b OS=Homo sapiens GN=PEG10 PE=1 SV=1	R.KPRS[+79.966]PPRALVL.P	TRUE	11	B4DSP0	PEG10	class I	BLCL HD2
78750	T[+80]	>sp|P42695|CNDD3_HUMAN Condensin-2 complex subunit D3 OS=Homo sapiens GN=NCAPD3 PE=1 SV=2	I.GTPRT[+79.966]PSSAK.E	TRUE	10	P42695	NCAPD3	class I	BLCL HD2
79623	S[+80]	>sp|Q5JXC2|MIIP_HUMAN Migration and invasion-inhibitory protein OS=Homo sapiens GN=MIIP PE=1 SV=3	G.RPRPHS[+79.966]APSL.G	TRUE	10	Q5JXC2	MIIP	class I	BLCL HD2
79784	S[+80]	>sp|Q8IWI9|MGAP_HUMAN MAX gene-associated protein OS=Homo sapiens GN=MGA PE=1 SV=3	S.SVSS[+79.966]PVKSK.G	TRUE	9	Q8IWI9	MGA	class I	BLCL HD2
79945	S[+80]	>sp|Q13111|CAF1A_HUMAN Chromatin assembly factor 1 subunit A OS=Homo sapiens GN=CHAF1A PE=1 SV=2	G.SPRS[+79.966]PSTTYL.H	TRUE	10	Q13111	CHAF1A	class I	BLCL HD2
79958	S[+80]	>sp|Q12802|AKP13_HUMAN A-kinase anchor protein 13 OS=Homo sapiens GN=AKAP13 PE=1 SV=2	R.RTES[+79.966]DSGLKK.G	TRUE	10	Q12802	AKAP13	class I	BLCL HD2
80021	S[+80]	>sp|Q96PK6|RBM14_HUMAN RNA-binding protein 14 OS=Homo sapiens GN=RBM14 PE=1 SV=2	S.FRRS[+79.966]PTKSSL.D	TRUE	10	Q96PK6	RBM14	class I	BLCL HD2
80259	S[+80]	>sp|Q6JBY9|CPZIP_HUMAN CapZ-interacting protein OS=Homo sapiens GN=RCSD1 PE=1 SV=1	A.SPKS[+79.966]PGLKA.M	TRUE	9	Q6JBY9	RCSD1	class I	BLCL HD2
80260	S[+80]	>sp|Q6JBY9|CPZIP_HUMAN CapZ-interacting protein OS=Homo sapiens GN=RCSD1 PE=1 SV=1	A.SPKS[+79.966]PGLKA.M	TRUE	9	Q6JBY9	RCSD1	class I	BLCL HD2
80281	S[+80]	>sp|Q9H211|CDT1_HUMAN DNA replication factor Cdt1 OS=Homo sapiens GN=CDT1 PE=1 SV=3	S.SPGS[+79.966]PRPAL.P	TRUE	9	Q9H211	CDT1	class I	BLCL HD2
80282	S[+80]	>sp|Q9H211|CDT1_HUMAN DNA replication factor Cdt1 OS=Homo sapiens GN=CDT1 PE=1 SV=3	S.SPGS[+79.966]PRPAL.P	TRUE	9	Q9H211	CDT1	class I	BLCL HD2
80286	S[+80]	>sp|Q9GZN2|TGIF2_HUMAN Homeobox protein TGIF2 OS=Homo sapiens GN=TGIF2 PE=1 SV=1	A.LPRGSS[+79.966]PSVL.A	TRUE	10	Q9GZN2	TGIF2	class I	BLCL HD2
80520	S[+80]	>sp|P11836|CD20_HUMAN B-lymphocyte antigen CD20 OS=Homo sapiens GN=MS4A1 PE=1 SV=1	S.RPKS[+79.966]NIVLL.S	TRUE	9	P11836	MS4A1	class I	BLCL HD2
80809	S[+80]	>sp|Q12815|TROAP_HUMAN Tastin OS=Homo sapiens GN=TROAP PE=1 SV=3	L.RGVS[+79.966]PTPSK.I	TRUE	9	Q12815	TROAP	class I	BLCL HD2
80950	S[+80]	>sp|P49757|NUMB_HUMAN Protein numb homolog OS=Homo sapiens GN=NUMB PE=1 SV=2	M.SPFKRQLS[+79.966]L.R	TRUE	9	P49757	NUMB	class I	BLCL HD2
81044	S[+80]	>sp|Q9H2X6|HIPK2_HUMAN Homeodomain-interacting protein kinase 2 OS=Homo sapiens GN=HIPK2 PE=1 SV=2	Q.AISS[+79.966]PQRSK.R	TRUE	9	Q9H2X6	HIPK2	class I	BLCL HD2
81119	T[+80]	>sp|Q13118|KLF10_HUMAN Krueppel-like factor 10 OS=Homo sapiens GN=KLF10 PE=1 SV=1	N.RPVT[+79.966]PVSDL.S	TRUE	9	Q13118	KLF10	class I	BLCL HD2
81124	M[+16], S[+80]	>sp|O94855|SC24D_HUMAN Protein transport protein Sec24D OS=Homo sapiens GN=SEC24D PE=1 SV=2	S.HTAS[+79.966]PTGMM[+15.995]K.P	TRUE	10	O94855	SEC24D	class I	BLCL HD2
81255	S[+80]	>sp|Q9UKJ3|GPTC8_HUMAN G patch domain-containing protein 8 OS=Homo sapiens GN=GPATCH8 PE=1 SV=2	P.GSGS[+79.966]PAPPR.R	TRUE	9	Q9UKJ3	GPATCH8	class I	BLCL HD2
81415	S[+80]	>sp|Q9NYV4|CDK12_HUMAN Cyclin-dependent kinase 12 OS=Homo sapiens GN=CDK12 PE=1 SV=2	S.SPFLSKRS[+79.966]L.S	TRUE	9	Q9NYV4	CDK12	class I	BLCL HD2
81837	S[+80]	>sp|Q9BQG0|MBB1A_HUMAN Myb-binding protein 1A OS=Homo sapiens GN=MYBBP1A PE=1 SV=2	S.ATQS[+79.966]PISKK.R	TRUE	9	Q9BQG0	MYBBP1A	class I	BLCL HD2
81874	S[+80]	>sp|P25098|ARBK1_HUMAN Beta-adrenergic receptor kinase 1 OS=Homo sapiens GN=ADRBK1 PE=1 SV=2	N.KPRS[+79.966]PVVEL.S	TRUE	9	P25098	ADRBK1	class I	BLCL HD2
81875	S[+80]	>sp|P25098|ARBK1_HUMAN Beta-adrenergic receptor kinase 1 OS=Homo sapiens GN=ADRBK1 PE=1 SV=2	N.KPRS[+79.966]PVVEL.S	TRUE	9	P25098	ADRBK1	class I	BLCL HD2
82185	S[+80]	>sp|O14974|MYPT1_HUMAN Protein phosphatase 1 regulatory subunit 12A OS=Homo sapiens GN=PPP1R12A PE=1 SV=1	Q.ATPTS[+79.966]PIKK.F	TRUE	9	O14974	PPP1R12A	class I	BLCL HD2
82208	S[+80]	>sp|Q9Y4H4|GPSM3_HUMAN G-protein-signaling modulator 3 OS=Homo sapiens GN=GPSM3 PE=1 SV=1	L.GPRSASLLS[+79.966]L.Q	TRUE	10	Q9Y4H4	GPSM3	class I	BLCL HD2
82561	S[+80]	>sp|Q9BXL7|CAR11_HUMAN Caspase recruitment domain-containing protein 11 OS=Homo sapiens GN=CARD11 PE=1 SV=3	Q.RAKS[+79.966]PISLK.R	TRUE	9	Q9BXL7	CARD11	class I	BLCL HD2
82624	S[+80]	>sp|Q96I25|SPF45_HUMAN Splicing factor 45 OS=Homo sapiens GN=RBM17 PE=1 SV=1	D.RPRS[+79.966]PTGPSNSFL.A	TRUE	13	Q96I25	RBM17	class I	BLCL HD2
82663	S[+80]	>sp|Q86V48|LUZP1_HUMAN Leucine zipper protein 1 OS=Homo sapiens GN=LUZP1 PE=1 SV=2	Q.RPFS[+79.966]PREAL.R	TRUE	9	Q86V48	LUZP1	class I	BLCL HD2
82836	S[+80]	>sp|Q99700|ATX2_HUMAN Ataxin-2 OS=Homo sapiens GN=ATXN2 PE=1 SV=2	H.RPRS[+79.966]PRQNSI.G	TRUE	10	Q99700	ATXN2	class I	BLCL HD2
82837	S[+80]	>sp|Q99700|ATX2_HUMAN Ataxin-2 OS=Homo sapiens GN=ATXN2 PE=1 SV=2	H.RPRS[+79.966]PRQNSI.G	TRUE	10	Q99700	ATXN2	class I	BLCL HD2
82843	S[+80]	>sp|P17275|JUNB_HUMAN Transcription factor jun-B OS=Homo sapiens GN=JUNB PE=1 SV=1	S.PASASS[+79.966]GGAGAA.V	TRUE	12	P17275	JUNB	class I	BLCL HD2
83058	S[+80]	>tr|A0A087WVL5|A0A087WVL5_HUMAN BCL2/adenovirus E1B 19 kDa protein-interacting protein 3-like OS=Homo sapiens GN=BNIP3L PE=1 SV=1	R.HPKRSVS[+79.966]L.S	TRUE	8	A0A087WVL5	BNIP3L	class I	BLCL HD2
83541	S[+80]	>sp|P57059|SIK1_HUMAN Serine/threonine-protein kinase SIK1 OS=Homo sapiens GN=SIK1 PE=1 SV=2	F.RPRPVS[+79.966]PSSL.L	TRUE	10	P57059	SIK1	class I	BLCL HD2
83542	S[+80]	>sp|P57059|SIK1_HUMAN Serine/threonine-protein kinase SIK1 OS=Homo sapiens GN=SIK1 PE=1 SV=2	F.RPRPVS[+79.966]PSSL.L	TRUE	10	P57059	SIK1	class I	BLCL HD2
83543	S[+80]	>sp|P57059|SIK1_HUMAN Serine/threonine-protein kinase SIK1 OS=Homo sapiens GN=SIK1 PE=1 SV=2	F.RPRPVS[+79.966]PSSL.L	TRUE	10	P57059	SIK1	class I	BLCL HD2
83544	S[+80]	>sp|P57059|SIK1_HUMAN Serine/threonine-protein kinase SIK1 OS=Homo sapiens GN=SIK1 PE=1 SV=2	F.RPRPVS[+79.966]PSSL.L	TRUE	10	P57059	SIK1	class I	BLCL HD2
83762	S[+80]	>sp|Q14493|SLBP_HUMAN Histone RNA hairpin-binding protein OS=Homo sapiens GN=SLBP PE=1 SV=1	C.RPRS[+79.966]PPRHQ.S	TRUE	9	Q14493	SLBP	class I	BLCL HD2
83763	S[+80]	>sp|Q14493|SLBP_HUMAN Histone RNA hairpin-binding protein OS=Homo sapiens GN=SLBP PE=1 SV=1	C.RPRS[+79.966]PPRHQ.S	TRUE	9	Q14493	SLBP	class I	BLCL HD2
83764	S[+80]	>sp|Q14493|SLBP_HUMAN Histone RNA hairpin-binding protein OS=Homo sapiens GN=SLBP PE=1 SV=1	C.RPRS[+79.966]PPRHQ.S	TRUE	9	Q14493	SLBP	class I	BLCL HD2
84205	S[+80]	>sp|Q9NPB0|SMDC1_HUMAN SAYSvFN domain-containing protein 1 OS=Homo sapiens GN=SAYSD1 PE=2 SV=1	P.RPAS[+79.966]ARAQPGL.V	TRUE	11	Q9NPB0	SAYSD1	class I	BLCL HD2
84319	S[+80]	>sp|Q76L83|ASXL2_HUMAN Putative Polycomb group protein ASXL2 OS=Homo sapiens GN=ASXL2 PE=1 SV=1	G.KVIS[+79.966]PSQKHSK.K	TRUE	11	Q76L83	ASXL2	class I	BLCL HD2
84379	S[+80]	>sp|M0R1G4|YA044_HUMAN Uncharacterized protein ENSP00000471857 OS=Homo sapiens PE=2 SV=1	Q.RAAS[+79.966]PRLGKA.A	TRUE	10	M0R1G4		class I	BLCL HD2
85332	T[+80]	>sp|Q13571|LAPM5_HUMAN Lysosomal-associated transmembrane protein 5 OS=Homo sapiens GN=LAPTM5 PE=1 SV=1	V.VLPSYEEALSLPSKT[+79.966]PEG.G	TRUE	18	Q13571	LAPTM5	class II	BLCL HD2
85353	S[+80]	>sp|Q13571|LAPM5_HUMAN Lysosomal-associated transmembrane protein 5 OS=Homo sapiens GN=LAPTM5 PE=1 SV=1	V.LPS[+79.966]YEEALSLPSKTPE.G	TRUE	16	Q13571	LAPTM5	class II	BLCL HD2
85354	T[+80]	>sp|Q13571|LAPM5_HUMAN Lysosomal-associated transmembrane protein 5 OS=Homo sapiens GN=LAPTM5 PE=1 SV=1	V.LPSYEEALSLPSKT[+79.966]PE.G	TRUE	16	Q13571	LAPTM5	class II	BLCL HD2
85355	T[+80]	>sp|Q13571|LAPM5_HUMAN Lysosomal-associated transmembrane protein 5 OS=Homo sapiens GN=LAPTM5 PE=1 SV=1	V.LPSYEEALSLPSKT[+79.966]PE.G	TRUE	16	Q13571	LAPTM5	class II	BLCL HD2
85363	T[+80]	>sp|Q13571|LAPM5_HUMAN Lysosomal-associated transmembrane protein 5 OS=Homo sapiens GN=LAPTM5 PE=1 SV=1	V.LPSYEEALSLPSKT[+79.966]PEG.G	TRUE	17	Q13571	LAPTM5	class II	BLCL HD2
86996	T[+80]	>sp|Q7Z6A9|BTLA_HUMAN B- and T-lymphocyte attenuator OS=Homo sapiens GN=BTLA PE=1 SV=3	L.VDAHLKSEQTEAST[+79.966]RQN.S	TRUE	17	Q7Z6A9	BTLA	class II	BLCL HD2
88320	S[+80]	>sp|Q9NYA4|MTMR4_HUMAN Myotubularin-related protein 4 OS=Homo sapiens GN=MTMR4 PE=1 SV=2	E.GPPS[+79.966]LEYIQAKDLFPP.K	TRUE	16	Q9NYA4	MTMR4	class II	BLCL HD2
88415	S[+80]	>sp|Q08334|I10R2_HUMAN Interleukin-10 receptor subunit beta OS=Homo sapiens GN=IL10RB PE=1 SV=2	F.DKLS[+79.966]VIAEDSESGKQNP.G	TRUE	17	Q08334	IL10RB	class II	BLCL HD2
88419	S[+80]	>sp|Q08334|I10R2_HUMAN Interleukin-10 receptor subunit beta OS=Homo sapiens GN=IL10RB PE=1 SV=2	F.DKLS[+79.966]VIAEDSESGKQNPG.D	TRUE	18	Q08334	IL10RB	class II	BLCL HD2
88420	S[+80]	>sp|Q08334|I10R2_HUMAN Interleukin-10 receptor subunit beta OS=Homo sapiens GN=IL10RB PE=1 SV=2	F.DKLS[+79.966]VIAEDSESGKQNPG.D	TRUE	18	Q08334	IL10RB	class II	BLCL HD2
88421	S[+80]	>sp|Q08334|I10R2_HUMAN Interleukin-10 receptor subunit beta OS=Homo sapiens GN=IL10RB PE=1 SV=2	D.KLS[+79.966]VIAEDSESGKQNPG.D	TRUE	17	Q08334	IL10RB	class II	BLCL HD2
89239	S[+80]	>sp|Q12912|LRMP_HUMAN Lymphoid-restricted membrane protein OS=Homo sapiens GN=LRMP PE=1 SV=3	S.AS[+79.966]PTIEAQGTSPAHDN.I	TRUE	16	Q12912	LRMP	class II	BLCL HD2
90082	S[+80]	>sp|Q9UQ35|SRRM2_HUMAN Serine/arginine repetitive matrix protein 2 OS=Homo sapiens GN=SRRM2 PE=1 SV=2	D.ATAS[+79.966]PPRQK.D	TRUE	9	Q9UQ35	SRRM2	class II	BLCL HD2
90759	S[+80]	>sp|Q5VYV7|SLX4I_HUMAN Protein SLX4IP OS=Homo sapiens GN=SLX4IP PE=1 SV=1	L.STIQNS[+79.966]PTKK.R	TRUE	10	Q5VYV7	SLX4IP	class II	BLCL HD2
90760	S[+80]	>sp|Q5VYV7|SLX4I_HUMAN Protein SLX4IP OS=Homo sapiens GN=SLX4IP PE=1 SV=1	L.STIQNS[+79.966]PTKK.R	TRUE	10	Q5VYV7	SLX4IP	class II	BLCL HD2
91393	S[+80]	>sp|Q9UQ35|SRRM2_HUMAN Serine/arginine repetitive matrix protein 2 OS=Homo sapiens GN=SRRM2 PE=1 SV=2	D.ATAS[+79.966]PPRQK.D	TRUE	9	Q9UQ35	SRRM2	class I	Healthy B HD3
91394	S[+80]	>sp|Q9UQ35|SRRM2_HUMAN Serine/arginine repetitive matrix protein 2 OS=Homo sapiens GN=SRRM2 PE=1 SV=2	D.ATAS[+79.966]PPRQK.D	TRUE	9	Q9UQ35	SRRM2	class I	Healthy B HD3
91454	S[+80]	>sp|Q6JBY9|CPZIP_HUMAN CapZ-interacting protein OS=Homo sapiens GN=RCSD1 PE=1 SV=1	A.SPKS[+79.966]PGLKA.M	TRUE	9	Q6JBY9	RCSD1	class I	Healthy B HD3
91455	S[+80]	>sp|Q6JBY9|CPZIP_HUMAN CapZ-interacting protein OS=Homo sapiens GN=RCSD1 PE=1 SV=1	A.SPKS[+79.966]PGLKA.M	TRUE	9	Q6JBY9	RCSD1	class I	Healthy B HD3
91475	S[+80]	>sp|Q13243|SRSF5_HUMAN Serine/arginine-rich splicing factor 5 OS=Homo sapiens GN=SRSF5 PE=1 SV=1	R.SVSRS[+79.966]PVPEK.S	TRUE	10	Q13243	SRSF5	class I	Healthy B HD3
92566	S[+80]	>sp|Q9Y4E1|FA21C_HUMAN WASH complex subunit FAM21C OS=Homo sapiens GN=FAM21C PE=1 SV=3	S.RPTS[+79.966]FADEL.A	TRUE	9	Q9Y4E1	FAM21C	class I	Healthy B HD3
92632	S[+80]	>sp|Q9H2X6|HIPK2_HUMAN Homeodomain-interacting protein kinase 2 OS=Homo sapiens GN=HIPK2 PE=1 SV=2	Q.AISS[+79.966]PQRSK.R	TRUE	9	Q9H2X6	HIPK2	class I	Healthy B HD3
93389	T[+80]	>sp|P62140|PP1B_HUMAN Serine/threonine-protein phosphatase PP1-beta catalytic subunit OS=Homo sapiens GN=PPP1CB PE=1 SV=3	G.RPVT[+79.966]PPRTA.N	TRUE	9	P62140	PPP1CB	class I	Healthy B HD3
93536	S[+80]	>sp|Q8IWI9|MGAP_HUMAN MAX gene-associated protein OS=Homo sapiens GN=MGA PE=1 SV=3	S.SVSS[+79.966]PVKSK.G	TRUE	9	Q8IWI9	MGA	class I	Healthy B HD3
93581	S[+80]	>sp|P61978|HNRPK_HUMAN Heterogeneous nuclear ribonucleoprotein K OS=Homo sapiens GN=HNRNPK PE=1 SV=1	Q.LPS[+79.966]PTATSQL.P	TRUE	10	P61978	HNRNPK	class I	Healthy B HD3
93625	T[+80]	>sp|P62995|TRA2B_HUMAN Transformer-2 protein homolog beta OS=Homo sapiens GN=TRA2B PE=1 SV=1	K.RPHT[+79.966]PTPGI.Y	TRUE	9	P62995	TRA2B	class I	Healthy B HD3
93714	S[+80]	>sp|Q9UGP5|DPOLL_HUMAN DNA polymerase lambda OS=Homo sapiens GN=POLL PE=1 SV=1	T.RPVS[+79.966]PPQKA.K	TRUE	9	Q9UGP5	POLL	class I	Healthy B HD3
93715	S[+80]	>sp|Q9UGP5|DPOLL_HUMAN DNA polymerase lambda OS=Homo sapiens GN=POLL PE=1 SV=1	T.RPVS[+79.966]PPQKA.K	TRUE	9	Q9UGP5	POLL	class I	Healthy B HD3
93722	S[+80]	>sp|Q9UKJ3|GPTC8_HUMAN G patch domain-containing protein 8 OS=Homo sapiens GN=GPATCH8 PE=1 SV=2	P.GSGS[+79.966]PAPPR.R	TRUE	9	Q9UKJ3	GPATCH8	class I	Healthy B HD3
93751	S[+80]	>sp|Q5VYV7|SLX4I_HUMAN Protein SLX4IP OS=Homo sapiens GN=SLX4IP PE=1 SV=1	L.STIQNS[+79.966]PTKK.R	TRUE	10	Q5VYV7	SLX4IP	class I	Healthy B HD3
93968	S[+80]	>sp|Q9Y4F3|MARF1_HUMAN Meiosis arrest female protein 1 OS=Homo sapiens GN=KIAA0430 PE=1 SV=6	S.VTSS[+79.966]PVEKK.D	TRUE	9	Q9Y4F3	KIAA0430	class I	Healthy B HD3
96283	S[+80]	>sp|Q8NDB2|BANK1_HUMAN B-cell scaffold protein with ankyrin repeats OS=Homo sapiens GN=BANK1 PE=1 SV=3	T.GSRS[+79.966]FIINRPPAPTP.R	TRUE	15	Q8NDB2	BANK1	class II	Healthy B HD3
96284	S[+80]	>sp|Q8NDB2|BANK1_HUMAN B-cell scaffold protein with ankyrin repeats OS=Homo sapiens GN=BANK1 PE=1 SV=3	T.GSRS[+79.966]FIINRPPAPTP.R	TRUE	15	Q8NDB2	BANK1	class II	Healthy B HD3
97365	S[+80]	>sp|P35579|MYH9_HUMAN Myosin-9 OS=Homo sapiens GN=MYH9 PE=1 SV=4	D.GS[+79.966]DEEVDGKADGAEAKPAE.-	TRUE	19	P35579	MYH9	class I	BLCL HD4
97366	S[+80]	>sp|P35579|MYH9_HUMAN Myosin-9 OS=Homo sapiens GN=MYH9 PE=1 SV=4	G.S[+79.966]DEEVDGKADGAEAKPAE.-	TRUE	18	P35579	MYH9	class I	BLCL HD4
97558	T[+80]	>sp|Q14005|IL16_HUMAN Pro-interleukin-16 OS=Homo sapiens GN=IL16 PE=1 SV=4	G.HPDGT[+79.966]PPKL.D	TRUE	9	Q14005	IL16	class I	BLCL HD4
97590	T[+80]	>sp|O75995|SASH3_HUMAN SAM and SH3 domain-containing protein 3 OS=Homo sapiens GN=SASH3 PE=1 SV=2	A.SPT[+79.966]SPDYSL.D	TRUE	9	O75995	SASH3	class I	BLCL HD4
97672	M[+16]*2, S[+80]	>sp|P30305|MPIP2_HUMAN M-phase inducer phosphatase 2 OS=Homo sapiens GN=CDC25B PE=1 SV=2	D.SPS[+79.966]PM[+15.995]DPHM[+15.995].A	TRUE	9	P30305	CDC25B	class I	BLCL HD4
97673	M[+16]*2, S[+80]	>sp|P30305|MPIP2_HUMAN M-phase inducer phosphatase 2 OS=Homo sapiens GN=CDC25B PE=1 SV=2	D.SPS[+79.966]PM[+15.995]DPHM[+15.995].A	TRUE	9	P30305	CDC25B	class I	BLCL HD4
97674	M[+16]*2, S[+80]	>sp|P30305|MPIP2_HUMAN M-phase inducer phosphatase 2 OS=Homo sapiens GN=CDC25B PE=1 SV=2	D.SPS[+79.966]PM[+15.995]DPHM[+15.995].A	TRUE	9	P30305	CDC25B	class I	BLCL HD4
97675	M[+16], S[+80]	>sp|P30305|MPIP2_HUMAN M-phase inducer phosphatase 2 OS=Homo sapiens GN=CDC25B PE=1 SV=2	Q.RPSS[+79.966]APDLM[+15.995].C	TRUE	9	P30305	CDC25B	class I	BLCL HD4
97676	M[+16], S[+80]	>sp|P30305|MPIP2_HUMAN M-phase inducer phosphatase 2 OS=Homo sapiens GN=CDC25B PE=1 SV=2	Q.RPSS[+79.966]APDLM[+15.995].C	TRUE	9	P30305	CDC25B	class I	BLCL HD4
97677	M[+16], S[+80]	>sp|P30305|MPIP2_HUMAN M-phase inducer phosphatase 2 OS=Homo sapiens GN=CDC25B PE=1 SV=2	Q.RPSS[+79.966]APDLM[+15.995].C	TRUE	9	P30305	CDC25B	class I	BLCL HD4
98066	S[+80]	>sp|P61978|HNRPK_HUMAN Heterogeneous nuclear ribonucleoprotein K OS=Homo sapiens GN=HNRNPK PE=1 SV=1	Q.LPS[+79.966]PTATSQL.P	TRUE	10	P61978	HNRNPK	class I	BLCL HD4
98067	S[+80]	>sp|P61978|HNRPK_HUMAN Heterogeneous nuclear ribonucleoprotein K OS=Homo sapiens GN=HNRNPK PE=1 SV=1	Q.LPS[+79.966]PTATSQL.P	TRUE	10	P61978	HNRNPK	class I	BLCL HD4
98068	S[+80]	>sp|P61978|HNRPK_HUMAN Heterogeneous nuclear ribonucleoprotein K OS=Homo sapiens GN=HNRNPK PE=1 SV=1	Q.LPS[+79.966]PTATSQL.P	TRUE	10	P61978	HNRNPK	class I	BLCL HD4
98069	S[+80]	>sp|P61978|HNRPK_HUMAN Heterogeneous nuclear ribonucleoprotein K OS=Homo sapiens GN=HNRNPK PE=1 SV=1	Q.LPS[+79.966]PTATSQL.P	TRUE	10	P61978	HNRNPK	class I	BLCL HD4
98070	S[+80]	>sp|P61978|HNRPK_HUMAN Heterogeneous nuclear ribonucleoprotein K OS=Homo sapiens GN=HNRNPK PE=1 SV=1	Q.LPS[+79.966]PTATSQL.P	TRUE	10	P61978	HNRNPK	class I	BLCL HD4
98543	S[+80]	>sp|O14682|ENC1_HUMAN Ectoderm-neural cortex protein 1 OS=Homo sapiens GN=ENC1 PE=1 SV=2	C.LPAS[+79.966]PSVSL.K	TRUE	9	O14682	ENC1	class I	BLCL HD4
98878	M[+16], S[+80]	>sp|Q9UHB7|AFF4_HUMAN AF4/FMR2 family member 4 OS=Homo sapiens GN=AFF4 PE=1 SV=1	G.M[+15.995]PSPVS[+79.966]PKL.S	TRUE	9	Q9UHB7	AFF4	class I	BLCL HD4
98879	M[+16], S[+80]	>sp|Q9UHB7|AFF4_HUMAN AF4/FMR2 family member 4 OS=Homo sapiens GN=AFF4 PE=1 SV=1	G.M[+15.995]PSPVS[+79.966]PKL.S	TRUE	9	Q9UHB7	AFF4	class I	BLCL HD4
99133	M[+16], S[+80]	>sp|Q96GY3|LIN37_HUMAN Protein lin-37 homolog OS=Homo sapiens GN=LIN37 PE=1 SV=1	R.IPS[+79.966]PLQPEM[+15.995].Q	TRUE	9	Q96GY3	LIN37	class I	BLCL HD4
99278	S[+80]	>sp|Q53F19|NCBP3_HUMAN Nuclear cap-binding protein subunit 3 OS=Homo sapiens GN=NCBP3 PE=1 SV=2	K.RPHS[+79.966]PEKAF.S	TRUE	9	Q53F19	NCBP3	class I	BLCL HD4
99279	S[+80]	>sp|Q53F19|NCBP3_HUMAN Nuclear cap-binding protein subunit 3 OS=Homo sapiens GN=NCBP3 PE=1 SV=2	K.RPHS[+79.966]PEKAF.S	TRUE	9	Q53F19	NCBP3	class I	BLCL HD4
99377	S[+80]	>tr|A0A0U1RR07|A0A0U1RR07_HUMAN Synaptotagmin-like protein 2 OS=Homo sapiens GN=SYTL2 PE=4 SV=1	E.S[+79.966]AFDAGFEK.L	TRUE	9	A0A0U1RR07	SYTL2	class I	BLCL HD4
99743	S[+80]	>sp|A6ND36|FA83G_HUMAN Protein FAM83G OS=Homo sapiens GN=FAM83G PE=1 SV=2	L.LPDPGS[+79.966]PRL.A	TRUE	9	A6ND36	FAM83G	class I	BLCL HD4
99761	M[+16], S[+80]	>sp|Q7Z2E3|APTX_HUMAN Aprataxin OS=Homo sapiens GN=APTX PE=1 SV=2	A.IPS[+79.966]M[+15.995]SHVHL.H	TRUE	9	Q7Z2E3	APTX	class I	BLCL HD4
99809	T[+80]	>sp|Q99853|FOXB1_HUMAN Forkhead box protein B1 OS=Homo sapiens GN=FOXB1 PE=1 SV=3	P.TPAAVPALPALPAPIPT[+79.966].L	TRUE	17	Q99853	FOXB1	class I	BLCL HD4
99996	S[+80]	>sp|P61073|CXCR4_HUMAN C-X-C chemokine receptor type 4 OS=Homo sapiens GN=CXCR4 PE=1 SV=1	R.GSS[+79.966]LKILSKGKR.G	TRUE	12	P61073	CXCR4	class II	BLCL HD4
99997	S[+80]	>sp|P61073|CXCR4_HUMAN C-X-C chemokine receptor type 4 OS=Homo sapiens GN=CXCR4 PE=1 SV=1	R.GSS[+79.966]LKILSKGKR.G	TRUE	12	P61073	CXCR4	class II	BLCL HD4
99998	S[+80]	>sp|P61073|CXCR4_HUMAN C-X-C chemokine receptor type 4 OS=Homo sapiens GN=CXCR4 PE=1 SV=1	R.GSS[+79.966]LKILSKGKR.G	TRUE	12	P61073	CXCR4	class II	BLCL HD4
100002	S[+80]	>sp|P61073|CXCR4_HUMAN C-X-C chemokine receptor type 4 OS=Homo sapiens GN=CXCR4 PE=1 SV=1	R.GSS[+79.966]LKILSKGKRG.G	TRUE	13	P61073	CXCR4	class II	BLCL HD4
100005	S[+80]	>sp|P61073|CXCR4_HUMAN C-X-C chemokine receptor type 4 OS=Homo sapiens GN=CXCR4 PE=1 SV=1	R.GSS[+79.966]LKILSKGKRGG.H	TRUE	14	P61073	CXCR4	class II	BLCL HD4
100006	S[+80]	>sp|P61073|CXCR4_HUMAN C-X-C chemokine receptor type 4 OS=Homo sapiens GN=CXCR4 PE=1 SV=1	R.GSS[+79.966]LKILSKGKRGG.H	TRUE	14	P61073	CXCR4	class II	BLCL HD4
100007	S[+80]	>sp|P61073|CXCR4_HUMAN C-X-C chemokine receptor type 4 OS=Homo sapiens GN=CXCR4 PE=1 SV=1	R.GSS[+79.966]LKILSKGKRGG.H	TRUE	14	P61073	CXCR4	class II	BLCL HD4
100009	S[+80]	>sp|P61073|CXCR4_HUMAN C-X-C chemokine receptor type 4 OS=Homo sapiens GN=CXCR4 PE=1 SV=1	R.GSS[+79.966]LKILSKGKRGGH.S	TRUE	15	P61073	CXCR4	class II	BLCL HD4
100015	S[+80]	>sp|P61073|CXCR4_HUMAN C-X-C chemokine receptor type 4 OS=Homo sapiens GN=CXCR4 PE=1 SV=1	R.GSS[+79.966]LKILSKGKRGGHS.S	TRUE	16	P61073	CXCR4	class II	BLCL HD4
100016	S[+80]	>sp|P61073|CXCR4_HUMAN C-X-C chemokine receptor type 4 OS=Homo sapiens GN=CXCR4 PE=1 SV=1	R.GSS[+79.966]LKILSKGKRGGHS.S	TRUE	16	P61073	CXCR4	class II	BLCL HD4
100017	S[+80]	>sp|P61073|CXCR4_HUMAN C-X-C chemokine receptor type 4 OS=Homo sapiens GN=CXCR4 PE=1 SV=1	R.GSS[+79.966]LKILSKGKRGGHS.S	TRUE	16	P61073	CXCR4	class II	BLCL HD4
100025	S[+80]	>sp|P61073|CXCR4_HUMAN C-X-C chemokine receptor type 4 OS=Homo sapiens GN=CXCR4 PE=1 SV=1	R.GSS[+79.966]LKILSKGKRGGHSS.V	TRUE	17	P61073	CXCR4	class II	BLCL HD4
100026	S[+80]	>sp|P61073|CXCR4_HUMAN C-X-C chemokine receptor type 4 OS=Homo sapiens GN=CXCR4 PE=1 SV=1	R.GSS[+79.966]LKILSKGKRGGHSS.V	TRUE	17	P61073	CXCR4	class II	BLCL HD4
100027	S[+80]	>sp|P61073|CXCR4_HUMAN C-X-C chemokine receptor type 4 OS=Homo sapiens GN=CXCR4 PE=1 SV=1	R.GSS[+79.966]LKILSKGKRGGHSS.V	TRUE	17	P61073	CXCR4	class II	BLCL HD4
100028	S[+80]	>sp|P61073|CXCR4_HUMAN C-X-C chemokine receptor type 4 OS=Homo sapiens GN=CXCR4 PE=1 SV=1	R.GSS[+79.966]LKILSKGKRGGHSS.V	TRUE	17	P61073	CXCR4	class II	BLCL HD4
100029	S[+80]	>sp|P61073|CXCR4_HUMAN C-X-C chemokine receptor type 4 OS=Homo sapiens GN=CXCR4 PE=1 SV=1	R.GSS[+79.966]LKILSKGKRGGHSS.V	TRUE	17	P61073	CXCR4	class II	BLCL HD4
100030	S[+80]	>sp|P61073|CXCR4_HUMAN C-X-C chemokine receptor type 4 OS=Homo sapiens GN=CXCR4 PE=1 SV=1	R.GSS[+79.966]LKILSKGKRGGHSS.V	TRUE	17	P61073	CXCR4	class II	BLCL HD4
100031	S[+80]	>sp|P61073|CXCR4_HUMAN C-X-C chemokine receptor type 4 OS=Homo sapiens GN=CXCR4 PE=1 SV=1	R.GSS[+79.966]LKILSKGKRGGHSS.V	TRUE	17	P61073	CXCR4	class II	BLCL HD4
100032	S[+80]	>sp|P61073|CXCR4_HUMAN C-X-C chemokine receptor type 4 OS=Homo sapiens GN=CXCR4 PE=1 SV=1	R.GSS[+79.966]LKILSKGKRGGHSS.V	TRUE	17	P61073	CXCR4	class II	BLCL HD4
100033	S[+80]	>sp|P61073|CXCR4_HUMAN C-X-C chemokine receptor type 4 OS=Homo sapiens GN=CXCR4 PE=1 SV=1	R.GSS[+79.966]LKILSKGKRGGHSS.V	TRUE	17	P61073	CXCR4	class II	BLCL HD4
100034	S[+80]	>sp|P61073|CXCR4_HUMAN C-X-C chemokine receptor type 4 OS=Homo sapiens GN=CXCR4 PE=1 SV=1	R.GSS[+79.966]LKILSKGKRGGHSS.V	TRUE	17	P61073	CXCR4	class II	BLCL HD4
100035	S[+80]	>sp|P61073|CXCR4_HUMAN C-X-C chemokine receptor type 4 OS=Homo sapiens GN=CXCR4 PE=1 SV=1	R.GSS[+79.966]LKILSKGKRGGHSS.V	TRUE	17	P61073	CXCR4	class II	BLCL HD4
100055	S[+80]	>sp|P61073|CXCR4_HUMAN C-X-C chemokine receptor type 4 OS=Homo sapiens GN=CXCR4 PE=1 SV=1	S.S[+79.966]LKILSKGKRGGHSS.V	TRUE	15	P61073	CXCR4	class II	BLCL HD4
101448	S[+80]	>sp|P35579|MYH9_HUMAN Myosin-9 OS=Homo sapiens GN=MYH9 PE=1 SV=4	D.GS[+79.966]DEEVDGKADGAEAKPAE.-	TRUE	19	P35579	MYH9	class II	BLCL HD4
101449	S[+80]	>sp|P35579|MYH9_HUMAN Myosin-9 OS=Homo sapiens GN=MYH9 PE=1 SV=4	G.S[+79.966]DEEVDGKADGAEAKPAE.-	TRUE	18	P35579	MYH9	class II	BLCL HD4
101897	S[+80]	>sp|Q9BT88|SYT11_HUMAN Synaptotagmin-11 OS=Homo sapiens GN=SYT11 PE=1 SV=2	R.S[+79.966]PITSLTPGESK.T	TRUE	12	Q9BT88	SYT11	class II	BLCL HD4
101898	S[+80]	>sp|Q9BT88|SYT11_HUMAN Synaptotagmin-11 OS=Homo sapiens GN=SYT11 PE=1 SV=2	R.S[+79.966]PITSLTPGESK.T	TRUE	12	Q9BT88	SYT11	class II	BLCL HD4
102539	T[+80]	>tr|H0Y8V1|H0Y8V1_HUMAN Protein TMEM110-MUSTN1 (Fragment) OS=Homo sapiens GN=TMEM110-MUSTN1 PE=4 SV=1	R.LT[+79.966]PLKPVKKKKHR.F	TRUE	13	H0Y8V1	TMEM110-MUSTN1	class II	BLCL HD4
103466	M[+16], Y[+80]	>sp|Q63HM2|PCX4_HUMAN Pecanex-like protein 4 OS=Homo sapiens GN=PCNXL4 PE=1 SV=4	C.ADTVYYY[+79.966]QM[+15.995]VPR.L	TRUE	12	Q63HM2	PCNXL4	class II	BLCL HD4
103928	S[+80]	>sp|Q9Y4F3|MARF1_HUMAN Meiosis arrest female protein 1 OS=Homo sapiens GN=KIAA0430 PE=1 SV=6	S.VTSS[+79.966]PVEKK.D	TRUE	9	Q9Y4F3	KIAA0430	class I	BLCL HD1
103951	S[+80]	>sp|Q8IWI9|MGAP_HUMAN MAX gene-associated protein OS=Homo sapiens GN=MGA PE=1 SV=3	S.SVSS[+79.966]PVKSK.G	TRUE	9	Q8IWI9	MGA	class I	BLCL HD1
103973	S[+80]	>sp|Q68D10|SPT2_HUMAN Protein SPT2 homolog OS=Homo sapiens GN=SPTY2D1 PE=1 SV=3	S.STSS[+79.966]PSVPK.T	TRUE	9	Q68D10	SPTY2D1	class I	BLCL HD1
103983	S[+80]	>sp|Q9BXB4|OSB11_HUMAN Oxysterol-binding protein-related protein 11 OS=Homo sapiens GN=OSBPL11 PE=1 SV=2	S.SSNS[+79.966]PISQR.R	TRUE	9	Q9BXB4	OSBPL11	class I	BLCL HD1
104023	S[+80]	>sp|Q9Y2W1|TR150_HUMAN Thyroid hormone receptor-associated protein 3 OS=Homo sapiens GN=THRAP3 PE=1 SV=2	S.RSYS[+79.966]PAHNR.E	TRUE	9	Q9Y2W1	THRAP3	class I	BLCL HD1
104025	S[+80]	>sp|Q8IYB3|SRRM1_HUMAN Serine/arginine repetitive matrix protein 1 OS=Homo sapiens GN=SRRM1 PE=1 SV=2	S.RSPS[+79.966]PAPEK.K	TRUE	9	Q8IYB3	SRRM1	class I	BLCL HD1
104046	S[+80]	>sp|Q7Z460|CLAP1_HUMAN CLIP-associating protein 1 OS=Homo sapiens GN=CLASP1 PE=1 SV=1	S.RETS[+79.966]PNRIGL.A	TRUE	10	Q7Z460	CLASP1	class I	BLCL HD1
104075	S[+80]	>sp|Q9NTI5|PDS5B_HUMAN Sister chromatid cohesion protein PDS5 homolog B OS=Homo sapiens GN=PDS5B PE=1 SV=1	S.KTPS[+79.966]PSQPK.K	TRUE	9	Q9NTI5	PDS5B	class I	BLCL HD1
104237	S[+80]	>sp|Q8IYB3|SRRM1_HUMAN Serine/arginine repetitive matrix protein 1 OS=Homo sapiens GN=SRRM1 PE=1 SV=2	R.RTAS[+79.966]PPPPPK.R	TRUE	10	Q8IYB3	SRRM1	class I	BLCL HD1
104245	S[+80]	>sp|O60292|SI1L3_HUMAN Signal-induced proliferation-associated 1-like protein 3 OS=Homo sapiens GN=SIPA1L3 PE=1 SV=3	R.REVS[+79.966]PAPAV.A	TRUE	9	O60292	SIPA1L3	class I	BLCL HD1
[truncated: 29 more rows]
