# Supplementary material
Source: HighWire-hosted journal article supplement (https://jitc.bmj.com/content/11/9/e006889)
Supplement: inline-supplementary-material-3 [file inline-supplementary-material-3.xlsx]

## Sheet: Sheet1
	SI Table 5: Selected phosphopeptides found on C0701 and/or C0702 samples examined for further study.
Peptide name	Sequence	Phospho sequence	Gene	Monoallelic presentation	Other sample presentation
pRBM14	FRRSPTKSSL	_FRRS(ph)PTKSSL_	RBM14	C1R-C0702, C1R-C0701	BLCL HD2, HCT116, Mel-8, JY, Mel-16
pRAF1	HRYSTPHAF	_HRYS(ph)TPHAF_	RAF1	C1R-C0702, C1R-C0701	THP1, JY BLCL, RA597 BLCL, PD42 BLCL
pMYO9B	RRYSDPPTY	_RRYS(ph)DPPTY_	MYO9B	C1R-C0702, C1R-C0701	3912-BAM,3947-GA,4021,FLMS002,FLMS004,GR BLCL,MCL065,Mel-15,PD42,RA957
pZNF518A	RRFSGTAVY	_RRFS(ph)GTAVY_	ZNF518A	C1R-C0702, C1R-C0701	3795-BMT,AC BLCL,GD149,GR BLCL,HCT116,JY,Mel-12,Mel-15,Mel-21,Mel-26,Mel-5,PD42,RA957,UWB1289_IFNg
pWNK	KRASFAKSV	_KRAS(ph)FAKSV_	WNK1;WNK2;WNK4	C1R-C0701	CD165,CM647,GD149,HCC1143,HCT116,Mel-21,Mel-24,Mel-25,Mel-26,Mel-3,THP1
pSTMN	KRASGQAFEL	_KRAS(ph)GQAFEL_	STMN1;STMN2	C1R-C0702, C1R-C0701	BLCL HD3,GR BLCL,HCC1937,JY,Mel-8
pNCOR	RRPSLLSEF	_RRPS(ph)LLSEF_	NCOR1;NCOR2	C1R-C0701	3865-DM,CD165,CM647,GR BLCL,Mel-16,Mel-21,Mel-24,Mel-8
